# Supplementary material for: A Live Cell Protein Complementation Assay for ORFeome-Wide Probing of Human HOX Interactomes
Source: Cells. 2023 Jan 3;12(1):200. doi: 10.3390/cells12010200 (PMC9818449; doi:10.3390/cells12010200)
Supplement: Supplementary file 1 [file cells-12-00200-s001.zip]

Archive with 9 entries (9 files):
- Figures S1-S11.pdf
- Table S1.xlsx
- Table S2.xlsx
- Table S3.xlsx
- Table S4.xlsx
- Table S5.xlsx
- Table S6.xlsx
- Table S7.xls
- Table S8.xlsx
