# Supplementary material for: A Live Cell Protein Complementation Assay for ORFeome-Wide Probing of Human HOX Interactomes
Source: Cells. 2023 Jan 3;12(1):200. doi: 10.3390/cells12010200 (PMC9818449; doi:10.3390/cells12010200)
Supplement: Supplementary file 1 [file cells-12-00200-s001.zip › Table S1.xlsx]

## Sheet: Feuil1
Supplementary Table S1. List of the 5799 CC-ORFs present in the HEK cell line-1.
ENTREZ_ID	id	Official_sym	ORF_size
10	BC015878	NAT2	873
100	BC007678	ADA	1092
10002	BC041421	NR2E3	969
10007	BC020769	GNPDA1	870
10008	BC032235	KCNE3	312
1001	BC041846	CDH3	2490
10010	BC067779	TANK	1278
10013	BC013737	HDAC6	3192
10016	BC012384	PDCD6	576
10025	BC004554	MED16	2526
10026	BC020737	PIGK	1188
10039	BC014260	PARP3	1602
10047	BC069496	CST8	429
10049	BC002446	DNAJB6	981
10053	BC005021	AP1M2	1278
10062	BC008819	NR1H3	1164
10063	BC010933	COX17	192
10066	BC004385	SCAMP2	990
10067	BC000161	SCAMP3	1044
10068	BC044215	IL18BP	585
10069	BC017912	RWDD2B	960
10072	BC001446	DPP3	2214
10077	BC016693	TSPAN32	777
10078	BC006091	TSSC4	990
10083	BC016057	USH1C	1602
10084	BC012358	PQBP1	798
10092	BC057237	ARPC5	465
10094	BC067747	ARPC3	537
10096	BC044590	ACTR3	1257
10097	BC014546	ACTR2	1185
10098	BC009704	TSPAN5	807
10099	BC000704	TSPAN3	759
10100	BC021675	TSPAN2	666
10101	BC008005	NUBP2	816
10103	BC007290	TSPAN1	726
10105	BC005020	PPIF	624
10112	BC012999	KIF20A	2673
10113	BC016472	PREB	1254
10120	BC004374	ACTR1B	1131
10124	BC001111	ARL4A	603
10127	BC008805	ZNF263	2052
10133	BC032762	OPTN	1716
10134	BC014323	BCAP31	741
10136	BC008383	CELA3A	813
10138	BC037777	YAF2	615
10144	BC063126	FAM13A	609
10148	BC015364	EBI3	690
10152	BC001439	ABI2	1428
10158	BC012303	PDZK1IP1	345
10165	BC006566	SLC25A13	2028
10166	BC002702	SLC25A15	906
1017	BC003065	CDK2	897
10171	BC001025	RCL1	1122
10172	BC001438	ZNF256	1425
10174	BC010146	SORBS3	990
10186	BC017824	LHFPL6	603
10188	BC028164	TNK2	1587
1019	BC005864	CDK4	912
10193	BC032637	RNF41	954
10195	BC002839	ALG3	1317
1020	BC005115	CDK5	879
10200	BC031017	MPHOSPH6	483
10201	BC001808	NME6	585
10202	BC002786	DHRS2	903
10205	BC017774	MPZL2	648
1021	BC052264	CDK6	981
10212	BC010455	DDX39A	951
10218	BC001881	ANGPTL7	1041
10219	BC012621	KLRG1	588
1022	BC005298	CDK7	1041
10223	BC069789	GPA33	960
10225	BC020749	CD96	1209
10226	BC007566	PLIN3	1305
10227	BC014979	MFSD10	1368
10228	BC009944	STX6	768
10229	BC003185	COQ7	654
10230	BC000924	NBR2	249
10231	BC038509	RCAN2	678
10237	BC011888	SLC35B1	969
10238	BC001264	DCAF7	1029
10239	BC010020	AP3S2	582
10241	BC004130	CALCOCO2	1341
10242	BC017825	KCNMB2	708
10244	BC065725	RABEPK	1119
10245	BC010142	TIMM17B	519
10247	BC010280	RIDA	414
10248	BC001430	POP7	423
10249	BC009785	GLYAT	492
1025	BC001968	CDK9	1119
10253	BC004205	SPRY2	1062
10257	BC041560	ABCC4	2580
10261	BC017844	IGSF6	726
10262	BC013886	SF3B4	1275
10267	BC000548	RAMP1	447
10268	BC022304	RAMP3	447
10269	BC037283	ZMPSTE24	1428
1027	BC001971	CDKN1B	597
10273	BC007545	STUB1	912
10276	BC010285	NET1	1629
10278	BC034246	EFS	1407
10280	BC007839	SIGMAR1	321
10281	BC069729	DSCR4	357
10284	BC030836	SAP18	462
10285	BC011234	SMNDC1	717
10290	BC006346	SPEG	342
10295	BC007363	BCKDK	1239
10298	BC002921	PAK4	1281
1030	BC014469	CDKN2B	417
10300	BC001353	KATNB1	1968
10301	BC020692	DLEU1	237
1031	BC000598	CDKN2C	507
10313	BC010556	RTN3	711
10314	BC028685	LANCL1	1200
10316	BC051914	NMUR1	1281
1032	BC001822	CDKN2D	501
10320	BC018349	IKZF1	1434
10321	BC069580	CRISP3	738
10327	BC000670	AKR1A1	978
10342	BC001483	TFG	1203
10346	BC035582	TRIM22	1497
10352	BC044575	WARS2	1083
10360	BC054868	NPM3	537
10362	BC004408	HMG20B	954
10363	BC021959	HMG20A	1044
10367	BC016641	MICU1	1431
10368	BC040005	CACNG3	948
10369	BC069612	CACNG2	972
10379	BC035716	IRF9	1182
10381	BC000748	TUBB3	1353
10382	BC006570	TUBB4A	1335
10385	BC014021	BTN2A2	1572
1039	BC017503	CDR2	1332
10391	BC026335	CORO2B	1428
10392	BC040339	NOD1	2862
10397	BC003175	NDRG1	1185
10400	BC050593	PEMT	711
10401	BC001154	PIAS3	1860
10406	BC046106	WFDC2	375
1041	BC031993	CDSN	1587
10411	BC040534	RAPGEF3	966
10417	BC036341	SPON2	996
10420	BC033085	TESK2	1629
10422	BC004967	UBAC1	1218
10423	BC001444	CDIPT	642
10424	BC016692	PGRMC2	672
10425	BC000422	ARIH2	1482
10426	BC013781	TUBGCP3	2475
10430	BC001118	TMEM147	675
10431	BC062707		627
10432	BC000488	RBM14	2010
10434	BC008652	LYPLA1	693
10435	BC022337	CDC42EP2	633
10436	BC055314	EMG1	735
10437	BC031020	IFI30	753
10438	BC005235	C1D	426
10439	BC008763	OLFM1	1404
10444	BC052563	ZER1	2301
10445	BC011794	MCRS1	1389
1045	BC014461	CDX2	942
10450	BC004898	PPIE	906
10454	BC050554	TAB1	1515
10456	BC015209	HAX1	840
10457	BC011595	GPNMB	621
10458	BC032559	BAIAP2	1539
10459	BC015244	MAD2L2	636
10462	BC027858	CLEC10A	771
10465	BC003412	PPIH	534
10467	BC017333	ZNHIT1	465
10469	BC033628	TIMM44	1359
10472	BC036677	ZBTB18	1569
10473	BC001282	HMGN4	273
10474	BC013433	TADA3	1299
10475	BC026930	TRIM38	1398
10476	BC038092	ATP5PD	486
10477	BC003554	UBE2E3	624
10478	BC005957	SLC25A17	924
10479	BC049169	SLC9A6	2106
10481	BC007092	HOXB13	855
10486	BC008481	CAP2	1434
10488	BC009402	CREB3	1116
10489	BC004953	LRRC41	1695
10490	BC003142	VTI1B	699
10491	BC008745	CRTAP	1206
10494	BC007852	STK25	1281
10495	BC019254	ENOX2	954
10518	BC047381	CIB2	564
10525	BC004560	HYOU1	444
1053	BC035797	CEBPE	846
10533	BC000091	ATG7	2031
10534	BC014791	ZNRD2	600
10537	BC012472	UBD	498
10538	BC032294	BATF	378
1054	BC013128	CEBPG	453
10544	BC014451	PROCR	717
10548	BC010856	TM9SF1	1821
10549	BC003609	PRDX4	816
10550	BC005143	ARL6IP5	567
10552	BC039594	ARPC1A	1113
10553	BC015358	HTATIP2	729
10554	BC002402	AGPAT1	852
10555	BC000026	AGPAT2	837
10556	BC006991	RPP30	807
10557	BC029494	RPP38	852
10558	BC068537	SPTLC1	1542
10561	BC022870	IFI44	1335
10571	BC050737		423
10572	BC034562	SIVA1	333
10573	BC000507	MRPL28	771
10574	BC019296	CCT7	1632
10578	BC023576	GNLY	438
1058	BC002703	CENPA	423
10586	BC009983	MAB21L2	1080
10588	BC019921	MTHFS	612
10589	BC010025	DRAP1	618
10590	BC000336	SCGN	831
10591	BC011683	DNPH1	525
10597	BC008889	TRAPPC2B	423
10602	BC019270	CDC42EP3	765
10606	BC010273	PAICS	1278
10607	BC014007	TBL3	2425
10608	BC002713	MXD4	177
10609	BC001047	P3H4	1314
10610	BC040455	ST6GALNAC2	1125
10611	BC017902	PDLIM5	645
10614	BC006460	HEXIM1	1080
10616	BC000983	RBCK1	693
10617	BC007682	STAMBP	1275
10621	BC012588	POLR3F	951
10623	BC004424	POLR3C	1236
10626	BC053514	TRIM16	1695
10627	BC016372	MYL12A	516
10629	BC008785	TAF6L	1380
10632	BC070165	ATP5MG	312
10633	BC040434	RASL10A	348
10635	BC006992	RAD51AP1	1008
10636	BC014094	RGS14	1701
10643	BC051296	IGF2BP3	303
10644	BC021290	IGF2BP2	1797
10648	BC069289	SCGB1D1	273
10651	BC067831	MTX2	792
10652	BC007319	YKT6	597
10653	BC001668	SPINT2	759
10654	BC007694	PMVK	579
10656	BC032606	KHDRBS3	1041
1066	BC012418	CES1	1701
10664	BC014267	CTCF	2184
10667	BC021112	FARS2	1356
10668	BC015063	CGRRF1	999
10669	BC034764	CGREF1	906
10670	BC006433	RRAGA	942
10673	BC020674	TNFSF13B	858
10677	BC004134	AVIL	2991
10681	BC013997	GNB5	1062
10686	BC069759	CLDN16	918
10687	BC062301	PNMA2	1095
10690	BC036101	FUT9	1080
10691	BC001473	GMEB1	1692
10695	BC004423	CNPY3	837
1070	BC005383	CETN3	504
10712	BC040136	FAM189B	1719
1072	BC018256	CFL1	501
10723	BC007760	SLC12A7	801
10728	BC003005	PTGES3	483
10736	BC024033	SIX2	876
10738	BC031689	RFPL3	867
10741	BC015938	RBBP9	561
10745	BC002447	PHTF1	1914
10758	BC002823	TRAF3IP2	1698
10761	BC022335	PLAC1	639
10766	BC038957	TOB2	1035
10771	BC034784	ZMYND11	1584
10772	BC001107	SRSF10	552
10773	BC037282	ZBTB6	1275
10775	BC004438	POP4	663
10782	BC009763	ZNF274	1962
10783	BC000101	NEK6	942
10785	BC006341	WDR4	1239
10786	BC017952	SLC17A3	1263
10791	BC017891	VAMP5	351
10793	BC063818	ZNF273	1515
10799	BC017871	RPP40	735
10801	BC021192	SEPTIN9	1707
10809	BC007919	STARD10	876
1081	BC020782	CGA	351
10811	BC041594	NOXA1	1452
10818	BC021562	FRS2	1539
10826	BC007216	FAXDC2	1002
10840	BC027241	ALDH1L1	1518
10856	BC008355	RUVBL2	780
10857	BC034238	PGRMC1	588
10861	BC015517	SLC26A1	675
10864	BC017963	SLC22A7	708
10865	BC067301	ARID5A	1293
10867	BC034280	TSPAN9	474
10868	BC039593	USP20	2742
10870	BC046348	HCST	282
10871	BC022279	CD300C	675
10874	BC012908	NMU	525
10876	BC069407	EDDM3A	444
10879	BC015327	SMR3B	240
10880	BC033789	ACTL7B	1248
10885	BC058836	WDR3	123
10890	BC000896	RAB10	603
10894	BC026231	LYVE1	969
10897	BC001299	YIF1A	882
10898	BC050738	CPSF4	732
10902	BC008039	BRD8	2763
10908	BC050553	PNPLA6	3984
10914	BC000927	PAPOLA	858
10919	BC020970	EHMT2	3006
10920	BC003090	COPS8	630
10921	BC001659	RNPS1	918
10924	BC018999	SMPDL3A	1362
10935	BC002685	PRDX3	771
10943	BC031210	MSL3	1566
10945	BC018778	KDELR1	639
10946	BC011523	SF3A3	1506
10947	BC056257	AP3M2	822
10948	BC025679	STARD3	1338
10949	BC011972	HNRNPA0	918
10954	BC001625	PDIA5	789
10959	BC025957	TMED2	606
10960	BC017263	LMAN2	1071
10962	BC009624	MLLT11	273
10965	BC004436	ACOT2	1266
10966	BC018039	RAB40B	837
10972	BC001496	TMED10	660
10973	BC050681	ASCC3	336
10980	BC002520	COPS6	984
10982	BC007318	MAPRE2	984
10987	BC001187	COPS5	1005
10990	BC025704	LILRB5	1773
10991	BC042875	SLC38A3	1515
10992	BC007610	SF3B2	1911
10993	BC020750	SDS	657
10999	BC009959	SLC27A4	714
11001	BC057770	SLC27A2	1704
11006	BC026309	LILRB4	1347
11007	BC008796	CCDC85B	609
11009	BC009681	IL24	624
11010	BC012510	GLIPR1	801
11011	BC044925	TLK2	2316
11012	BC022068	KLK11	753
11014	BC071982	KDELR2	561
11015	BC001277	KDELR3	645
11016	BC042363	ATF7	354
11017	BC017890	SNRNP27	468
11019	BC062751	LIAS	429
11021	BC015931	RAB35	606
11022	BC032690	TDRKH	1686
11030	BC003608	RBPMS	660
11035	BC041668	RIPK3	522
11036	BC025991	GTF2A1L	1437
1104	BC007300	RCC1	1266
11040	BC018111	PIM2	936
11047	BC017245	ADRM1	1224
11051	BC001403	NUDT21	684
11052	BC000714	CPSF6	1767
11054	BC014137	OGFR	1974
11057	BC019248	ABHD2	1278
11061	BC025659	CNMD	1002
11067	BC011402	DEPP1	639
11068	BC047691	CYB561D2	669
11072	BC001894	DUSP14	597
11074	BC017017	TRIM31	1278
11079	BC004965	RER1	591
11080	BC034721	DNAJB4	1014
11083	BC012757	DIDO1	1437
1109	BC020744	AKR1C4	972
11091	BC001635	WDR5	1005
11092	BC012940	SPACA9	669
11094	BC030558	CACFD1	519
11098	BC001278	PRSS23	1152
11102	BC012017	RPP14	375
11103	BC033887	KRR1	1146
11104	BC050428	KATNA1	936
11107	BC066942	PRDM5	336
11108	BC035581	PRDM4	2406
11116	BC011902	FGFR1OP	1140
11118	BC002832	BTN3A2	999
1112	BC007506	FOXN3	1407
11120	BC016661	BTN2A1	1005
11123	BC035854	RCAN3	726
11127	BC045542	KIF3A	2109
11129	BC080554	CLASRP	1980
1113	BC001059	CHGA	1374
11130	BC020979	ZWINT	834
11136	BC017962	SLC7A9	1464
11143	BC032640	KAT7	1836
11144	BC035658	DMC1	498
11149	BC040502	BVES	870
11152	BC069206	WDR45	1086
11155	BC010929	LDB3	852
11157	BC016026	LSM6	243
11158	BC014879	RABL2B	690
1116	BC038354	CHI3L1	1152
11162	BC009842	NUDT6	951
11163	BC051310	NUDT4	543
11165	BC007727	NUDT3	519
11167	BC000055	FSTL1	927
1117	BC011460	CHI3L2	1173
11171	BC000162	STRAP	1053
11179	BC020626	ZNF277	837
11180	BC002826	WDR6	870
11197	BC018037	WIF1	1140
11202	BC040887	KLK8	783
11212	BC012334	PLPBP	828
11213	BC057800	IRAK3	1791
11218	BC031062	DDX20	2475
11221	BC063826	DUSP10	1449
11224	BC000348	RPL35	372
11226	BC035822	GALNT6	1869
1123	BC011393	CHN1	1380
11231	BC048287	SEC63	2283
11232	BC009194	POLG2	1458
11236	BC021571	RNF139	1995
11238	BC028142	CA5B	954
112398	BC001723	EGLN2	378
11243	BC065031	PMF1	618
112479	BC010503	ERI2	987
11248	BC022541	NXPH3	759
112483	BC011751	SAT2	513
112487	BC010618	DTD2	507
112495	BC011593	GTF3C6	642
11253	BC006079	MAN1B1	2100
11258	BC000319	DCTN3	531
112597	BC010491	CYTOR	159
112609	BC010003	MRAP2	618
112616	BC010116	CMTM7	528
11264	BC001147	PXMP4	639
11267	BC008976	SNF8	777
11269	BC010008	DDX19B	1113
11270	BC039865	NRM	789
112703	BC071737	FAM71E1	696
112714	BC057811	TUBA3E	1353
112724	BC009881	RDH13	783
11274	BC014896	USP18	1119
112752	BC010436	IFT43	642
11277	BC023630	TREX1	1110
11278	BC019680	KLF12	1209
1128	BC022984	CHRM1	1383
112812	BC063460	FDX2	552
112817	BC057821	HOGA1	495
11282	BC009464	MGAT4B	891
11284	BC002519	PNKP	1449
11285	BC007317	B4GALT7	984
112858	BC009727	TP53RK	762
112885	BC012187	PHF21B	1596
112936	BC009747	VPS26B	1011
112937	BC011001	GLB1L3	942
112950	BC010543	MED8	639
112970	BC012173	KTI12	1065
11313	BC017034	LYPLA2	696
113130	BC011000	CDCA5	759
11314	BC032352	CD300A	900
11315	BC008188	PARK7	570
113177	BC014609	IZUMO4	645
113178	BC016509	SCAMP4	690
11319	BC000721	ECD	1935
113201	BC063480	CASC4	1302
11321	BC007451	GPN1	1125
11322	BC007766	TMC6	636
113235	BC010691	SLC46A1	1296
113251	BC022377	LARP4	567
11326	BC010525	VSIG4	1200
113277	BC012139	TMEM106A	789
113278	BC009750	SLC52A3	1410
11329	BC012085	STK38	1398
1133	BC068528	CHRM5	1599
11330	BC015118	CTRC	807
11331	BC014766	PHB2	900
11332	BC017365	ACOT7	1017
11334	BC023976	TUSC2	333
11338	BC008740	U2AF2	1416
113386	BC011670		225
11339	BC015050	OIP5	690
1134	BC006314	CHRNA1	810
11340	BC020773	EXOSC8	831
11344	BC003161	TWF2	1050
113444	BC011880	SMIM12	279
11345	BC014594	GABARAPL2	354
113452	BC013953	TMEM54	669
1136	BC006114	CHRNA3	1470
113622	BC009755	ADPRHL1	819
113691	BC009991	TUBA3FP	465
113763	BC011406	ZBED6CL	711
113791	BC011049	PIK3IP1	792
1138	BC033639	CHRNA5	1407
113828	BC011204	FAM83F	999
113829	BC009906	SLC35A4	975
113878	BC018555	DTX2	1869
1139	BC037571	CHRNA7	966
114034	BC009364	TOE1	1533
114049	BC011696	BUD23	846
114131	BC069530	UCN3	486
114299	BC039306	PALM2	1140
114569	BC012367	MAL2	531
114571	BC022379	SLC22A9	717
114609	BC032474	TIRAP	771
114757	BC029798	CYGB	573
114780	BC014157	PKD1L2	921
114793	BC036492	FMNL2	537
114818	BC015667	KLHL29	1512
114826	BC035077	SMYD4	2415
114881	BC065482	OSBPL7	2529
114897	BC021553	C1QTNF1	846
114898	BC054506	C1QTNF2	858
1149	BC031896	CIDEA	762
114900	BC035628	C1QTNF4	990
114904	BC020551	C1QTNF6	837
114907	BC024030	FBXO32	633
114932	BC066897	MRFAP1L1	384
114971	BC020242	PTPMT1	606
114977	BC065572		1272
114984	BC014089	FLYWCH2	423
115024	BC014132	NT5C3B	879
115098	BC013949	CCDC124	672
115106	BC005958	HAUS1	609
115196	BC047777	ZNF554	1617
1152	BC010002	CKB	1146
115201	BC061696	ATG4A	1197
115286	BC012852	SLC25A26	561
115290	BC012385	FBXO17	837
115330	BC014241	GPR146	1002
115353	BC013101	LRRC42	1287
1154	BC031590	CISH	777
115416	BC012331	MALSU1	705
1155	BC005969	TBCB	735
115509	BC014000	ZNF689	1503
115572	BC012790	TENT5B	1275
115584	BC057780	SLC5A11	1836
115677	BC014189	NOSTRIN	1287
115708	BC010167	TRMT61A	870
115761	BC013150	ARL11	591
115795	BC028122	FANCD2OS	534
115811	BC013151	IQCD	1044
115817	BC015943	DHRS1	942
115825	BC014004	WDFY2	1203
115861	BC014127	NXNL1	639
115939	BC011785	TSR3	531
115948	BC014252	CCDC151	1215
115950	BC014187	ZNF653	1848
115992	BC017226	RNF166	714
1160	BC029140	CKMT2	1260
116039	BC016936	OSR2	831
116068	BC058027	LYSMD3	384
116092	BC024290	DNTTIP1	990
1161	BC009793	ERCC8	618
116135	BC040656	LRRC3B	780
116138	BC012987	KLHDC3	624
116143	BC014022	WDR92	867
116159	BC036761	CYYR1	465
116211	BC013113	TM4SF19	630
116224	BC013062	FAM122A	864
116225	BC012948	ZMYND19	684
116238	BC014072	TLCD1	744
116254	BC014320	GINM1	993
1163	BC007751	CKS1B	240
116442	BC009714	RAB39B	642
116461	BC022030	TSEN15	516
116832	BC012328	RPL39L	156
116841	BC018760	SNAP47	1395
116844	BC070198	LRG1	1044
116969	BC014577	ART5	879
117143	BC015401	TADA1	1008
117156	BC024232	SCGB3A2	282
117157	BC022407	SH2D1B	399
117159	BC062682	DCD	333
117177	BC059358	RAB3IP	948
117247	BC017968	SLC16A10	606
117286	BC069428	CIB3	417
117289	BC015859	TAGAP	801
1173	BC013796	AP2M1	1302
1175	BC006337	AP2S1	429
117581	BC033168	TWIST2	483
117584	BC028424	RFFL	984
1176	BC000804	AP3S1	582
1181	BC021578	CLCN2	1164
118426	BC013668	BORCS5	591
118427	BC022531	OLFM3	1377
118429	BC034001	ANTXR2	459
118812	BC010230	MORN4	441
118813	BC030621	ZFYVE27	1032
118881	BC047774	COMTD1	789
118932	BC021671	ANKRD22	576
118980	BC022091	SFXN2	969
119032	BC015994	BORCS7	318
119180	BC066294	LYZL2	585
1193	BC022305	CLIC2	744
119369	BC029544	NUDT9P1	363
119392	BC020892	SFR1	699
119395	BC043367	CALHM3	1053
119467	BC029478	CLRN3	681
119504	BC009530	ANAPC16	333
119559	BC063562	SFXN4	1014
1196	BC053603	CLK2	1500
119710	BC051031	C11orf74	666
1198	BC006103	CLK3	1404
12	BC034554	SERPINA3	1272
120196	BC025668		315
120224	BC016153	TMEM45B	828
120534	BC047775	ARL14EP	783
121053	BC032326	C12orf45	567
1212	BC006457	CLTB	636
121268	BC027482	RHEBL1	552
121274	BC018090	ZNF641	909
1215	BC069370	CMA1	744
121504	BC019846	HIST4H4	312
121506	BC030218	ERP27	822
121536	BC022220	AEBP2	888
121599	BC032317	SPIC	747
121793	BC029889	TEX29	456
122011	BC028723	CSNK1A1L	1014
122046	BC030277	TEX26	870
122509	BC015423	IFI27L1	315
122553	BC047328	TRAPPC6B	393
122616	BC011537	CLBA1	252
122618	BC015003	PLD4	1470
122769	BC030142	LRR1	441
122786	BC020521	FRMD6	1845
123	BC005127	PLIN2	1314
1230	BC051306	CCR1	1068
123016	BC026351	TTC8	1596
1232	BC033514	CCR3	1068
123228	BC031411	SENP8	639
123606	BC025678	NIPA1	765
1238	BC020558	ACKR2	1155
123811	BC022321	FOPNL	525
123887	BC029149		504
123970	BC021181	C16orf78	798
124044	BC027606	SPATA2L	459
1241	BC004545	LTB4R	1059
124221	BC041609	PRSS30P	441
124401	BC050387	ANKS3	1584
124402	BC062534	UBALD1	534
124454	BC040013	EARS2	1605
124460	BC063423	SNX20	309
124491	BC018082	TMEM170A	435
124540	BC001526	MSI2	987
124583	BC017655	CANT1	1206
124602	BC026362	KIF19	360
124626	BC043152	ZPBP2	948
124641	BC041170	OVCA2	684
124773	BC048806	C17orf64	381
124790	BC025970	HEXIM2	861
124808	BC047776	CCDC43	684
124817	BC026187	CNTD1	993
124935	BC071859	SLC43A2	1470
124936	BC051697	CYB5D2	795
124944	BC040036	C17orf49	519
124995	BC052601	MRPL10	786
125058	BC000248	TBC1D16	444
125113	BC032815	KRT222	888
125144	BC027986	SNHG29	393
125170	BC014973	MIEF2	1365
125206	BC039868	SLC5A10	1701
125228	BC022410	FAM210A	819
125476	BC048989	INO80C	414
126003	BC042161	TRAPPC5	567
126070	BC035760	ZNF440	1788
126147	BC033207	NTN5	1470
126259	BC015655	TMIGD2	849
126282	BC017672	TNFAIP8L1	561
126299	BC015950	ZNF428	567
126306	BC021201	JSRP1	996
126308	BC015049	MOB3A	654
126321	BC036706	MFSD12	1416
126364	BC071640	LRRC25	918
126382	BC057837	NR2C2AP	420
126433	BC014527	FBXO27	852
126526	BC023623	C19orf47	846
126626	BC027033	GABPB2	1347
1267	BC006392	CNP	1266
126789	BC034304	PUSL1	912
126823	BC066896	KLHDC9	1050
126961	BC015544	HIST2H3C	411
1271	BC001492	CNTFR	1119
127247	BC036573	ASB17	888
127281	BC022547	PRXL2B	597
127428	BC035374	TCEANC2	627
127435	BC030608	PODN	1986
127495	BC009613	LRRC39	1008
127534	BC034709	GJB4	801
127540	BC021180	HMGB4	561
127703	BC026909	C1orf216	690
127795	BC042203	C1orf87	417
1278	BC054498	COL1A2	4101
127845	BC058832	GOLT1A	399
128	BC014665	ADH5	1125
128061	BC036800	C1orf131	849
128153	BC014608	SPATA17	1086
128218	BC016858	TMEM125	660
128338	BC047025	DRAM2	627
128346	BC017973	C1orf162	468
128414	BC041812	NKAIN4	627
128434	BC033818	VSTM2L	615
128439	BC040237	SNHG11	252
128646	BC033502	SIRPD	594
128653	BC021178	C20orf141	456
128821	BC029656	CST9L	444
128864	BC032818	C20orf144	462
128866	BC033859	CHMP4B	675
128989	BC041339	TANGO2	831
129025	BC053901	ZNF280A	1629
129138	BC014641	ANKRD54	903
129285	BC040721	PPP1R21	1092
129303	BC050466	TMEM150A	816
129401	BC047029	NUP35	981
129446	BC022888	XIRP2	387
1295	BC013581	COL8A1	2235
129530	BC029126	LYG1	585
129563	BC036113	DIS3L2	1839
129685	BC033728	TAF8	525
1297	BC015409	COL9A1	987
129787	BC032379	TMEM18	384
129807	BC012899	NEU4	693
129868	BC015353	TRIM43	1341
129880	BC044593	BBS5	1026
130026	BC000993	ICA1L	564
130162	BC029502	CLHC1	1761
130340	BC009606	AP1S3	495
130540	BC031603	FLACC1	1269
130557	BC052282	ZNF513	1626
130560	BC047704	SPATA3	552
130576	BC018203	LYPD6B	423
130612	BC080573	TMEM198	1083
130617	BC018415	ZFAND2B	774
130619	BC031585		492
130814	BC027625	PQLC3	609
130827	BC020898	TMEM182	333
130888	BC017869	FBXO36	270
131034	BC014396	CPNE4	1674
131177	BC015359	FAM3D	675
1312	BC011935	COMT	816
131408	BC037299	FAM131A	846
131450	BC069661	CD200R1	1047
131540	BC034801	ZDHHC19	732
131583	BC039689	FAM43A	1272
1316	BC004301	KLF6	783
131601	BC017058	TPRA1	720
131616	BC019851	TMEM42	480
1317	BC013611	SLC31A1	573
1318	BC026252	SLC31A2	432
132001	BC015088	TAMM41	951
132141	BC029595	IQCF1	618
132158	BC042151	GLYCTK	1572
132200	BC015210	C3orf49	879
132204	BC022518	SYNPR	798
132228	BC028000	LSMEM2	495
132299	BC032808	OCIAD2	300
132321	BC032582	C4orf33	600
1327	BC047869	COX4I1	252
132851	BC029428	SPATA4	846
1329	BC006229	COX5B	390
132989	BC016746	C4orf36	354
133015	BC023002	PACRGL	666
133383	BC036528	SETD9	900
133418	BC059398	EMB	984
133688	BC068446	UGT3A1	1572
133690	BC017586	CAPSL	597
1337	BC007723	COX6A1	330
133874	BC030767	C5orf58	165
133957	BC015349	CCDC127	783
134187	BC029532	POU5F2	915
134285	BC018083	TMEM171	975
134288	BC019346	TMEM174	732
134492	BC017934	NUDCD2	474
134637	BC037955	ADAT2	483
1349	BC018386	COX7B	243
135	BC013780	ADORA2A	1239
1350	BC001005	COX7C	192
1351	BC063025	COX8A	210
135138	BC044227	PACRG	774
135154	BC018085	SDHAF4	327
1352	BC000060	COX10	1332
1353	BC005895	COX11	831
135398	BC036917	C6orf141	714
1357	BC005279	CPA1	1260
1358	BC007009	CPA2	1254
135886	BC030643	TMEM270	798
1359	BC012613	CPA3	1254
135932	BC035517	TMEM139	651
136	BC025722	ADORA2B	999
1361	BC007057	CPB2	1272
136263	BC017587	SSMEM1	735
1364	BC000671	CLDN4	630
1365	BC016056	CLDN3	663
1366	BC071844	CLDN7	636
136647	BC026265	MPLKIP	540
136853	BC015651	SSC4D	573
136895	BC060879	C7orf31	1773
1369	BC027897	CPN1	1377
137392	BC014598	FAM92A	816
137492	BC067754	VPS37A	1194
137682	BC028166	NDUFAF6	366
137695	BC020835	TMEM68	408
137964	BC051377	GPAT4	1371
137994	BC029541	LETM2	735
138046	BC031090	RALYL	876
138050	BC012452	HGSNAT	621
138065	BC013036	RNF183	579
1381	BC022069	CRABP1	414
1382	BC001109	CRABP2	417
138311	BC032097	DIPK1B	1296
138428	BC047012	PTRH1	645
138429	BC042184	PIP5KL1	576
1385	BC010636	CREB1	1026
1386	BC026175	ATF2	630
138716	BC032136	RPP25L	492
1388	BC008394	ATF6B	957
139170	BC035674	DCAF12L1	1392
1392	BC011031	CRH	591
139212	BC033510	PIH1D3	645
1393	BC018038	CRHBP	969
139341	BC035015	FUNDC1	468
139596	BC015116	UPRT	930
1396	BC002738	CRIP1	234
139628	BC012934	FOXR2	936
1397	BC000434	CRIP2	627
139728	BC033746	PNCK	366
139741	BC014597	ACTRT1	1131
1398	BC008506	CRK	915
14	BC014122	AAMP	1167
140	BC041707	ADORA3	627
140290	BC033855	TCP10L	648
140459	BC065913	ASB6	1266
140461	BC001321	ASB8	867
140462	BC013172	ASB9	885
140465	BC014400	MYL6B	627
140545	BC028120	RNF32	771
140576	BC010541	S100A16	312
1406	BC016664	CRX	900
140606	BC013421	SELENOM	438
140612	BC028416	ZFP28	1050
140625	BC029499	ACTRT2	1131
140680	BC051762	C20orf96	786
140688	BC065370	NOL4L	1197
140689	BC069516	CBLN4	606
1407	BC030519	CRY1	1761
140706	BC032455	CCM2L	462
140735	BC010744	DYNLL2	270
140738	BC046362	TMEM37	312
140739	BC010549	UBE2F	558
140767	BC023514	NRSN1	588
1408	BC041814	CRY2	1782
1409	BC069528	CRYAA	522
1412	BC006285	CRYBA2	594
1413	BC069404	CRYBA4	591
1414	BC036790	CRYBB1	759
142679	BC035000	DUSP19	654
1427	BC069478	CRYGS	537
1428	BC018061	CRYM	945
142913	BC031631	CFL1P1	336
142937	BC008131		327
1431	BC010106	CS	1401
143241	BC019250	DYDC1	534
143425	BC046367	SYT9	1476
143471	BC025389	PSMA8	729
143630	BC012183	UBQLNL	1398
143662	BC058007	MUC15	1005
143684	BC026013	FAM76B	702
144097	BC056402	SPINDOC	1146
144110	BC035692	TMEM86A	723
144193	BC029146	AMDHD1	1281
1442	BC057768	CSH1	654
144203	BC046190	OVOS2	288
144233	BC053560	BCDIN3D	879
1443	BC022044	CSH2	654
144321	BC029557	GLIPR1L2	762
144453	BC028087	BEST3	807
144577	BC036246	C12orf66	1407
144608	BC038836	C12orf60	738
144699	BC028132	FBXL14	1257
145226	BC025724	RDH12	951
145264	BC040857	SERPINA12	1245
1453	BC015775	CSNK1D	1230
145447	BC034603	ABHD12B	345
145482	BC059364	PTGR2	1056
1455	BC018693	CSNK1G2	1248
145553	BC051382	MDP1	531
145581	BC043165	LRFN5	2160
1457	BC011668	CSNK2A1	1176
145864	BC062320	HAPLN3	1083
1459	BC008812	CSNK2A2	1053
145942	BC029221	TMCO5A	867
145946	BC066292	SPATA8	318
146174	BC027604		276
146225	BC025354	CMTM2	747
146395	BC016460	GSG1L	531
146433	BC029804	IL34	729
146434	BC029899	ZNF597	1275
146456	BC020827	TMED6	723
146540	BC040642	ZNF785	1218
146542	BC018997	ZNF688	831
1466	BC000992	CSRP2	582
146754	BC034225	DNAH2	2619
1468	BC015797	SLC25A10	891
146849	BC029224	CCDC42	729
146894	BC025395	CD300LG	999
147007	BC033113	TMEM199	627
147015	BC015582	DHRS13	984
147111	BC060882	NOTUM	1293
147158	BC073889		1071
147184	BC015365	TMEM99	568
147199	BC069287	SCGB1C1	288
1472	BC065714	CST4	426
1473	BC069514	CST5	429
147372	BC046645	CCBE1	648
147525	BC010538	LINC00526	288
147687	BC025783	ZNF417	1728
147694	BC030788	ZNF548	1602
147699	BC062452	PPM1N	339
147700	BC073841	KLC3	1512
147719	BC034629	LYPD4	636
147804	BC061910	TPM3P9	279
147807	BC014666	ZNF524	795
147837	BC022523	ZNF563	1431
147872	BC029811	CCDC155	1689
1479	BC009792	CSTF3	312
147965	BC034383	FAM98C	609
147990	BC029162		309
148103	BC044615	ZNF599	1656
148156	BC064356	ZNF558	1209
1482	BC025711	NKX2-5	975
148203	BC034499	ZNF738	414
148223	BC018441	C19orf25	357
148254	BC022022	ZNF555	1887
148281	BC044948	SYT6	1278
148327	BC038962	CREB3L4	1188
148479	BC038516	PHF13	903
148581	BC029895	UBE2U	681
1486	BC024007	CTBS	318
148645	BC030279	LINC00337	291
1487	BC053320	CTBP1	1290
148738	BC017926	HJV	603
148753	BC009382	FAM163A	504
148789	BC029564	B3GALNT2	1503
1488	BC037900	CTBP2	1542
148823	BC024174	GCSAML	408
148932	BC026078	MOB3C	651
149233	BC040720	IL23R	684
149466	BC041633	C1orf210	342
149563	BC017946	SRARP	510
149628	BC020822	PYHIN1	738
149685	BC029594	ADIG	357
149708	BC039173	WFDC5	372
149836	BC031676		297
149840	BC035800	SHLD1	618
149986	BC054888	LSM14B	237
150082	BC031059	LCA5L	2013
150094	BC038504	SIK1	2352
150159	BC022079	SLC9B1	657
150160	BC033797	CCT8L2	1674
150165	BC045548	XKR3	1089
150209	BC032485	AIFM3	1797
150274	BC000004	HSCB	708
150275	BC053874	CCDC117	840
150350	BC033895	ENTHD1	1824
150365	BC032248	MEI1	717
150372	BC038241	NFAM1	657
1504	BC005385	CTRB1	792
150483	BC021716	TEKT4	1308
150684	BC022046	COMMD1	573
150737	BC033795	TTC30B	1998
1508	BC010240	CTSB	1020
1509	BC016320	CTSD	1239
1510	BC042537	CTSE	1191
151011	BC020502	SEPTIN10	1365
151056	BC042674	PLB1	1272
1511	BC014460	CTSG	768
151188	BC028741	ARL6IP6	681
151194	BC009462	METTL21A	273
151230	BC010437	KLHL23	1677
1513	BC016058	CTSK	990
151306	BC033625	GPBAR1	993
151393	BC024243	RMDN2	1194
1514	BC012612	CTSL	1002
151516	BC031997	ASPRV1	459
151531	BC033529	UPP2	954
151903	BC020830	CCDC12	501
1520	BC002642	CTSS	996
152006	BC033786	RNF38	1299
152007	BC017918	GLIPR2	273
152028	BC063696		936
152189	BC041390	CMTM8	522
152195	BC015593	NUDT16P1	288
1522	BC042168	CTSZ	912
152217	BC007882	NCBP2AS2	300
152273	BC035364	FGD5	1623
152559	BC031256	PAQR3	876
152687	BC036110	ZNF595	1947
152756	BC022381	FAM218A	474
152789	BC047075	JAKMIP1	1881
152815	BC022989	THAP6	669
152992	BC035655	TRMT44	1236
153328	BC025747	SLC25A48	474
153364	BC038230	MBLAC2	840
153396	BC037287	TMEM161B	1464
1534	BC002976	CYB561	756
153443	BC031222	SRFBP1	1290
153527	BC056668	ZMAT2	600
153579	BC062459	BTNL9	1035
1536	BC032720	CYBB	1713
153657	BC057775	TTC23L	1086
153743	BC066922	PPP1R2B	618
153745	BC025998	FAM71B	1818
153769	BC073914	SH3RF2	663
154043	BC060761	CNKSR3	1668
154075	BC029851	SAMD3	666
154089	BC032958	LINC01312	429
1543	BC023019	CYP1A1	1539
154661	BC022520	RUNDC3B	1164
154807	BC027734	VKORC1L1	531
154865	BC032838	IQUB	1122
155066	BC015899	ATP6V0E2	279
155465	BC058284	AGR3	501
1556	BC041174	CYP2B7P	1134
1559	BC020754	CYP2C9	489
156	BC037963	GRK2	2070
1571	BC067435	CYP2E1	1482
157247	BC024231	MGC27345	288
157556	BC029562	BAALC-AS2	318
157638	BC052957	LRATD2	933
1577	BC033862	CYP3A5	1509
157753	BC030710	TMEM74	918
157807	BC042617	CLVS1	1065
1579	BC022851	CYP4A11	648
157927	BC034752	C9orf62	459
158	BC000253	ADSL	1455
1580	BC017758	CYP4B1	1539
158062	BC062746	LCN6	492
158234	BC057774	TRMT10B	951
1583	BC032329	CYP11A1	1566
158399	BC065738	ZNF483	735
158427	BC035604	TSTD2	1470
158521	BC034320	FMR1NB	768
158787	BC036767	RIBC1	1140
1588	BC035959	CYP19A1	1512
159	BC012356	ADSS	1371
159013	BC025334	CXorf38	960
159091	BC017868	FAM122C	459
159162	BC026077	RBMY2FP	486
159989	BC050325	DEUP1	1071
160140	BC059411	C11orf65	942
160287	BC014340	LDHAL6A	705
160298	BC031612	C11orf42	1002
160419	BC038413	C12orf50	1245
160492	BC037957	LMNTD1	876
160777	BC040553	CCDC60	1653
160851	BC043292	DGKH	3303
160897	BC033906	GPR180	525
1610	BC029057	DAO	1044
161003	BC025760	STOML3	876
161142	BC050401	FAM71D	1203
161198	BC031567	CLEC14A	1341
161753	BC039862	ODF3L1	825
161835	BC045191	FSIP1	1746
161931	BC033491	ADAD2	1752
1620	BC021560	BRINP1	963
162137	BC029861	LOC162137	522
1622	BC062996	DBI	315
162333	BC035021	MARCH10	1974
162387	BC040487	MFSD6L	1761
162394	BC021238	SLFN5	1017
162427	BC049370	RETREG3	1401
162517	BC034782	FBXO39	1329
162655	BC024227	ZNF519	1623
162681	BC036054	C18orf54	1119
1627	BC007281	DBN1	1950
162979	BC019352	ZNF296	1428
162989	BC027930	DEDD2	981
163059	BC047412	ZNF433	1917
163183	BC052573	SYNE4	876
1632	BC000762	ECI1	909
163227	BC035579	ZNF100	1629
1634	BC005322	DCN	1080
163486	BC063877	DENND1B	1281
1635	BC001286	DCTD	537
1638	BC028311	DCT	1560
163882	BC010228	CNST	1851
1641	BC027925	DCX	1083
164127	BC030026	CCDC185	1872
1645	BC015490	AKR1C1	972
164592	BC033499	CCDC116	1842
1646	BC063574	AKR1C2	972
164633	BC051805	CABP7	648
164656	BC039082	TMPRSS6	1386
164684	BC022549	WBP2NL	603
1647	BC011757	GADD45A	498
1649	BC003637	DDIT3	510
1650	BC002594	DDOST	1371
1653	BC012739	DDX1	2094
1654	BC011819	DDX3X	1989
1656	BC065007	DDX6	1452
166647	BC026009	ADGRA3	1146
1667	BC069423	DEFA1	285
166793	BC016477	ZBTB49	747
166979	BC037547	CDC20B	579
1670	BC069690	DEFA5	285
1671	BC069667	DEFA6	303
1672	BC047677	DEFB1	207
1673	BC069285	DEFB4A	195
167359	BC036422	NIM1K	1311
1674	BC032116	DES	1413
167410	BC036467	LIX1	849
1675	BC057807	CFD	762
1676	BC007721	DFFA	996
167681	BC037170	PRSS35	1242
167826	BC051352	OLIG3	819
168090	BC026278	C6orf118	1410
168374	BC040594	ZNF92	1761
168433	BC022038	RNF133	1131
168451	BC053634	THAP5	702
168537	BC027613	GIMAP7	903
1687	BC019689	GSDME	888
169270	BC026190	ZNF596	1497
169693	BC029780	TMEM252	513
169841	BC019228	ZNF169	291
169966	BC028710	TENT5D	1170
169981	BC032490	SPIN3	234
170393	BC030794	C10orf91	438
170463	BC000274	SSBP4	1158
170575	BC040736	GIMAP1	921
170626	BC062680	XAGE3	336
170685	BC050700	NUDT10	495
170692	BC063283	ADAMTS18	3666
170954	BC066644	PPP1R18	1842
171489	BC005382		294
171546	BC016805	SPTSSA	207
171586	BC021196	ABHD3	1230
1717	BC000054	DHCR7	1428
1719	BC000192	DHFR	564
1725	BC000333	DHPS	1110
1736	BC010015	DKC1	1545
1745	BC036189	DLX1	708
1746	BC032558	DLX2	987
1747	BC012361	DLX3	864
1748	BC016145	DLX4	723
1749	BC006226	DLX5	870
1750	BC069363	DLX6	528
1756	BC028720	DMD	1908
1761	BC040847	DMRT1	1122
1762	BC019266	DMWD	1005
177	BC020669	AGER	1215
1773	BC029437	DNASE1	849
1774	BC001561	DNASE1L1	909
1775	BC035205	DNASE1L2	900
1776	BC015831	DNASE1L3	918
1780	BC032945	DYNC1I1	1887
1788	BC043617	DNMT3A	2739
1797	BC071651	DXO	639
18	BC015628	ABAT	1503
1800	BC017023	DPEP1	1236
1801	BC003099	DPH1	1092
1802	BC016956	DPH2	1470
1806	BC008379	DPYD	522
1807	BC034395	DPYS	1560
1809	BC039006	DPYSL3	1713
1810	BC002809	DR1	531
1813	BC021195	DRD2	1332
1820	BC060828	ARID3A	1782
1827	BC002864	RCAN1	594
183	BC011519	AGT	1458
1831	BC018148	TSC22D3	234
1833	BC030958	EPYC	969
1837	BC005300	DTNA	1116
1839	BC033097	HBEGF	627
1841	BC001827	DTYMK	639
1845	BC035701	DUSP3	435
1848	BC003143	DUSP6	1146
1849	BC019107	DUSP7	963
185	BC068494	AGTR1	1080
1854	BC033645	DUT	495
1855	BC050454	DVL1	1335
1861	BC000674	TOR1A	999
1870	BC007609	E2F2	252
1871	BC016847	E2F3	402
1876	BC008348	E2F6	846
1877	BC080524	E4F1	2355
1879	BC038805	EBF1	1776
1880	BC020752	GPR183	1086
1890	BC052211	TYMP	1449
1891	BC017408	ECH1	987
190	BC011564	NR0B1	1413
1902	BC073167	LPAR1	1041
1903	BC060827	S1PR3	1137
1906	BC009720	EDN1	639
1907	BC034393	EDN2	537
1908	BC008876	EDN3	717
1909	BC022511	EDNRA	1284
191	BC011606	AHCY	1299
1912	BC029269	PHC2	972
1915	BC010735	EEF1A1	1389
1917	BC000432	EEF1A2	1392
192669	BC066888	AGO3	690
192683	BC024700	SCAMP5	708
1933	BC067787	EEF1B2	678
1937	BC000384	EEF1G	1314
1942	BC032698	EFNA1	618
1947	BC016649	EFNB1	1041
1948	BC069342	EFNB2	1002
1958	BC073983	EGR1	1632
1959	BC035625	EGR2	1500
196074	BC030997	METTL15	639
1964	BC000793	EIF1AX	435
196410	BC020509	METTL7B	585
196472	BC031221	FAM71C	726
196483	BC010084	EEF2KMT	993
196500	BC035736	PIANP	849
196549	BC021729	EEF1DP3	402
196743	BC032778	PAOX	1536
196951	BC048125	FAM227B	915
197	BC052590	AHSG	1104
197196	BC030801	LINC00311	360
197257	BC047902	LDHD	1524
197259	BC028141	MLKL	792
1974	BC013708	EIF4A2	1224
1975	BC073139	EIF4B	1836
1977	BC012611	EIF4E	654
1979	BC005057	EIF4EBP2	363
1983	BC032866	EIF5	1296
1993	BC030692	ELAVL2	1041
1996	BC036071	ELAVL4	1101
1997	BC030507	ELF1	1860
199704	BC063820	ZNF585A	2310
199720	BC035008	GGN	1959
199745	BC072416	THAP8	825
199746	BC021186	U2AF1L4	609
199777	BC007116	ZNF626	279
1998	BC065025	ELF2	1374
1999	BC003569	ELF3	1116
199964	BC029775	TMEM61	633
2000	BC017194	ELF4	1992
200014	BC016880	CC2D1B	1599
2001	BC029743	ELF5	768
200185	BC057233	KRTCAP2	489
2002	BC056150	ELK1	1287
200316	BC017022	APOBEC3F	1161
2004	BC017371	ELK3	1224
200403	BC022028	VWA3B	1251
200420	BC014492	ALMS1P1	633
2005	BC063676	ELK4	1218
200728	BC047439	TMEM17	597
200845	BC022893	KCTD6	714
201158	BC011952	TVP23C	831
201163	BC015687	FLCN	1029
2012	BC047300	EMP1	474
201254	BC009571	CENPX	192
201255	BC014109	LRRC45	2013
201266	BC035631	SLC39A11	1008
201294	BC067084	UNC13D	3273
2014	BC009718	EMP3	492
201456	BC029579	FBXO15	1305
2015	BC059395	ADGRE1	2466
201562	BC060839	HACD2	765
201595	BC015880	STT3B	678
201798	BC037869	TIGD4	1539
201799	BC060775	TMEM154	552
201895	BC008502	SMIM14	300
201931	BC036301	TMEM192	816
202051	BC050563	SPATA24	567
2023	BC011130	ENO1	1305
202374	BC021666	STK32A	501
202459	BC024224	OSTCP1	360
202500	BC035022	TCTE1	1506
2026	BC002745	ENO2	1305
2027	BC017249	ENO3	1305
202865	BC021251	C7orf33	534
202915	BC026694	TMEM184A	1245
203	BC001116	AK1	585
2030	BC008954	SLC29A1	1371
203054	BC031570	ADCK5	510
203068	BC019924	TUBB	1335
203102	BC026085	ADAM32	2364
203245	BC021580	NAIF1	519
203260	BC018758	CCDC107	852
203286	BC012981	ANKS6	726
203328	BC014601	SUSD3	768
2034	BC051338	EPAS1	2613
203429	BC025725	FAM226A	300
203523	BC065938	ZNF449	384
203569	BC054022	PAGE2	336
2039	BC006318	DMTN	1218
204	BC009405	AK2	720
2040	BC010703	STOM	867
204010	BC058822	RPSAP52	594
204219	BC034970	CERS3	1152
2045	BC027940	EPHA7	840
2046	BC038796	EPHA8	1488
204851	BC036057	HIPK1	2451
2050	BC052804	EPHB4	2964
2052	BC008291	EPHX1	1368
2053	BC007708	EPHX2	1668
205327	BC036456	C2orf69	810
205428	BC037293	DIPK2A	1293
2055	BC007725	CLN8	861
206426	BC028580	PIP5K1P1	1539
2065	BC002706	ERBB3	996
2068	BC008346	ERCC2	1218
207	BC000479	AKT1	1443
2070	BC041063	EYA4	1851
207063	BC032340	DHRSX	993
2077	BC022231	ERF	1647
2078	BC040168	ERG	1440
2079	BC014301	ERH	315
208	BC063421	AKT2	444
2091	BC019260	FBL	966
2098	BC001169	ESD	849
21	BC062779	ABCA3	630
2100	BC024181	ESR2	972
2104	BC064700	ESRRG	1329
2108	BC015526	ETFA	1002
211	BC011798	ALAS1	1923
2113	BC017314	ETS1	819
2114	BC042954	ETS2	1410
2118	BC007242	ETV4	624
2119	BC007333	ETV5	1533
2120	BC043399	ETV6	1359
2139	BC008803	EYA2	1545
2140	BC041667	EYA3	1611
2145	BC015882	EZH1	2244
2146	BC010858	EZH2	2256
2152	BC011029	F3	888
2157	BC022513	F8	651
2159	BC046125	F10	1467
216	BC001505	ALDH1A1	1506
2167	BC003672	FABP4	399
2168	BC032801	FABP1	384
2170	BC007021	FABP3	402
2172	BC022489	FABP6	387
2176	BC015748	FANCC	1677
2177	BC013582	FANCD2	726
218	BC008892	ALDH3A1	1362
2184	BC002527	FAH	1260
2185	BC042599	PTK2B	3030
2191	BC026250	FAP	2283
219333	BC026072	USP12	1113
2194	BC007909	FASN	1320
219557	BC028365	TEX47	762
219670	BC026165	ENKUR	771
219790	BC025765	RTKN2	492
219833	BC025756	C11orf45	438
219855	BC051314	SLC37A2	1518
219928	BC016964		1032
219938	BC058039	SPATA19	504
219970	BC016789	GLYATL2	885
220002	BC014045	CYB561A3	729
220082	BC027609	SPERT	1239
220108	BC051771	FAM124A	1641
220136	BC030606	CFAP53	1200
220323	BC047726	OAF	822
220388	BC044814	CCDC89	1125
2204	BC027953	FCAR	864
2205	BC005912	FCER1A	774
220686	BC020225		1734
2207	BC033872	FCER1G	264
220766	BC014590		882
2209	BC032634	FCGR1A	1125
220972	BC025394	MARCH8	876
221	BC033099	ALDH3B1	1296
221002	BC022548	RASGEF1A	1287
221016	BC022020		1461
221035	BC068557	REEP3	768
221044	BC018068	UCMA	465
221060	BC029034	RPP38-DT	468
221120	BC067257	ALKBH3	513
221143	BC018091	EEF1AKMT1	645
221184	BC053658	CPNE2	1647
2212	BC020823	FCGR2A	951
221241	BC029565	LINC00305	294
2213	BC031992	FCGR2B	933
2214	BC017865	FCGR3A	765
221416	BC032706	C6orf223	672
221421	BC029519	RSPH9	831
221468	BC026012	TMEM217	636
221472	BC062363	FGD2	315
221476	BC035634	PI16	1287
221545	BC016167	C6orf136	519
221687	BC030666	RNF182	744
221718	BC028118	LINC00518	357
222	BC007685	ALDH3B2	1158
222008	BC028404	VSTM2A	732
222068	BC052641	TMED4	684
2222	BC009251	FDFT1	1254
222234	BC029175	FAM185A	435
222389	BC031618	BEND7	1098
2224	BC010004	FDPS	1260
222662	BC028630	LHFPL5	660
222826	BC039349	FAM217A	1527
222962	BC025325	SLC29A4	1551
2232	BC002960	FDXR	1476
2239	BC017166	GPC4	1671
2243	BC020764	FGA	657
2246	BC032697	FGF1	468
2255	BC069561	FGF10	627
225689	BC028034	MAPK15	834
2258	BC034340	FGF13	738
2267	BC007047	FGL1	939
2271	BC003108	FH	1533
2272	BC032336	FHIT	444
2273	BC010998	FHL1	843
2275	BC001351	FHL3	843
22803	BC006417	XRN2	1683
22806	BC032707	IKZF3	1530
22807	BC028936	IKZF2	1503
22808	BC047690	MRAS	399
22818	BC002849	COPZ1	534
22822	BC018929	PHLDA1	780
22823	BC010013	MTF2	1611
22827	BC011979	PUF60	1551
22829	BC032567	NLGN4Y	405
22836	BC041337	RHOBTB3	1836
22846	BC051896	VASH1	1098
22854	BC030220	NTNG1	1317
22858	BC035807	ICK	879
22859	BC019928	ADGRL1	606
22861	BC016965	NLRP1	441
2288	BC001786	FKBP4	1380
22881	BC042173	ANKRD6	2169
22884	BC018044	WDR37	795
22889	BC027182	KHDC4	726
22899	BC036749	ARHGEF15	2526
22907	BC014237	DHX30	1506
22924	BC011557	MAPRE3	846
22926	BC014969	ATF6	609
22928	BC002381	SEPHS2	1347
22932	BC017101	POMZP3	633
22933	BC003547	SIRT2	1059
22934	BC015529	RPIA	714
22943	BC001539	DKK1	801
22954	BC003154	TRIM32	1962
22955	BC021252	SCMH1	1800
22977	BC031562	AKR7A3	996
22979	BC049384	EFR3B	2010
22980	BC000959	TCF25	2031
23034	BC057838	SAMD4A	744
2305	BC006192	FOXM1	2247
23057	BC020998	NMNAT2	909
23059	BC017070	CLUAP1	1206
23063	BC017393	WAPL	1209
2307	BC013408	FOXS1	993
23071	BC005374	ERP44	1221
23080	BC027724	AVL9	1392
23085	BC005065	ERC1	276
23087	BC018337	TRIM35	621
23089	BC050659	PEG10	978
2309	BC021224	FOXO3	2022
231	BC000260	AKR1B1	951
23107	BC064902	MRPS27	1245
23117	BC036263	NPIPB3	2037
23122	BC029035	CLASP2	1296
23125	BC032381	CAMTA2	666
23127	BC035672	COLGALT2	1881
2313	BC001670	FLI1	1359
23136	BC006141	EPB41L3	2598
23144	BC034435	ZC3H3	1008
23155	BC002939	CLCC1	1506
23157	BC009291	SEPTIN6	1305
2316	BC014654	FLNA	2517
23172	BC008999	ABRAXAS2	936
23174	BC007926	ZCCHC14	135
23178	BC063585	PASK	3972
2319	BC003683	FLOT2	1158
23200	BC042180	ATP11B	588
23201	BC052341	FAM168A	708
23208	BC039205	SYT11	1296
23209	BC028425	MLC1	1134
23210	BC066654	JMJD6	1212
23212	BC001811	RRS1	1098
23244	BC009650	PDS5A	1002
23245	BC029272	ASTN2	1323
23254	BC035501	KAZN	984
2326	BC047129	FMO1	1599
2327	BC005894	FMO2	1416
23279	BC009822	NUP160	573
2328	BC032016	FMO3	1599
23281	BC032481	MTUS2	1047
23283	BC028239	CSTF2T	1851
23295	BC050389	MGRN1	1731
23300	BC002701	ATMIN	2004
23301	BC029477	EHBP1	321
23302	BC009975	WSCD1	1728
23308	BC064637	ICOSLG	909
23310	BC011408	NCAPD3	1023
23332	BC032563	CLASP1	450
23334	BC052802	SZT2	1740
23341	BC047363	DNAJC16	2349
23344	BC013880	ESYT1	2952
23347	BC035774	SMCHD1	804
23353	BC013613	SUN1	774
23363	BC061909	OBSL1	186
23367	BC033856	LARP1	852
23373	BC028050	CRTC1	1905
23378	BC001071	RRP8	1371
23386	BC035014	NUDCD3	1086
2339	BC037295	FNTA	645
23390	BC050324	ZDHHC17	1899
23392	BC021127	ECPAS	1560
23397	BC024211	NCAPH	2226
23399	BC009295	CTDNEP1	735
23403	BC021978	FBXO46	1419
23406	BC042970	COTL1	429
23411	BC012499	SIRT1	1668
23413	BC004856	NCS1	573
2342	BC020232	FNTB	1314
23421	BC009929	ITGB3BP	534
23423	BC017495	TMED3	654
23428	BC052250	SLC7A8	1608
23429	BC036459	RYBP	687
23432	BC028163	GPR161	1590
23435	BC071657	TARDBP	1245
23436	BC005216	CELA3B	813
23450	BC000463	SF3B3	1200
23457	BC017348	ABCB9	1791
23462	BC001873	HEY1	915
23464	BC014457	GCAT	1260
23466	BC064900	CBX6	1239
23474	BC008250	ETHE1	765
23475	BC018910	QPRT	894
23478	BC014508	SEC11A	540
23479	BC011906	ISCU	504
23480	BC009480	SEC61G	207
23492	BC051773	CBX7	756
23493	BC007707	HEY2	1014
23498	BC029510	HAAO	861
23500	BC078153	DAAM2	399
23509	BC000582	POFUT1	585
23521	BC070223	RPL13A	612
23528	BC060820	ZNF281	2688
2353	BC004490	FOS	1143
23530	BC032370	NNT	624
23531	BC026324	MMD	717
23532	BC022008	PRAME	1530
23542	BC009940	MAPK8IP2	1332
23543	BC025281	RBFOX2	1143
23548	BC015701	TTC33	789
23549	BC000653	DNPEP	1428
2355	BC022791	FOSL2	981
23552	BC002655	CDK20	828
23554	BC031265	TSPAN12	918
23555	BC003157	TSPAN15	885
23558	BC010616	WBP2	786
23559	BC010012	WBP1	810
23562	BC012126	CLDN14	720
23564	BC001435	DDAH2	858
2357	BC005315	FPR1	1053
23580	BC002774	CDC42EP4	1071
23581	BC069541	CASP14	729
23582	BC009689	CCNDBP1	1083
23583	BC000417	SMUG1	534
23584	BC007313	VSIG2	984
23585	BC007341	TMEM50A	474
23587	BC002762	ELP5	903
23588	BC024192	KLHDC2	1221
23589	BC003366	CARHSP1	444
23593	BC010290	HEBP2	618
23600	BC009471	AMACR	597
23603	BC002342	CORO1C	1425
23609	BC015715	MKRN2	1251
23612	BC014390	PHLDA3	384
23616	BC008282	SH3BP1	1866
23623	BC001045	RUSC1	1302
23624	BC028915	CBLC	1425
23625	BC023991	FAM89B	489
23627	BC043644	PRND	531
23630	BC035330	KCNE5	429
23632	BC034412	CA14	1014
23635	BC017020	SSBP2	1086
23636	BC050717	NUP62	1569
23640	BC001236	HSPBP1	1089
23646	BC036327	PLD3	1473
23648	BC003605	SSBP3	1107
23650	BC017352	TRIM29	1767
23658	BC005938	LSM5	276
23659	BC011640	PLA2G15	819
23660	BC030790	ZKSCAN5	2520
23682	BC015808	RAB38	636
23704	BC014429	KCNE4	513
23708	BC036077	GSPT2	1887
23729	BC020543	SHPK	1437
23741	BC007944	EID1	564
23743	BC020665	BHMT2	1092
23760	BC031427	PITPNB	819
23787	BC040659	MTCH1	1092
23788	BC000875	MTCH2	912
2395	BC048097	FXN	633
24139	BC032630	EML2	1284
24140	BC023584	FTSJ1	990
24141	BC050727	LAMP5	843
24144	BC011599	TFIP11	2514
24146	BC010160	CLDN15	387
242	BC041058	ALOX12B	2106
244	BC008813		831
2444	BC012916	FRK	1518
245802	BC069322	MS4A6E	444
245806	BC069316	VGLL2	432
245932	BC062212	DEFB119	255
246184	BC066300	CDC26	258
246330	BC021256	PELI3	996
247	BC063647	ALOX15B	2031
2495	BC066341	FTH1	552
2512	BC016715	FTL	528
2516	BC032501	NR5A1	1386
2519	BC003060	FUCA2	1404
2520	BC069724	GAST	306
2528	BC061700	FUT6	1080
252839	BC001106	TMEM9	552
252969	BC013952	NEIL2	999
252995	BC062297	FNDC5	462
253143	BC040859	PRR14L	909
2532	BC017817	ACKR1	1011
2534	BC032496	FYN	1449
253461	BC008901	ZBTB38	981
2537	BC024289	IFI6	1416
253827	BC040053	MSRB3	558
2539	BC000337	G6PD	1548
253980	BC036228	KCTD13	990
254013	BC039535	ETFBKMT	789
254122	BC040981	SNX32	1212
2542	BC015650	SLC37A4	1290
254228	BC032556	CALHM5	930
254251	BC037322	LCORL	957
254263	BC047953	CNIH2	483
254268	BC030647	AKNAD1	1248
254295	BC053853	PHYHD1	876
254528	BC029829	MEIOB	597
254827	BC057243	NAALADL2	963
254863	BC030270	TMEM256	342
254896	BC005043	LOC254896	468
255193	BC029585	CSNK1G2-AS1	729
2553	BC050702	GABPB1	1188
255330	BC042038	NUP210P1	411
255394	BC033617	TCP11L2	1560
255403	BC052600	ZNF718	291
255426	BC057759	RASGEF1C	717
255488	BC063311	RNF144B	909
2556	BC028629	GABRA3	1479
255758	BC021177	TCTEX1D2	429
2558	BC011403	GABRA5	1389
255877	BC059404	BCL6B	1443
2560	BC022449	GABRB1	1425
256051	BC060863	ZNF549	1923
256130	BC030104	TMEM196	270
2562	BC010641	GABRB3	1422
256227	BC066301	STEAP1B	738
2563	BC033801	GABRD	1359
256302	BC029527	NATD1	342
256356	BC032470	GK5	906
256369	BC021728	CCDC197	423
256380	BC033286	SCML4	918
2564	BC059376	GABRE	1098
256435	BC059363	ST6GALNAC3	918
256691	BC015417	MAMDC2	699
256957	BC033734	HEATR9	660
257019	BC023560	FRMD3	642
257054	BC031817		663
257062	BC043005	CATSPERD	2175
2571	BC037780	GAD1	1785
257144	BC030506	GCSAM	537
257169	BC033037	C9orf43	1386
257194	BC036771	NEGR1	681
2577	BC024914	GAGE5	354
25771	BC002743	TBC1D22A	1320
25776	BC016139	CBY1	381
25778	BC053627	DSTYK	2655
25796	BC014006	PGLS	777
25797	BC047756	QPCT	1086
25798	BC018737	BRI3	378
2580	BC008668	GAK	1251
25800	BC039498	SLC39A6	1302
25803	BC021299	SPDEF	1008
25805	BC019252	BAMBI	783
25806	BC006336	VAX2	873
25809	BC014968	TTLL1	1272
25813	BC007830	SAMM50	1407
25816	BC007014	TNFAIP8	597
25822	BC012115	DNAJB5	1161
25827	BC031556	FBXL2	1272
25830	BC022459	SULT4A1	855
25836	BC033847	NIPBL	528
25839	BC006306	COG4	1602
25840	BC008180	METTL7A	735
25842	BC010878	ASF1A	615
25843	BC005237	MOB4	678
25849	BC013294	PARM1	933
2585	BC005141	GALK2	1377
25850	BC032863	ZNF345	1467
25852	BC013424	ARMC8	1158
25855	BC009834	BRMS1	741
25862	BC014176	USP49	1923
25864	BC002571	ABHD14A	816
25870	BC015600	SUMF2	933
25871	BC067743	NEPRO	1704
25876	BC022476	SPEF1	489
2588	BC050684	GALNS	1569
25880	BC015912	TMEM186	642
25888	BC018612	ZNF473	2616
25895	BC016395	EEF1AKMT3	681
25898	BC031057	RCHY1	513
259	BC041593	AMBP	1059
25900	BC004384	IFFO1	603
25902	BC017477	MTHFD1L	2202
25906	BC005156	ANAPC15	366
2591	BC056246	GALNT3	426
25911	BC031695	DPCD	612
25912	BC008306	C1orf43	570
25915	BC002873	NDUFAF3	555
259197	BC052582	NCR3	606
259232	BC064343	NALCN	657
259240	BC069295	WFDC9	270
25932	BC012444	CLIC4	762
25934	BC005935	NIPSNAP3A	744
25936	BC007067	NSL1	846
25937	BC014052	WWTR1	1203
25941	BC022199	TPGS2	504
25942	BC066364	SIN3A	471
25949	BC010862	SYF2	732
25953	BC036457	PNKD	1158
25956	BC044569	SEC31B	1047
2596	BC007936	GAP43	717
25961	BC046173	NUDT13	792
25962	BC053875	VIRMA	1971
25963	BC005335	TMEM87A	546
25966	BC062323	C2CD2	1167
25970	BC010704	SH2B1	1281
25972	BC017019	UNC50	780
25973	BC007956	PARS2	1428
25974	BC006122	MMACHC	678
25975	BC038587	EGFL6	1662
25977	BC002888	NECAP1	402
25979	BC009679	DHRS7B	978
25980	BC001751	AAR2	1155
25983	BC030817	NGDN	948
25988	BC012856	HINFP	1554
25989	BC056423	ULK3	645
26003	BC007770	GORASP2	1359
26010	BC018736	SPATS2L	1467
26022	BC000526	TMEM98	681
26027	BC001517	ACOT11	666
260293	BC028102	CYP4X1	1530
260294	BC007488	NSUN5P2	606
26039	BC068993	SS18L1	1200
26040	BC062338	SETBP1	729
26061	BC007440	HACL1	360
26063	BC010740	DECR2	879
26070	BC021187	DKFZP434K028	390
26074	BC028708	CFAP61	3714
26084	BC016628	ARHGEF26	906
26085	BC069334	KLK13	834
26086	BC017353	GPSM1	1305
26088	BC044629	GGA1	1659
26090	BC014049	ABHD12	1215
26093	BC002787	CCDC9	1596
26094	BC018979	DCAF4	1488
26098	BC016903	EDRF1	1695
26099	BC065538	SZRD1	402
26100	BC007596	WIPI2	1311
26112	BC016647	CCDC69	609
26118	BC021110	WSB1	1266
26119	BC029770	LDLRAP1	792
26123	BC068449	TCTN3	1824
26127	BC032143	FGFR1OP2	519
26128	BC012180	KIF1BP	1866
26133	BC013144	TRPC4AP	2394
26135	BC026916	SERBP1	1227
26137	BC029041	ZBTB20	2007
26146	BC059174	TRAF3IP1	1878
26147	BC022374	PHF19	624
26153	BC009415	KIF26A	612
26155	BC003555	NOC2L	2250
26157	BC013934	GIMAP2	1014
26190	BC018738	FBXW2	1365
26191	BC017785	PTPN22	540
26206	BC019247	SPAG8	1506
26229	BC007906	B3GAT3	1008
2623	BC009797	GATA1	1008
26231	BC018785	LRRC29	672
26232	BC025233	FBXO2	891
26238	BC027853	LINC01558	174
2624	BC018988	GATA2	1401
26240	BC001261	FAM50B	978
26249	BC034035	KLHL3	906
2625	BC006793	GATA3	1335
26253	BC000715	CLEC4E	660
26258	BC004819	BLOC1S6	519
26260	BC020249	FBXO25	876
26262	BC010405	TSPAN17	792
26263	BC041691	FBXO22	1212
26268	BC000650	FBXO9	1212
26269	BC040456	FBXO8	837
26270	BC020880	FBXO6	882
26271	BC018905	FBXO5	1344
26272	BC048098	FBXO4	1164
26273	BC046110	FBXO3	1416
26275	BC005190	HIBCH	1002
26279	BC025706	PLA2G2D	438
2628	BC004141	GATM	1272
26284	BC019094	ERAL1	1314
2629	BC000349	GBA	1080
26291	BC018404	FGF21	630
26292	BC008686	MYCBP	312
26297	BC065375	SERGEF	1377
26298	BC038995	EHF	903
26353	BC002673	HSPB8	591
2639	BC002579	GCDH	1317
26470	BC000567	SEZ6L2	2430
26471	BC002434	NUPR1	249
26502	BC000438	NARF	1509
26508	BC006087	HEYL	987
26515	BC011014	TIMM10B	312
26520	BC020213	TIMM9	270
26526	BC029908	TSPAN16	483
26528	BC012062	DAZAP1	1224
2653	BC009065	GCSH	297
26575	BC013117	RGS17	633
26577	BC006265	PCOLCE2	831
26578	BC007459	OSTF1	654
26579	BC011815	MYEOV	942
26580	BC009866	BSCL2	1395
26589	BC017883	MRPL46	840
2664	BC012201	GDI1	1344
2668	BC069369	GDNF	636
2669	BC022010	GEM	891
2670	BC013596	GFAP	1299
2674	BC014962	GFRA1	1383
26747	BC017745	NUFIP1	831
26749	BC018052	GAGE2E	351
2675	BC041688	GFRA2	1395
26751	BC030778	SH3YL1	345
26762	BC013325	HAVCR1	1095
2689	BC020760	GH2	654
2694	BC037958	CBLIF	1254
2695	BC069663	GIP	462
26984	BC007122	SEC22A	924
26995	BC001457	TRUB2	996
27000	BC056682	DNAJC2	504
27004	BC041075	TCL6	426
27010	BC068460	TPK1	732
27013	BC012821	CNPPD1	1233
27018	BC003190	BEX3	336
2702	BC013313	GJA5	1077
27032	BC028139	ATP2C1	2667
27033	BC017700	ZBTB32	909
27037	BC013352	TRMT2A	1878
27040	BC011563	LAT	702
2705	BC002805	GJB1	852
2706	BC017048	GJB2	681
27063	BC018667	ANKRD1	960
27065	BC001745	NSG1	558
27067	BC008369	STAU2	1617
2707	BC012918	GJB3	813
27079	BC016967	RPUSD2	1536
27086	BC005055	FOXP1	345
2709	BC004379	GJB5	822
27095	BC007662	TRAPPC3	543
27097	BC041094	TAF5L	978
27098	BC025381	CLUL1	1401
2710	BC042421	GK	1593
27120	BC030581	DKKL1	729
27122	BC007660	DKK3	1053
27125	BC063007	AFF4	1062
27128	BC017780	CYTH4	357
27129	BC006319	HSPB7	513
2713	BC066960	GK3P	1662
27130	BC006370	INVS	306
27141	BC035970	CIDEB	660
27152	BC051698	INTU	1227
27158	BC015735	NDOR1	1794
27161	BC018727	AGO2	1758
27163	BC011854	NAAA	600
27166	BC013733	PRELID1	660
2717	BC002689	GLA	1288
27173	BC007886	SLC39A1	975
27175	BC009670	TUBG2	1356
27178	BC020637	IL37	657
27180	BC035365	SIGLEC9	1320
27183	BC047932	VPS4A	1314
27201	BC057778	GPR78	1092
27232	BC032627	GNMT	888
27233	BC058861	SULT1C4	309
27237	BC051838	ARHGEF16	1266
27238	BC000397	GPKOW	1431
27239	BC002353	GPR162	915
27241	BC032715	BBS9	933
27242	BC017730	TNFRSF21	1968
27245	BC014394	AHDC1	1200
27248	BC022228	ERLEC1	1290
27249	BC000932	MMADHC	891
27252	BC005253	KLHL20	693
27257	BC001767	LSM1	402
27283	BC070278	TINAG	1431
27285	BC035620	TEKT2	1293
27286	BC020733	SRPX2	1398
27289	BC026356	RND1	699
27291	BC047908	R3HCC1L	555
27292	BC002841	DIMT1	828
27294	BC032730	DHDH	1005
27295	BC027870	PDLIM3	951
27296	BC036785	TP53TG5	873
27297	BC040107	CRCP	348
2730	BC041809	GCLM	825
27300	BC067271	ZNF544	2148
27306	BC020734	HPGDS	600
27315	BC009930	PGAP2	753
27335	BC001031	EIF3K	657
27336	BC009896	HTATSF1	2268
27338	BC007554	UBE2S	669
27342	BC015330	RABGEF1	1476
27343	BC003548	POLL	897
27348	BC015578	TOR1B	1011
27350	BC011739	APOBEC3C	573
2739	BC011365	GLO1	555
2742	BC032864	GLRA2	1359
27430	BC005218	MAT2B	972
27436	BC008685	EML4	189
27445	BC001304	PCLO	126
2745	BC010965	GLRX	321
275	BC007546	AMT	870
2752	BC011852	GLUL	1122
276	BC063129	AMY1A	1536
2760	BC009273	GM2A	582
2762	BC000117	GMDS	1119
2764	BC005359	GMFB	465
2766	BC008281	GMPR	1038
2767	BC001528	GNA11	513
2774	BC050021	GNAL	1377
2775	BC030027	GNAO1	909
2776	BC057777	GNAQ	1080
2778	BC008855	GNAS	1188
2780	BC000233	GNAT2	1065
2781	BC078163	GNAZ	1068
2782	BC008991	GNB1	1023
2783	BC012348	GNB2	1023
2784	BC015920	GNB3	894
2786	BC022485	GNG4	228
2790	BC010384	GNG10	207
2792	BC029367	GNGT1	225
280	BC020861	AMY2B	1536
2801	BC069268	GOLGA2	2973
2803	BC050444	GOLGA4	501
2806	BC000525	GOT2	1293
280636	BC021122	SELENOH	369
2810	BC001550	SFN	651
2819	BC032234	GPD1	1050
2822	BC020748	GPLD1	531
28227	BC011180	PPP2R3B	678
2823	BC044612	GPM6A	837
2824	BC047295	GPM6B	918
2827	BC032702	GPR3	993
2828	BC067536	GPR4	1089
282966	BC028127	C10orf53	474
282974	BC015792	STK32C	1110
28299	BC034146	IGKV1-5	711
282991	BC020494	BLOC1S2	300
283	BC062698	ANG	444
283078	BC036207	MKX	1059
283130	BC036869	SLC25A45	741
283209	BC059360	PGM2L1	1869
283229	BC033196	CRACR2B	885
283232	BC008671	TMEM80	372
283237	BC053665	TTC9C	516
283238	BC034394	SLC22A24	969
2833	BC034403	CXCR3	1107
283377	BC020844	SPRYD4	624
283385	BC057760	MORN3	723
283471	BC048112	TMPRSS12	1047
283518	BC032343	KCNRG	819
283537	BC060850	SLC46A3	1392
283635	BC029559	FAM177A1	642
283638	BC047913	CEP170B	465
283643	BC016028	TEDC1	747
283650	BC005951	MGC27165	1503
283748	BC034571	PLA2G4D	651
283870	BC039154	BRICD5	687
283899	BC047712	INO80E	735
283971	BC039068	CLEC18C	906
283989	BC047793	TSEN54	1581
2840	BC031653	GPR17	1020
284004	BC035561	HEXD	1482
284058	BC006271	KANSL1	1452
284069	BC030200	FAM171A2	246
284076	BC033563	TTLL6	1710
284099	BC034672	C17orf78	828
284129	BC035900	SLC26A11	1770
284273	BC078661	ZADH2	1134
284338	BC063021	PRR19	708
284348	BC057816	LYPD5	750
284352	BC039061	PPP1R37	657
284403	BC017261	WDR62	1893
284406	BC032577	ZFP82	1599
284418	BC031875	FAM71E2	603
284427	BC031671	SLC25A41	756
284459	BC017256	ZNF875	1980
2846	BC069996	LPAR4	1113
284716	BC039737	RIMKLA	1053
284912	BC001801	LOC284912	243
284942	BC019348	RPL23AP82	192
285074	BC069048	LOC285074	297
[truncated: 3,746 more rows]
