# Supplementary material for: A Live Cell Protein Complementation Assay for ORFeome-Wide Probing of Human HOX Interactomes
Source: Cells. 2023 Jan 3;12(1):200. doi: 10.3390/cells12010200 (PMC9818449; doi:10.3390/cells12010200)
Supplement: Supplementary file 1 [file cells-12-00200-s001.zip › Table S3.xlsx]

## Sheet: Feuil1
Supplementary Table S3. List of the 5005 CC-ORFs present in the HEK cell lines 1 and 2.
ENTREZ_ID	id	Symbol	Official_sym	ORF_size	TF_stat	DbTF_stat	DBD	CC-HEK1	CC-HEK2	A1_2017	LOG2FC_A1-1	Present_A1_1	A1_New	LOG2FC_A1_2	Present A1_2	A1_Present	LOG2FC_MAX_A1	A2_2017	LOG2FC_A2-1	Present_A2_1	A2_New	LOG2FC_A2_2	Present A2_2	A2_Present	LOG2FC_MAX_A2	C6_2017	LOG2FC_C6-1	Present_C6-1	C6_New	LOG2FC_C6-2	Present_C6-2	C6_Presenr	LOG2FC_MAX_C6	A7_2017	LOG2FC_A7-1	Present_A7_1	A7_New	LOG2FC_A7_2	Present A7_2	A7_Present	LOG2FC_MAX_A7	C8_2017	LOG2FC_C8-1	Present_C8-1	C8_New	LOG2FC_C8-2	Present_C8-2	C8_Presenr	LOG2FC_MAX_C8
57007	BC036661	CMKOR1	ACKR3	1089	0	0	*	3670	7265	9124	1.31389	0	10304	0.50417	0	0	0	5425	0.563843	0	7270	0.000992566	0	0	0	1730	-1.08501	0	26105	1.84529	1	1	0	10495	1.51585	1	11	0	0	1	0	0	0	0	33187	2.19158	1	1	0
28971	BC002752	PTD015	AAMDC	369	0	0	*	6563	9238	0	0	0	23863	1.36912	0	0	0	17205	1.3904	0	2778	-1.73353	0	0	0	3175	-1.0476	0	76	0	0	0	0	0	0	0	6229	-0.56858	0	0	0	0	0	0	0	0	0	0	0
14	BC014122	AAMP	AAMP	1167	0	0	*	2741	1052	0	0	0	0	0	0	0	0	0	0	0	0	0	0	0	0	0	0	0	0	0	0	0	0	0	0	0	2850	1.43783	0	0	0	0	0	0	0	0	0	0	0
60	BC016045	ACTB	ACTB	1128	0	0	*	4989	1448	40	0	0	0	0	0	0	0	0	0	0	0	0	0	0	0	1	0	0	5923	2.03227	1	1	0	1358	-1.87727	0	4837	1.74005	1	1	0	0	0	0	2783	0.942579	0	0	0
60496	BC015470	AASDHPPT	AASDHPPT	930	0	0	*	372	50	0	0	0	0	0	0	0	0	2795	2.90947	1	0	0	0	1	0	0	0	0	0	0	0	0	0	0	0	0	1816	5.18269	1	1	0	0	0	0	0	0	0	0	0
18	BC015628	ABAT	ABAT	1503	0	0	*	1559	465	0	0	0	0	0	0	0	0	3123	1.00231	0	4970	3.41794	1	1	0	0	0	0	0	0	0	0	0	0	0	0	0	0	0	0	0	0	0	0	0	0	0	0	0
21	BC062779	ABCA3	ABCA3	630	0	0	*	3088	4922	13208	2.09667	1	0	0	0	1	0	0	0	0	0	0	0	0	0	0	0	0	0	0	0	0	0	0	0	0	0	0	0	0	0	6	0	0	11118	1.17558	0	0	0
23457	BC017348	ABCB9	ABCB9	1791	0	0	*	4118	5087	0	0	0	0	0	0	0	0	712	-2.53199	0	0	0	0	0	0	604	-2.76932	0	0	0	0	0	0	0	0	0	0	0	0	0	0	0	0	0	0	0	0	0	0
85320	BC039085	ABCC11	ABCC11	1662	0	0	*	363	200	0	0	0	0	0	0	0	0	0	0	0	1636	3.0321	1	1	0	0	0	0	0	0	0	0	0	0	0	0	0	0	0	0	0	0	0	0	1205	2.59096	1	1	0
10257	BC041560	ABCC4	ABCC4	2580	0	0	*	2004	2403	2944	0.554895	0	0	0	0	0	0	110	0	0	787	-1.6104	0	0	0	255	0	0	0	0	0	0	0	1326	-0.595802	0	3532	0.555649	0	0	0	0	0	0	0	0	0	0	0
5825	BC068509	ABCD3	ABCD3	1650	0	0	*	226	943	0	0	0	0	0	0	0	0	0	0	0	0	0	0	0	0	0	0	0	1849	0.971416	0	0	0	0	0	0	4954	2.39326	1	1	0	0	0	0	0	0	0	0	0
3939	BC067223	LDHA	LDHA	999	0	0	*	50	1710	3670	6.19771	1	0	0	0	1	6.19771	0	0	0	0	0	0	0	0	3	0	0	9177	2.42403	1	1	0	0	0	0	31	0	0	0	0	0	0	0	0	0	0	0	0
55347	BC014516	ABHD10	ABHD10	921	0	0	*	835	375	0	0	0	0	0	0	0	0	0	0	0	3874	3.36886	1	1	0	0	0	0	0	0	0	0	0	0	0	0	0	0	0	0	0	0	0	0	0	0	0	0	0
83451	BC008251	ABHD11	ABHD11	399	0	0	*	139	605	0	0	0	0	0	0	0	0	0	0	0	0	0	0	0	0	0	0	0	0	0	0	0	0	0	0	0	0	0	0	0	0	0	0	0	0	0	0	0	0
145447	BC034603	C14orf29	ABHD12B	345	0	0	*	2896	1844	3841	0.40742	0	0	0	0	0	0	0	0	0	0	0	0	0	0	0	0	0	0	0	0	0	0	0	0	0	0	0	0	0	0	0	0	0	0	0	0	0	0
84945	BC022566	C13orf6	ABHD13	606	0	0	*	1330	637	0	0	0	0	0	0	0	0	0	0	0	0	0	0	0	0	0	0	0	0	0	0	0	0	0	0	0	0	0	0	0	0	0	0	0	0	0	0	0	0
25864	BC002571	ABHD14A	ABHD14A	816	0	0	*	70	737	0	0	0	0	0	0	0	0	4110	5.87564	1	0	0	0	1	0	0	0	0	0	0	0	0	0	0	0	0	0	0	0	0	0	0	0	0	0	0	0	0	0
84836	BC007234	MGC15429	ABHD14B	633	0	0	*	4157	3146	4484	0.109244	0	2571	-0.291189	0	0	0	0	0	0	0	0	0	0	0	1579	-1.39653	0	244	0	0	0	0	1382	-1.58879	0	10169	1.69259	1	1	0	0	0	0	4583	0.542774	0	0	0
81926	BC020512	C19orf27	ABHD17A	1086	0	0	*	5401	4304	0	0	0	4732	0.136772	0	0	0	11014	1.02804	0	0	0	0	0	0	1674	-1.68993	0	0	0	0	0	0	0	0	0	0	0	0	0	0	183	0	0	0	0	0	0	0
51412	BC020944	ACTL6B	ACTL6B	1281	0	0	*	2184	272	0	0	0	0	0	0	0	0	0	0	0	6097	4.48642	1	1	0	0	0	0	4795	4.13985	1	1	0	0	0	0	0	0	0	0	0	0	0	0	0	0	0	0	0
171586	BC021196	ABHD3	ABHD3	1230	0	0	*	213	240	0	0	0	0	0	0	0	0	0	0	0	0	0	0	0	0	0	0	0	0	0	0	0	0	0	0	0	0	0	0	0	0	0	0	0	14	0	0	0	0
10152	BC001439	ABI2	ABI2	1428	0	0	*	873	4060	1973	1.17634	0	3724	-0.124627	0	0	0	0	0	0	201	0	0	0	0	975	0.159421	0	0	0	0	0	0	0	0	0	6899	0.764908	0	0	0	4067	2.21991	1	55	0	0	1	0
84142	BC039573	FLJ13614	ABRAXAS1	903	0	0	*	5758	10571	0	0	0	6434	-0.716324	0	0	0	8603	0.579272	0	0	0	0	0	0	0	0	0	7613	-0.473575	0	0	0	4368	-0.398595	0	0	0	0	0	0	0	0	0	2478	-2.09286	0	0	0
23172	BC008999	KIAA0157	ABRAXAS2	936	0	0	*	1311	234	0	0	0	0	0	0	0	0	0	0	0	0	0	0	0	0	0	0	0	0	0	0	0	0	0	0	0	0	0	0	0	0	0	0	0	0	0	0	0	0
29777	BC048812	ABT1	ABT1	819	1	0	NA	20114	12165	30294	0.590832	0	14258	0.229035	0	0	0	8548	-1.23454	0	1266	-3.26439	0	0	0	38058	0.92	0	27550	1.17932	0	0	0	6180	-1.70252	0	16389	0.429992	0	0	0	28791	0.517418	0	1468	-3.05081	0	0	0
9507	BC030812	ADAMTS4	ADAMTS4	1020	0	0	*	1382	237	0	0	0	0	0	0	0	0	0	0	0	0	0	0	0	0	0	0	0	8704	5.19872	1	1	0	0	0	0	0	0	0	0	0	2944	1.09102	0	0	0	0	0	0
80724	BC015056	ACAD10	ACAD10	714	0	0	*	3069	2306	25318	3.04432	1	0	0	0	1	0	55	0	0	278	0	0	0	0	0	0	0	144	0	0	0	0	123	0	0	5306	1.20223	0	0	0	0	0	0	415	0	0	0	0
28976	BC007970	ACAD9	ACAD9	1866	0	0	*	675	471	0	0	0	0	0	0	0	0	0	0	0	0	0	0	0	0	0	0	0	0	0	0	0	0	0	0	0	0	0	0	0	0	0	0	0	0	0	0	0	0
34	BC005377	ACADM	ACADM	1266	0	0	*	807	1370	0	0	0	0	0	0	0	0	0	0	0	0	0	0	0	0	0	0	0	1222	-0.164932	0	0	0	0	0	0	0	0	0	0	0	0	0	0	0	0	0	0	0
35	BC025963	ACADS	ACADS	1239	0	0	*	1285	1770	790	-0.701844	0	0	0	0	0	0	0	0	0	0	0	0	0	0	0	0	0	2014	0.186314	0	0	0	0	0	0	2811	0.667334	0	0	0	1131	-0.184169	0	1758	-0.00981429	0	0	0
38	BC010942	ACAT1	ACAT1	489	0	0	*	414	1358	0	0	0	0	0	0	0	0	0	0	0	0	0	0	0	0	0	0	0	0	0	0	0	0	1531	1.88677	1	2012	0.567147	0	1	0	0	0	0	0	0	0	0	0
79777	BC041143	ACBD4	ACBD4	1026	0	0	*	1726	949	0	0	0	5221	2.45985	1	1	0	0	0	0	0	0	0	0	0	0	0	0	0	0	0	0	0	0	0	0	0	0	0	0	0	0	0	0	0	0	0	0	0
91452	BC030555	ACBD5	ACBD5	1473	0	0	*	226	112	0	0	0	0	0	0	0	0	0	0	0	0	0	0	0	0	0	0	0	0	0	0	0	0	0	0	0	0	0	0	0	0	0	0	0	0	0	0	0	0
2532	BC017817	FY	ACKR1	1011	0	0	*	14969	5153	1724	-3.11815	0	0	0	0	0	0	13205	-0.180894	0	17118	1.73203	1	1	0	2217	-2.7553	0	0	0	0	0	0	1959	-2.93379	0	3605	-0.515413	0	0	0	0	0	0	28	0	0	0	0
1238	BC020558	CCBP2	ACKR2	1155	0	0	*	1108	62	0	0	0	0	0	0	0	0	0	0	0	0	0	0	0	0	0	0	0	0	0	0	0	0	0	0	0	207	0	0	0	0	0	0	0	0	0	0	0	0
134637	BC037955	DEADC1	ADAT2	483	0	0	*	50	153	0	0	0	8062	5.71953	1	1	0	0	0	0	0	0	0	0	0	0	0	0	1782	3.54189	1	1	0	2270	5.50462	1	0	0	0	1	0	0	0	0	0	0	0	0	0
26027	BC001517	ACOT11	ACOT11	666	0	0	*	2976	4104	0	0	0	0	0	0	0	0	0	0	0	0	0	0	0	0	3780	0.345012	0	4786	0.22179	0	0	0	2804	-0.0858882	0	4795	0.2245	0	0	0	3926	0.399686	0	3530	-0.217363	0	0	0
11332	BC017365	ACOT7	ACOT7	1017	0	0	*	50	87	45	0	0	0	0	0	0	0	0	0	0	0	0	0	0	0	0	0	0	0	0	0	0	0	5793	6.85624	1	0	0	0	1	6.85624	0	0	0	1675	4.267	1	1	0
8309	BC047700	ACOX2	ACOX2	2046	0	0	*	50	112	0	0	0	92	-0.283793	0	0	0	0	0	0	0	0	0	0	0	0	0	0	0	0	0	0	0	0	0	0	0	0	0	0	0	0	0	0	0	0	0	0	0
51205	BC009965	ACP6	ACP6	1287	0	0	*	2036	3914	3833	0.912736	0	621	-2.65598	0	0	0	4438	1.12417	0	0	0	0	0	0	3278	0.687078	0	125	0	0	0	0	0	0	0	9389	1.26233	0	0	0	33	0	0	25350	2.69527	1	1	0
55	BC016344	ACPP	ACPP	1161	0	0	*	50	409	0	0	0	2855	2.80332	1	1	0	0	0	0	0	0	0	0	0	0	0	0	0	0	0	0	0	1830	5.19377	1	0	0	0	1	0	0	0	0	0	0	0	0	0
80221	BC012053	FLJ20920	ACSF2	1848	0	0	*	368	290	0	0	0	0	0	0	0	0	0	0	0	0	0	0	0	0	0	0	0	0	0	0	0	0	0	0	0	0	0	0	0	0	0	0	0	0	0	0	0	0
54988	BC068516	FLJ20581	ACSM5	1740	0	0	*	4587	4279	5608	0.289935	0	770	-2.47434	0	0	0	110	0	0	0	0	0	0	0	225	0	0	6008	0.489611	0	0	0	0	0	0	11823	1.46625	0	0	0	6	0	0	4278	-0.000337196	0	0	0
59	BC017554	ACTA2	ACTA2	1134	0	0	*	701	1451	0	0	0	0	0	0	0	0	0	0	0	0	0	0	0	0	0	0	0	0	0	0	0	0	0	0	0	0	0	0	0	0	0	0	0	0	0	0	0	0
140	BC041707	ADORA3	ADORA3	627	0	0	*	2651	1430	0	0	0	0	0	0	0	0	0	0	0	0	0	0	0	0	0	0	0	5874	2.03833	1	1	0	0	0	0	305	0	0	0	0	0	0	0	263	0	0	0	0
70	BC009978	ACTC	ACTC1	1134	0	0	*	984	914	0	0	0	3561	1.96202	1	1	0	0	0	0	864	-0.0811629	0	0	0	0	0	0	0	0	0	0	0	0	0	0	4806	2.39457	1	1	0	0	0	0	0	0	0	0	0
11120	BC016661	BTN2A1	BTN2A1	1005	0	0	*	50	1089	7781	7.28188	1	0	0	0	1	7.28188	1205	4.59096	1	0	0	0	1	0	0	0	0	0	0	0	0	0	0	0	0	0	0	0	0	0	0	0	0	0	0	0	0	0
10096	BC044590	ACTR3	ACTR3	1257	0	0	*	50	1227	0	0	0	0	0	0	0	0	0	0	0	0	0	0	0	0	0	0	0	0	0	0	0	0	0	0	0	0	0	0	0	0	0	0	0	0	0	0	0	0
56894	BC004219	AGPAT3	AGPAT3	192	0	0	*	2191	1645	51	0	0	0	0	0	0	0	0	0	0	1682	0.0320901	0	0	0	0	0	0	6488	1.97969	1	1	0	0	0	0	61	0	0	0	0	1702	-0.364358	0	0	0	0	0	0
55860	BC011997	ACTR10	ACTR10	1254	0	0	*	1150	705	0	0	0	0	0	0	0	0	0	0	0	0	0	0	0	0	0	0	0	526	-0.42256	0	0	0	0	0	0	0	0	0	0	0	0	0	0	0	0	0	0	0
10120	BC004374	ACTR1B	ACTR1B	1131	0	0	*	133	53	0	0	0	0	0	0	0	0	0	0	0	2223	5.39037	1	1	0	0	0	0	0	0	0	0	0	70	0	0	0	0	0	0	0	0	0	0	0	0	0	0	0
79026	BC012477	AHNAK	AHNAK	450	0	0	*	3870	1251	0	0	0	0	0	0	0	0	0	0	0	0	0	0	0	0	1709	-1.17918	0	5003	1.99971	1	1	0	164	0	0	9160	2.87227	1	1	0	0	0	0	0	0	0	0	0
139741	BC014597	RP1-203C2.1	ACTRT1	1131	0	0	*	505	1251	0	0	0	0	0	0	0	0	0	0	0	0	0	0	0	0	0	0	0	0	0	0	0	0	0	0	0	0	0	0	0	0	0	0	0	0	0	0	0	0
140625	BC029499	ARPM2	ACTRT2	1131	0	0	*	235	3055	0	0	0	1032	-1.56573	0	0	0	0	0	0	0	0	0	0	0	227	0	0	0	0	0	0	0	1912	3.02435	1	0	0	0	1	0	0	0	0	0	0	0	0	0
95	BC003023	ACY1	ACY1	1227	0	0	*	2183	2840	0	0	0	0	0	0	0	0	0	0	0	1636	-0.795718	0	0	0	359	0	0	0	0	0	0	0	4887	1.16264	0	5550	0.966597	0	0	0	0	0	0	0	0	0	0	0
148789	BC029564	B3GALNT2	B3GALNT2	1503	0	0	*	53	162	3553	6.0669	1	0	0	0	1	6.0669	8384	7.3055	1	0	0	0	1	7.3055	0	0	0	0	0	0	0	0	0	0	0	2551	3.977	1	1	0	591	3.47909	1	166	0	0	1	0
57804	BC001334	POLD4	POLD4	105	0	0	*	50	50	3590	6.16591	1	0	0	0	1	6.16591	0	0	0	154	0	0	0	0	0	0	0	6011	6.90953	1	1	6.90953	0	0	0	0	0	0	0	0	0	0	0	0	0	0	0	0
1646	BC063574	AKR1C2	AKR1C2	972	0	0	*	2021	1598	0	0	0	0	0	0	0	0	0	0	0	0	0	0	0	0	0	0	0	11521	2.84993	1	1	0	0	0	0	2920	0.869701	0	0	0	0	0	0	0	0	0	0	0
80332	BC062663	ADAM33	ADAM33	258	0	0	*	314	421	0	0	0	0	0	0	0	0	0	0	0	0	0	0	0	0	0	0	0	0	0	0	0	0	0	0	0	0	0	0	0	0	0	0	0	0	0	0	0	0
8574	BC010852	AKR7A2	AKR7A2	993	0	0	*	965	821	11785	3.61028	1	0	0	0	1	0	0	0	0	0	0	0	0	0	134	0	0	5428	2.72497	1	1	0	0	0	0	6947	3.08094	1	1	0	0	0	0	789	-0.0573569	0	0	0
92949	BC030262	ADAMTSL1	ADAMTSL1	1320	0	0	*	4204	5059	11	0	0	1181	-2.09884	0	0	0	2356	-0.835423	0	1019	-2.3117	0	0	0	0	0	0	13465	1.41229	0	0	0	6526	0.634436	0	3901	-0.375008	0	0	0	427	0	0	3974	-0.34826	0	0	0
9719	BC050544	ADAMTSL2	ADAMTSL2	2856	0	0	*	4444	521	0	0	0	0	0	0	0	0	0	0	0	0	0	0	0	0	0	0	0	0	0	0	0	0	0	0	0	1671	1.68136	1	1	0	0	0	0	0	0	0	0	0
79087	BC001729	ALG12	ALG12	1467	0	0	*	6185	3686	11	0	0	7519	1.02848	0	0	0	164	0	0	3334	-0.144802	0	0	0	3591	-0.784388	0	14437	1.96964	1	1	0	0	0	0	6606	0.841721	0	0	0	0	0	0	6272	0.766869	0	0	0
203054	BC031570	ADCK5	ADCK5	510	0	0	*	2123	946	0	0	0	0	0	0	0	0	0	0	0	0	0	0	0	0	0	0	0	0	0	0	0	0	0	0	0	14	0	0	0	0	28	0	0	0	0	0	0	0
166647	BC026009	GPR125	ADGRA3	1146	0	0	*	1585	356	419	0	0	0	0	0	0	0	0	0	0	0	0	0	0	0	0	0	0	0	0	0	0	0	0	0	0	0	0	0	0	0	0	0	0	0	0	0	0	0
2015	BC059395	EMR1	ADGRE1	2466	0	0	*	126	69	2360	4.22729	1	0	0	0	1	0	0	0	0	0	0	0	0	0	0	0	0	0	0	0	0	0	4247	5.07495	1	0	0	0	1	0	0	0	0	457	0	0	0	0
130619	BC031585	MGC35338		492	0	0	*	50	50	7610	7.24982	1	0	0	0	1	7.24982	164	0	0	0	0	0	0	0	0	0	0	5354	6.74255	1	1	6.74255	0	0	0	0	0	0	0	0	3	0	0	0	0	0	0	0
128	BC014665	ADH5	ADH5	1125	0	0	*	1227	409	0	0	0	0	0	0	0	0	0	0	0	0	0	0	0	0	0	0	0	9	0	0	0	0	0	0	0	3110	2.92674	1	1	0	0	0	0	0	0	0	0	0
55256	BC001467	MTCBP-1	ADI1	540	0	0	*	2449	393	29	0	0	0	0	0	0	0	0	0	0	0	0	0	0	0	0	0	0	0	0	0	0	0	0	0	0	0	0	0	0	0	0	0	0	941	1.25967	0	0	0
149685	BC029594	SMAF1	ADIG	357	0	0	*	1747	3932	5499	1.65429	1	3526	-0.157231	0	1	0	0	0	0	14016	1.83374	1	1	0	0	0	0	1678	-1.22852	0	0	0	0	0	0	0	0	0	0	0	0	0	0	0	0	0	0	0
51094	BC010743	ADIPOR1	ADIPOR1	1128	0	0	*	2903	1773	19	0	0	2185	0.301441	0	0	0	0	0	0	0	0	0	0	0	0	0	0	64	0	0	0	0	97	0	0	0	0	0	0	0	0	0	0	0	0	0	0	0
79602	BC051858	ADIPOR2	ADIPOR2	1161	0	0	*	900	1548	0	0	0	0	0	0	0	0	0	0	0	0	0	0	0	0	0	0	0	0	0	0	0	0	0	0	0	0	0	0	0	0	0	0	0	0	0	0	0	0
10195	BC002839	ALG3	ALG3	1317	0	0	*	260	69	0	0	0	0	0	0	0	0	0	0	0	0	0	0	0	0	0	0	0	626	3.18149	1	1	0	0	0	0	0	0	0	0	0	0	0	0	0	0	0	0	0
135	BC013780	ADORA2A	ADORA2A	1239	0	0	*	728	237	0	0	0	0	0	0	0	0	0	0	0	0	0	0	0	0	0	0	0	0	0	0	0	0	0	0	0	0	0	0	0	0	1076	0.563668	0	0	0	0	0	0
136	BC025722	ADORA2B	ADORA2B	999	0	0	*	2084	3511	3395	0.704056	0	3497	-0.0057642	0	0	0	0	0	0	8027	1.19298	0	0	0	1696	-0.297219	0	9639	1.457	0	0	0	0	0	0	9895	1.49482	0	0	0	8	0	0	4458	0.344515	0	0	0
29880	BC012531	ALG5	ALG5	975	0	0	*	1166	852	0	0	0	0	0	0	0	0	1808	0.632827	0	309	0	0	0	0	1203	0.0450689	0	4975	2.54577	1	1	0	0	0	0	0	0	0	0	0	0	0	0	4264	2.32328	1	1	0
83440	BC006112	ADPGK	ADPGK	1494	1	0	NA	635	846	0	0	0	21	0	0	0	0	0	0	0	4800	2.5043	1	1	0	0	0	0	0	0	0	0	0	0	0	0	0	0	0	0	0	0	0	0	5995	2.82503	1	1	0
113622	BC009755	ADPRHL1	ADPRHL1	819	0	0	*	5839	4179	2394	-1.2863	0	0	0	0	0	0	986	-2.56606	0	0	0	0	0	0	0	0	0	370	0	0	0	0	0	0	0	310	0	0	0	0	0	0	0	4721	0.175935	0	0	0
11047	BC017245	ADRM1	ADRM1	1224	0	0	*	698	1997	0	0	0	245	-3.02698	0	0	0	0	0	0	0	0	0	0	0	0	0	0	0	0	0	0	0	0	0	0	0	0	0	0	0	0	0	0	0	0	0	0	0
158	BC000253	ADSL	ADSL	1455	0	0	*	95	359	0	0	0	624	0.797562	0	0	0	0	0	0	0	0	0	0	0	0	0	0	0	0	0	0	0	0	0	0	2811	2.96903	1	1	0	0	0	0	0	0	0	0	0
84830	BC007011	C6orf105	ADTRP	693	0	0	*	1457	2091	0	0	0	0	0	0	0	0	0	0	0	0	0	0	0	0	0	0	0	0	0	0	0	0	0	0	0	0	0	0	0	0	6	0	0	5164	1.3043	0	0	0
64782	BC005164	ISG20L1	AEN	984	0	0	*	5425	2943	0	0	0	4	0	0	0	0	0	0	0	9863	1.74474	1	1	0	768	-2.82044	0	1357	-1.11687	0	0	0	5758	0.0859447	0	5443	0.887114	0	0	0	5517	0.0242608	0	983	-1.58202	0	0	0
150209	BC032485	AIFL	AIFM3	1797	0	0	*	50	846	0	0	0	4221	2.31886	1	1	0	0	0	0	0	0	0	0	0	0	0	0	0	0	0	0	0	0	0	0	0	0	0	0	0	0	0	0	0	0	0	0	0
54784	BC002820	FLJ20013	ALKBH4	909	0	0	*	425	412	0	0	0	0	0	0	0	0	0	0	0	170	0	0	0	0	0	0	0	3111	2.91666	1	1	0	0	0	0	1118	1.4402	0	0	0	0	0	0	568	0.463247	0	0	0
3268	BC017329	HRBL	AGFG2	1446	0	0	*	915	100	0	0	0	0	0	0	0	0	0	0	0	0	0	0	0	0	0	0	0	0	0	0	0	0	0	0	0	1073	3.42358	1	1	0	0	0	0	0	0	0	0	0
55109	BC032844	AGGF1	AGGF1	2145	0	0	*	1931	1663	190	0	0	46	0	0	0	0	219	0	0	2115	0.346869	0	0	0	0	0	0	425	0	0	0	0	0	0	0	760	-1.12972	0	0	0	83	0	0	0	0	0	0	0
55750	BC022777	MULK	AGK	1269	0	0	*	2735	293	3919	0.518945	0	0	0	0	0	0	0	0	0	0	0	0	0	0	0	0	0	0	0	0	0	0	0	0	0	143	0	0	0	0	299	0	0	0	0	0	0	0
10554	BC002402	AGPAT1	AGPAT1	852	0	0	*	2404	1626	0	0	0	5686	1.80609	1	1	0	0	0	0	2331	0.519622	0	0	0	0	0	0	3566	1.13298	0	0	0	10683	2.15181	1	0	0	0	1	0	0	0	0	0	0	0	0	0
10555	BC000026	AGPAT2	AGPAT2	837	0	0	*	42850	60900	6594	-2.70007	0	2810	-4.4378	0	0	0	31124	-0.461268	0	32538	-0.904317	0	0	0	5466	-2.97074	0	8338	-2.86867	0	0	0	13422	-1.6747	0	13402	-2.18399	0	0	0	28092	-0.609136	0	10190	-2.57929	0	0	0
9949	BC060813	AMMECR1	AMMECR1	891	0	0	*	50	462	3016	5.91456	1	0	0	0	1	0	55	0	0	0	0	0	0	0	0	0	0	4113	3.15423	1	1	0	0	0	0	0	0	0	0	0	0	0	0	0	0	0	0	0
155465	BC058284	BCMP11	AGR3	501	0	0	*	2016	889	0	0	0	32	0	0	0	0	0	0	0	0	0	0	0	0	1012	-0.994286	0	0	0	0	0	0	3567	0.823216	0	0	0	0	0	0	0	0	0	2395	1.42977	0	0	0
183	BC011519	AGT	AGT	1458	1	0	Unknown	1304	509	0	0	0	0	0	0	0	0	0	0	0	0	0	0	0	0	0	0	0	49	0	0	0	0	0	0	0	0	0	0	0	0	0	0	0	0	0	0	0	0
185	BC068494	AGTR1	AGTR1	1080	0	0	*	1317	1408	0	0	0	14202	3.33437	1	1	0	0	0	0	0	0	0	0	0	0	0	0	0	0	0	0	0	0	0	0	1095	-0.362716	0	0	0	0	0	0	15756	3.48418	1	1	0
191	BC011606	AHCY	AHCY	1299	0	0	*	2546	4769	5435	1.09405	0	21934	2.20141	1	1	0	0	0	0	0	0	0	0	0	2675	0.0713065	0	174	0	0	0	0	7579	1.57378	1	10183	1.0944	0	1	0	28	0	0	1828	-1.38342	0	0	0
27245	BC014394	AHDC1	AHDC1	1200	1	1	AT hook	1727	1451	0	0	0	1440	-0.0109787	0	0	0	0	0	0	3380	1.21998	0	0	0	0	0	0	0	0	0	0	0	0	0	0	0	0	0	0	0	0	0	0	0	0	0	0	0
286	BC007930	ANK1	ANK1	396	0	0	*	1764	1198	0	0	0	7190	2.58536	1	1	0	0	0	0	0	0	0	0	0	0	0	0	4694	1.97019	1	1	0	0	0	0	679	-0.819144	0	0	0	0	0	0	0	0	0	0	0
197	BC052590	AHSG	AHSG	1104	0	0	*	4854	2200	0	0	0	0	0	0	0	0	0	0	0	0	0	0	0	0	2808	-0.789631	0	0	0	0	0	0	0	0	0	20	0	0	0	0	3	0	0	0	0	0	0	0
51327	BC035842	ERAF	AHSP	309	0	0	*	4506	2019	139	0	0	20448	3.34025	1	1	0	8493	0.914427	0	0	0	0	0	0	1630	-1.46698	0	0	0	0	0	0	10190	1.17723	0	1833	-0.139434	0	0	0	749	-2.58881	0	14842	2.87797	1	1	0
55179	BC012478	FAIM	FAIM	540	0	0	*	50	443	6022	6.91217	1	0	0	0	1	6.91217	8438	7.39883	1	0	0	0	1	7.39883	0	0	0	0	0	0	0	0	38	0	0	0	0	0	0	0	0	0	0	0	0	0	0	0
51390	BC025278	AIG1	AIG1	717	0	0	*	636	1058	0	0	0	0	0	0	0	0	0	0	0	123	0	0	0	0	0	0	0	0	0	0	0	0	12	0	0	0	0	0	0	0	0	0	0	623	-0.764036	0	0	0
9255	BC014051	SCYE1	AIMP1	939	0	0	*	50	3093	0	0	0	0	0	0	0	0	2904	5.85997	1	0	0	0	1	0	0	0	0	6760	1.12802	0	0	0	0	0	0	0	0	0	0	0	0	0	0	3710	0.262412	0	0	0
7965	BC013630	JTV1	AIMP2	963	0	0	*	1415	1932	0	0	0	7009	1.85911	1	1	0	0	0	0	5017	1.37673	0	0	0	0	0	0	1284	-0.58945	0	0	0	0	0	0	1274	-0.60073	0	0	0	0	0	0	4043	1.06533	0	0	0
203	BC001116	AK1	AK1	585	0	0	*	2680	4756	0	0	0	0	0	0	0	0	0	0	0	11747	1.30447	0	0	0	4616	0.78441	0	0	0	0	0	0	0	0	0	0	0	0	0	0	0	0	0	0	0	0	0	0
204	BC009405	AK2	AK2	720	0	0	*	1020	746	0	0	0	0	0	0	0	0	1753	0.781257	0	0	0	0	0	0	0	0	0	0	0	0	0	0	0	0	0	0	0	0	0	0	0	0	0	0	0	0	0	0
79934	BC027473	ADCK4	COQ8B	1512	0	0	*	50	109	0	0	0	802	2.87927	1	1	0	4931	6.62381	1	0	0	0	1	6.62381	0	0	0	0	0	0	0	0	0	0	0	0	0	0	0	0	0	0	0	0	0	0	0	0
9465	BC016927	AKAP7	AKAP7	246	0	0	*	890	1220	17740	4.31706	1	0	0	0	1	0	0	0	0	2115	0.793777	0	0	0	0	0	0	0	0	0	0	0	0	0	0	0	0	0	0	0	0	0	0	0	0	0	0	0
56672	BC030996	C11orf17	AKIP1	633	0	0	*	1760	1408	37	0	0	6601	2.22904	1	1	0	0	0	0	0	0	0	0	0	1	0	0	0	0	0	0	0	0	0	0	0	0	0	0	0	0	0	0	6424	2.18982	1	1	0
10327	BC000670	AKR1A1	AKR1A1	978	0	0	*	3668	3836	0	0	0	4	0	0	0	0	0	0	0	15	0	0	0	0	196	0	0	0	0	0	0	0	0	0	0	8140	1.08543	0	0	0	3785	0.0452997	0	0	0	0	0	0
57016	BC008837	AKR1B10	AKR1B10	951	0	0	*	572	106	0	0	0	0	0	0	0	0	0	0	0	0	0	0	0	0	0	0	0	0	0	0	0	0	0	0	0	0	0	0	0	0	0	0	0	0	0	0	0	0
57763	BC012917	ANKRA2	ANKRA2	942	1	0	NA	1230	284	0	0	0	0	0	0	0	0	0	0	0	0	0	0	0	0	0	0	0	14648	5.68867	1	1	0	0	0	0	0	0	0	0	0	0	0	0	5413	4.25247	1	1	0
83592	BC002862	AKR1CL2	AKR1E2	924	0	0	*	5690	1551	0	0	0	0	0	0	0	0	0	0	0	0	0	0	0	0	729	-2.96444	0	0	0	0	0	0	434	0	0	25060	4.01412	1	1	0	2620	-1.11886	0	0	0	0	0	0
203286	BC012981	SAMD6	ANKS6	726	0	0	*	827	50	0	0	0	0	0	0	0	0	0	0	0	0	0	0	0	0	0	0	0	526	3.39506	1	1	0	0	0	0	0	0	0	0	0	0	0	0	291	0	0	0	0
207	BC000479	AKT1	AKT1	1443	1	0	Unknown	637	1408	0	0	0	3898	1.46909	0	0	0	0	0	0	0	0	0	0	0	0	0	0	0	0	0	0	0	0	0	0	0	0	0	0	0	0	0	0	0	0	0	0	0
302	BC052567	ANXA2	ANXA2	1020	0	0	*	4331	2344	0	0	0	0	0	0	0	0	55	0	0	0	0	0	0	0	0	0	0	10519	2.16595	1	1	0	0	0	0	5086	1.11756	0	0	0	0	0	0	0	0	0	0	0
211	BC011798	ALAS1	ALAS1	1923	0	0	*	1284	1326	0	0	0	0	0	0	0	0	0	0	0	0	0	0	0	0	0	0	0	0	0	0	0	0	0	0	0	0	0	0	0	0	0	0	0	0	0	0	0	0
8854	BC030589	ALDH1A2	ALDH1A2	1443	0	0	*	198	3264	0	0	0	0	0	0	0	0	0	0	0	0	0	0	0	0	122	0	0	0	0	0	0	0	0	0	0	0	0	0	0	0	0	0	0	0	0	0	0	0
218	BC008892	ALDH3A1	ALDH3A1	1362	0	0	*	1689	353	0	0	0	2199	2.63911	1	1	0	0	0	0	0	0	0	0	0	0	0	0	0	0	0	0	0	0	0	0	0	0	0	0	0	0	0	0	0	0	0	0	0
80207	BC005059	OPA3	OPA3	540	0	0	*	50	531	6657	7.0568	1	0	0	0	1	7.0568	0	0	0	293	0	0	0	0	0	0	0	0	0	0	0	0	6125	6.93664	1	0	0	0	1	6.93664	0	0	0	4832	3.18584	1	1	0
9179	BC018705	AP4M1	AP4M1	1362	0	0	*	1159	2103	504	-1.20138	0	4774	1.18275	0	0	0	603	-0.942651	0	1667	-0.335195	0	0	0	238	0	0	8652	2.04058	1	1	0	10017	3.1115	1	0	0	0	1	0	0	0	0	32328	3.94226	1	1	0
56052	BC004402	ALG1	ALG1	1395	0	0	*	50	50	0	0	0	0	0	0	0	0	0	0	0	0	0	0	0	0	0	0	0	0	0	0	0	0	0	0	0	0	0	0	0	0	0	0	0	0	0	0	0	0
84920	BC033730	ALG10	ALG10	1422	0	0	*	411	805	0	0	0	0	0	0	0	0	0	0	0	0	0	0	0	0	0	0	0	0	0	0	0	0	0	0	0	0	0	0	0	0	0	0	0	0	0	0	0	0
335	BC005380	APOA1	APOA1	804	0	0	*	959	811	0	0	0	0	0	0	0	0	767	-0.322304	0	0	0	0	0	0	0	0	0	8597	3.40606	1	1	0	0	0	0	0	0	0	0	0	0	0	0	28	0	0	0	0
85365	BC017876	ALG2	ALG2	1251	0	0	*	1825	2774	0	0	0	9222	1.73311	1	1	0	0	0	0	3149	0.182926	0	0	0	0	0	0	92	0	0	0	0	0	0	0	0	0	0	0	0	0	0	0	4306	0.634381	0	0	0
60489	BC024268	APOBEC3G	APOBEC3G	1155	1	0	Unknown	3543	2874	5266	0.571736	0	0	0	0	0	0	0	0	0	15	0	0	0	0	0	0	0	11155	1.95656	1	1	0	1123	-1.65761	0	7061	1.29681	0	0	0	0	0	0	0	0	0	0	0
360	BC013566	AQP3	AQP3	879	0	0	*	2010	1495	0	0	0	2440	0.706736	0	0	0	0	0	0	93	0	0	0	0	0	0	0	4838	1.69427	1	1	0	0	0	0	4116	1.4611	0	0	0	1367	-0.556182	0	5704	1.93183	1	1	0
221120	BC067257	DEPC-1	ALKBH3	513	0	0	*	451	1935	0	0	0	0	0	0	0	0	0	0	0	1868	-0.0508391	0	0	0	0	0	0	4581	1.24333	0	0	0	0	0	0	254	0	0	0	0	0	0	0	0	0	0	0	0
392	BC018118	ARHGAP1	ARHGAP1	1320	0	0	*	1442	331	0	0	0	0	0	0	0	0	603	-1.25784	0	0	0	0	0	0	0	0	0	4877	3.88109	1	1	0	0	0	0	0	0	0	0	0	0	0	0	0	0	0	0	0
200420	BC014492	LOC200420	ALMS1P1	633	0	0	*	1615	468	0	0	0	0	0	0	0	0	0	0	0	0	0	0	0	0	0	0	0	0	0	0	0	0	0	0	0	0	0	0	0	0	0	0	0	0	0	0	0	0
80216	BC060780	ALPK1	ALPK1	3258	0	0	*	955	1333	0	0	0	0	0	0	0	0	0	0	0	0	0	0	0	0	0	0	0	0	0	0	0	0	0	0	0	0	0	0	0	0	0	0	0	0	0	0	0	0
23600	BC009471	AMACR	AMACR	597	0	0	*	3293	2350	0	0	0	0	0	0	0	0	164	0	0	0	0	0	0	0	611	-2.43016	0	0	0	0	0	0	0	0	0	232	0	0	0	0	3663	0.153623	0	0	0	0	0	0
259	BC041593	AMBP	AMBP	1059	0	0	*	2238	1985	0	0	0	0	0	0	0	0	0	0	0	0	0	0	0	0	3835	0.777017	0	4025	1.01985	0	0	0	12563	2.4889	1	539	-1.88078	0	1	0	10968	2.29302	1	0	0	0	1	0
144193	BC029146	MGC35366	AMDHD1	1281	0	0	*	50	312	0	0	0	0	0	0	0	0	0	0	0	602	0.948217	0	0	0	0	0	0	0	0	0	0	0	0	0	0	0	0	0	0	0	0	0	0	0	0	0	0	0
57463	BC040879	AMIGO1	AMIGO1	1482	0	0	*	623	1957	0	0	0	0	0	0	0	0	0	0	0	0	0	0	0	0	446	0	0	0	0	0	0	0	0	0	0	0	0	0	0	0	0	0	0	0	0	0	0	0
57569	BC039340	ARHGAP20	ARHGAP20	2196	0	0	*	979	50	0	0	0	0	0	0	0	0	0	0	0	0	0	0	0	0	0	0	0	2017	5.33414	1	1	0	0	0	0	0	0	0	0	0	0	0	0	0	0	0	0	0
275	BC007546	AMT	AMT	870	0	0	*	2727	2721	0	0	0	0	0	0	0	0	0	0	0	17180	2.65852	1	1	0	4401	0.690517	0	0	0	0	0	0	443	0	0	0	0	0	0	0	0	0	0	9096	1.7411	1	1	0
280	BC020861	AMY2B	AMY2B	1536	0	0	*	2213	1258	10114	2.19228	1	0	0	0	1	0	9096	2.03923	1	0	0	0	1	0	0	0	0	0	0	0	0	0	0	0	0	0	0	0	0	0	0	0	0	0	0	0	0	0
119504	BC009530	C10orf104	ANAPC16	333	0	0	*	4568	11603	13	0	0	10513	-0.142323	0	0	0	16000	1.80844	1	1204	-3.26859	0	1	0	2983	-0.614799	0	6677	-0.797226	0	0	0	208	0	0	14740	0.345239	0	0	0	0	0	0	13374	0.204933	0	0	0
9938	BC039591	ARHGAP25	ARHGAP25	1377	0	0	*	1325	50	0	0	0	0	0	0	0	0	0	0	0	0	0	0	0	0	0	0	0	3117	5.96209	1	1	0	0	0	0	0	0	0	0	0	0	0	0	0	0	0	0	0
90806	BC047469	ANGEL2	ANGEL2	861	0	0	*	61	169	0	0	0	0	0	0	0	0	0	0	0	0	0	0	0	0	0	0	0	0	0	0	0	0	158	0	0	0	0	0	0	0	0	0	0	0	0	0	0	0
10218	BC001881	ANGPTL7	ANGPTL7	1041	0	0	*	2713	696	165	0	0	2249	1.69212	1	1	0	0	0	0	2840	2.02873	1	1	0	4531	0.73994	0	0	0	0	0	0	0	0	0	1875	1.42973	0	0	0	0	0	0	0	0	0	0	0
379	BC000043	ARF4L	ARL4D	606	0	0	*	812	574	0	0	0	0	0	0	0	0	0	0	0	15	0	0	0	0	0	0	0	7671	3.74029	1	1	0	0	0	0	0	0	0	0	0	0	0	0	3877	2.75582	1	1	0
54470	BC007677	ARMCX6	ARMCX6	903	0	0	*	50	390	0	0	0	0	0	0	0	0	0	0	0	0	0	0	0	0	0	0	0	5635	3.85287	1	1	0	0	0	0	4208	3.43159	1	1	0	0	0	0	0	0	0	0	0
54882	BC009420	ANKHD1	ANKHD1	1851	0	0	*	1261	200	0	0	0	0	0	0	0	0	1205	-0.0655351	0	0	0	0	0	0	1172	-0.105596	0	0	0	0	0	0	179	0	0	0	0	0	0	0	0	0	0	1661	3.05398	1	1	0
51281	BC033495	ANKMY1	ANKMY1	1320	0	0	*	231	484	326	0	0	0	0	0	0	0	0	0	0	0	0	0	0	0	170	0	0	0	0	0	0	0	50	0	0	279	0	0	0	0	0	0	0	0	0	0	0	0
57037	BC035353	ANKMY2	ANKMY2	1326	0	0	*	2038	3589	3179	0.641419	0	32089	3.16043	1	1	0	0	0	0	8119	1.17772	0	0	0	1887	-0.11106	0	6800	0.921953	0	0	0	1625	-0.326714	0	6002	0.741861	0	0	0	0	0	0	10855	1.59671	1	1	0
55723	BC036521	ASF1B	ASF1B	609	0	0	*	3559	1589	2189	-0.7012	0	8459	2.41237	1	1	0	0	0	0	0	0	0	0	0	0	0	0	6228	1.97065	1	1	0	0	0	0	0	0	0	0	0	0	0	0	0	0	0	0	0
91419	BC012776	KUB3	ATP23	741	0	0	*	215	50	0	0	0	0	0	0	0	0	0	0	0	0	0	0	0	0	49	0	0	1216	4.60407	1	1	0	0	0	0	14	0	0	0	0	0	0	0	0	0	0	0	0
78995	BC000121	MGC3130	C17orf53	1566	0	0	*	50	50	0	0	0	2923	5.86938	1	1	0	0	0	0	0	0	0	0	0	0	0	0	0	0	0	0	0	3878	6.27724	1	0	0	0	1	6.27724	0	0	0	1385	4.79181	1	1	0
338692	BC044239	ANKRD13D	ANKRD13D	768	0	0	*	2292	4266	6291	1.45668	0	22335	2.38835	1	1	0	0	0	0	13028	1.61066	1	1	0	4271	0.897967	0	0	0	0	0	0	1423	-0.687671	0	0	0	0	0	0	0	0	0	0	0	0	0	0
54522	BC062346	ANKRD16	ANKRD16	1086	0	0	*	50	50	932	4.22033	1	0	0	0	1	0	0	0	0	0	0	0	0	0	0	0	0	0	0	0	0	0	0	0	0	0	0	0	0	0	0	0	0	0	0	0	0	0
155066	BC015899	ATP6V0E2L	ATP6V0E2	279	0	0	*	4925	2150	3916	-0.330743	0	8222	1.93515	1	1	0	0	0	0	154	0	0	0	0	4606	-0.0966093	0	6843	1.67029	1	1	0	0	0	0	4513	1.06975	0	0	0	0	0	0	19245	3.16208	1	1	0
375248	BC046186	ANKRD36	ANKRD36	492	0	0	*	3146	3140	69	0	0	3114	-0.0119956	0	0	0	0	0	0	0	0	0	0	0	5950	0.919371	0	3068	-0.0334661	0	0	0	7961	1.33943	0	5633	0.843139	0	0	0	0	0	0	0	0	0	0	0
51239	BC031303	ANKRD39	ANKRD39	552	0	0	*	50	365	846	4.08066	1	0	0	0	1	0	0	0	0	0	0	0	0	0	0	0	0	0	0	0	0	0	0	0	0	0	0	0	0	0	0	0	0	0	0	0	0	0
129138	BC014641	LOC129138	ANKRD54	903	1	0	NA	996	1095	0	0	0	5441	2.31294	1	1	0	0	0	0	2933	1.42145	0	0	0	0	0	0	1993	0.864011	0	0	0	4435	2.15472	1	2054	0.907505	0	1	0	0	0	0	2298	1.06945	0	0	0
22881	BC042173	ANKRD6	ANKRD6	2169	1	0	NA	349	231	0	0	0	0	0	0	0	0	0	0	0	0	0	0	0	0	0	0	0	0	0	0	0	0	0	0	0	0	0	0	0	0	0	0	0	0	0	0	0	0
526	BC003100	ATP6V1B2	ATP6V1B2	1536	0	0	*	50	53	2384	5.57531	1	0	0	0	1	0	0	0	0	0	0	0	0	0	0	0	0	1415	4.73867	1	1	0	0	0	0	3	0	0	0	0	0	0	0	0	0	0	0	0
550	BC033646	AUP1	AUP1	1233	0	0	*	6284	1074	1959	-1.68157	0	0	0	0	0	0	0	0	0	11530	3.42433	1	1	0	225	0	0	5015	2.22326	1	1	0	8005	0.349218	0	3	0	0	0	0	0	0	0	0	0	0	0	0
84168	BC012074	ANTXR1	ANTXR1	1002	0	0	*	710	1585	0	0	0	0	0	0	0	0	1644	1.21132	0	0	0	0	0	0	36	0	0	0	0	0	0	0	0	0	0	5564	1.81164	1	1	0	3	0	0	1080	-0.553452	0	0	0
118429	BC034001	ANTXR2	ANTXR2	459	0	0	*	1656	1127	0	0	0	6618	2.55391	1	1	0	0	0	0	5495	2.28563	1	1	0	2161	0.383996	0	0	0	0	0	0	6192	1.9027	1	3163	1.48881	0	1	0	0	0	0	7864	2.80278	1	1	0
301	BC035993	ANXA1	ANXA1	1041	0	0	*	3149	655	0	0	0	0	0	0	0	0	0	0	0	0	0	0	0	0	0	0	0	0	0	0	0	0	0	0	0	0	0	0	0	0	0	0	0	0	0	0	0	0
3576	BC013615	IL8	CXCL8	300	0	0	*	68	980	2023	4.89482	1	0	0	0	1	0	0	0	0	0	0	0	0	0	0	0	0	14128	3.84963	1	1	0	7858	6.85248	1	0	0	0	1	6.85248	0	0	0	0	0	0	0	0
308	BC018671	ANXA5	ANXA5	963	0	0	*	1391	683	29	0	0	0	0	0	0	0	3178	1.192	0	0	0	0	0	0	0	0	0	0	0	0	0	0	0	0	0	316	0	0	0	0	0	0	0	0	0	0	0	0
310	BC002632	ANXA7	ANXA7	1401	0	0	*	409	200	0	0	0	0	0	0	0	0	0	0	0	0	0	0	0	0	158	0	0	0	0	0	0	0	0	0	0	0	0	0	0	0	0	0	0	0	0	0	0	0
10053	BC005021	AP1M2	AP1M2	1278	0	0	*	5187	6775	0	0	0	20168	1.57378	1	1	0	384	0	0	0	0	0	0	0	0	0	0	0	0	0	0	0	1311	-1.98423	0	13773	1.02355	0	0	0	0	0	0	0	0	0	0	0
8905	BC001117	AP1S2	AP1S2	474	0	0	*	2627	2540	0	0	0	0	0	0	0	0	0	0	0	0	0	0	0	0	0	0	0	516	-2.29939	0	0	0	1012	-1.37621	0	11	0	0	0	0	0	0	0	581	-2.12822	0	0	0
130340	BC009606	AP1S3	AP1S3	495	0	0	*	1808	2519	208	0	0	0	0	0	0	0	0	0	0	46	0	0	0	0	0	0	0	156	0	0	0	0	2288	0.339692	0	411	0	0	0	0	8	0	0	0	0	0	0	0
1173	BC013796	AP2M1	AP2M1	1302	0	0	*	4011	2902	0	0	0	0	0	0	0	0	0	0	0	0	0	0	0	0	0	0	0	0	0	0	0	0	0	0	0	0	0	0	0	0	0	0	0	0	0	0	0	0
1175	BC006337	AP2S1	AP2S1	429	0	0	*	6957	7028	1089	-2.67546	0	23743	1.75632	1	1	0	712	-3.28852	0	31	0	0	0	0	2180	-1.67414	0	101	0	0	0	0	0	0	0	1822	-1.94759	0	0	0	0	0	0	1205	-2.54408	0	0	0
10947	BC056257	AP3M2	AP3M2	822	0	0	*	108	1301	0	0	0	0	0	0	0	0	0	0	0	0	0	0	0	0	0	0	0	0	0	0	0	0	0	0	0	3898	1.58311	1	1	0	0	0	0	0	0	0	0	0
1176	BC000804	AP3S1	AP3S1	582	0	0	*	82	699	0	0	0	0	0	0	0	0	0	0	0	0	0	0	0	0	0	0	0	0	0	0	0	0	0	0	0	0	0	0	0	0	0	0	0	0	0	0	0	0
10239	BC010020	AP3S2	AP3S2	582	0	0	*	3918	3742	0	0	0	7849	1.0687	0	0	0	0	0	0	0	0	0	0	0	0	0	0	0	0	0	0	0	0	0	0	0	0	0	0	0	2426	-0.691538	0	0	0	0	0	0
53335	BC021098	BCL11A	BCL11A	2322	1	1	C2H2 ZF	708	534	0	0	0	3735	2.8062	1	1	0	0	0	0	0	0	0	0	0	957	0.43477	0	4673	3.12944	1	1	0	0	0	0	7151	3.74323	1	1	0	0	0	0	0	0	0	0	0
9546	BC008338	APBA3	APBA3	1002	0	0	*	681	434	0	0	0	4412	3.34567	1	1	0	603	-0.175497	0	525	0.274622	0	0	0	12	0	0	18	0	0	0	0	6224	3.19212	1	190	0	0	1	0	0	0	0	28	0	0	0	0
11224	BC000348	RPL35	RPL35	372	0	0	*	50	690	3785	6.24222	1	0	0	0	1	6.24222	0	0	0	0	0	0	0	0	0	0	0	0	0	0	0	0	5289	6.72492	1	0	0	0	1	6.72492	0	0	0	1786	1.37206	0	0	0
10574	BC019296	CCT7	CCT7	1632	0	0	*	50	1164	0	0	0	0	0	0	0	0	0	0	0	0	0	0	0	0	0	0	0	1611	0.468865	0	0	0	4875	6.60733	1	0	0	0	1	6.60733	0	0	0	0	0	0	0	0
51107	BC020590	APH1A	APH1A	798	0	0	*	5196	2700	0	0	0	0	0	0	0	0	0	0	0	0	0	0	0	0	136	0	0	403	0	0	0	0	0	0	0	4116	0.608284	0	0	0	0	0	0	3489	0.369854	0	0	0
83464	BC020905	APH1B	APH1B	774	0	0	*	72	1379	0	0	0	1234	-0.16028	0	0	0	0	0	0	0	0	0	0	0	11	0	0	1592	0.207218	0	0	0	0	0	0	1299	-0.086221	0	0	0	3	0	0	0	0	0	0	0
51074	BC008440	MMRP19	APIP	729	0	0	*	50	1367	0	0	0	0	0	0	0	0	0	0	0	0	0	0	0	0	0	0	0	0	0	0	0	0	0	0	0	0	0	0	0	0	0	0	0	9401	2.7818	1	1	0
653	BC027958	BMP5	BMP5	1365	1	1	NA	50	237	0	0	0	3011	3.66728	1	1	0	0	0	0	0	0	0	0	0	0	0	0	0	0	0	0	0	0	0	0	0	0	0	0	0	0	0	0	0	0	0	0	0
623	BC034705	BDKRB1	BDKRB1	1062	0	0	*	2031	1021	1575	-0.366838	0	0	0	0	0	0	0	0	0	0	0	0	0	0	0	0	0	11751	3.52473	1	1	0	0	0	0	0	0	0	0	0	0	0	0	0	0	0	0	0
27350	BC011739	APOBEC3C	APOBEC3C	573	0	0	*	2084	1738	5	0	0	0	0	0	0	0	0	0	0	62	0	0	0	0	0	0	0	0	0	0	0	0	0	0	0	0	0	0	0	0	0	0	0	2686	0.628031	0	0	0
200316	BC017022	APOBEC3F	APOBEC3F	1161	0	0	*	5158	2906	0	0	0	0	0	0	0	0	0	0	0	0	0	0	0	0	0	0	0	0	0	0	0	0	0	0	0	0	0	0	0	0	0	0	0	0	0	0	0	0
57596	BC002607	KIAA1446	BEGAIN	1782	0	0	*	2570	918	328	0	0	10084	3.45743	1	1	0	0	0	0	0	0	0	0	0	0	0	0	2900	1.65949	1	1	0	0	0	0	0	0	0	0	0	0	0	0	11076	3.5928	1	1	0
341	BC009698	APOC1	APOC1	252	0	0	*	8936	8607	3494	-1.35475	0	0	0	0	0	0	0	0	0	0	0	0	0	0	0	0	0	3600	-1.25751	0	0	0	0	0	0	7637	-0.172504	0	0	0	0	0	0	0	0	0	0	0
344	BC065270	APOC2	APOC2	219	0	0	*	2793	4950	4540	0.700877	0	0	0	0	0	0	1534	-0.864517	0	988	-2.32485	0	0	0	1304	-1.09887	0	2087	-1.246	0	0	0	3705	0.407658	0	0	0	0	0	0	0	0	0	0	0	0	0	0
345	BC027977	APOC3	APOC3	300	0	0	*	4302	2778	0	0	0	4650	0.743184	0	0	0	0	0	0	0	0	0	0	0	0	0	0	0	0	0	0	0	4529	0.074185	0	0	0	0	0	0	3078	-0.483014	0	2243	-0.308617	0	0	0
348	BC003557	APOE	APOE	954	0	0	*	1923	1011	0	0	0	0	0	0	0	0	0	0	0	0	0	0	0	0	0	0	0	0	0	0	0	0	0	0	0	5801	2.52052	1	1	0	0	0	0	0	0	0	0	0
319	BC026257	APOF	APOF	981	0	0	*	161	50	0	0	0	741	3.88947	1	1	0	0	0	0	0	0	0	0	0	0	0	0	461	0	0	0	0	0	0	0	0	0	0	0	0	0	0	0	0	0	0	0	0
350	BC026283	APOH	APOH	1038	0	0	*	3464	1735	0	0	0	0	0	0	0	0	0	0	0	0	0	0	0	0	868	-1.99667	0	0	0	0	0	0	0	0	0	0	0	0	0	0	0	0	0	12114	2.80367	1	1	0
8542	BC017331	APOL1	APOL1	717	0	0	*	4266	4900	0	0	0	0	0	0	0	0	0	0	0	0	0	0	0	0	0	0	0	0	0	0	0	0	0	0	0	0	0	0	0	0	0	0	0	0	0	0	0	0
55937	BC020683	APOM	APOM	567	0	0	*	3232	2157	16	0	0	9495	2.13814	1	1	0	0	0	0	10913	2.33895	1	1	0	0	0	0	0	0	0	0	0	0	0	0	6150	1.51156	1	1	0	0	0	0	0	0	0	0	0
351	BC004369	APP	APP	918	1	1	NA	194	368	0	0	0	0	0	0	0	0	0	0	0	0	0	0	0	0	0	0	0	0	0	0	0	0	0	0	0	0	0	0	0	0	0	0	0	3627	3.301	1	1	0
29952	BC011907	DPP7	DPP7	1479	0	0	*	53	2163	1770	5.06161	1	2004	-0.110151	0	1	0	0	0	0	4800	1.15	0	0	0	0	0	0	0	0	0	0	0	5426	6.67775	1	0	0	0	1	6.67775	0	0	0	2243	0.052396	0	0	0
89872	BC069607	AQP10	AQP10	906	0	0	*	1395	690	2912	1.06175	0	7072	3.35745	1	1	0	0	0	0	942	0.449131	0	0	0	0	0	0	0	0	0	0	0	0	0	0	0	0	0	0	0	0	0	0	0	0	0	0	0
242	BC041058	ALOX12B	ALOX12B	2106	0	0	*	50	181	0	0	0	0	0	0	0	0	5151	6.68678	1	324	0	0	1	6.68678	0	0	0	889	2.29619	1	1	0	0	0	0	0	0	0	0	0	0	0	0	0	0	0	0	0
362	BC032946	AQP5	AQP5	798	0	0	*	5569	3998	5608	0.0100681	0	4246	0.0868259	0	0	0	13151	1.23968	0	3334	-0.262024	0	0	0	5283	-0.0760609	0	0	0	0	0	0	1376	-2.01694	0	788	-2.34301	0	0	0	6	0	0	9747	1.28568	0	0	0
51283	BC003054	BFAR	BFAR	1353	0	0	*	50	378	0	0	0	0	0	0	0	0	0	0	0	13089	5.11382	1	1	0	0	0	0	8795	4.54023	1	1	0	109	0	0	0	0	0	0	0	0	0	0	1606	2.08701	1	1	0
343	BC040630	AQP8	AQP8	768	0	0	*	3517	584	0	0	0	0	0	0	0	0	0	0	0	0	0	0	0	0	0	0	0	0	0	0	0	0	0	0	0	0	0	0	0	0	0	0	0	928	0.668156	0	0	0
366	BC026258	AQP9	AQP9	888	0	0	*	1610	1741	0	0	0	9353	2.42551	1	1	0	0	0	0	0	0	0	0	0	0	0	0	0	0	0	0	0	933	-0.787112	0	0	0	0	0	0	0	0	0	0	0	0	0	0
11118	BC002832	BTN3A2	BTN3A2	999	0	0	*	50	574	0	0	0	0	0	0	0	0	0	0	0	0	0	0	0	0	0	0	0	0	0	0	0	0	0	0	0	0	0	0	0	0	0	0	0	0	0	0	0	0
378	BC003364	ARF4	ARF4	543	0	0	*	900	652	0	0	0	0	0	0	0	0	0	0	0	0	0	0	0	0	0	0	0	15	0	0	0	0	0	0	0	0	0	0	0	0	0	0	0	0	0	0	0	0
382	BC008918	ARF6	ARF6	528	0	0	*	644	2247	0	0	0	0	0	0	0	0	9918	3.94492	1	0	0	0	1	0	0	0	0	0	0	0	0	0	0	0	0	0	0	0	0	0	0	0	0	0	0	0	0	0
55738	BC000786	ARFGAP1	ARFGAP1	1212	0	0	*	116	1395	13	0	0	0	0	0	0	0	0	0	0	0	0	0	0	0	0	0	0	0	0	0	0	0	0	0	0	0	0	0	0	0	0	0	0	0	0	0	0	0
383	BC020653	ARG1	ARG1	969	0	0	*	727	693	0	0	0	4	0	0	0	0	0	0	0	0	0	0	0	0	0	0	0	0	0	0	0	0	0	0	0	22	0	0	0	0	0	0	0	0	0	0	0	0
26258	BC004819	PLDN	BLOC1S6	519	0	0	*	788	911	0	0	0	0	0	0	0	0	0	0	0	0	0	0	0	0	689	-0.193692	0	3973	2.12471	1	1	0	0	0	0	4697	2.36622	1	1	0	0	0	0	0	0	0	0	0
2537	BC024289	IFI6	IFI6	1416	0	0	*	50	1944	3705	6.2114	1	0	0	0	1	6.2114	0	0	0	5665	1.54305	1	1	0	0	0	0	0	0	0	0	0	0	0	0	0	0	0	0	0	0	0	0	0	0	0	0	0
55843	BC016701	ARHGAP15	ARHGAP15	1428	0	0	*	3947	2628	2194	-0.847193	0	0	0	0	0	0	110	0	0	2778	0.0800813	0	0	0	1177	-1.74564	0	0	0	0	0	0	70	0	0	8903	1.76033	1	1	0	0	0	0	138	0	0	0	0
652	BC020546	BMP4	BMP4	1227	1	1	Unknown	2669	2110	6986	1.38817	0	1671	-0.336531	0	0	0	0	0	0	0	0	0	0	0	914	-1.54603	0	10412	2.30293	1	1	0	4101	0.619676	0	0	0	0	0	0	0	0	0	0	0	0	0	0
665	BC001559	BNIP3L	BNIP3L	660	0	0	*	742	3002	0	0	0	14	0	0	0	0	0	0	0	0	0	0	0	0	0	0	0	10537	1.81147	1	1	0	1880	1.34124	0	0	0	0	0	0	3	0	0	0	0	0	0	0
1880	BC020752	EBI2	GPR183	1086	0	0	*	50	1120	3489	6.12474	1	0	0	0	1	6.12474	0	0	0	0	0	0	0	0	0	0	0	37	0	0	0	0	0	0	0	7785	2.7972	1	1	0	0	0	0	0	0	0	0	0
9411	BC022483	ARHGAP29	ARHGAP29	1182	0	0	*	255	384	0	0	0	0	0	0	0	0	384	0	0	0	0	0	0	0	0	0	0	0	0	0	0	0	9	0	0	0	0	0	0	0	0	0	0	0	0	0	0	0
394	BC075799	ARHGAP5	ARHGAP5	714	0	0	*	1275	1067	0	0	0	0	0	0	0	0	0	0	0	0	0	0	0	0	0	0	0	0	0	0	0	0	0	0	0	0	0	0	0	0	0	0	0	0	0	0	0	0
398	BC047699	ARHGDIG	ARHGDIG	678	0	0	*	130	2338	0	0	0	0	0	0	0	0	0	0	0	0	0	0	0	0	0	0	0	0	0	0	0	0	0	0	0	0	0	0	0	0	8	0	0	0	0	0	0	0
283	BC062698	ANG	ANG	444	0	0	*	50	1158	0	0	0	1160	0.00248955	0	0	0	15288	8.25626	1	0	0	0	1	8.25626	0	0	0	5663	2.28993	1	1	0	0	0	0	721	-0.683564	0	0	0	0	0	0	0	0	0	0	0
27237	BC051838	ARHGEF16	ARHGEF16	1266	0	0	*	65	6245	0	0	0	0	0	0	0	0	0	0	0	0	0	0	0	0	22	0	0	0	0	0	0	0	0	0	0	0	0	0	0	0	0	0	0	5400	-0.209742	0	0	0
10965	BC004436	ACOT2	ACOT2	1266	0	0	*	50	783	0	0	0	0	0	0	0	0	3890	6.2817	1	0	0	0	1	6.2817	268	0	0	813	0.054243	0	0	0	0	0	0	0	0	0	0	0	0	0	0	0	0	0	0	0
84904	BC033666	C9orf100	ARHGEF39	1008	0	0	*	4112	7122	16	0	0	1734	-2.03818	0	0	0	11836	1.52527	1	5094	-0.483483	0	1	0	0	0	0	0	0	0	0	0	642	-2.6792	0	0	0	0	0	0	0	0	0	2700	-1.39932	0	0	0
8452	BC039598	CUL3	CUL3	2307	1	0	Unknown	50	306	7410	7.2114	1	0	0	0	1	7.2114	0	0	0	0	0	0	0	0	0	0	0	0	0	0	0	0	0	0	0	0	0	0	0	0	0	0	0	0	0	0	0	0
56683	BC000709	C21orf59	CFAP298	873	0	0	*	50	359	0	0	0	21	0	0	0	0	0	0	0	0	0	0	0	0	0	0	0	0	0	0	0	0	4004	6.32337	1	0	0	0	1	6.32337	0	0	0	0	0	0	0	0
115761	BC013150	ARL11	ARL11	591	0	0	*	50	272	0	0	0	0	0	0	0	0	0	0	0	0	0	0	0	0	0	0	0	0	0	0	0	0	0	0	0	0	0	0	0	0	0	0	0	0	0	0	0	0
80117	BC034354	ARF7	ARL14	579	0	0	*	1445	1832	0	0	0	7743	2.07947	1	1	0	0	0	0	0	0	0	0	0	0	0	0	58	0	0	0	0	0	0	0	95	0	0	0	0	0	0	0	0	0	0	0	0
120534	BC047775	FLJ38968	ARL14EP	783	0	0	*	836	836	0	0	0	0	0	0	0	0	0	0	0	0	0	0	0	0	0	0	0	0	0	0	0	0	0	0	0	7760	3.21448	1	1	0	0	0	0	0	0	0	0	0
54622	BC026093	ARFRP2	ARL15	615	0	0	*	1348	4875	0	0	0	316	-3.94741	0	0	0	0	0	0	0	0	0	0	0	0	0	0	0	0	0	0	0	0	0	0	9353	0.940027	0	0	0	0	0	0	0	0	0	0	0
51326	BC030570	LOC51326	ARL17A	483	0	0	*	2160	1358	0	0	0	0	0	0	0	0	0	0	0	0	0	0	0	0	0	0	0	339	0	0	0	0	0	0	0	0	0	0	0	0	0	0	0	0	0	0	0	0
402	BC002530	ARL2	ARL2	555	0	0	*	2441	527	0	0	0	27456	5.70317	1	1	0	0	0	0	0	0	0	0	0	0	0	0	0	0	0	0	0	0	0	0	12407	4.55721	1	1	0	0	0	0	0	0	0	0	0
10124	BC001111	ARL4	ARL4A	603	0	0	*	50	1670	0	0	0	181	-3.20579	0	0	0	712	3.83188	1	0	0	0	1	0	0	0	0	0	0	0	0	0	0	0	0	3149	0.915046	0	0	0	0	0	0	0	0	0	0	0
283870	BC039154	MGC21830	BRICD5	687	0	0	*	4165	2609	8	0	0	0	0	0	0	0	0	0	0	0	0	0	0	0	1	0	0	7729	1.56678	1	1	0	0	0	0	0	0	0	0	0	0	0	0	4181	0.680351	0	0	0
51329	BC001958	ARL6IP4	ARL6IP4	657	0	0	*	2666	2647	3473	0.381506	0	0	0	0	0	0	0	0	0	1652	-0.680145	0	0	0	0	0	0	1042	-1.345	0	0	0	1299	-1.03728	0	2057	-0.363816	0	0	0	0	0	0	0	0	0	0	0
10550	BC005143	ARL6IP5	ARL6IP5	567	0	0	*	3725	3424	355	0	0	2263	-0.597446	0	0	0	0	0	0	46	0	0	0	0	8238	1.14505	0	3628	0.0834918	0	0	0	0	0	0	4748	0.471637	0	0	0	0	0	0	3614	0.0779138	0	0	0
1675	BC057807	DF	CFD	762	0	0	*	50	453	0	0	0	0	0	0	0	0	0	0	0	3164	2.80417	1	1	0	0	0	0	0	0	0	0	0	3403	6.08874	1	0	0	0	1	6.08874	0	0	0	0	0	0	0	0
9802	BC002334	DAZAP2	DAZAP2	507	1	0	NA	50	596	6841	7.09614	1	0	0	0	1	7.09614	0	0	0	0	0	0	0	0	5	0	0	0	0	0	0	0	0	0	0	0	0	0	0	0	0	0	0	0	0	0	0	0
55207	BC013131	ARL10C	ARL8B	561	0	0	*	509	696	0	0	0	0	0	0	0	0	0	0	0	0	0	0	0	0	0	0	0	95	0	0	0	0	97	0	0	0	0	0	0	0	0	0	0	6992	3.32855	1	1	0
55156	BC011607	ARMC1	ARMC1	849	0	0	*	1073	3698	0	0	0	0	0	0	0	0	0	0	0	0	0	0	0	0	0	0	0	0	0	0	0	0	0	0	0	0	0	0	0	0	0	0	0	0	0	0	0	0
79637	BC011728	ARMC7	ARMC7	597	0	0	*	8990	5939	12644	0.49206	0	724	-3.03616	0	0	0	10466	0.219317	0	0	0	0	0	0	853	-3.3977	0	14856	1.32275	0	0	0	766	-3.5529	0	3703	-0.681525	0	0	0	0	0	0	10038	0.75718	0	0	0
25852	BC013424	ARMC8	ARMC8	1158	0	0	*	3414	1757	10157	1.57294	1	0	0	0	1	0	0	0	0	0	0	0	0	0	3624	0.0861199	0	0	0	0	0	0	2423	-0.494669	0	0	0	0	0	0	990	-1.78596	0	0	0	0	0	0
414157	BC037252	C10orf62	C10orf62	672	0	0	*	7566	2796	924	-3.03357	0	8651	1.6295	1	1	0	0	0	0	0	0	0	0	0	0	0	0	11686	2.06334	1	1	0	0	0	0	0	0	0	0	0	0	0	0	0	0	0	0	0
339541	BC026115	MGC33556	ARMH1	924	0	0	*	1659	705	3	0	0	0	0	0	0	0	0	0	0	0	0	0	0	0	0	0	0	86	0	0	0	0	0	0	0	0	0	0	0	0	0	0	0	512	-0.461479	0	0	0
79624	BC011348	C6orf211	ARMT1	1326	0	0	*	50	1261	0	0	0	0	0	0	0	0	0	0	0	0	0	0	0	0	0	0	0	0	0	0	0	0	0	0	0	0	0	0	0	0	0	0	0	0	0	0	0	0
56673	BC027865	C11orf16	C11orf16	1215	0	0	*	1076	56	0	0	0	0	0	0	0	0	0	0	0	0	0	0	0	0	0	0	0	1323	4.56224	1	1	0	0	0	0	0	0	0	0	0	0	0	0	0	0	0	0	0
100	BC007678	ADA	ADA	1092	0	0	*	50	300	0	0	0	0	0	0	0	0	5425	6.76155	1	0	0	0	1	6.76155	0	0	0	0	0	0	0	0	0	0	0	0	0	0	0	0	0	0	0	0	0	0	0	0
10552	BC039594	ARPC1A	ARPC1A	1113	0	0	*	1672	605	0	0	0	0	0	0	0	0	55	0	0	0	0	0	0	0	0	0	0	0	0	0	0	0	0	0	0	11	0	0	0	0	0	0	0	0	0	0	0	0
10094	BC067747	ARPC3	ARPC3	537	0	0	*	3784	4029	0	0	0	0	0	0	0	0	0	0	0	0	0	0	0	0	3856	0.027193	0	0	0	0	0	0	0	0	0	3540	-0.186672	0	0	0	699	-2.43655	0	443	0	0	0	0
341032	BC039669	MGC50104	C11orf53	711	0	0	*	793	337	0	0	0	0	0	0	0	0	0	0	0	0	0	0	0	0	0	0	0	2173	2.68887	1	1	0	0	0	0	0	0	0	0	0	0	0	0	0	0	0	0	0
410	BC014210	ARSA	ARSA	1524	0	0	*	50	50	0	0	0	1816	5.18269	1	1	0	0	0	0	0	0	0	0	0	0	0	0	0	0	0	0	0	0	0	0	0	0	0	0	0	0	0	0	0	0	0	0	0
416	BC022389	ARSF	ARSF	1773	0	0	*	1375	1554	0	0	0	3682	1.2445	0	0	0	0	0	0	0	0	0	0	0	404	0	0	0	0	0	0	0	0	0	0	0	0	0	0	0	6	0	0	42	0	0	0	0
116969	BC014577	ART5	ART5	879	0	0	*	121	630	0	0	0	2933	2.21895	1	1	0	0	0	0	262	0	0	0	0	0	0	0	0	0	0	0	0	0	0	0	0	0	0	0	0	0	0	0	0	0	0	0	0
54851	BC017798	ANKRD49	ANKRD49	720	1	0	NA	50	169	6316	6.98094	1	0	0	0	1	6.98094	5315	6.732	1	0	0	0	1	6.732	8045	7.33002	1	0	0	0	1	7.33002	11630	7.86171	1	0	0	0	1	7.86171	9524	7.5735	1	0	0	0	1	7.5735
51665	BC014528	ASB1	ASB1	1008	1	0	NA	50	1074	0	0	0	14014	3.7058	1	1	0	0	0	0	5125	2.25456	1	1	0	0	0	0	0	0	0	0	0	0	0	0	0	0	0	0	0	61	0	0	10813	3.3317	1	1	0
79754	BC012056	ASB13	ASB13	522	0	0	*	1587	3049	0	0	0	5622	0.882747	0	0	0	0	0	0	5788	0.924729	0	0	0	433	0	0	682	-2.16049	0	0	0	0	0	0	17	0	0	0	0	0	0	0	540	-2.4973	0	0	0
54955	BC063843	C1orf109	C1orf109	612	0	0	*	5117	821	0	0	0	0	0	0	0	0	0	0	0	0	0	0	0	0	2206	-1.21387	0	5638	2.77973	1	1	0	0	0	0	2425	1.56253	1	1	0	8894	0.797534	0	0	0	0	0	0
140459	BC065913	ASB6	ASB6	1266	1	0	NA	7613	12268	8865	0.219656	0	18018	0.554539	0	0	0	16712	1.13435	0	7085	-0.79206	0	0	0	15867	1.05949	0	7283	-0.752295	0	0	0	15801	1.05348	0	5231	-1.22974	0	0	0	19965	1.39094	0	4693	-1.38632	0	0	0
140461	BC001321	ASB8	ASB8	867	1	0	NA	50	443	0	0	0	0	0	0	0	0	0	0	0	0	0	0	0	0	0	0	0	0	0	0	0	0	0	0	0	0	0	0	0	0	53	0	0	0	0	0	0	0
140462	BC013172	ASB9	ASB9	885	1	0	NA	3909	3152	6908	0.821468	0	0	0	0	0	0	14740	1.91487	1	8057	1.35398	0	1	0	10159	1.37789	0	0	0	0	0	0	3740	-0.0637613	0	0	0	0	0	0	16078	2.04022	1	0	0	0	1	0
1649	BC003637	DDIT3	DDIT3	510	1	1	bZIP	50	50	8611	7.42811	1	0	0	0	1	7.42811	6575	7.03892	1	0	0	0	1	7.03892	8414	7.39472	1	0	0	0	1	7.39472	4165	6.38024	1	0	0	0	1	6.38024	3291	6.04045	1	0	0	0	1	6.04045
10973	BC050681	ASCC3	ASCC3	336	1	0	NA	2095	2693	1578	-0.408853	0	646	-2.05961	0	0	0	0	0	0	5866	1.12316	0	0	0	0	0	0	0	0	0	0	0	0	0	0	377	0	0	0	0	0	0	0	0	0	0	0	0
25842	BC010878	ASF1A	ASF1A	615	1	0	NA	777	3832	0	0	0	0	0	0	0	0	0	0	0	0	0	0	0	0	0	0	0	0	0	0	0	0	0	0	0	0	0	0	0	0	0	0	0	0	0	0	0	0
132200	BC015210	MGC17310	C3orf49	879	0	0	*	1068	181	0	0	0	0	0	0	0	0	0	0	0	0	0	0	0	0	0	0	0	8129	5.48902	1	1	0	0	0	0	0	0	0	0	0	0	0	0	0	0	0	0	0
433	BC017251	ASGR2	ASGR2	864	0	0	*	4812	1901	8293	0.785257	0	19501	3.35872	1	1	0	0	0	0	602	-1.65892	0	0	0	0	0	0	1161	-0.711391	0	0	0	1223	-1.97621	0	22	0	0	0	0	0	0	0	1038	-0.872952	0	0	0
9070	BC015936	ASH2L	ASH2L	1605	1	0	NA	2773	2718	798	-1.79699	0	0	0	0	0	0	1041	-1.41348	0	0	0	0	0	0	1875	-0.564557	0	0	0	0	0	0	1367	-1.02043	0	0	0	0	0	0	1234	-1.16811	0	0	0	0	0	0
55515	BC073912	ACCN4	ASIC4	891	0	0	*	3974	1956	48	0	0	0	0	0	0	0	0	0	0	0	0	0	0	0	44	0	0	2970	0.602557	0	0	0	0	0	0	5837	1.57732	1	1	0	0	0	0	0	0	0	0	0
762	BC057792	CA4	CA4	939	0	0	*	416	428	0	0	0	0	0	0	0	0	0	0	0	0	0	0	0	0	0	0	0	5330	3.63845	1	1	0	0	0	0	0	0	0	0	0	0	0	0	0	0	0	0	0
443	BC029128	ASPA	ASPA	942	0	0	*	110	50	0	0	0	0	0	0	0	0	0	0	0	0	0	0	0	0	0	0	0	287	0	0	0	0	0	0	0	0	0	0	0	0	0	0	0	0	0	0	0	0
444	BC025236	ASPH	ASPH	813	0	0	*	5227	3293	448	0	0	0	0	0	0	0	6301	0.269598	0	0	0	0	0	0	23	0	0	3111	-0.0820241	0	0	0	0	0	0	615	-2.42074	0	0	0	0	0	0	0	0	0	0	0
151516	BC031997	FLJ25084	ASPRV1	459	0	0	*	991	1227	2034	1.03736	0	0	0	0	0	0	0	0	0	0	0	0	0	0	0	0	0	0	0	0	0	0	0	0	0	0	0	0	0	0	0	0	0	0	0	0	0	0
79058	BC018722	ASPSCR1	ASPSCR1	1662	0	0	*	1995	2269	9286	2.21867	1	0	0	0	1	0	6794	1.76787	1	0	0	0	1	0	4	0	0	0	0	0	0	0	0	0	0	5918	1.38305	0	0	0	0	0	0	3101	0.450677	0	0	0
445	BC009243	ASS	ASS1	1239	0	0	*	309	777	0	0	0	6434	3.04973	1	1	0	0	0	0	0	0	0	0	0	0	0	0	0	0	0	0	0	0	0	0	6497	3.06379	1	1	0	0	0	0	0	0	0	0	0
28990	BC030274	HT001	ASTE1	963	0	0	*	811	708	0	0	0	0	0	0	0	0	0	0	0	0	0	0	0	0	0	0	0	0	0	0	0	0	1830	1.17407	0	0	0	0	0	0	0	0	0	0	0	0	0	0
23245	BC029272	ASTN2	ASTN2	1323	0	0	*	220	696	0	0	0	0	0	0	0	0	0	0	0	525	-0.40677	0	0	0	0	0	0	0	0	0	0	0	0	0	0	0	0	0	0	0	0	0	0	0	0	0	0	0
374	BC009799	AREG	AREG	759	0	0	*	50	609	0	0	0	0	0	0	0	0	0	0	0	370	0	0	0	0	0	0	0	0	0	0	0	0	0	0	0	179	0	0	0	0	5612	6.81044	1	0	0	0	1	6.81044
83858	BC009938	ATAD3B	ATAD3B	1809	0	0	*	470	1835	198	0	0	0	0	0	0	0	0	0	0	0	0	0	0	0	0	0	0	12	0	0	0	0	1411	1.58599	1	0	0	0	1	0	0	0	0	0	0	0	0	0
1937	BC000384	EEF1G	EEF1G	1314	0	0	*	51	976	53	0	0	10141	3.37717	1	1	0	3068	5.91066	1	0	0	0	1	0	37	0	0	0	0	0	0	0	10372	7.66798	1	1509	0.62864	0	1	7.66798	438	0	0	0	0	0	0	0
3609	BC064836	ILF3	ILF3	2121	1	1	NA	50	662	11304	7.82069	1	0	0	0	1	7.82069	9534	7.57501	1	0	0	0	1	7.57501	12464	7.96162	1	0	0	0	1	7.96162	22005	8.78169	1	0	0	0	1	8.78169	11701	7.87049	1	0	0	0	1	7.87049
9776	BC006191	KIAA0652	ATG13	1218	0	0	*	1617	153	0	0	0	0	0	0	0	0	0	0	0	0	0	0	0	0	0	0	0	0	0	0	0	0	0	0	0	0	0	0	0	0	0	0	0	0	0	0	0	0
84971	BC068992	ATG4D	ATG4D	1425	0	0	*	1154	293	227	0	0	0	0	0	0	0	0	0	0	0	0	0	0	0	0	0	0	0	0	0	0	0	0	0	0	0	0	0	0	0	0	0	0	0	0	0	0	0
79065	BC065534	ATG9A	ATG9A	1587	0	0	*	761	1102	219	0	0	0	0	0	0	0	0	0	0	0	0	0	0	0	0	0	0	0	0	0	0	0	0	0	0	0	0	0	0	0	0	0	0	0	0	0	0	0
471	BC008879	ATIC	ATIC	1779	0	0	*	1087	612	0	0	0	0	0	0	0	0	0	0	0	0	0	0	0	0	1	0	0	0	0	0	0	0	2396	1.14028	0	0	0	0	0	0	0	0	0	0	0	0	0	0
64225	BC053508	ARL6IP2	ATL2	1239	0	0	*	811	209	0	0	0	0	0	0	0	0	0	0	0	0	0	0	0	0	0	0	0	0	0	0	0	0	0	0	0	0	0	0	0	0	0	0	0	0	0	0	0	0
170463	BC000274	SSBP4	SSBP4	1158	1	0	Unknown	50	193	5320	6.73335	1	0	0	0	1	6.73335	5753	6.84624	1	0	0	0	1	6.84624	22498	8.81365	1	0	0	0	1	8.81365	13164	8.04045	1	0	0	0	1	8.04045	10910	7.76951	1	0	0	0	1	7.76951
3080	BC022283	CFHL2	CFHR2	813	0	0	*	50	549	0	0	0	0	0	0	0	0	0	0	0	0	0	0	0	0	0	0	0	0	0	0	0	0	0	0	0	0	0	0	0	0	0	0	0	0	0	0	0	0
23200	BC042180	ATP11B	ATP11B	588	0	0	*	3904	4422	5074	0.37817	0	525	-3.07431	0	0	0	2192	-0.832705	0	417	0	0	0	0	451	0	0	413	0	0	0	0	308	0	0	0	0	0	0	0	0	0	0	2063	-1.09996	0	0	0
481	BC000006	ATP1B1	ATP1B1	912	0	0	*	509	2325	0	0	0	1766	-0.396745	0	0	0	0	0	0	0	0	0	0	0	3	0	0	0	0	0	0	0	1886	1.88959	1	1758	-0.403296	0	1	0	0	0	0	0	0	0	0	0
79012	BC000497	CAMKV	CAMKV	1506	0	0	*	2967	50	0	0	0	0	0	0	0	0	0	0	0	0	0	0	0	0	0	0	0	730	3.8679	1	1	0	396	0	0	0	0	0	0	0	0	0	0	97	0	0	0	0
825	BC003169	CAPN3	CAPN3	930	1	0	Unknown	1445	3873	0	0	0	0	0	0	0	0	0	0	0	31	0	0	0	0	3684	1.3502	0	25784	2.73495	1	1	0	7447	2.36559	1	0	0	0	1	0	2323	0.68492	0	3794	-0.0297318	0	0	0
496	BC029059	ATP4B	ATP4B	876	0	0	*	18141	12490	10501	-0.788727	0	0	0	0	0	0	12986	-0.482297	0	2547	-2.2939	0	0	0	1	0	0	4511	-1.46925	0	0	0	6694	-1.43831	0	59	0	0	0	0	0	0	0	2797	-2.15882	0	0	0
84290	BC005397	CAPNS2	CAPNS2	747	0	0	*	1404	353	11	0	0	0	0	0	0	0	0	0	0	0	0	0	0	0	0	0	0	2747	2.96012	1	1	0	1035	-0.439912	0	59	0	0	0	0	0	0	0	0	0	0	0	0
513	BC002389	ATP5D	ATP5F1D	507	0	0	*	282	128	0	0	0	0	0	0	0	0	0	0	0	0	0	0	0	0	0	0	0	0	0	0	0	0	0	0	0	50	0	0	0	0	0	0	0	3226	4.65553	1	1	0
10632	BC070165	ATP5L	ATP5MG	312	0	0	*	361	200	0	0	0	0	0	0	0	0	0	0	0	0	0	0	0	0	0	0	0	0	0	0	0	0	0	0	0	0	0	0	0	0	0	0	0	0	0	0	0	0
515	BC005960	ATP5F1	ATP5PB	771	0	0	*	3843	1008	3238	-0.24713	0	0	0	0	0	0	0	0	0	2670	1.40534	0	0	0	7	0	0	0	0	0	0	0	0	0	0	0	0	0	0	0	0	0	0	0	0	0	0	0
10476	BC038092	ATP5H	ATP5PD	486	0	0	*	7147	5153	1652	-2.11312	0	461	-3.48257	0	0	0	14246	0.995147	0	0	0	0	0	0	8731	0.288809	0	12343	1.26021	0	0	0	0	0	0	16258	1.65767	1	1	0	6837	-0.0639744	0	5261	0.0299245	0	0	0
177	BC020669	AGER	AGER	1215	1	0	Unknown	50	278	0	0	0	0	0	0	0	0	6082	6.92647	1	0	0	0	1	6.92647	0	0	0	0	0	0	0	0	0	0	0	0	0	0	0	0	0	0	0	3530	3.66651	1	1	0
539	BC021233	ATP5O	ATP5PO	642	0	0	*	220	50	0	0	0	53	0.0840643	0	0	0	0	0	0	0	0	0	0	0	0	0	0	0	0	0	0	0	0	0	0	3286	6.03826	1	1	0	0	0	0	0	0	0	0	0
537	BC000724	ATP6AP1	ATP6AP1	1413	0	0	*	415	512	0	0	0	0	0	0	0	0	0	0	0	0	0	0	0	0	0	0	0	0	0	0	0	0	0	0	0	70	0	0	0	0	0	0	0	0	0	0	0	0
3992	BC007846	FADS1	FADS1	1335	0	0	*	50	153	3945	6.30195	1	0	0	0	1	6.30195	0	0	0	0	0	0	0	0	0	0	0	0	0	0	0	0	0	0	0	0	0	0	0	0	19	0	0	0	0	0	0	0
533	BC000423	ATP6V0B	ATP6V0B	618	0	0	*	5484	7003	504	-3.44373	0	20533	1.5519	1	1	0	0	0	0	0	0	0	0	0	0	0	0	3105	-1.17338	0	0	0	0	0	0	299	0	0	0	0	0	0	0	10301	0.556739	0	0	0
527	BC010147	ATP6V0C	ATP6V0C	339	0	0	*	7138	7739	8795	0.301164	0	8992	0.216495	0	0	0	0	0	0	4909	-0.656718	0	0	0	445	0	0	0	0	0	0	0	10281	0.526389	0	10403	0.426781	0	0	0	0	0	0	4777	-0.696042	0	0	0
874	BC002812	CBR3	CBR3	834	0	0	*	2286	936	0	0	0	0	0	0	0	0	0	0	0	0	0	0	0	0	0	0	0	8303	3.14905	1	1	0	1622	-0.495052	0	4345	2.21478	1	1	0	0	0	0	12267	3.71213	1	1	0
525	BC035978	ATP6V1B1	ATP6V1B1	783	0	0	*	2232	2556	0	0	0	0	0	0	0	0	0	0	0	15	0	0	0	0	0	0	0	3679	0.525426	0	0	0	0	0	0	0	0	0	0	0	0	0	0	0	0	0	0	0
8535	BC014967	CBX4	CBX4	873	1	0	NA	19308	10258	4749	-2.0235	0	22892	1.15809	0	0	0	2411	-3.0015	0	27012	1.39685	0	0	0	4290	-2.17015	0	45502	2.14918	1	1	0	11422	-0.757383	0	29103	1.50442	1	1	0	8800	-1.13362	0	33644	1.7136	1	1	0
528	BC010960	ATP6V1C1	ATP6V1C1	1149	0	0	*	50	159	0	0	0	0	0	0	0	0	0	0	0	0	0	0	0	0	0	0	0	0	0	0	0	0	0	0	0	0	0	0	0	0	0	0	0	0	0	0	0	0
51382	BC025373	ATP6V1D	ATP6V1D	744	0	0	*	6112	1414	80	0	0	0	0	0	0	0	0	0	0	0	0	0	0	0	181	0	0	0	0	0	0	0	0	0	0	0	0	0	0	0	0	0	0	0	0	0	0	0
374868	BC053561	ATP9B	ATP9B	411	0	0	*	50	147	3	0	0	0	0	0	0	0	0	0	0	0	0	0	0	0	0	0	0	0	0	0	0	0	461	0	0	0	0	0	0	0	0	0	0	0	0	0	0	0
91647	BC004114	ATPAF2	ATPAF2	870	0	0	*	2518	8089	10768	2.0964	1	4395	-0.880098	0	1	0	0	0	0	4615	-0.809631	0	0	0	0	0	0	0	0	0	0	0	17520	2.79865	1	14360	0.828022	0	1	0	0	0	0	14	0	0	0	0
51374	BC011006	C2orf28	ATRAID	516	0	0	*	949	59	11	0	0	0	0	0	0	0	0	0	0	0	0	0	0	0	0	0	0	43	0	0	0	0	155	0	0	11	0	0	0	0	424	0	0	14	0	0	0	0
4287	BC033711	ATXN3	ATXN3	1113	0	0	*	3319	1214	0	0	0	4331	1.83493	1	1	0	55	0	0	3797	1.64509	1	1	0	382	0	0	0	0	0	0	0	0	0	0	0	0	0	0	0	0	0	0	0	0	0	0	0
549	BC020722	AUH	AUH	933	0	0	*	922	69	0	0	0	0	0	0	0	0	0	0	0	0	0	0	0	0	1	0	0	0	0	0	0	0	0	0	0	0	0	0	0	0	0	0	0	2146	4.95891	1	1	0
79000	BC000209	C1orf135	AUNIP	1074	0	0	*	436	612	0	0	0	0	0	0	0	0	0	0	0	5619	3.19871	1	1	0	0	0	0	0	0	0	0	0	0	0	0	0	0	0	0	0	0	0	0	0	0	0	0	0
133957	BC015349	LOC133957	CCDC127	783	0	0	*	2221	1295	0	0	0	0	0	0	0	0	384	0	0	0	0	0	0	0	0	0	0	12331	3.25127	1	1	0	0	0	0	31	0	0	0	0	0	0	0	928	-0.480755	0	0	0
54998	BC062333	AURKAIP1	AURKAIP1	600	0	0	*	50	315	2328	5.54102	1	0	0	0	1	0	0	0	0	0	0	0	0	0	0	0	0	0	0	0	0	0	0	0	0	0	0	0	0	0	0	0	0	0	0	0	0	0
10677	BC004134	AVIL	AVIL	2991	0	0	*	169	50	1439	3.08997	1	0	0	0	1	0	0	0	0	0	0	0	0	0	0	0	0	0	0	0	0	0	0	0	0	0	0	0	0	0	0	0	0	1149	4.52231	1	1	0
60370	BC000877	AVPI1	AVPI1	444	0	0	*	472	381	3241	2.77958	1	0	0	0	1	0	1863	1.98077	1	0	0	0	1	0	1	0	0	0	0	0	0	0	0	0	0	0	0	0	0	0	0	0	0	0	0	0	0	0
563	BC033830	AZGP1	AZGP1	897	0	0	*	1859	2550	0	0	0	0	0	0	0	0	0	0	0	13583	2.41323	1	1	0	0	0	0	0	0	0	0	0	0	0	0	0	0	0	0	0	3274	0.816528	0	2160	-0.239466	0	0	0
566	BC069495	AZU1	AZU1	756	0	0	*	6397	8046	0	0	0	731	-3.46033	0	0	0	2466	-1.37522	0	6421	-0.325474	0	0	0	193	0	0	2326	-1.79042	0	0	0	2778	-1.20335	0	2839	-1.50289	0	0	0	0	0	0	3904	-1.04332	0	0	0
79140	BC002462	CCDC28B	CCDC28B	726	0	0	*	10662	7156	11918	0.160664	0	11588	0.695406	0	0	0	13479	0.338235	0	0	0	0	0	0	5043	-1.08012	0	27972	1.96676	1	1	0	0	0	0	9274	0.374038	0	0	0	0	0	0	14122	0.980719	0	0	0
8707	BC022507	B3GALT2	B3GALT2	1269	0	0	*	616	1876	0	0	0	0	0	0	0	0	0	0	0	0	0	0	0	0	0	0	0	0	0	0	0	0	0	0	0	0	0	0	0	0	0	0	0	55	0	0	0	0
8705	BC032574	B3GALT4	B3GALT4	1137	0	0	*	1025	159	0	0	0	0	0	0	0	0	0	0	0	0	0	0	0	0	0	0	0	0	0	0	0	0	0	0	0	0	0	0	0	0	0	0	0	0	0	0	0	0
26229	BC007906	B3GAT3	B3GAT3	1008	0	0	*	1658	1289	0	0	0	0	0	0	0	0	0	0	0	0	0	0	0	0	0	0	0	0	0	0	0	0	0	0	0	0	0	0	0	0	0	0	0	0	0	0	0	0
9331	BC069620	B4GALT6	B4GALT6	1032	0	0	*	1702	752	0	0	0	0	0	0	0	0	0	0	0	123	0	0	0	0	0	0	0	0	0	0	0	0	0	0	0	0	0	0	0	0	0	0	0	7850	3.38389	1	1	0
11285	BC007317	B4GALT7	B4GALT7	984	0	0	*	3532	3648	0	0	0	0	0	0	0	0	0	0	0	0	0	0	0	0	385	0	0	0	0	0	0	0	0	0	0	0	0	0	0	0	0	0	0	0	0	0	0	0
3075	BC020687	CFH	CFH	588	0	0	*	50	265	0	0	0	0	0	0	0	0	0	0	0	0	0	0	0	0	0	0	0	0	0	0	0	0	8178	7.35368	1	0	0	0	1	7.35368	0	0	0	0	0	0	0	0
157556	BC029562	C8orf56	BAALC-AS2	318	0	0	*	3632	1099	0	0	0	0	0	0	0	0	0	0	0	0	0	0	0	0	0	0	0	0	0	0	0	0	0	0	0	0	0	0	0	0	0	0	0	0	0	0	0	0
208	BC063421	AKT2	AKT2	444	0	0	*	50	967	0	0	0	0	0	0	0	0	7233	7.17652	1	0	0	0	1	7.17652	0	0	0	743	-0.380154	0	0	0	0	0	0	0	0	0	0	0	0	0	0	0	0	0	0	0
573	BC014774	BAG1	BAG1	825	1	1	Unknown	4687	2250	0	0	0	0	0	0	0	0	0	0	0	0	0	0	0	0	981	-2.25634	0	0	0	0	0	0	0	0	0	0	0	0	0	0	0	0	0	0	0	0	0	0
9529	BC050551	BAG5	BAG5	1344	0	0	*	6752	5886	0	0	0	6675	0.18148	0	0	0	1589	-2.0872	0	23956	2.02503	1	1	0	0	0	0	0	0	0	0	0	0	0	0	42	0	0	0	0	3984	-0.761097	0	9692	0.719507	0	0	0
10458	BC032559	BAIAP2	BAIAP2	1539	0	0	*	1800	1507	0	0	0	0	0	0	0	0	0	0	0	15	0	0	0	0	0	0	0	0	0	0	0	0	0	0	0	0	0	0	0	0	6	0	0	0	0	0	0	0
25805	BC019252	BAMBI	BAMBI	783	0	0	*	50	50	0	0	0	0	0	0	0	0	2192	5.45418	1	0	0	0	1	0	0	0	0	0	0	0	0	0	0	0	0	2691	5.75007	1	1	0	0	0	0	0	0	0	0	0
90416	BC001673	MGC20481	CCDC32	558	0	0	*	2942	1367	0	0	0	8165	2.57844	1	1	0	0	0	0	1482	0.116532	0	0	0	3261	0.148517	0	6308	2.20617	1	1	0	563	-2.38559	0	0	0	0	0	0	0	0	0	0	0	0	0	0
10538	BC032294	BATF	BATF	378	1	1	bZIP	2532	1511	5421	1.09828	0	4444	1.55636	1	1	0	5260	1.05479	0	0	0	0	0	0	1683	-0.589242	0	18	0	0	0	0	0	0	0	9836	2.70257	1	1	0	6105	1.26971	0	0	0	0	0	0
581	BC014175	BAX	BAX	579	0	0	*	5418	3964	0	0	0	0	0	0	0	0	0	0	0	4368	0.140016	0	0	0	700	-2.95233	0	0	0	0	0	0	0	0	0	2294	-0.789092	0	0	0	893	-2.60103	0	7269	0.8748	0	0	0
8424	BC011034	BBOX1	BBOX1	1164	0	0	*	544	477	0	0	0	0	0	0	0	0	0	0	0	108	0	0	0	0	0	0	0	0	0	0	0	0	0	0	0	0	0	0	0	0	0	0	0	0	0	0	0	0
27241	BC032715	PTHB1	BBS9	933	0	0	*	93	440	0	0	0	0	0	0	0	0	0	0	0	0	0	0	0	0	0	0	0	0	0	0	0	0	0	0	0	0	0	0	0	0	0	0	0	0	0	0	0	0
10134	BC014323	BCAP31	BCAP31	741	0	0	*	90	209	251	0	0	0	0	0	0	0	0	0	0	633	1.5987	1	1	0	0	0	0	0	0	0	0	0	0	0	0	39	0	0	0	0	0	0	0	0	0	0	0	0
54828	BC001250	BCAS3	BCAS3	1173	0	0	*	96	1676	56	0	0	0	0	0	0	0	0	0	0	0	0	0	0	0	0	0	0	0	0	0	0	0	0	0	0	0	0	0	0	0	0	0	0	0	0	0	0	0
91057	BC008496	NY-REN-41	CCDC34	690	0	0	*	958	296	0	0	0	0	0	0	0	0	0	0	0	0	0	0	0	0	0	0	0	3790	3.67853	1	1	0	0	0	0	0	0	0	0	0	0	0	0	0	0	0	0	0
590	BC018141	BCHE	BCHE	1809	0	0	*	50	821	0	0	0	0	0	0	0	0	0	0	0	0	0	0	0	0	0	0	0	0	0	0	0	0	0	0	0	0	0	0	0	0	0	0	0	0	0	0	0	0
84692	BC030780	NYD-SP17	CCDC54	987	0	0	*	436	593	40	0	0	0	0	0	0	0	0	0	0	0	0	0	0	0	0	0	0	2937	2.30824	1	1	0	0	0	0	0	0	0	0	0	0	0	0	0	0	0	0	0
79080	BC001378	MGC2574	CCDC86	1083	0	0	*	50	499	0	0	0	10967	4.45799	1	1	0	0	0	0	0	0	0	0	0	0	0	0	8716	4.12655	1	1	0	0	0	0	0	0	0	0	0	408	0	0	858	0.781938	0	0	0
597	BC016281	BCL2A1	BCL2A1	528	0	0	*	1021	2206	0	0	0	16500	2.90296	1	1	0	0	0	0	8150	1.88537	1	1	0	0	0	0	5880	1.41438	0	0	0	238	0	0	0	0	0	0	0	0	0	0	0	0	0	0	0
598	BC019307	BCL2L1	BCL2L1	702	0	0	*	2722	3692	0	0	0	0	0	0	0	0	603	-2.17444	0	309	0	0	0	0	0	0	0	0	0	0	0	0	0	0	0	0	0	0	0	0	0	0	0	0	0	0	0	0
83596	BC007724	BCL2L12	BCL2L12	753	0	0	*	147	247	0	0	0	0	0	0	0	0	0	0	0	0	0	0	0	0	0	0	0	0	0	0	0	0	0	0	0	0	0	0	0	0	0	0	0	0	0	0	0	0
9275	BC009548	BCL7B	BCL7B	609	0	0	*	902	309	163	0	0	0	0	0	0	0	0	0	0	0	0	0	0	0	0	0	0	0	0	0	0	0	0	0	0	1677	2.4402	1	1	0	0	0	0	0	0	0	0	0
9274	BC058863	BCL7C	BCL7C	729	0	0	*	1735	1979	0	0	0	0	0	0	0	0	5753	1.72938	1	0	0	0	1	0	0	0	0	21	0	0	0	0	2540	0.549893	0	1721	-0.201525	0	0	0	0	0	0	2755	0.477281	0	0	0
83875	BC041656	BCDO2	BCO2	1452	0	0	*	2880	634	0	0	0	0	0	0	0	0	0	0	0	0	0	0	0	0	0	0	0	0	0	0	0	0	0	0	0	0	0	0	0	0	0	0	0	0	0	0	0	0
55176	BC026179	SEC61A2	SEC61A2	1257	0	0	*	50	889	6401	7.00023	1	0	0	0	1	7.00023	0	0	0	0	0	0	0	0	0	0	0	0	0	0	0	0	936	4.22651	1	0	0	0	1	0	0	0	0	0	0	0	0	0
56898	BC001953	DHRS6	BDH2	738	0	0	*	7022	7496	11643	0.729509	0	18075	1.2698	0	0	0	0	0	0	5109	-0.55308	0	0	0	0	0	0	5855	-0.356452	0	0	0	226	0	0	7964	0.0873723	0	0	0	3815	-0.880199	0	5386	-0.476907	0	0	0
6363	BC027968	CCL19	CCL19	297	0	0	*	1233	1017	0	0	0	6636	2.70599	1	1	0	0	0	0	0	0	0	0	0	0	0	0	3383	1.73398	1	1	0	0	0	0	0	0	0	0	0	0	0	0	0	0	0	0	0
6347	BC009716	CCL2	CCL2	300	0	0	*	2935	2416	0	0	0	0	0	0	0	0	0	0	0	0	0	0	0	0	3490	0.249867	0	12640	2.3873	1	1	0	8313	1.50201	1	1213	-0.994041	0	1	0	0	0	0	3267	0.435346	0	0	0
79656	BC007932	C1orf165	BEND5	1266	0	0	*	1789	146	0	0	0	0	0	0	0	0	0	0	0	0	0	0	0	0	0	0	0	0	0	0	0	0	0	0	0	1601	3.45493	1	1	0	2470	0.465358	0	0	0	0	0	0
222389	BC031618	C10orf30	BEND7	1098	0	0	*	1034	190	0	0	0	0	0	0	0	0	0	0	0	0	0	0	0	0	0	0	0	0	0	0	0	0	0	0	0	0	0	0	0	0	333	0	0	0	0	0	0	0
892	BC010135	CCNC	CCNC	852	1	1	NA	3304	2943	1652	-1	0	12790	2.11966	1	1	0	1096	-1.59197	0	1358	-1.1158	0	0	0	6161	0.898951	0	13190	2.16409	1	1	0	47	0	0	12466	2.08264	1	1	0	10677	1.69222	1	1551	-0.924089	0	1	0
144453	BC028087	VMD2L3	BEST3	807	0	0	*	254	4023	0	0	0	5232	0.379091	0	0	0	8712	5.1001	1	9601	1.25491	0	1	0	3	0	0	2127	-0.919452	0	0	0	0	0	0	4535	0.172831	0	0	0	0	0	0	2769	-0.538907	0	0	0
27018	BC003190	NGFRAP1	BEX3	336	0	0	*	2166	4713	4065	0.908222	0	0	0	0	0	0	0	0	0	0	0	0	0	0	108	0	0	6402	0.441877	0	0	0	0	0	0	1143	-2.04382	0	0	0	0	0	0	4763	0.0152249	0	0	0
54619	BC043175	CCNJ	CCNJ	1119	0	0	*	717	986	1078	0.588312	0	0	0	0	0	0	110	0	0	0	0	0	0	0	1070	0.577566	0	2946	1.5791	1	1	0	88	0	0	1928	0.967445	0	0	0	0	0	0	6895	2.80589	1	1	0
635	BC012616	BHMT	BHMT	1221	0	0	*	50	50	0	0	0	0	0	0	0	0	0	0	0	0	0	0	0	0	0	0	0	0	0	0	0	0	0	0	0	0	0	0	0	0	0	0	0	0	0	0	0	0
23743	BC020665	BHMT2	BHMT2	1092	0	0	*	2071	652	0	0	0	0	0	0	0	0	0	0	0	0	0	0	0	0	0	0	0	0	0	0	0	0	0	0	0	0	0	0	0	0	0	0	0	0	0	0	0	0
23708	BC036077	GSPT2	GSPT2	1887	0	0	*	50	939	5469	6.77321	1	234	-2.00462	0	1	6.77321	0	0	0	0	0	0	0	0	0	0	0	446	0	0	0	0	0	0	0	0	0	0	0	0	0	0	0	0	0	0	0	0
638	BC001599	BIK	BIK	483	0	0	*	1734	599	0	0	0	0	0	0	0	0	1260	-0.46068	0	0	0	0	0	0	0	0	0	0	0	0	0	0	0	0	0	0	0	0	0	0	0	0	0	2035	1.7644	1	1	0
51411	BC047686	BIN2	BIN2	1698	0	0	*	1617	424	0	0	0	0	0	0	0	0	0	0	0	0	0	0	0	0	0	0	0	0	0	0	0	0	0	0	0	0	0	0	0	0	0	0	0	0	0	0	0	0
55909	BC009824	BIN3	BIN3	762	0	0	*	524	596	0	0	0	0	0	0	0	0	0	0	0	0	0	0	0	0	0	0	0	532	-0.163886	0	0	0	0	0	0	0	0	0	0	0	0	0	0	0	0	0	0	0
10626	BC053514	TRIM16	TRIM16	1695	1	0	NA	50	1049	11134	7.79883	1	0	0	0	1	7.79883	0	0	0	0	0	0	0	0	10187	7.67059	1	0	0	0	1	7.67059	5784	6.854	1	0	0	0	1	6.854	5401	6.75515	1	0	0	0	1	6.75515
79444	BC014475	BIRC7	BIRC7	897	0	0	*	75	115	0	0	0	0	0	0	0	0	0	0	0	108	0	0	0	0	0	0	0	196	0	0	0	0	0	0	0	0	0	0	0	0	0	0	0	263	0	0	0	0
640	BC007371	BLK	BLK	1518	0	0	*	2294	318	0	0	0	0	0	0	0	0	0	0	0	0	0	0	0	0	0	0	0	0	0	0	0	0	73	0	0	0	0	0	0	0	0	0	0	0	0	0	0	0
50489	BC022278	CD207	CD207	987	0	0	*	1616	1626	43	0	0	0	0	0	0	0	4986	1.62546	1	0	0	0	1	0	0	0	0	9550	2.55417	1	1	0	0	0	0	0	0	0	0	0	5296	1.71248	1	0	0	0	1	0
644	BC008456	BLVRA	BLVRA	891	0	0	*	5732	6048	1535	-1.9008	0	0	0	0	0	0	6959	0.279841	0	0	0	0	0	0	3588	-0.675859	0	3013	-1.00526	0	0	0	0	0	0	11418	0.91678	0	0	0	3338	-0.780055	0	941	-2.68419	0	0	0
89927	BC008967	C16orf45	BMERB1	615	0	0	*	8102	5109	8307	0.0360495	0	0	0	0	0	0	6027	-0.426838	0	0	0	0	0	0	0	0	0	0	0	0	0	0	9486	0.227522	0	0	0	0	0	0	0	0	0	0	0	0	0	0
90427	BC069505	BMF	BMF	555	0	0	*	5508	5490	5533	0.00653336	0	0	0	0	0	0	6740	0.29122	0	0	0	0	0	0	496	0	0	0	0	0	0	0	0	0	0	6117	0.156018	0	0	0	0	0	0	0	0	0	0	0
952	BC007964	CD38	CD38	903	0	0	*	289	50	0	0	0	0	0	0	0	0	0	0	0	0	0	0	0	0	0	0	0	544	3.44361	1	1	0	0	0	0	0	0	0	0	0	0	0	0	0	0	0	0	0
246184	BC066300	CDC26	CDC26	258	0	0	*	2942	287	0	0	0	1149	2.00126	1	1	0	0	0	0	0	0	0	0	0	4	0	0	1109	1.95014	1	1	0	44	0	0	0	0	0	0	0	0	0	0	138	0	0	0	0
2623	BC009797	GATA1	GATA1	1008	1	1	GATA	50	911	9780	7.61176	1	0	0	0	1	7.61176	5973	6.90038	1	0	0	0	1	6.90038	6091	6.92861	1	0	0	0	1	6.92861	8897	7.47525	1	0	0	0	1	7.47525	6255	6.96694	1	2201	1.27264	0	1	6.96694
655	BC008584	BMP7	BMP7	1296	1	1	Unknown	4045	3864	0	0	0	0	0	0	0	0	0	0	0	1050	-1.87971	0	0	0	0	0	0	0	0	0	0	0	2810	-0.52557	0	0	0	0	0	0	14772	1.86865	1	4541	0.232915	0	1	0
662	BC010959	BNIP1	BNIP1	687	0	0	*	626	3352	0	0	0	0	0	0	0	0	0	0	0	0	0	0	0	0	0	0	0	0	0	0	0	0	0	0	0	1093	-1.61673	0	0	0	0	0	0	0	0	0	0	0
664	BC021989	BNIP3	BNIP3	585	0	0	*	2053	755	0	0	0	0	0	0	0	0	0	0	0	0	0	0	0	0	0	0	0	0	0	0	0	0	0	0	0	0	0	0	0	0	0	0	0	0	0	0	0	0
54810	BC036075	GIPC2	GIPC2	948	0	0	*	50	94	0	0	0	0	0	0	0	0	4986	6.63981	1	0	0	0	1	6.63981	0	0	0	571	2.60276	1	1	0	0	0	0	0	0	0	0	0	0	0	0	0	0	0	0	0
91653	BC034614	BOC	BOC	474	0	0	*	3606	1941	0	0	0	0	0	0	0	0	0	0	0	0	0	0	0	0	0	0	0	0	0	0	0	0	0	0	0	0	0	0	0	0	0	0	0	2769	0.512565	0	0	0
118426	BC013668	LOH12CR1	BORCS5	591	0	0	*	2083	153	0	0	0	0	0	0	0	0	0	0	0	4970	5.02164	1	1	0	0	0	0	0	0	0	0	0	296	0	0	0	0	0	0	0	0	0	0	0	0	0	0	0
54785	BC009261	FLJ20014	BORCS6	672	0	0	*	2572	2481	1564	-0.71765	0	0	0	0	0	0	658	-1.96673	0	3195	0.364894	0	0	0	444	0	0	0	0	0	0	0	12	0	0	1355	-0.872629	0	0	0	0	0	0	0	0	0	0	0
119032	BC015994	C10orf32	BORCS7	318	0	0	*	2747	4372	6046	1.13812	0	5512	0.334282	0	0	0	1863	-0.560229	0	8119	0.893009	0	0	0	3630	0.402113	0	0	0	0	0	0	0	0	0	1481	-1.56172	0	0	0	0	0	0	9193	1.07224	0	0	0
55143	BC016944	CDCA8	CDCA8	843	0	0	*	5002	3292	0	0	0	0	0	0	0	0	4219	-0.245604	0	5186	0.655658	0	0	0	4810	-0.0564682	0	9462	1.52318	1	1	0	4506	-0.150658	0	4440	0.431595	0	0	0	2565	-0.963546	0	0	0	0	0	0
92747	BC008429	C20orf114	BPIFB1	1455	0	0	*	70	100	0	0	0	0	0	0	0	0	0	0	0	0	0	0	0	0	0	0	0	0	0	0	0	0	0	0	0	0	0	0	0	0	0	0	0	0	0	0	0	0
65980	BC041590	BRD9	BRD9	1446	1	0	Unknown	68	833	0	0	0	0	0	0	0	0	0	0	0	0	0	0	0	0	0	0	0	596	-0.483004	0	0	0	23	0	0	0	0	0	0	0	0	0	0	0	0	0	0	0
2972	BC016743	BRF1	BRF1	627	1	1	Unknown	3030	3190	4602	0.602943	0	0	0	0	0	0	0	0	0	2593	-0.298934	0	0	0	0	0	0	0	0	0	0	0	0	0	0	383	0	0	0	0	0	0	0	0	0	0	0	0
65061	BC038807	ALS2CR7	CDK15	1050	0	0	*	1056	1036	2221	1.0726	0	0	0	0	0	0	438	0	0	7316	2.82003	1	1	0	112	0	0	11442	3.46524	1	1	0	0	0	0	425	0	0	0	0	366	0	0	97	0	0	0	0
25798	BC018737	BRI3	BRI3	378	0	0	*	2141	50	0	0	0	0	0	0	0	0	0	0	0	0	0	0	0	0	0	0	0	0	0	0	0	0	0	0	0	590	3.56071	1	1	0	0	0	0	0	0	0	0	0
23436	BC005216	ELA3B	CELA3B	813	0	0	*	9029	7562	6230	-0.535334	0	5966	-0.342004	0	0	0	219	0	0	5526	-0.452532	0	0	0	3642	-1.30984	0	21915	1.53508	1	1	0	9952	0.14042	0	0	0	0	0	0	0	0	0	6355	-0.250876	0	0	0
1620	BC021560	DBC1	BRINP1	963	0	0	*	1675	1760	336	0	0	6356	1.85254	1	1	0	3562	1.08853	0	2917	0.72891	0	0	0	122	0	0	0	0	0	0	0	323	0	0	2562	0.541695	0	0	0	0	0	0	0	0	0	0	0
25855	BC009834	BRMS1	BRMS1	741	1	0	Unknown	50	1329	0	0	0	7225	2.44266	1	1	0	0	0	0	0	0	0	0	0	0	0	0	3	0	0	0	0	0	0	0	3	0	0	0	0	0	0	0	568	-1.22638	0	0	0
84446	BC016681	BRSK1	BRSK1	1422	0	0	*	50	474	801	4.0018	1	0	0	0	1	0	0	0	0	0	0	0	0	0	0	0	0	0	0	0	0	0	0	0	0	0	0	0	0	0	0	0	0	83	0	0	0	0
26580	BC009866	BSCL2	BSCL2	1395	0	0	*	5528	2459	67	0	0	1798	-0.451679	0	0	0	15397	1.47782	0	0	0	0	0	0	3855	-0.520027	0	0	0	0	0	0	0	0	0	4521	0.87857	0	0	0	0	0	0	2547	0.0507272	0	0	0
684	BC033873	BST2	BST2	543	0	0	*	2499	1972	1057	-1.24138	0	0	0	0	0	0	0	0	0	4909	1.31577	0	0	0	0	0	0	1348	-0.548839	0	0	0	0	0	0	5952	1.59371	1	1	0	1115	-1.16431	0	1828	-0.109393	0	0	0
65992	BC000643	C20orf116	DDRGK1	945	1	0	Unknown	50	1623	3115	5.96116	1	0	0	0	1	0	2301	5.52419	1	15	0	0	1	0	0	0	0	434	0	0	0	0	5957	6.89651	1	0	0	0	1	6.89651	0	0	0	2672	0.719257	0	0	0
91408	BC022371	BTF3L4	BTF3L4	477	0	0	*	1595	652	0	0	0	0	0	0	0	0	0	0	0	0	0	0	0	0	0	0	0	0	0	0	0	0	0	0	0	0	0	0	0	0	0	0	0	0	0	0	0	0
503543	BC062736	LOC503543	BTF3P9	309	0	0	*	3425	4691	0	0	0	0	0	0	0	0	0	0	0	8551	0.866198	0	0	0	30	0	0	8869	0.918876	0	0	0	15575	2.18506	1	6421	0.452902	0	1	0	0	0	0	0	0	0	0	0
694	BC016759	BTG1	BTG1	516	1	1	NA	12144	7431	0	0	0	9445	0.345994	0	0	0	26740	1.13876	0	5788	-0.360491	0	0	0	12083	-0.007265	0	7078	-0.0702146	0	0	0	9750	-0.31677	0	4611	-0.688477	0	0	0	17578	0.533527	0	9442	0.345536	0	0	0
54766	BC031045	BTG4	BTG4	621	0	0	*	464	137	0	0	0	0	0	0	0	0	0	0	0	0	0	0	0	0	0	0	0	0	0	0	0	0	0	0	0	0	0	0	0	0	0	0	0	0	0	0	0	0
10385	BC014021	BTN2A2	BTN2A2	1572	0	0	*	1305	471	0	0	0	0	0	0	0	0	0	0	0	494	0	0	0	0	0	0	0	0	0	0	0	0	0	0	0	0	0	0	0	0	0	0	0	0	0	0	0	0
153579	BC062459	BTNL9	BTNL9	1035	0	0	*	50	331	0	0	0	0	0	0	0	0	0	0	0	0	0	0	0	0	0	0	0	0	0	0	0	0	0	0	0	595	0.846058	0	0	0	574	3.52105	1	0	0	0	1	0
84811	BC006350	MGC13125	BUD13	1860	0	0	*	924	50	0	0	0	0	0	0	0	0	8110	3.13374	1	0	0	0	1	0	644	-0.520832	0	0	0	0	0	0	0	0	0	0	0	0	0	0	0	0	0	0	0	0	0	0
114049	BC011696	WBSCR22	BUD23	846	0	0	*	3118	5128	0	0	0	0	0	0	0	0	0	0	0	1312	-1.96663	0	0	0	0	0	0	0	0	0	0	0	446	0	0	3675	-0.480652	0	0	0	10907	1.80656	1	8542	0.736178	0	1	0
8896	BC022821	G10	BUD31	435	1	0	Unknown	1615	902	4335	1.4245	0	0	0	0	0	0	2575	0.673038	0	0	0	0	0	0	2830	0.809268	0	0	0	0	0	0	4951	1.61619	1	0	0	0	1	0	10106	2.64561	1	0	0	0	1	0
11149	BC040502	BVES	BVES	870	0	0	*	10348	14690	17364	0.746747	0	0	0	0	0	0	22192	1.10069	0	0	0	0	0	0	653	-3.98613	0	8786	-0.741556	0	0	0	9947	-0.0570186	0	27457	0.90234	0	0	0	6	0	0	23190	0.658668	0	0	0
28969	BC003056	BZW2	BZW2	1260	1	0	NA	763	281	0	0	0	0	0	0	0	0	0	0	0	0	0	0	0	0	0	0	0	0	0	0	0	0	0	0	0	0	0	0	0	0	0	0	0	0	0	0	0	0
282966	BC028127	C10orf53	C10orf53	474	0	0	*	994	247	0	0	0	0	0	0	0	0	0	0	0	0	0	0	0	0	0	0	0	0	0	0	0	0	0	0	0	0	0	0	0	0	0	0	0	0	0	0	0	0
5199	BC015756	PFC	CFP	1410	0	0	*	3669	896	0	0	0	1851	1.04673	0	0	0	0	0	0	8042	3.16598	1	1	0	0	0	0	6268	2.80643	1	1	0	965	-1.92679	0	0	0	0	0	0	0	0	0	14	0	0	0	0
64776	BC020628	C11orf1	C11orf1	453	0	0	*	606	1473	0	0	0	0	0	0	0	0	0	0	0	0	0	0	0	0	0	0	0	0	0	0	0	0	1604	1.40428	0	0	0	0	0	0	1675	1.46677	0	665	-1.14733	0	0	0
50515	BC013315	CHST11	CHST11	1059	0	0	*	8225	4688	7084	-0.215451	0	1181	-1.98896	0	0	0	5918	-0.474906	0	12796	1.44865	0	0	0	1553	-2.40496	0	28186	2.58793	1	1	0	4485	-0.874908	0	6544	0.4812	0	0	0	0	0	0	8695	0.891213	0	0	0
64377	BC011380	CHST8	CHST8	1275	0	0	*	798	1049	0	0	0	0	0	0	0	0	0	0	0	0	0	0	0	0	0	0	0	9642	3.20032	1	1	0	0	0	0	0	0	0	0	0	0	0	0	0	0	0	0	0
160298	BC031612	MGC34805	C11orf42	1002	0	0	*	2798	1217	0	0	0	0	0	0	0	0	1863	-0.586768	0	2099	0.786373	0	0	0	0	0	0	0	0	0	0	0	0	0	0	1545	0.344278	0	0	0	0	0	0	2298	0.91705	0	0	0
79096	BC013988	MGC4707	C11orf49	1014	0	0	*	5891	6310	14126	1.26177	0	0	0	0	0	0	0	0	0	9894	0.648914	0	0	0	0	0	0	1559	-2.01702	0	0	0	0	0	0	0	0	0	0	0	0	0	0	0	0	0	0	0
1674	BC032116	DES	DES	1413	0	0	*	50	565	0	0	0	6640	3.55486	1	1	0	1808	5.17632	1	0	0	0	1	0	0	0	0	920	0.703383	0	0	0	0	0	0	8724	3.94867	1	1	0	0	0	0	0	0	0	0	0
23562	BC012126	CLDN14	CLDN14	720	0	0	*	103	593	40	0	0	0	0	0	0	0	55	0	0	0	0	0	0	0	0	0	0	2915	2.29739	1	1	0	0	0	0	746	0.331144	0	0	0	0	0	0	0	0	0	0	0
54494	BC009041	FLJ20010	C11orf71	372	0	0	*	162	1183	0	0	0	0	0	0	0	0	0	0	0	15	0	0	0	0	0	0	0	0	0	0	0	0	0	0	0	0	0	0	0	0	0	0	0	0	0	0	0	0
119710	BC051031	LOC119710	C11orf74	666	0	0	*	1913	215	774	-1.30543	0	0	0	0	0	0	0	0	0	1852	3.10668	1	1	0	0	0	0	0	0	0	0	0	0	0	0	0	0	0	0	0	0	0	0	0	0	0	0	0
51129	BC023647	ANGPTL4	ANGPTL4	1221	0	0	*	50	268	0	0	0	0	0	0	0	0	4931	6.62381	1	0	0	0	1	6.62381	0	0	0	0	0	0	0	0	0	0	0	0	0	0	0	0	0	0	0	0	0	0	0	0
121053	BC032326	MGC40397	C12orf45	567	0	0	*	1417	1651	0	0	0	0	0	0	0	0	0	0	0	0	0	0	0	0	2211	0.641859	0	0	0	0	0	0	241	0	0	0	0	0	0	0	0	0	0	1648	-0.00262388	0	0	0
79794	BC019843	FLJ21415	C12orf49	618	0	0	*	1842	1177	0	0	0	0	0	0	0	0	0	0	0	0	0	0	0	0	0	0	0	669	-0.815036	0	0	0	0	0	0	0	0	0	0	0	0	0	0	0	0	0	0	0
160419	BC038413	FLJ35821	C12orf50	1245	0	0	*	50	549	0	0	0	0	0	0	0	0	0	0	0	0	0	0	0	0	0	0	0	0	0	0	0	0	0	0	0	0	0	0	0	0	0	0	0	0	0	0	0	0
91574	BC018145	FLJ38663	C12orf65	501	0	0	*	1119	587	0	0	0	0	0	0	0	0	0	0	0	0	0	0	0	0	0	0	0	52	0	0	0	0	0	0	0	0	0	0	0	0	0	0	0	0	0	0	0	0
144577	BC036246	FLJ32549	C12orf66	1407	0	0	*	1189	584	0	0	0	0	0	0	0	0	0	0	0	0	0	0	0	0	0	0	0	0	0	0	0	0	0	0	0	0	0	0	0	0	0	0	0	0	0	0	0	0
56967	BC042922	C14orf132	C14orf132	522	0	0	*	7310	5717	37	0	0	128	-5.48104	0	0	0	6027	-0.278431	0	0	0	0	0	0	1212	-2.59248	0	0	0	0	0	0	12114	0.728732	0	0	0	0	0	0	0	0	0	0	0	0	0	0
64755	BC009308	FLJ13868	C16orf58	1407	0	0	*	612	634	0	0	0	0	0	0	0	0	0	0	0	509	-0.316817	0	0	0	0	0	0	0	0	0	0	0	0	0	0	0	0	0	0	0	0	0	0	0	0	0	0	0
123970	BC021181	MGC33367	C16orf78	798	0	0	*	1324	1286	11980	3.17765	1	0	0	0	1	0	0	0	0	15	0	0	0	0	0	0	0	0	0	0	0	0	0	0	0	0	0	0	0	0	6	0	0	2589	1.0095	0	0	0
124944	BC040036	MGC49942	C17orf49	519	1	0	Myb/SANT	1498	2946	0	0	0	0	0	0	0	0	0	0	0	0	0	0	0	0	840	-0.834576	0	0	0	0	0	0	0	0	0	5756	0.966309	0	0	0	1860	0.312265	0	0	0	0	0	0
9075	BC014424	CLDN2	CLDN2	693	0	0	*	3164	2353	3673	0.215209	0	2029	-0.213732	0	0	0	1479	-1.09713	0	3859	0.713726	0	0	0	0	0	0	6665	1.5021	1	1	0	0	0	0	0	0	0	0	0	8046	1.34652	0	2741	0.220201	0	0	0
8349	BC069193	HIST2H2BE	HIST2H2BE	381	1	0	NA	50	858	6553	7.03408	1	1795	1.06493	0	1	7.03408	0	0	0	0	0	0	0	0	336	0	0	0	0	0	0	0	1015	4.34341	1	0	0	0	1	0	14	0	0	0	0	0	0	0
284099	BC034672	FLJ39647	C17orf78	828	0	0	*	2862	1798	16	0	0	0	0	0	0	0	0	0	0	0	0	0	0	0	2560	-0.16088	0	0	0	0	0	0	0	0	0	0	0	0	0	0	0	0	0	0	0	0	0	0
388407	BC046200	LOC388407	C17orf82	756	0	0	*	3370	2781	4567	0.438498	0	0	0	0	0	0	0	0	0	0	0	0	0	0	0	0	0	0	0	0	0	0	0	0	0	0	0	0	0	0	0	0	0	8764	1.65599	1	1	0
497661	BC022357	BC022357	C18orf32	231	0	0	*	4227	5349	803	-2.39616	0	5927	0.148033	0	0	0	0	0	0	62	0	0	0	0	615	-2.78098	0	13942	1.3821	0	0	0	26	0	0	10959	1.03478	0	0	0	738	-2.51794	0	125	0	0	0	0
162681	BC036054	C18orf54	C18orf54	1119	0	0	*	187	1202	0	0	0	0	0	0	0	0	0	0	0	0	0	0	0	0	0	0	0	0	0	0	0	0	0	0	0	0	0	0	0	0	0	0	0	12377	3.36415	1	1	0
148223	BC018441	C19orf25	C19orf25	357	1	0	NA	422	2191	3585	3.08666	1	3852	0.814018	0	1	0	0	0	0	123	0	0	0	0	0	0	0	0	0	0	0	0	106	0	0	1081	-1.01922	0	0	0	0	0	0	3087	0.494616	0	0	0
126526	BC023623	FLJ36888	C19orf47	846	0	0	*	1144	1130	0	0	0	0	0	0	0	0	0	0	0	0	0	0	0	0	0	0	0	2616	1.21104	0	0	0	0	0	0	0	0	0	0	0	0	0	0	0	0	0	0	0
84798	BC006151	MGC13170	C19orf48	354	0	0	*	2332	2007	0	0	0	0	0	0	0	0	14575	2.64386	1	0	0	0	1	0	0	0	0	0	0	0	0	0	7500	1.68532	1	22	0	0	1	0	0	0	0	55	0	0	0	0
28974	BC015465	HSPC023	C19orf53	300	0	0	*	2045	958	0	0	0	0	0	0	0	0	0	0	0	0	0	0	0	0	0	0	0	0	0	0	0	0	0	0	0	0	0	0	0	0	0	0	0	0	0	0	0	0
79173	BC002891	MGC11271	C19orf57	1002	0	0	*	1601	2094	0	0	0	0	0	0	0	0	0	0	0	0	0	0	0	0	0	0	0	3	0	0	0	0	0	0	0	0	0	0	0	0	1201	-0.414737	0	0	0	0	0	0
55150	BC051004	FLJ10490	C19orf73	390	0	0	*	9457	4188	0	0	0	0	0	0	0	0	0	0	0	0	0	0	0	0	1489	-2.66704	0	0	0	0	0	0	5318	-0.830499	0	0	0	0	0	0	6837	-0.468019	0	14	0	0	0	0
92346	BC038410	C1orf105	C1orf105	552	0	0	*	4822	1495	0	0	0	7785	2.38055	1	1	0	0	0	0	1374	-0.121763	0	0	0	4254	-0.180812	0	0	0	0	0	0	0	0	0	0	0	0	0	0	0	0	0	0	0	0	0	0
283971	BC039068	MGC34761	CLEC18C	906	0	0	*	158	705	0	0	0	0	0	0	0	0	0	0	0	911	0.369828	0	0	0	0	0	0	10336	3.87391	1	1	0	0	0	0	0	0	0	0	0	0	0	0	0	0	0	0	0
128061	BC036800	C1orf131	C1orf131	849	0	0	*	93	206	0	0	0	0	0	0	0	0	0	0	0	0	0	0	0	0	0	0	0	0	0	0	0	0	0	0	0	0	0	0	0	0	0	0	0	0	0	0	0	0
93190	BC029894	C1orf158	C1orf158	585	0	0	*	982	893	0	0	0	199	-2.16589	0	0	0	0	0	0	4739	2.40785	1	1	0	0	0	0	287	0	0	0	0	41	0	0	2107	1.23846	0	0	0	0	0	0	0	0	0	0	0
1212	BC006457	CLTB	CLTB	636	0	0	*	1198	524	13	0	0	11	0	0	0	0	219	0	0	14803	4.82018	1	1	0	3241	1.43581	0	9816	4.2275	1	1	0	1446	0.27144	0	7366	3.81324	1	1	0	252	0	0	0	0	0	0	0
128346	BC017973	C1orf162	C1orf162	468	0	0	*	50	350	0	0	0	0	0	0	0	0	0	0	0	15	0	0	0	0	0	0	0	0	0	0	0	0	0	0	0	0	0	0	0	0	0	0	0	0	0	0	0	0
149466	BC041633	MGC52423	C1orf210	342	0	0	*	907	559	0	0	0	0	0	0	0	0	0	0	0	7162	3.67944	1	1	0	0	0	0	0	0	0	0	0	0	0	0	0	0	0	0	0	0	0	0	0	0	0	0	0
127703	BC026909	FLJ38984	C1orf216	690	0	0	*	3857	2138	0	0	0	0	0	0	0	0	0	0	0	0	0	0	0	0	0	0	0	654	-1.7089	0	0	0	0	0	0	0	0	0	0	0	0	0	0	0	0	0	0	0
79169	BC002843	C1orf35	C1orf35	792	0	0	*	4658	1660	0	0	0	4785	1.52734	1	1	0	6794	0.544551	0	4029	1.27924	0	0	0	0	0	0	0	0	0	0	0	0	0	0	0	0	0	0	0	0	0	0	0	0	0	0	0
25912	BC008306	C1orf43	C1orf43	570	0	0	*	4944	3829	10706	1.11467	0	0	0	0	0	0	6685	0.435249	0	617	-2.63363	0	0	0	485	0	0	0	0	0	0	0	6990	0.499614	0	1073	-1.83532	0	0	0	0	0	0	817	-2.22856	0	0	0
79078	BC001711	C1orf50	C1orf50	600	0	0	*	56	144	0	0	0	0	0	0	0	0	0	0	0	0	0	0	0	0	0	0	0	0	0	0	0	0	0	0	0	0	0	0	0	0	0	0	0	0	0	0	0	0
79630	BC017761	C1orf54	C1orf54	396	0	0	*	3377	5805	0	0	0	12134	1.06369	0	0	0	0	0	0	1806	-1.6845	0	0	0	0	0	0	6271	0.111399	0	0	0	70	0	0	0	0	0	0	0	0	0	0	9152	0.656791	0	0	0
54964	BC002469	C1orf56	C1orf56	1026	0	0	*	50	156	0	0	0	32	0	0	0	0	0	0	0	0	0	0	0	0	0	0	0	0	0	0	0	0	754	3.91456	1	0	0	0	1	0	0	0	0	0	0	0	0	0
23403	BC021978	FBXO46	FBXO46	1419	0	0	*	50	75	0	0	0	0	0	0	0	0	0	0	0	0	0	0	0	0	0	0	0	0	0	0	0	0	0	0	0	0	0	0	0	0	8052	7.33128	1	0	0	0	1	7.33128
84970	BC064845	C1orf94	C1orf94	1227	0	0	*	1393	365	0	0	0	0	0	0	0	0	0	0	0	0	0	0	0	0	0	0	0	0	0	0	0	0	0	0	0	0	0	0	0	0	0	0	0	0	0	0	0	0
713	BC008983	C1QB	C1QB	762	0	0	*	1148	453	5875	2.35547	1	0	0	0	1	0	0	0	0	0	0	0	0	0	0	0	0	0	0	0	0	0	0	0	0	0	0	0	0	0	0	0	0	0	0	0	0	0
114897	BC021553	C1QTNF1	C1QTNF1	846	0	0	*	966	2884	6473	2.74434	1	0	0	0	1	0	0	0	0	0	0	0	0	0	0	0	0	0	0	0	0	0	53	0	0	0	0	0	0	0	0	0	0	0	0	0	0	0
124817	BC026187	FLJ40137	CNTD1	993	0	0	*	1201	315	0	0	0	0	0	0	0	0	0	0	0	15	0	0	0	0	0	0	0	7603	4.59315	1	1	0	1933	0.686605	0	0	0	0	0	0	0	0	0	0	0	0	0	0
114900	BC035628	C1QTNF4	C1QTNF4	990	0	0	*	1226	2063	37	0	0	5923	1.52158	1	1	0	0	0	0	0	0	0	0	0	0	0	0	871	-1.244	0	0	0	0	0	0	877	-1.2341	0	0	0	0	0	0	1357	-0.604323	0	0	0
114904	BC020551	C1QTNF6	C1QTNF6	837	0	0	*	1299	218	0	0	0	0	0	0	0	0	0	0	0	0	0	0	0	0	0	0	0	0	0	0	0	0	358	0	0	0	0	0	0	0	3169	1.28663	0	0	0	0	0	0
128653	BC021178	C20orf141	C20orf141	456	0	0	*	1533	1554	0	0	0	0	0	0	0	0	0	0	0	6761	2.12125	1	1	0	0	0	0	0	0	0	0	0	4995	1.70413	1	0	0	0	1	0	0	0	0	0	0	0	0	0
128864	BC032818	C20orf144	C20orf144	462	0	0	*	609	1255	0	0	0	6310	2.32995	1	1	0	3068	2.33278	1	401	0	0	1	0	0	0	0	0	0	0	0	0	0	0	0	4574	1.86577	1	1	0	0	0	0	291	0	0	0	0
140680	BC051762	C20orf96	C20orf96	786	0	0	*	737	1033	0	0	0	0	0	0	0	0	0	0	0	0	0	0	0	0	0	0	0	0	0	0	0	0	0	0	0	0	0	0	0	0	0	0	0	0	0	0	0	0
84645	BC031998	C22orf23	C22orf23	654	0	0	*	930	1092	0	0	0	0	0	0	0	0	0	0	0	0	0	0	0	0	0	0	0	0	0	0	0	0	0	0	0	3	0	0	0	0	69	0	0	0	0	0	0	0
79640	BC007210	FLJ23584	C22orf46	705	0	0	*	50	406	448	0	0	0	0	0	0	0	1260	4.65535	1	0	0	0	1	0	0	0	0	0	0	0	0	0	0	0	0	2059	2.34239	1	1	0	0	0	0	0	0	0	0	0
25966	BC062323	C21orf25	C2CD2	1167	0	0	*	1295	190	0	0	0	0	0	0	0	0	0	0	0	0	0	0	0	0	0	0	0	0	0	0	0	0	0	0	0	0	0	0	0	0	0	0	0	0	0	0	0	0
408029	BC043584	MGC50273	C2orf27B	630	0	0	*	3666	605	1142	-1.68264	0	0	0	0	0	0	0	0	0	15466	4.67602	1	1	0	403	0	0	0	0	0	0	0	9031	1.30068	0	0	0	0	0	0	0	0	0	0	0	0	0	0
205327	BC036456	FLJ38973	C2orf69	810	0	0	*	50	50	0	0	0	0	0	0	0	0	0	0	0	0	0	0	0	0	0	0	0	0	0	0	0	0	0	0	0	0	0	0	0	0	0	0	0	0	0	0	0	0
84281	BC005083	MGC13057	C2orf88	288	0	0	*	2287	321	0	0	0	0	0	0	0	0	0	0	0	0	0	0	0	0	0	0	0	0	0	0	0	0	0	0	0	0	0	0	0	0	0	0	0	0	0	0	0	0
25839	BC006306	COG4	COG4	1602	0	0	*	3707	300	0	0	0	0	0	0	0	0	0	0	0	0	0	0	0	0	0	0	0	6158	4.35943	1	1	0	0	0	0	0	0	0	0	0	0	0	0	0	0	0	0	0
51161	BC034766	C3orf18	C3orf18	489	0	0	*	429	1370	1941	2.17775	1	0	0	0	1	0	0	0	0	0	0	0	0	0	0	0	0	0	0	0	0	0	0	0	0	3079	1.16829	0	0	0	0	0	0	111	0	0	0	0
84077	BC038406	C3orf20	C3orf20	2349	0	0	*	1361	334	0	0	0	0	0	0	0	0	0	0	0	0	0	0	0	0	0	0	0	162	0	0	0	0	0	0	0	0	0	0	0	0	0	0	0	0	0	0	0	0
7464	BC000010	CORO2A	CORO2A	1578	0	0	*	4087	1542	0	0	0	117	-3.72022	0	0	0	5973	0.547413	0	540	-1.51377	0	0	0	0	0	0	6072	1.97737	1	1	0	0	0	0	0	0	0	0	0	0	0	0	0	0	0	0	0
375341	BC061697	FLJ43654	C3orf62	804	0	0	*	1843	100	0	0	0	0	0	0	0	0	0	0	0	0	0	0	0	0	0	0	0	0	0	0	0	0	0	0	0	0	0	0	0	0	0	0	0	0	0	0	0	0
55286	BC037906	FLJ11017	C4orf19	945	0	0	*	3350	5056	0	0	0	0	0	0	0	0	2356	-0.507822	0	31	0	0	0	0	1	0	0	8401	0.732565	0	0	0	0	0	0	7866	0.637634	0	0	0	0	0	0	0	0	0	0	0
401152	BC017399	LOC401152	C4orf3	201	0	0	*	8496	12543	13010	0.614765	0	234	-5.74423	0	0	0	3671	-1.21061	0	3334	-1.91156	0	0	0	12061	0.505494	0	376	0	0	0	0	21465	1.33713	0	11233	-0.159139	0	0	0	13020	0.615874	0	10093	-0.313527	0	0	0
132321	BC032582	LOC132321	C4orf33	600	0	0	*	2176	2284	0	0	0	0	0	0	0	0	0	0	0	0	0	0	0	0	0	0	0	0	0	0	0	0	0	0	0	542	-2.0752	0	0	0	0	0	0	0	0	0	0	0
728	BC008982	C5R1	C5AR1	1053	0	0	*	2772	3124	4989	0.847823	0	0	0	0	0	0	0	0	0	6498	1.0566	0	0	0	0	0	0	0	0	0	0	0	0	0	0	123	0	0	0	0	0	0	0	0	0	0	0	0
90355	BC009203	LOC90355	C5orf30	621	0	0	*	3445	1052	0	0	0	1859	0.821392	0	0	0	8877	1.36557	0	31	0	0	0	0	2098	-0.715489	0	0	0	0	0	0	0	0	0	7070	2.74858	1	1	0	0	0	0	9761	3.21389	1	1	0
1329	BC006229	COX5B	COX5B	390	0	0	*	5789	3505	4372	-0.405021	0	2259	-0.63373	0	0	0	55	0	0	0	0	0	0	0	0	0	0	14226	2.02104	1	1	0	9178	0.664866	0	0	0	0	0	0	0	0	0	0	0	0	0	0
221545	BC016167	C6orf136	C6orf136	519	0	0	*	10812	10595	5627	-0.942196	0	752	-3.81651	0	0	0	0	0	0	8505	-0.317	0	0	0	0	0	0	0	0	0	0	0	67	0	0	0	0	0	0	0	0	0	0	8861	-0.257842	0	0	0
135398	BC036917	C6orf141	C6orf141	714	0	0	*	168	911	0	0	0	0	0	0	0	0	0	0	0	0	0	0	0	0	0	0	0	0	0	0	0	0	0	0	0	0	0	0	0	0	0	0	0	0	0	0	0	0
404220	BC066986	C6orf201	C6orf201	396	0	0	*	212	272	0	0	0	0	0	0	0	0	55	0	0	0	0	0	0	0	0	0	0	0	0	0	0	0	0	0	0	0	0	0	0	0	0	0	0	0	0	0	0	0
221416	BC032706	MGC45491	C6orf223	672	0	0	*	2739	59	5603	1.03255	0	465	2.97844	1	1	0	0	0	0	679	3.52462	1	1	0	0	0	0	266	0	0	0	0	0	0	0	483	0	0	0	0	3	0	0	0	0	0	0	0
441150	BC060325	LOC441150	C6orf226	306	0	0	*	1160	605	0	0	0	0	0	0	0	0	0	0	0	0	0	0	0	0	0	0	0	0	0	0	0	0	0	0	0	0	0	0	0	0	0	0	0	0	0	0	0	0
136895	BC060879	C7orf31	C7orf31	1773	0	0	*	478	1086	0	0	0	21	0	0	0	0	0	0	0	0	0	0	0	0	0	0	0	0	0	0	0	0	0	0	0	53	0	0	0	0	0	0	0	0	0	0	0	0
84310	BC006224	MGC11257	C7orf50	585	0	0	*	2971	6388	278	0	0	0	0	0	0	0	0	0	0	0	0	0	0	0	0	0	0	2885	-1.14679	0	0	0	0	0	0	103	0	0	0	0	0	0	0	4707	-0.440556	0	0	0
402573	BC031966	LOC402573	C7orf61	621	0	0	*	7278	5596	0	0	0	128	-5.45018	0	0	0	603	-3.59331	0	13954	1.31821	0	0	0	4836	-0.589728	0	0	0	0	0	0	8128	0.159358	0	0	0	0	0	0	0	0	0	0	0	0	0	0
286122	BC073830	C8orf31	C8orf31	189	0	0	*	3430	1944	75	0	0	1667	-0.221774	0	0	0	5589	0.704382	0	10141	2.3831	1	1	0	1	0	0	2647	0.44533	0	0	0	7494	1.12753	0	6550	1.75247	1	1	0	1173	-1.54801	0	692	-1.49018	0	0	0
65265	BC010001	C8orf33	C8orf33	690	0	0	*	350	368	0	0	0	0	0	0	0	0	0	0	0	0	0	0	0	0	0	0	0	0	0	0	0	0	0	0	0	0	0	0	0	0	0	0	0	0	0	0	0	0
56260	BC014448	C8orf44	C8orf44	480	0	0	*	145	350	0	0	0	0	0	0	0	0	0	0	0	0	0	0	0	0	0	0	0	0	0	0	0	0	0	0	0	0	0	0	0	0	0	0	0	0	0	0	0	0
79095	BC001857	C9orf16	C9orf16	252	0	0	*	1488	387	0	0	0	0	0	0	0	0	712	-1.06343	0	0	0	0	0	0	0	0	0	3	0	0	0	0	302	0	0	0	0	0	0	0	0	0	0	0	0	0	0	0
84688	BC022084	C9orf24	C9orf24	789	0	0	*	20437	18897	34647	0.761547	0	9286	-1.02503	0	0	0	1370	-3.89894	0	15991	-0.240897	0	0	0	6465	-1.66046	0	21921	0.214156	0	0	0	6896	-1.56735	0	32216	0.76962	0	0	0	8262	-1.30662	0	4984	-1.92278	0	0	0
257169	BC033037	C9orf43	C9orf43	1386	0	0	*	1763	456	1260	-0.484609	0	0	0	0	0	0	0	0	0	7533	4.04612	1	1	0	585	-1.59152	0	0	0	0	0	0	0	0	0	8260	4.17904	1	1	0	4278	1.2789	0	0	0	0	0	0
157927	BC034752	C9orf62	C9orf62	459	0	0	*	1814	421	0	0	0	0	0	0	0	0	0	0	0	4476	3.41032	1	1	0	0	0	0	0	0	0	0	0	0	0	0	0	0	0	0	0	75	0	0	0	0	0	0	0
51759	BC007664	C9orf78	C9orf78	870	0	0	*	2002	974	0	0	0	0	0	0	0	0	0	0	0	0	0	0	0	0	1519	-0.39832	0	0	0	0	0	0	0	0	0	2906	1.57704	1	1	0	0	0	0	0	0	0	0	0
1349	BC018386	COX7B	COX7B	243	0	0	*	1020	1526	0	0	0	0	0	0	0	0	0	0	0	0	0	0	0	0	0	0	0	9694	2.66734	1	1	0	0	0	0	0	0	0	0	0	0	0	0	0	0	0	0	0
770	BC002662	CA11	CA11	987	0	0	*	4024	3227	0	0	0	57	-5.82309	0	0	0	0	0	0	0	0	0	0	0	0	0	0	1659	-0.95988	0	0	0	3623	-0.151445	0	3029	-0.091352	0	0	0	0	0	0	0	0	0	0	0
377677	BC052602	CA13	CA13	789	0	0	*	2896	967	1204	-1.26623	0	26623	4.78301	1	1	0	0	0	0	0	0	0	0	0	0	0	0	0	0	0	0	0	4599	0.667259	0	0	0	0	0	0	410	0	0	0	0	0	0	0
23632	BC034412	CA14	CA14	1014	0	0	*	4520	3729	0	0	0	0	0	0	0	0	0	0	0	0	0	0	0	0	18	0	0	49	0	0	0	0	7183	0.668264	0	0	0	0	0	0	10433	1.20676	0	0	0	0	0	0
760	BC011949	CA2	CA2	783	0	0	*	2963	687	0	0	0	0	0	0	0	0	0	0	0	0	0	0	0	0	0	0	0	0	0	0	0	0	6034	1.02606	0	416	0	0	0	0	0	0	0	0	0	0	0	0
92359	BC002652	CRB3	CRB3	372	0	0	*	2109	2746	1604	-0.394885	0	0	0	0	0	0	0	0	0	0	0	0	0	0	744	-1.50318	0	11555	2.07311	1	1	0	3	0	0	5097	0.892317	0	0	0	0	0	0	0	0	0	0	0
767	BC069794	CA8	CA8	873	0	0	*	1813	5836	323	0	0	0	0	0	0	0	986	-0.878719	0	5557	-0.0706736	0	0	0	0	0	0	770	-2.92205	0	0	0	6553	1.85378	1	15034	1.36518	0	1	0	0	0	0	0	0	0	0	0
164633	BC051805	CABP7	CABP7	648	0	0	*	80	1498	0	0	0	7	0	0	0	0	0	0	0	0	0	0	0	0	82	0	0	0	0	0	0	0	0	0	0	0	0	0	0	0	0	0	0	2063	0.461706	0	0	0
85438	BC046111	NYD-SP26	CABS1	1188	0	0	*	1515	524	7292	2.267	1	0	0	0	1	0	55	0	0	170	0	0	0	0	3551	1.22891	0	0	0	0	0	0	0	0	0	0	0	0	0	0	0	0	0	0	0	0	0	0
11094	BC030558	C9orf7	CACFD1	519	0	0	*	9023	4822	4895	-0.882298	0	1256	-1.9408	0	0	0	5370	-0.748685	0	5603	0.216568	0	0	0	629	-3.84248	0	1607	-1.58526	0	0	0	9131	0.0171657	0	70	0	0	0	0	0	0	0	7809	0.695506	0	0	0
93589	BC048288	CACNA2D4	CACNA2D4	615	0	0	*	8573	6186	1415	-2.599	0	0	0	0	0	0	2301	-1.89754	0	0	0	0	0	0	1582	-2.43805	0	0	0	0	0	0	0	0	0	5930	-0.0609747	0	0	0	0	0	0	10716	0.792688	0	0	0
10369	BC069612	CACNG2	CACNG2	972	0	0	*	10251	4681	19	0	0	0	0	0	0	0	0	0	0	1389	-1.75277	0	0	0	0	0	0	0	0	0	0	0	0	0	0	0	0	0	0	0	12854	0.326453	0	0	0	0	0	0
10368	BC040005	CACNG3	CACNG3	948	0	0	*	2413	2559	0	0	0	0	0	0	0	0	0	0	0	1297	-0.980402	0	0	0	0	0	0	6378	1.31752	0	0	0	0	0	0	4015	0.64982	0	0	0	0	0	0	8335	1.7036	1	1	0
10241	BC004130	NDP52	CALCOCO2	1341	0	0	*	1602	2387	24	0	0	0	0	0	0	0	0	0	0	0	0	0	0	0	0	0	0	0	0	0	0	0	0	0	0	0	0	0	0	0	0	0	0	0	0	0	0	0
119395	BC043367	FAM26A	CALHM3	1053	0	0	*	3164	3502	0	0	0	415	-3.077	0	0	0	0	0	0	0	0	0	0	0	0	0	0	0	0	0	0	0	0	0	0	816	-2.10154	0	0	0	0	0	0	5524	0.657534	0	0	0
254228	BC032556	C6orf188	CALHM5	930	0	0	*	1093	1670	0	0	0	0	0	0	0	0	0	0	0	0	0	0	0	0	0	0	0	0	0	0	0	0	5711	2.38545	1	0	0	0	1	0	0	0	0	0	0	0	0	0
801	BC008597	CALM1	CALM1	450	0	0	*	15556	6058	5891	-1.40089	0	5608	-0.111355	0	0	0	0	0	0	12549	1.05066	0	0	0	1318	-3.56105	0	6537	0.109787	0	0	0	6362	-1.28992	0	196	0	0	0	0	0	0	0	4015	-0.593442	0	0	0
808	BC006182	CALM3	CALM3	444	0	0	*	4875	4663	0	0	0	9066	0.959208	0	0	0	0	0	0	12966	1.4754	0	0	0	0	0	0	1858	-1.32751	0	0	0	9970	1.03219	0	23221	2.3161	1	1	0	15044	1.62571	1	5455	0.226321	0	1	0
57565	BC021267	KLHL14	KLHL14	1167	1	0	NA	50	350	7557	7.23974	1	0	0	0	1	7.23974	0	0	0	7347	4.39173	1	1	0	0	0	0	0	0	0	0	0	0	0	0	0	0	0	0	0	0	0	0	0	0	0	0	0
83698	BC020200	CALN1	CALN1	660	0	0	*	4785	1791	0	0	0	0	0	0	0	0	55	0	0	324	0	0	0	0	0	0	0	348	0	0	0	0	0	0	0	0	0	0	0	0	0	0	0	0	0	0	0	0
1393	BC018038	CRHBP	CRHBP	969	0	0	*	582	843	0	0	0	6118	2.85946	1	1	0	3233	2.47378	1	540	-0.642573	0	1	0	333	0	0	6292	2.89991	1	1	0	0	0	0	1313	0.639262	0	0	0	0	0	0	3517	2.06074	1	1	0
57172	BC032787	CAMK1G	CAMK1G	1431	0	0	*	3424	2041	0	0	0	1057	-0.949301	0	0	0	0	0	0	0	0	0	0	0	7310	1.09419	0	0	0	0	0	0	0	0	0	0	0	0	0	0	11074	1.69342	1	0	0	0	1	0
10865	BC067301	ARID5A	ARID5A	1293	1	1	ARID/BRIGHT	50	1214	9169	7.51869	1	0	0	0	1	7.51869	0	0	0	0	0	0	0	0	3972	6.31179	1	0	0	0	1	6.31179	0	0	0	0	0	0	0	0	25383	8.98772	1	0	0	0	1	8.98772
84254	BC031647	CAMKK1	CAMKK1	1563	0	0	*	544	771	0	0	0	0	0	0	0	0	0	0	0	7255	3.23417	1	1	0	0	0	0	0	0	0	0	0	0	0	0	0	0	0	0	0	0	0	0	0	0	0	0	0
1398	BC008506	CRK	CRK	915	1	1	NA	3148	2990	3320	0.0767477	0	12449	2.05781	1	1	0	0	0	0	2192	-0.447898	0	0	0	1179	-1.41687	0	10434	1.80307	1	1	0	5682	0.851963	0	0	0	0	0	0	926	-1.76535	0	581	-2.36354	0	0	0
820	BC055089	CAMP	CAMP	513	0	0	*	1174	2213	0	0	0	0	0	0	0	0	0	0	0	9354	2.07958	1	1	0	0	0	0	0	0	0	0	0	0	0	0	0	0	0	0	0	0	0	0	0	0	0	0	0
124583	BC017655	CANT1	CANT1	1206	0	0	*	1253	378	0	0	0	0	0	0	0	0	0	0	0	0	0	0	0	0	0	0	0	0	0	0	0	0	0	0	0	0	0	0	0	0	0	0	0	0	0	0	0	0
10486	BC008481	CAP2	CAP2	1434	0	0	*	268	178	0	0	0	0	0	0	0	0	0	0	0	0	0	0	0	0	0	0	0	0	0	0	0	0	0	0	0	0	0	0	0	0	0	0	0	388	0	0	0	0
822	BC000728	CAPG	CAPG	1047	0	0	*	50	150	961	4.26454	1	0	0	0	1	0	0	0	0	0	0	0	0	0	71	0	0	0	0	0	0	0	0	0	0	0	0	0	0	0	0	0	0	0	0	0	0	0
23399	BC009295	DULLARD	CTDNEP1	735	0	0	*	1620	4644	0	0	0	0	0	0	0	0	0	0	0	0	0	0	0	0	0	0	0	24751	2.41405	1	1	0	0	0	0	8009	0.786254	0	0	0	0	0	0	0	0	0	0	0
58190	BC012977	CTDSP1	CTDSP1	786	1	0	NA	2862	1520	7639	1.41636	0	3731	1.29549	0	0	0	0	0	0	6498	2.09592	1	1	0	0	0	0	4321	1.50729	1	1	0	0	0	0	0	0	0	0	0	0	0	0	3697	1.28228	0	0	0
133690	BC017586	CAPSL	CAPSL	597	0	0	*	1295	122	0	0	0	0	0	0	0	0	3342	1.36776	0	0	0	0	0	0	5	0	0	0	0	0	0	0	0	0	0	0	0	0	0	0	0	0	0	0	0	0	0	0
64170	BC008877	CARD9	CARD9	1479	0	0	*	50	1077	0	0	0	5717	2.40824	1	1	0	2356	5.55827	1	0	0	0	1	0	0	0	0	617	-0.803676	0	0	0	0	0	0	7366	2.77386	1	1	0	596	3.57531	1	0	0	0	1	0
5476	BC000597	PPGB	CTSA	1440	0	0	*	752	2478	0	0	0	0	0	0	0	0	0	0	0	0	0	0	0	0	158	0	0	10849	2.13031	1	1	0	0	0	0	0	0	0	0	0	0	0	0	0	0	0	0	0
9607	BC029882	CART	CARTPT	351	0	0	*	3381	6011	13152	1.95976	1	14744	1.29445	0	1	0	55	0	0	2284	-1.39604	0	0	0	3647	0.10926	0	12835	1.09441	0	0	0	10170	1.5888	1	6656	0.14705	0	1	0	0	0	0	10010	0.735765	0	0	0
113201	BC063480	CASC4	CASC4	1302	0	0	*	3880	1239	0	0	0	0	0	0	0	0	0	0	0	0	0	0	0	0	0	0	0	0	0	0	0	0	4945	0.349914	0	11	0	0	0	0	0	0	0	0	0	0	0	0
23581	BC069541	CASP14	CASP14	729	0	0	*	3714	2993	0	0	0	0	0	0	0	0	0	0	0	1250	-1.25966	0	0	0	0	0	0	8218	1.4572	0	0	0	0	0	0	4636	0.631288	0	0	0	0	0	0	0	0	0	0	0
835	BC002427	CASP2	CASP2	1359	0	0	*	50	1095	0	0	0	0	0	0	0	0	0	0	0	0	0	0	0	0	0	0	0	0	0	0	0	0	0	0	0	0	0	0	0	0	3	0	0	0	0	0	0	0
839	BC000305	CASP6	CASP6	882	0	0	*	583	156	0	0	0	0	0	0	0	0	0	0	0	0	0	0	0	0	0	0	0	0	0	0	0	0	0	0	0	0	0	0	0	0	0	0	0	0	0	0	0	0
842	BC006463	CASP9	CASP9	1251	0	0	*	1565	1791	0	0	0	5203	1.53858	1	1	0	0	0	0	0	0	0	0	0	0	0	0	0	0	0	0	0	0	0	0	0	0	0	0	0	3	0	0	0	0	0	0	0
845	BC022288	CASQ2	CASQ2	1200	0	0	*	50	1021	0	0	0	0	0	0	0	0	932	4.22033	1	0	0	0	1	0	0	0	0	0	0	0	0	0	0	0	0	0	0	0	0	0	0	0	0	0	0	0	0	0
375307	BC052750	MGC50811	CATIP	1164	0	0	*	1580	378	0	0	0	0	0	0	0	0	0	0	0	0	0	0	0	0	0	0	0	0	0	0	0	0	4168	1.39943	0	0	0	0	0	0	0	0	0	0	0	0	0	0
257062	BC043005	MGC39581	CATSPERD	2175	0	0	*	1067	3096	3	0	0	0	0	0	0	0	0	0	0	170	0	0	0	0	1479	0.471062	0	0	0	0	0	0	0	0	0	0	0	0	0	0	0	0	0	0	0	0	0	0
857	BC009685	CAV1	CAV1	537	0	0	*	1450	1617	0	0	0	15344	3.24628	1	1	0	0	0	0	0	0	0	0	0	0	0	0	55	0	0	0	0	0	0	0	20	0	0	0	0	0	0	0	498	0	0	0	0
858	BC005256	CAV2	CAV2	489	0	0	*	7565	6417	12642	0.740813	0	13904	1.11553	0	0	0	11123	0.556134	0	17952	1.48417	0	0	0	755	-3.32479	0	6354	-0.0142339	0	0	0	3133	-1.2718	0	7575	0.239347	0	0	0	5795	-0.384531	0	5676	-0.177024	0	0	0
859	BC069368	CAV3	CAV3	456	0	0	*	2596	5121	8	0	0	14258	1.47727	0	0	0	0	0	0	1775	-1.52861	0	0	0	6943	1.41927	0	12670	1.30692	0	0	0	0	0	0	3208	-0.674751	0	0	0	5792	1.15777	0	15119	1.56187	1	1	0
1522	BC042168	CTSZ	CTSZ	912	0	0	*	737	1255	0	0	0	0	0	0	0	0	0	0	0	0	0	0	0	0	0	0	0	9501	2.92039	1	1	0	0	0	0	0	0	0	0	0	882	0.259114	0	0	0	0	0	0
23624	BC028915	CBLC	CBLC	1425	0	0	*	2047	1823	3772	0.881819	0	0	0	0	0	0	0	0	0	0	0	0	0	0	0	0	0	1244	-0.551328	0	0	0	5688	1.47441	0	3473	0.929868	0	0	0	0	0	0	0	0	0	0	0
541578	BC009523	CXorf40B	CXorf40B	477	0	0	*	3257	3174	0	0	0	0	0	0	0	0	0	0	0	7610	1.26159	0	0	0	3024	-0.107086	0	11692	1.88115	1	1	0	7239	1.15225	0	0	0	0	0	0	0	0	0	0	0	0	0	0
140689	BC069516	CBLN4	CBLN4	606	0	0	*	2557	964	0	0	0	3380	1.80992	1	1	0	0	0	0	1436	0.574951	0	0	0	2027	-0.335106	0	0	0	0	0	0	0	0	0	3225	1.74219	1	1	0	3679	0.524862	0	0	0	0	0	0
112597	BC010491	MGC4677	CYTOR	159	0	0	*	397	643	0	0	0	0	0	0	0	0	0	0	0	0	0	0	0	0	0	0	0	14605	4.5055	1	1	0	0	0	0	2797	2.12099	1	1	0	0	0	0	3780	2.5555	1	1	0
84869	BC021973	CBR4	CBR4	714	0	0	*	406	646	24	0	0	0	0	0	0	0	0	0	0	6792	3.39423	1	1	0	5	0	0	0	0	0	0	0	0	0	0	0	0	0	0	0	0	0	0	4430	2.7777	1	1	0
84733	BC004252	CBX2	CBX2	636	1	1	AT hook	150	1261	0	0	0	0	0	0	0	0	0	0	0	0	0	0	0	0	0	0	0	0	0	0	0	0	0	0	0	877	-0.52392	0	0	0	0	0	0	0	0	0	0	0
116159	BC036761	CYYR1	CYYR1	465	0	0	*	2220	2603	0	0	0	0	0	0	0	0	4767	1.10252	0	0	0	0	0	0	164	0	0	12805	2.29846	1	1	0	4989	1.16819	0	6419	1.30217	0	0	0	0	0	0	3184	0.290665	0	0	0
23466	BC064900	CBX6	CBX6	1239	1	0	NA	8439	9038	13333	0.659857	0	9988	0.144192	0	0	0	4219	-1.00017	0	9848	0.123827	0	0	0	13109	0.635414	0	17163	0.925226	0	0	0	11478	0.443727	0	0	0	0	0	0	16289	0.948754	0	9955	0.139418	0	0	0
57332	BC009376	CBX8	CBX8	1170	1	0	NA	2553	730	0	0	0	0	0	0	0	0	0	0	0	0	0	0	0	0	0	0	0	0	0	0	0	0	0	0	0	0	0	0	0	0	0	0	0	2035	1.47906	0	0	0
25776	BC016139	PGEA1	CBY1	381	0	0	*	1204	365	0	0	0	5632	3.94768	1	1	0	0	0	0	139	0	0	0	0	1061	-0.182411	0	0	0	0	0	0	0	0	0	5038	3.78688	1	1	0	0	0	0	1537	2.07415	1	1	0
200014	BC016880	CC2D1B	CC2D1B	1599	1	0	Unknown	9059	8932	8	0	0	0	0	0	0	0	19288	1.09028	0	14401	0.689114	0	0	0	2780	-1.70427	0	17203	0.945605	0	0	0	1519	-2.57623	0	32515	1.86405	1	1	0	0	0	0	1343	-2.73352	0	0	0
147372	BC046645	CCBE1	CCBE1	648	0	0	*	4984	4947	0	0	0	0	0	0	0	0	0	0	0	0	0	0	0	0	8629	0.791889	0	1262	-1.97084	0	0	0	4708	-0.0821897	0	0	0	0	0	0	0	0	0	12087	1.28883	0	0	0
388389	BC041060	LOC388389	CCDC103	729	0	0	*	5162	3770	11750	1.18666	0	3909	0.0522351	0	0	0	0	0	0	3566	-0.0802578	0	0	0	0	0	0	0	0	0	0	0	0	0	0	0	0	0	0	0	3	0	0	5372	0.510895	0	0	0
29903	BC000412	HSU79303	CCDC106	843	0	0	*	1139	378	0	0	0	0	0	0	0	0	0	0	0	0	0	0	0	0	0	0	0	0	0	0	0	0	0	0	0	0	0	0	0	0	0	0	0	0	0	0	0	0
203260	BC018758	MGC31967	CCDC107	852	0	0	*	1101	971	0	0	0	0	0	0	0	0	986	-0.159155	0	5526	2.50869	1	1	0	834	-0.400695	0	0	0	0	0	0	997	-0.143149	0	0	0	0	0	0	6	0	0	0	0	0	0	0
84317	BC006429	MGC12981	CCDC115	399	0	0	*	147	206	0	0	0	848	2.04142	1	1	0	0	0	0	1374	2.73767	1	1	0	0	0	0	0	0	0	0	0	0	0	0	0	0	0	0	0	0	0	0	1135	2.46198	1	1	0
3337	BC019827	DNAJB1	DNAJB1	1023	0	0	*	50	1679	0	0	0	0	0	0	0	0	0	0	0	7332	2.1266	1	1	0	0	0	0	0	0	0	0	0	4115	6.36282	1	0	0	0	1	6.36282	0	0	0	0	0	0	0	0
151903	BC020830	CCDC12	CCDC12	501	0	0	*	2427	662	0	0	0	0	0	0	0	0	0	0	0	0	0	0	0	0	2789	0.200574	0	0	0	0	0	0	0	0	0	0	0	0	0	0	0	0	0	0	0	0	0	0
79635	BC066969	FLJ13646	CCDC121	837	0	0	*	2870	87	0	0	0	0	0	0	0	0	0	0	0	0	0	0	0	0	0	0	0	0	0	0	0	0	0	0	0	0	0	0	0	0	0	0	0	0	0	0	0	0
115098	BC013949	LOC115098	CCDC124	672	1	0	HMG/Sox	1250	50	0	0	0	0	0	0	0	0	0	0	0	957	4.25852	1	1	0	188	0	0	342	0	0	0	0	0	0	0	0	0	0	0	0	0	0	0	0	0	0	0	0
57471	BC026345	KIAA1189	ERMN	855	0	0	*	50	359	0	0	0	0	0	0	0	0	0	0	0	0	0	0	0	0	0	0	0	1354	1.91517	1	1	0	0	0	0	0	0	0	0	0	7303	7.19042	1	0	0	0	1	7.19042
79879	BC017693	FLJ22349	CCDC134	690	0	0	*	4279	6657	0	0	0	259	-4.68385	0	0	0	0	0	0	0	0	0	0	0	0	0	0	0	0	0	0	0	147	0	0	0	0	0	0	0	380	0	0	7476	0.167394	0	0	0
339230	BC009369	MGC16597	CCDC137	870	0	0	*	1031	1838	0	0	0	0	0	0	0	0	0	0	0	0	0	0	0	0	0	0	0	0	0	0	0	0	0	0	0	0	0	0	0	0	0	0	0	0	0	0	0	0
115948	BC014252	MGC20983	CCDC151	1215	0	0	*	138	2044	0	0	0	0	0	0	0	0	0	0	0	0	0	0	0	0	0	0	0	0	0	0	0	0	0	0	0	6	0	0	0	0	0	0	0	0	0	0	0	0
339965	BC035224	FLJ25770	CCDC158	678	0	0	*	1482	1969	0	0	0	0	0	0	0	0	0	0	0	0	0	0	0	0	0	0	0	0	0	0	0	0	0	0	0	9937	2.33535	1	1	0	0	0	0	0	0	0	0	0
139170	BC035674	WDR40B	DCAF12L1	1392	0	0	*	817	914	486	0	0	0	0	0	0	0	0	0	0	0	0	0	0	0	0	0	0	6244	2.7722	1	1	0	0	0	0	0	0	0	0	0	0	0	0	540	-0.759235	0	0	0
84960	BC007542	KIAA1984	CCDC183	291	0	0	*	5639	1657	0	0	0	0	0	0	0	0	0	0	0	0	0	0	0	0	0	0	0	0	0	0	0	0	0	0	0	0	0	0	0	0	0	0	0	6853	2.04816	1	1	0
164127	BC030026	C1orf65	CCDC185	1872	0	0	*	885	421	0	0	0	0	0	0	0	0	0	0	0	0	0	0	0	0	0	0	0	0	0	0	0	0	0	0	0	0	0	0	0	0	0	0	0	0	0	0	0	0
8816	BC022967	WDR22	DCAF5	981	0	0	*	689	1879	563	-0.291369	0	0	0	0	0	0	0	0	0	0	0	0	0	0	0	0	0	7472	1.99153	1	1	0	0	0	0	0	0	0	0	0	0	0	0	1800	-0.0619682	0	0	0
10876	BC069407	FAM12A	EDDM3A	444	0	0	*	173	1486	0	0	0	0	0	0	0	0	0	0	0	11422	2.94231	1	1	0	0	0	0	7020	2.24004	1	1	0	0	0	0	0	0	0	0	0	6	0	0	5621	1.91939	1	1	0
54541	BC015236	DDIT4	DDIT4	699	0	0	*	1776	403	0	0	0	0	0	0	0	0	3342	0.91208	0	448	0	0	0	0	2378	0.421117	0	4092	3.34395	1	1	0	0	0	0	0	0	0	0	0	0	0	0	1551	1.94435	1	1	0
55036	BC058288	FLJ20753	CCDC40	1437	0	0	*	826	562	0	0	0	0	0	0	0	0	0	0	0	0	0	0	0	0	688	-0.263733	0	0	0	0	0	0	0	0	0	0	0	0	0	0	0	0	0	0	0	0	0	0
146849	BC029224	FLJ32734	CCDC42	729	0	0	*	793	474	0	0	0	0	0	0	0	0	7123	3.16709	1	0	0	0	1	0	264	0	0	0	0	0	0	0	0	0	0	18211	5.26378	1	1	0	0	0	0	0	0	0	0	0
124808	BC047776	FLJ31795	CCDC43	684	0	0	*	548	477	0	0	0	0	0	0	0	0	0	0	0	0	0	0	0	0	0	0	0	0	0	0	0	0	0	0	0	0	0	0	0	0	0	0	0	0	0	0	0	0
57003	BC008905	GK001	CCDC47	1452	0	0	*	400	799	0	0	0	0	0	0	0	0	0	0	0	0	0	0	0	0	0	0	0	0	0	0	0	0	0	0	0	0	0	0	0	0	0	0	0	0	0	0	0	0
79714	BC004341	FLJ12436	CCDC51	909	0	0	*	3596	1560	3267	-0.138427	0	3969	1.34723	0	0	0	0	0	0	5418	1.79621	1	1	0	9089	1.33773	0	3640	1.22239	0	0	0	0	0	0	0	0	0	0	0	0	0	0	1288	-0.276413	0	0	0
1672	BC047677	DEFB1	DEFB1	207	0	0	*	1024	3012	0	0	0	0	0	0	0	0	0	0	0	0	0	0	0	0	0	0	0	9104	1.59578	1	1	0	23	0	0	7816	1.37571	0	0	0	8	0	0	0	0	0	0	0
80323	BC029508	SE57-1	CCDC68	1008	0	0	*	601	415	0	0	0	0	0	0	0	0	0	0	0	0	0	0	0	0	0	0	0	0	0	0	0	0	0	0	0	0	0	0	0	0	0	0	0	0	0	0	0	0
161198	BC031567	CLEC14A	CLEC14A	1341	0	0	*	58	415	0	0	0	0	0	0	0	0	6685	6.84873	1	0	0	0	1	6.84873	0	0	0	0	0	0	0	0	0	0	0	0	0	0	0	0	0	0	0	0	0	0	0	0
90557	BC063387	LOC90557	CCDC74A	939	0	0	*	583	218	0	0	0	0	0	0	0	0	0	0	0	0	0	0	0	0	0	0	0	0	0	0	0	0	0	0	0	0	0	0	0	0	0	0	0	0	0	0	0	0
11007	BC008796	DIPA	CCDC85B	609	1	0	NA	1877	977	3262	0.797328	0	0	0	0	0	0	0	0	0	2531	1.37328	0	0	0	1418	-0.404571	0	0	0	0	0	0	0	0	0	1352	0.468665	0	0	0	0	0	0	6936	2.82767	1	1	0
9993	BC040500	DGCR2	DGCR2	1653	0	0	*	304	1564	0	0	0	6849	2.13065	1	1	0	0	0	0	7548	2.27085	1	1	0	0	0	0	5941	1.92547	1	1	0	0	0	0	2467	0.657517	0	0	0	180	0	0	8266	2.40195	1	1	0
220388	BC044814	FLJ38159	CCDC89	1125	0	0	*	4735	5109	4225	-0.164413	0	0	0	0	0	0	0	0	0	0	0	0	0	0	0	0	0	0	0	0	0	0	1376	-1.78288	0	2303	-1.14953	0	0	0	0	0	0	2008	-1.34728	0	0	0
26093	BC002787	CCDC9	CCDC9	1596	0	0	*	1101	128	1268	0.20374	0	0	0	0	0	0	0	0	0	0	0	0	0	0	0	0	0	0	0	0	0	0	0	0	0	0	0	0	0	0	3133	1.50873	1	0	0	0	1	0
60492	BC020783	MDS025	CCDC90B	765	0	0	*	1484	1869	0	0	0	1163	-0.684415	0	0	0	0	0	0	0	0	0	0	0	2508	0.757046	0	0	0	0	0	0	0	0	0	0	0	0	0	0	3785	1.3508	0	3309	0.824129	0	0	0
55297	BC028682	FLJ11088	CCDC91	1236	0	0	*	542	318	0	0	0	610	0.939782	0	0	0	0	0	0	1667	2.39016	1	1	0	0	0	0	0	0	0	0	0	0	0	0	0	0	0	0	0	0	0	0	0	0	0	0	0
80212	BC017186	FLJ22471	CCDC92	996	0	0	*	80	250	0	0	0	0	0	0	0	0	0	0	0	0	0	0	0	0	0	0	0	0	0	0	0	0	0	0	0	0	0	0	0	0	0	0	0	0	0	0	0	0
887	BC000740	CCKBR	CCKBR	1344	0	0	*	1473	609	0	0	0	0	0	0	0	0	0	0	0	0	0	0	0	0	0	0	0	0	0	0	0	0	0	0	0	872	0.517886	0	0	0	2052	0.478273	0	0	0	0	0	0
6356	BC017850	CCL11	CCL11	294	0	0	*	6722	4884	3435	-0.96858	0	0	0	0	0	0	8931	0.409931	0	17381	1.83138	1	1	0	3365	-0.998284	0	7500	0.618827	0	0	0	3514	-0.935776	0	1637	-1.57701	0	0	0	6987	0.0557826	0	8847	0.857125	0	0	0
6358	BC045165	CCL14	CCL14	282	0	0	*	18641	15220	4813	-1.95347	0	31865	1.066	0	0	0	19562	0.0695746	0	14695	-0.050643	0	0	0	21076	0.177122	0	25426	0.740336	0	0	0	2790	-2.74014	0	10090	-0.593042	0	0	0	921	-4.33913	0	7822	-0.960359	0	0	0
6362	BC069700	CCL18	CCL18	270	0	0	*	4419	2213	11	0	0	0	0	0	0	0	0	0	0	0	0	0	0	0	0	0	0	0	0	0	0	0	0	0	0	7447	1.75066	1	1	0	0	0	0	8916	2.01039	1	1	0
54487	BC078147	DGCR8	DGCR8	2223	0	0	*	310	1457	0	0	0	0	0	0	0	0	0	0	0	0	0	0	0	0	0	0	0	4526	1.63524	1	1	0	0	0	0	7436	2.35153	1	1	0	0	0	0	7490	2.36196	1	1	0
160851	BC043292	DGKH	DGKH	3303	0	0	*	3444	2387	0	0	0	1011	-1.23942	0	0	0	10192	1.56528	1	0	0	0	1	0	0	0	0	11457	2.26296	1	1	0	2555	-0.430762	0	9981	2.06399	1	1	0	0	0	0	0	0	0	0	0
6364	BC020698	CCL20	CCL20	288	0	0	*	6091	7240	0	0	0	0	0	0	0	0	14740	1.27499	0	0	0	0	0	0	3721	-0.710989	0	5923	-0.289662	0	0	0	419	0	0	18096	1.32161	0	0	0	14248	1.22601	0	1814	-1.99682	0	0	0
6366	BC027918	CCL21	CCL21	405	0	0	*	2917	605	0	0	0	0	0	0	0	0	0	0	0	0	0	0	0	0	0	0	0	0	0	0	0	0	0	0	0	0	0	0	0	0	0	0	0	0	0	0	0	0
9249	BC002730	DHRS3	DHRS3	909	0	0	*	1153	1124	0	0	0	2380	1.08232	0	0	0	6082	2.39915	1	46	0	0	1	0	0	0	0	7588	2.75508	1	1	0	6632	2.52405	1	0	0	0	1	0	0	0	0	3918	1.80148	1	1	0
56477	BC069532	CCL28	CCL28	384	0	0	*	4257	3617	0	0	0	7328	1.01863	0	0	0	0	0	0	2778	-0.380747	0	0	0	571	-2.89827	0	0	0	0	0	0	0	0	0	0	0	0	0	0	0	0	0	0	0	0	0	0
414062	BC007783	CCL3L3	CCL3L3	282	0	0	*	50	1414	0	0	0	0	0	0	0	0	0	0	0	0	0	0	0	0	0	0	0	0	0	0	0	0	0	0	0	0	0	0	0	0	0	0	0	0	0	0	0	0
6352	BC008600	CCL5	CCL5	276	0	0	*	1944	4335	2178	0.163976	0	0	0	0	0	0	0	0	0	0	0	0	0	0	2311	0.249489	0	8175	0.915187	0	0	0	0	0	0	1327	-1.70786	0	0	0	0	0	0	3309	-0.389637	0	0	0
83605	BC063663	CCM2	CCM2	216	0	0	*	1908	662	0	0	0	6633	3.32476	1	1	0	0	0	0	0	0	0	0	0	0	0	0	0	0	0	0	0	0	0	0	0	0	0	0	0	0	0	0	28	0	0	0	0
140706	BC032455	C20orf160	CCM2L	462	0	0	*	1668	2038	0	0	0	0	0	0	0	0	0	0	0	0	0	0	0	0	0	0	0	0	0	0	0	0	0	0	0	0	0	0	0	0	0	0	0	0	0	0	0	0
3491	BC016952	CYR61	CCN1	1146	0	0	*	901	387	320	0	0	0	0	0	0	0	0	0	0	0	0	0	0	0	0	0	0	0	0	0	0	0	0	0	0	0	0	0	0	0	0	0	0	1038	1.4234	0	0	0
4856	BC015028	NOV	CCN3	1074	0	0	*	828	2303	0	0	0	0	0	0	0	0	0	0	0	0	0	0	0	0	0	0	0	0	0	0	0	0	0	0	0	0	0	0	0	0	0	0	0	0	0	0	0	0
8839	BC058074	WISP2	CCN5	657	0	0	*	3473	1863	0	0	0	0	0	0	0	0	0	0	0	0	0	0	0	0	0	0	0	0	0	0	0	0	0	0	0	0	0	0	0	0	0	0	0	0	0	0	0	0
55101	BC013323	FLJ10241	DMAC2	477	0	0	*	1467	234	678	-1.11351	0	0	0	0	0	0	110	0	0	0	0	0	0	0	616	-1.25187	0	1626	2.79675	1	1	0	977	-0.586438	0	858	1.87447	1	1	0	391	0	0	55	0	0	0	0
595	BC000076	CCND1	CCND1	888	0	0	*	375	1498	646	0.784644	0	4026	1.42631	0	0	0	2301	2.6173	1	0	0	0	1	0	0	0	0	0	0	0	0	0	0	0	0	268	0	0	0	0	0	0	0	7089	2.24254	1	1	0
11144	BC035658	DMC1	DMC1	498	1	0	Unknown	4219	94	3	0	0	0	0	0	0	0	0	0	0	278	0	0	0	0	0	0	0	1681	4.16052	1	1	0	0	0	0	3613	5.26439	1	1	0	0	0	0	1592	4.08204	1	1	0
901	BC032518	CCNG2	CCNG2	1035	0	0	*	7894	8841	0	0	0	567	-3.96279	0	0	0	10301	0.383956	0	0	0	0	0	0	3808	-1.05172	0	12982	0.554231	0	0	0	774	-3.35035	0	3577	-1.30546	0	0	0	0	0	0	11187	0.339542	0	0	0
2039	BC006318	EPB49	DMTN	1218	0	0	*	1862	50	0	0	0	0	0	0	0	0	0	0	0	0	0	0	0	0	0	0	0	3187	5.99413	1	1	0	0	0	0	0	0	0	0	0	0	0	0	0	0	0	0	0
79616	BC035871	FLJ14166	CCNJL	1098	0	0	*	3955	3870	358	0	0	14	0	0	0	0	0	0	0	31	0	0	0	0	6228	0.655091	0	3	0	0	0	0	0	0	0	10694	1.4664	0	0	0	0	0	0	0	0	0	0	0
92002	BC007232	FAM58A	CCNQ	645	0	0	*	3219	1654	0	0	0	0	0	0	0	0	0	0	0	0	0	0	0	0	0	0	0	0	0	0	0	0	0	0	0	0	0	0	0	0	0	0	0	0	0	0	0	0
1230	BC051306	CCR1	CCR1	1068	0	0	*	11043	14384	2653	-2.05744	0	16411	0.190198	0	0	0	0	0	0	19125	0.410995	0	0	0	4417	-1.32199	0	12906	-0.156423	0	0	0	12997	0.235046	0	7156	-1.00724	0	0	0	1300	-3.08655	0	0	0	0	0	0
401145	BC051694	MGC48628	CCSER1	2034	0	0	*	50	122	2426	5.60051	1	0	0	0	1	0	0	0	0	0	0	0	0	0	0	0	0	0	0	0	0	0	0	0	0	0	0	0	0	0	0	0	0	0	0	0	0	0
54788	BC064920	DNAJB12	DNAJB12	1128	0	0	*	11696	3277	35	0	0	14	0	0	0	0	0	0	0	0	0	0	0	0	0	0	0	10910	1.7352	1	1	0	0	0	0	3932	0.262888	0	0	0	0	0	0	0	0	0	0	0
929	BC010507	CD14	CD14	1128	0	0	*	3357	790	0	0	0	0	0	0	0	0	0	0	0	0	0	0	0	0	0	0	0	0	0	0	0	0	21	0	0	0	0	0	0	0	0	0	0	0	0	0	0	0
57126	BC029167	CD177	CD177	1314	0	0	*	425	368	0	0	0	0	0	0	0	0	0	0	0	0	0	0	0	0	0	0	0	0	0	0	0	0	375	0	0	0	0	0	0	0	0	0	0	0	0	0	0	0
4345	BC022522	CD200	CD200	810	0	0	*	4045	3149	0	0	0	0	0	0	0	0	110	0	0	0	0	0	0	0	0	0	0	0	0	0	0	0	5817	0.524136	0	0	0	0	0	0	0	0	0	5150	0.709679	0	0	0
131450	BC069661	CD200R1	CD200R1	1047	0	0	*	2050	821	0	0	0	4299	2.38855	1	1	0	0	0	0	0	0	0	0	0	0	0	0	0	0	0	0	0	0	0	0	0	0	0	0	0	0	0	0	0	0	0	0	0
55192	BC000048	DNAJC17	DNAJC17	915	0	0	*	2278	3030	0	0	0	0	0	0	0	0	0	0	0	1219	-1.31362	0	0	0	0	0	0	8976	1.56675	1	1	0	0	0	0	0	0	0	0	0	0	0	0	0	0	0	0	0
83475	BC009863	HLRC1	DOHH	909	0	0	*	3022	874	7848	1.37682	0	0	0	0	0	0	0	0	0	93	0	0	0	0	898	-1.75072	0	3221	1.8818	1	1	0	3021	-0.000477476	0	50	0	0	0	0	0	0	0	0	0	0	0	0
939	BC012160	TNFRSF7	CD27	783	0	0	*	1408	961	0	0	0	0	0	0	0	0	0	0	0	11546	3.58671	1	1	0	0	0	0	0	0	0	0	0	0	0	0	0	0	0	0	0	0	0	0	0	0	0	0	0
11314	BC032352	CD300A	CD300A	900	0	0	*	1001	284	0	0	0	0	0	0	0	0	0	0	0	0	0	0	0	0	0	0	0	0	0	0	0	0	0	0	0	7777	4.77525	1	1	0	0	0	0	0	0	0	0	0
146894	BC025395	CD300LG	CD300LG	999	0	0	*	3737	2157	0	0	0	0	0	0	0	0	0	0	0	2593	0.265596	0	0	0	0	0	0	0	0	0	0	0	238	0	0	5513	1.35381	0	0	0	39	0	0	0	0	0	0	0
9936	BC020646	CD302	CD302	513	0	0	*	589	1629	0	0	0	0	0	0	0	0	0	0	0	0	0	0	0	0	0	0	0	0	0	0	0	0	0	0	0	0	0	0	0	0	0	0	0	0	0	0	0	0
945	BC028152	CD33	CD33	1095	0	0	*	282	590	0	0	0	3972	2.75108	1	1	0	0	0	0	0	0	0	0	0	0	0	0	0	0	0	0	0	0	0	0	0	0	0	0	0	0	0	0	0	0	0	0	0
25911	BC031695	RP11-529I10.4	DPCD	612	0	0	*	9131	4123	809	-3.49656	0	0	0	0	0	0	15507	0.764075	0	8891	1.10865	0	0	0	0	0	0	19406	2.23474	1	1	0	0	0	0	6114	0.568422	0	0	0	0	0	0	263	0	0	0	0
916	BC049847	CD3E	CD3E	624	0	0	*	675	930	0	0	0	10016	3.42893	1	1	0	0	0	0	278	0	0	0	0	282	0	0	0	0	0	0	0	0	0	0	0	0	0	0	0	0	0	0	3060	1.71823	1	1	0
554236	BC066987	DPY19L2P1	DPY19L2P1	729	0	0	*	1249	56	0	0	0	0	0	0	0	0	0	0	0	0	0	0	0	0	0	0	0	3444	5.94251	1	1	0	1648	0.399943	0	0	0	0	0	0	0	0	0	0	0	0	0	0
4179	BC030594	MCP	CD46	1155	0	0	*	855	306	0	0	0	0	0	0	0	0	0	0	0	0	0	0	0	0	0	0	0	0	0	0	0	0	0	0	0	0	0	0	0	0	0	0	0	0	0	0	0	0
962	BC030224	CD48	CD48	510	0	0	*	2787	4422	0	0	0	4	0	0	0	0	9808	1.81525	1	3072	-0.525521	0	1	0	4080	0.549856	0	0	0	0	0	0	3508	0.331936	0	6628	0.583875	0	0	0	0	0	0	5441	0.299173	0	0	0
966	BC001506	CD59	CD59	387	0	0	*	5557	6916	0	0	0	0	0	0	0	0	0	0	0	5017	-0.463113	0	0	0	5402	-0.0408126	0	461	0	0	0	0	0	0	0	0	0	0	0	0	3080	-0.851376	0	0	0	0	0	0
922	BC033586	CD5L	CD5L	1044	0	0	*	820	50	0	0	0	3075	5.94251	1	1	0	0	0	0	0	0	0	0	0	0	0	0	0	0	0	0	0	0	0	0	0	0	0	0	0	0	0	0	0	0	0	0	0
969	BC007037	CD69	CD69	600	0	0	*	99	2094	131	0	0	7	0	0	0	0	0	0	0	31	0	0	0	0	0	0	0	0	0	0	0	0	0	0	0	0	0	0	0	0	0	0	0	0	0	0	0	0
924	BC013297	CD7	CD7	723	0	0	*	2454	2887	0	0	0	4217	0.546646	0	0	0	548	-2.16289	0	0	0	0	0	0	345	0	0	2744	-0.0732906	0	0	0	1167	-1.07233	0	221	0	0	0	0	25	0	0	14	0	0	0	0
972	BC018726	CD74	CD74	699	0	0	*	1203	1651	1594	0.406015	0	0	0	0	0	0	0	0	0	370	0	0	0	0	0	0	0	0	0	0	0	0	0	0	0	0	0	0	0	0	0	0	0	1094	-0.593727	0	0	0
974	BC032651	CD79B	CD79B	690	0	0	*	1009	2441	0	0	0	50	-5.6094	0	0	0	0	0	0	911	-1.42195	0	0	0	0	0	0	1070	-1.18986	0	0	0	6397	2.66447	1	0	0	0	1	0	1664	0.721729	0	0	0	0	0	0
975	BC002978	CD81	CD81	711	0	0	*	5194	4766	0	0	0	0	0	0	0	0	6356	0.291273	0	9863	1.04925	0	0	0	5792	0.157216	0	10715	1.16878	0	0	0	0	0	0	168	0	0	0	0	0	0	0	4458	-0.0963823	0	0	0
9308	BC030830	CD83	CD83	618	0	0	*	788	1276	0	0	0	6079	2.25221	1	1	0	0	0	0	0	0	0	0	0	27	0	0	0	0	0	0	0	0	0	0	2107	0.723562	0	0	0	0	0	0	222	0	0	0	0
8832	BC020063	CD84	CD84	987	0	0	*	898	2044	0	0	0	0	0	0	0	0	0	0	0	0	0	0	0	0	0	0	0	0	0	0	0	0	0	0	0	0	0	0	0	0	0	0	0	0	0	0	0	0
928	BC011988	CD9	CD9	687	0	0	*	5613	1479	0	0	0	0	0	0	0	0	0	0	0	0	0	0	0	0	1942	-1.53123	0	0	0	0	0	0	0	0	0	0	0	0	0	0	1295	-2.11582	0	734	-1.01077	0	0	0
83692	BC030536	CD99L2	CD99L2	789	0	0	*	2797	2325	3297	0.237274	0	1933	-0.266389	0	0	0	1589	-0.815761	0	15	0	0	0	0	919	-1.60574	0	0	0	0	0	0	0	0	0	4110	0.821908	0	0	0	0	0	0	2284	-0.0256681	0	0	0
81602	BC009562	CDADC1	CDADC1	300	0	0	*	379	5046	0	0	0	0	0	0	0	0	110	0	0	11268	1.15902	0	0	0	0	0	0	477	0	0	0	0	2440	2.68661	1	0	0	0	1	0	0	0	0	11505	1.18905	0	0	0
51233	BC056888	LOC51233	DRICH1	690	0	0	*	50	1052	0	0	0	0	0	0	0	0	0	0	0	15	0	0	0	0	0	0	0	11246	3.41821	1	1	0	0	0	0	0	0	0	0	0	6	0	0	0	0	0	0	0
10281	BC069729	DSCR4	DSCR4	357	0	0	*	3710	3689	0	0	0	21678	2.55493	1	1	0	164	0	0	0	0	0	0	0	8231	1.14965	0	20292	2.45961	1	1	0	8090	1.12472	0	727	-2.3432	0	0	0	0	0	0	9442	1.35586	0	0	0
166979	BC037547	FLJ37927	CDC20B	579	0	0	*	3684	3177	9786	1.40945	0	0	0	0	0	0	0	0	0	4276	0.428597	0	0	0	4891	0.408856	0	4987	0.650507	0	0	0	0	0	0	17817	2.48752	1	1	0	0	0	0	0	0	0	0	0
995	BC019089	CDC25C	CDC25C	1422	0	0	*	1394	3408	0	0	0	0	0	0	0	0	0	0	0	0	0	0	0	0	0	0	0	6	0	0	0	0	0	0	0	0	0	0	0	0	0	0	0	0	0	0	0	0
113878	BC018555	DTX2	DTX2	1869	1	0	NA	189	200	5	0	0	0	0	0	0	0	0	0	0	77	0	0	0	0	0	0	0	1036	2.37295	1	1	0	0	0	0	0	0	0	0	0	0	0	0	0	0	0	0	0
997	BC018143	CDC34	CDC34	711	0	0	*	2756	2128	0	0	0	0	0	0	0	0	0	0	0	2161	0.0222009	0	0	0	0	0	0	0	0	0	0	0	3297	0.258578	0	0	0	0	0	0	0	0	0	0	0	0	0	0
998	BC018266	CDC42	CDC42	576	0	0	*	4678	4828	16638	1.83052	1	4586	-0.0741893	0	1	0	3726	-0.328264	0	7409	0.617853	0	0	0	3539	-0.40255	0	5583	0.209615	0	0	0	6	0	0	10171	1.07496	0	0	0	0	0	0	12668	1.39169	0	0	0
10435	BC022337	CDC42EP2	CDC42EP2	633	0	0	*	242	2952	3152	3.70319	1	0	0	0	1	0	0	0	0	6159	1.061	0	0	0	0	0	0	950	-1.63569	0	0	0	0	0	0	2797	-0.0778125	0	0	0	1689	2.80309	1	0	0	0	1	0
10602	BC019270	CDC42EP3	CDC42EP3	765	0	0	*	2550	50	0	0	0	0	0	0	0	0	0	0	0	525	3.39232	1	1	0	0	0	0	0	0	0	0	0	4432	0.797461	0	0	0	0	0	0	0	0	0	0	0	0	0	0
56882	BC012796	CDC42SE1	CDC42SE1	240	0	0	*	12350	5805	7677	-0.685896	0	9945	0.776675	0	0	0	0	0	0	0	0	0	0	0	10	0	0	3417	-0.764566	0	0	0	4177	-1.56397	0	11773	1.02011	0	0	0	0	0	0	4943	-0.231909	0	0	0
84332	BC007374	MGC16186	DYDC2	534	0	0	*	2113	1248	0	0	0	0	0	0	0	0	0	0	0	0	0	0	0	0	19	0	0	13734	3.46006	1	1	0	0	0	0	0	0	0	0	0	0	0	0	17680	3.82443	1	1	0
55144	BC024159	LRRC8D	LRRC8D	2577	0	0	*	50	212	5106	6.67412	1	0	0	0	1	6.67412	0	0	0	0	0	0	0	0	0	0	0	0	0	0	0	0	0	0	0	0	0	0	0	0	0	0	0	0	0	0	0	0
55038	BC025263	CDCA4	CDCA4	726	0	0	*	9086	10677	0	0	0	13822	0.37246	0	0	0	6027	-0.592205	0	11731	0.13582	0	0	0	5605	-0.696931	0	15656	0.552209	0	0	0	12824	0.497129	0	19569	0.874064	0	0	0	39	0	0	2298	-2.21606	0	0	0
1909	BC022511	EDNRA	EDNRA	1284	0	0	*	2612	1233	0	0	0	0	0	0	0	0	0	0	0	7301	2.56592	1	1	0	0	0	0	13117	3.41119	1	1	0	0	0	0	7626	2.62875	1	1	0	8135	1.63899	1	1121	-0.137387	0	1	0
55536	BC025242	CDCA7L	CDCA7L	1362	0	0	*	494	902	0	0	0	0	0	0	0	0	0	0	0	633	-0.510922	0	0	0	0	0	0	0	0	0	0	0	0	0	0	0	0	0	0	0	0	0	0	0	0	0	0	0
8894	BC000934	EIF2S2	EIF2S2	1002	0	0	*	50	137	0	0	0	0	0	0	0	0	0	0	0	0	0	0	0	0	0	0	0	990	2.85325	1	1	0	1355	4.76022	1	0	0	0	1	0	0	0	0	0	0	0	0	0
28513	BC015877	CDH19	CDH19	1173	0	0	*	1617	356	0	0	0	0	0	0	0	0	0	0	0	0	0	0	0	0	0	0	0	0	0	0	0	0	0	0	0	0	0	0	0	0	0	0	0	0	0	0	0	0
10423	BC001444	CDIPT	CDIPT	642	0	0	*	1608	368	0	0	0	0	0	0	0	0	0	0	0	0	0	0	0	0	1	0	0	79	0	0	0	0	0	0	0	0	0	0	0	0	0	0	0	941	1.35449	0	0	0
8558	BC017342	CDK10	CDK10	852	0	0	*	3929	2266	8280	1.07547	0	0	0	0	0	0	0	0	0	123	0	0	0	0	1	0	0	24	0	0	0	0	0	0	0	0	0	0	0	0	6457	0.716702	0	28	0	0	0	0
8637	BC010881	EIF4EBP3	EIF4EBP3	303	0	0	*	594	490	0	0	0	2618	2.41761	1	1	0	0	0	0	3643	2.89427	1	1	0	596	0.0048494	0	2695	2.45943	1	1	0	0	0	0	145	0	0	0	0	0	0	0	0	0	0	0	0
5127	BC015607	PCTK1	CDK16	1491	0	0	*	1733	5078	0	0	0	27023	2.41186	1	1	0	0	0	0	6020	0.245503	0	0	0	0	0	0	5272	0.05409	0	0	0	0	0	0	9571	0.914409	0	0	0	0	0	0	11865	1.22438	0	0	0
1017	BC003065	CDK2	CDK2	897	1	1	NA	935	5555	0	0	0	33660	2.59918	1	1	0	5973	2.67542	1	10157	0.870616	0	1	0	164	0	0	0	0	0	0	0	1593	0.768708	0	5689	0.0343882	0	0	0	0	0	0	5870	0.0795736	0	0	0
1999	BC003569	ELF3	ELF3	1116	1	1	Ets; AT hook	390	602	0	0	0	0	0	0	0	0	0	0	0	0	0	0	0	0	0	0	0	6079	3.336	1	1	0	18	0	0	0	0	0	0	0	0	0	0	0	0	0	0	0
8099	BC034717	CDK2AP1	CDK2AP1	348	0	0	*	2248	4488	2472	0.137037	0	0	0	0	0	0	0	0	0	0	0	0	0	0	0	0	0	0	0	0	0	0	0	0	0	45	0	0	0	0	3444	0.615443	0	1869	-1.26381	0	0	0
8851	BC030792	CDK5R1	CDK5R1	924	0	0	*	9262	4787	6868	-0.431434	0	489	-3.29122	0	0	0	17699	0.934272	0	12441	1.37791	0	0	0	1001	-3.20988	0	3398	-0.494436	0	0	0	6174	-0.585118	0	567	-3.0777	0	0	0	7569	-0.291221	0	14136	1.56218	1	1	0
51654	BC050706	CDK5RAP1	CDK5RAP1	1764	0	0	*	188	1370	0	0	0	0	0	0	0	0	10520	5.80626	1	15	0	0	1	0	0	0	0	0	0	0	0	0	0	0	0	813	-0.752849	0	0	0	0	0	0	8432	2.6217	1	1	0
80279	BC009957	CDK5RAP3	CDK5RAP3	1521	1	0	Unknown	646	749	0	0	0	0	0	0	0	0	0	0	0	0	0	0	0	0	0	0	0	0	0	0	0	0	0	0	0	0	0	0	0	0	0	0	0	0	0	0	0	0
1021	BC052264	CDK6	CDK6	981	0	0	*	63	621	0	0	0	0	0	0	0	0	0	0	0	0	0	0	0	0	0	0	0	0	0	0	0	0	0	0	0	0	0	0	0	0	0	0	0	651	0.0680643	0	0	0
1025	BC001968	CDK9	CDK9	1119	1	1	Unknown	698	259	0	0	0	0	0	0	0	0	0	0	0	0	0	0	0	0	0	0	0	0	0	0	0	0	0	0	0	0	0	0	0	0	0	0	0	0	0	0	0	0
1027	BC001971	CDKN1B	CDKN1B	597	1	1	NA	1348	359	0	0	0	0	0	0	0	0	0	0	0	0	0	0	0	0	0	0	0	0	0	0	0	0	0	0	0	0	0	0	0	0	0	0	0	0	0	0	0	0
10300	BC001353	KATNB1	KATNB1	1968	0	0	*	1043	50	0	0	0	0	0	0	0	0	0	0	0	0	0	0	0	0	0	0	0	1620	5.01792	1	1	0	0	0	0	2004	5.32481	1	1	0	0	0	0	0	0	0	0	0
91368	BC018086	MGC13017	CDKN2AIPNL	258	0	0	*	3734	4965	3798	0.024518	0	9750	0.973609	0	0	0	1425	-1.38976	0	29482	2.56997	1	1	0	0	0	0	0	0	0	0	0	7802	1.06312	0	0	0	0	0	0	0	0	0	0	0	0	0	0
1039	BC017503	CDR2	CDR2	1332	1	1	NA	1340	2294	0	0	0	0	0	0	0	0	0	0	0	0	0	0	0	0	0	0	0	0	0	0	0	0	5435	2.02005	1	0	0	0	1	0	0	0	0	0	0	0	0	0
23587	BC002762	DERP6	ELP5	903	0	0	*	3364	1217	1762	-0.932964	0	14705	3.59491	1	1	0	4219	0.326723	0	16748	3.78259	1	1	0	3950	0.231675	0	13535	3.47529	1	1	0	208	0	0	9165	2.91281	1	1	0	3	0	0	0	0	0	0	0
63036	BC007031	ELA2A	CELA2A	810	0	0	*	9061	7321	8531	-0.0869554	0	7963	0.121271	0	0	0	0	0	0	19186	1.38994	0	0	0	5	0	0	9388	0.358777	0	0	0	5954	-0.605811	0	1707	-2.10058	0	0	0	13098	0.531604	0	29255	1.99857	1	1	0
51032	BC069455	ELA2B	CELA2B	810	0	0	*	952	1626	392	0	0	71	-4.51736	0	0	0	0	0	0	8335	2.35785	1	1	0	0	0	0	0	0	0	0	0	3	0	0	788	-1.04506	0	0	0	0	0	0	0	0	0	0	0
10136	BC008383	ELA3A	CELA3A	813	0	0	*	4933	8804	16	0	0	18071	1.03745	0	0	0	0	0	0	6359	-0.469359	0	0	0	1959	-1.33235	0	3832	-1.20006	0	0	0	1830	-1.43062	0	0	0	0	0	0	0	0	0	5455	-0.69058	0	0	0
55831	BC022807	LOC55831	EMC3	786	0	0	*	668	1963	0	0	0	0	0	0	0	0	0	0	0	1080	-0.862029	0	0	0	1	0	0	9138	2.21882	1	1	0	0	0	0	6	0	0	0	0	0	0	0	0	0	0	0	0
60677	BC033838	BRUNOL6	CELF6	1107	0	0	*	3007	2235	8125	1.43404	0	0	0	0	0	0	0	0	0	0	0	0	0	0	2787	-0.109612	0	0	0	0	0	0	5080	0.756504	0	419	0	0	0	0	1733	-0.795053	0	0	0	0	0	0
1058	BC002703	CENPA	CENPA	423	1	1	Unknown	50	190	0	0	0	0	0	0	0	0	0	0	0	0	0	0	0	0	10	0	0	24	0	0	0	0	370	0	0	0	0	0	0	0	0	0	0	941	2.3082	1	1	0
10436	BC055314	C2F	EMG1	735	0	0	*	349	571	179	0	0	0	0	0	0	0	0	0	0	0	0	0	0	0	214	0	0	1864	1.70684	1	1	0	287	0	0	0	0	0	0	0	0	0	0	678	0.247795	0	0	0
378708	BC029430	APITD1	CENPS	417	1	1	Unknown	3277	4962	0	0	0	333	-3.89733	0	0	0	1096	-1.58013	0	9848	0.988909	0	0	0	0	0	0	0	0	0	0	0	986	-1.73272	0	3543	-0.48595	0	0	0	0	0	0	0	0	0	0	0
201254	BC009571	STRA13	CENPX	192	1	1	Unknown	4596	7499	683	-2.75042	0	0	0	0	0	0	2685	-0.775457	0	0	0	0	0	0	2997	-0.61686	0	11680	0.63927	0	0	0	8823	0.94089	0	5860	-0.355798	0	0	0	0	0	0	5843	-0.359989	0	0	0
283638	BC047913	KIAA0284	CEP170B	465	0	0	*	723	2609	4548	2.65316	1	0	0	0	1	0	0	0	0	0	0	0	0	0	0	0	0	49	0	0	0	0	9031	3.64282	1	0	0	0	1	0	0	0	0	7822	1.58404	1	1	0
84984	BC007827	MGC14126	CEP19	492	0	0	*	5691	5159	0	0	0	2717	-0.925077	0	0	0	164	0	0	0	0	0	0	0	7692	0.434677	0	2518	-1.03481	0	0	0	4479	-0.345506	0	5689	0.141084	0	0	0	0	0	0	0	0	0	0	0
55722	BC001750	Cep72	CEP72	1377	0	0	*	1235	858	4199	1.76553	1	0	0	0	1	0	0	0	0	0	0	0	0	0	2206	0.836922	0	0	0	0	0	0	0	0	0	8059	3.23155	1	1	0	0	0	0	0	0	0	0	0
64793	BC019902	CCDC21	CEP85	585	0	0	*	5329	2921	10464	0.973498	0	0	0	0	0	0	2685	-0.988943	0	139	0	0	0	0	4	0	0	0	0	0	0	0	1132	-2.23499	0	0	0	0	0	0	17578	1.72183	1	0	0	0	1	0
27436	BC008685	EML4	EML4	189	0	0	*	1205	1511	3056	1.34261	0	1866	0.304445	0	0	0	0	0	0	0	0	0	0	0	3164	1.39272	0	16402	3.4403	1	1	0	0	0	0	5295	1.80913	1	1	0	0	0	0	0	0	0	0	0
9350	BC069405	CER1	CER1	804	0	0	*	5552	5511	147	0	0	0	0	0	0	0	0	0	0	0	0	0	0	0	0	0	0	0	0	0	0	0	0	0	0	0	0	0	0	0	2623	-1.08179	0	42	0	0	0	0
64781	BC004278	CERK	CERK	606	0	0	*	1387	696	0	0	0	0	0	0	0	0	0	0	0	0	0	0	0	0	0	0	0	306	0	0	0	0	0	0	0	0	0	0	0	0	0	0	0	0	0	0	0	0
56946	BC029375	C11orf30	EMSY	516	0	0	*	3139	1966	0	0	0	0	0	0	0	0	0	0	0	0	0	0	0	0	0	0	0	9153	2.21898	1	1	0	0	0	0	0	0	0	0	0	0	0	0	0	0	0	0	0
2053	BC007708	EPHX2	EPHX2	1668	0	0	*	55	805	0	0	0	0	0	0	0	0	0	0	0	4939	2.61716	1	1	0	0	0	0	3511	2.12482	1	1	0	0	0	0	1484	0.88243	0	0	0	0	0	0	17085	4.4076	1	1	0
1066	BC012418	CES1	CES1	1701	0	0	*	50	206	1476	4.88362	1	0	0	0	1	0	0	0	0	0	0	0	0	0	0	0	0	0	0	0	0	0	0	0	0	0	0	0	0	0	0	0	0	0	0	0	0	0
1070	BC005383	CETN3	CETN3	504	0	0	*	2252	1329	0	0	0	0	0	0	0	0	0	0	0	0	0	0	0	0	0	0	0	1565	0.235822	0	0	0	0	0	0	0	0	0	0	0	0	0	0	0	0	0	0	0
23085	BC005065	RAB6IP2	ERC1	276	1	0	Unknown	2684	243	0	0	0	4575	4.23474	1	1	0	0	0	0	15	0	0	0	0	2904	0.113657	0	1290	2.40834	1	1	0	0	0	0	0	0	0	0	0	0	0	0	0	0	0	0	0
85016	BC006128	MGC13040	CFAP300	690	0	0	*	4904	3040	32	0	0	13673	2.16919	1	1	0	0	0	0	5866	0.948306	0	0	0	2561	-0.937252	0	5871	0.949535	0	0	0	5611	0.194299	0	10130	1.73649	1	1	0	3	0	0	28	0	0	0	0
26074	BC028708	C20orf26	CFAP61	3714	0	0	*	2432	1872	0	0	0	0	0	0	0	0	0	0	0	0	0	0	0	0	0	0	0	0	0	0	0	0	0	0	0	0	0	0	0	0	0	0	0	0	0	0	0	0
254013	BC039535	MGC50559	ETFBKMT	789	0	0	*	775	643	0	0	0	0	0	0	0	0	0	0	0	0	0	0	0	0	44	0	0	11103	4.10999	1	1	0	0	0	0	0	0	0	0	0	0	0	0	11561	4.1683	1	1	0
25979	BC009679	DKFZp566O084	DHRS7B	978	0	0	*	50	378	0	0	0	4295	3.5062	1	1	0	3836	6.26153	1	0	0	0	1	6.26153	0	0	0	0	0	0	0	0	0	0	0	0	0	0	0	0	0	0	0	0	0	0	0	0
3426	BC020718	IF	CFI	1134	0	0	*	915	449	0	0	0	0	0	0	0	0	0	0	0	0	0	0	0	0	0	0	0	0	0	0	0	0	0	0	0	0	0	0	0	0	0	0	0	0	0	0	0	0
1072	BC018256	CFL1	CFL1	501	0	0	*	2026	5948	6751	1.73647	1	7640	0.361168	0	1	0	0	0	0	20962	1.8173	1	1	0	38	0	0	5269	-0.174875	0	0	0	0	0	0	101	0	0	0	0	0	0	0	0	0	0	0	0
54512	BC002777	EXOSC4	EXOSC4	738	0	0	*	3040	309	0	0	0	0	0	0	0	0	0	0	0	3365	3.44493	1	1	0	0	0	0	2280	2.88336	1	1	0	0	0	0	8190	4.72818	1	1	0	5922	0.962013	0	277	0	0	0	0
93659	BC006290	CGB5	CGB5	498	0	0	*	50	393	0	0	0	0	0	0	0	0	164	0	0	0	0	0	0	0	11	0	0	183	0	0	0	0	0	0	0	0	0	0	0	0	0	0	0	97	0	0	0	0
8545	BC052980	CGGBP1	CGGBP1	504	1	1	Unknown	1581	733	0	0	0	64	-3.51767	0	0	0	11671	2.88402	1	201	0	0	1	0	0	0	0	0	0	0	0	0	0	0	0	0	0	0	0	0	0	0	0	0	0	0	0	0
10669	BC034764	CGREF1	CGREF1	906	0	0	*	2087	115	0	0	0	0	0	0	0	0	0	0	0	0	0	0	0	0	0	0	0	0	0	0	0	0	0	0	0	0	0	0	0	0	0	0	0	0	0	0	0	0
10668	BC015063	CGRRF1	CGRRF1	999	1	0	NA	161	693	0	0	0	0	0	0	0	0	0	0	0	0	0	0	0	0	0	0	0	0	0	0	0	0	0	0	0	0	0	0	0	0	0	0	0	0	0	0	0	0
9023	BC072430	CH25H	CH25H	819	0	0	*	4177	5149	9719	1.21834	0	2469	-1.06037	0	0	0	0	0	0	6421	0.318506	0	0	0	2880	-0.536398	0	6014	0.224033	0	0	0	0	0	0	637	-3.01493	0	0	0	865	-2.2717	0	42	0	0	0	0
79094	BC019625	MGC4504	CHAC1	669	0	0	*	1522	1785	1898	0.318512	0	0	0	0	0	0	0	0	0	0	0	0	0	0	0	0	0	113	0	0	0	0	287	0	0	8	0	0	0	0	0	0	0	0	0	0	0	0
494143	BC017941	LOC494143	CHAC2	555	0	0	*	4205	1891	0	0	0	0	0	0	0	0	0	0	0	0	0	0	0	0	0	0	0	0	0	0	0	0	6497	0.627668	0	397	0	0	0	0	10824	1.36406	0	0	0	0	0	0
84269	BC004498	CHCHD5	CHCHD5	333	0	0	*	2535	3268	0	0	0	163	-4.32546	0	0	0	7397	1.54495	1	5341	0.708702	0	1	0	1	0	0	0	0	0	0	0	510	-2.31342	0	145	0	0	0	0	677	-1.90476	0	0	0	0	0	0
79145	BC002546	CHCHD7	CHCHD7	258	0	0	*	1653	830	0	0	0	0	0	0	0	0	0	0	0	93	0	0	0	0	0	0	0	0	0	0	0	0	0	0	0	6366	2.9392	1	1	0	0	0	0	0	0	0	0	0
1113	BC001059	CHGA	CHGA	1374	0	0	*	844	740	0	0	0	0	0	0	0	0	0	0	0	0	0	0	0	0	0	0	0	0	0	0	0	0	0	0	0	0	0	0	0	0	0	0	0	0	0	0	0	0
1116	BC038354	CHI3L1	CHI3L1	1152	0	0	*	1943	5343	3075	0.662301	0	1053	-2.34314	0	0	0	0	0	0	0	0	0	0	0	0	0	0	0	0	0	0	0	9577	2.30129	1	4633	-0.205703	0	1	0	0	0	0	0	0	0	0	0
11340	BC020773	EXOSC8	EXOSC8	831	0	0	*	2887	2659	0	0	0	0	0	0	0	0	0	0	0	0	0	0	0	0	4384	0.602677	0	9355	1.81485	1	1	0	11918	2.0455	1	3700	0.476641	0	1	0	0	0	0	0	0	0	0	0
66005	BC000001	MGC3234	CHID1	1182	0	0	*	3120	3789	0	0	0	1146	-1.72521	0	0	0	0	0	0	895	-2.08186	0	0	0	0	0	0	0	0	0	0	0	2329	-0.421835	0	0	0	0	0	0	0	0	0	0	0	0	0	0
57132	BC012733	CHMP1B	CHMP1B	600	0	0	*	423	2016	2117	2.32329	1	0	0	0	1	0	0	0	0	0	0	0	0	0	0	0	0	1800	-0.163499	0	0	0	0	0	0	0	0	0	0	0	0	0	0	0	0	0	0	0
51652	BC004419	VPS24	CHMP3	669	1	0	NA	4185	3723	0	0	0	0	0	0	0	0	0	0	0	4677	0.329118	0	0	0	0	0	0	0	0	0	0	0	0	0	0	0	0	0	0	0	0	0	0	0	0	0	0	0
128866	BC033859	CHMP4B	CHMP4B	675	0	0	*	2558	2918	1786	-0.518284	0	3111	0.0923985	0	0	0	0	0	0	2593	-0.170358	0	0	0	263	0	0	3120	0.0965661	0	0	0	0	0	0	0	0	0	0	0	3	0	0	4763	0.706891	0	0	0
51510	BC006974	CHMP5	CHMP5	660	0	0	*	7576	4244	16728	1.14276	0	16021	1.91647	1	1	0	1808	-2.06704	0	1760	-1.26985	0	0	0	5221	-0.53711	0	9416	1.14969	0	0	0	7257	-0.0620631	0	13055	1.62111	1	1	0	0	0	0	13928	1.71449	1	1	0
79643	BC010108	CHMP6	CHMP6	606	0	0	*	5694	3667	2066	-1.4626	0	0	0	0	0	0	0	0	0	3303	-0.150823	0	0	0	0	0	0	0	0	0	0	0	9504	0.739092	0	0	0	0	0	0	0	0	0	5040	0.458823	0	0	0
91782	BC019110	CHMP7	CHMP7	1362	0	0	*	406	418	51	0	0	0	0	0	0	0	0	0	0	0	0	0	0	0	0	0	0	0	0	0	0	0	0	0	0	0	0	0	0	0	0	0	0	0	0	0	0	0
1123	BC011393	CHN1	CHN1	1380	0	0	*	317	340	0	0	0	0	0	0	0	0	0	0	0	0	0	0	0	0	0	0	0	0	0	0	0	0	0	0	0	0	0	0	0	0	0	0	0	0	0	0	0	0
1128	BC022984	CHRM1	CHRM1	1383	0	0	*	811	69	0	0	0	0	0	0	0	0	0	0	0	0	0	0	0	0	0	0	0	0	0	0	0	0	0	0	0	0	0	0	0	0	0	0	0	0	0	0	0	0
1133	BC068528	CHRM5	CHRM5	1599	0	0	*	2293	3093	0	0	0	865	-1.83823	0	0	0	4712	1.0391	0	0	0	0	0	0	0	0	0	3	0	0	0	0	0	0	0	0	0	0	0	0	0	0	0	8709	1.4935	0	0	0
1134	BC006314	CHRNA1	CHRNA1	810	0	0	*	9331	5480	3219	-1.53542	0	5182	-0.0806669	0	0	0	877	-3.41138	0	8196	0.580744	0	0	0	5317	-0.811419	0	0	0	0	0	0	1376	-2.76155	0	2297	-1.25443	0	0	0	1697	-2.45905	0	928	-2.56198	0	0	0
1136	BC006114	CHRNA3	CHRNA3	1470	0	0	*	287	181	0	0	0	528	1.54455	1	1	0	658	1.19704	0	0	0	0	0	0	0	0	0	0	0	0	0	0	0	0	0	0	0	0	0	0	0	0	0	0	0	0	0	0
1138	BC033639	CHRNA5	CHRNA5	1407	0	0	*	79	200	0	0	0	0	0	0	0	0	0	0	0	0	0	0	0	0	0	0	0	0	0	0	0	0	0	0	0	0	0	0	0	0	0	0	0	0	0	0	0	0
1139	BC037571	CHRNA7	CHRNA7	966	0	0	*	4926	4319	1727	-1.51215	0	0	0	0	0	0	3452	-0.512984	0	46	0	0	0	0	0	0	0	128	0	0	0	0	0	0	0	6472	0.583514	0	0	0	15435	1.64772	1	0	0	0	1	0
8534	BC022567	CHST1	CHST1	1236	0	0	*	2065	2322	69	0	0	0	0	0	0	0	110	0	0	0	0	0	0	0	0	0	0	682	-1.76752	0	0	0	3344	0.695433	0	2881	0.311202	0	0	0	0	0	0	692	-1.74652	0	0	0
3004	BC025701	GZMM	GZMM	774	0	0	*	50	1935	0	0	0	0	0	0	0	0	0	0	0	0	0	0	0	0	0	0	0	11145	2.52599	1	1	0	3435	6.10224	1	0	0	0	1	6.10224	0	0	0	0	0	0	0	0
83641	BC004872	C10orf45	FAM107B	396	0	0	*	270	609	347	0	0	153	-1.99291	0	0	0	0	0	0	0	0	0	0	0	0	0	0	4370	2.84312	1	1	0	0	0	0	0	0	0	0	0	0	0	0	0	0	0	0	0
196951	BC048125	FLJ32800	FAM227B	915	0	0	*	2198	905	7752	1.81838	1	0	0	0	1	0	0	0	0	0	0	0	0	0	85	0	0	7121	2.97609	1	1	0	0	0	0	0	0	0	0	0	0	0	0	3738	2.04628	1	1	0
9679	BC031654	FAM53B	FAM53B	918	0	0	*	5466	637	9369	0.77741	0	0	0	0	0	0	0	0	0	0	0	0	0	0	4024	-0.441855	0	4217	2.72685	1	1	0	7427	0.442294	0	5614	3.13966	1	1	0	0	0	0	6826	3.42168	1	1	0
51647	BC001733	CGI-128	CIAO2B	492	0	0	*	3713	2906	2902	-0.355538	0	0	0	0	0	0	0	0	0	0	0	0	0	0	1296	-1.51852	0	385	0	0	0	0	469	0	0	5499	0.920135	0	0	0	0	0	0	4527	0.639521	0	0	0
57019	BC071740	CIAPIN1	CIAPIN1	939	0	0	*	3277	465	7482	1.19105	0	0	0	0	0	0	0	0	0	3504	2.9137	1	1	0	1152	-1.50823	0	79	0	0	0	0	0	0	0	117	0	0	0	0	0	0	0	0	0	0	0	0
10518	BC047381	CIB2	CIB2	564	0	0	*	1260	325	0	0	0	0	0	0	0	0	0	0	0	0	0	0	0	0	3	0	0	0	0	0	0	0	0	0	0	0	0	0	0	0	0	0	0	0	0	0	0	0
117286	BC069428	CIB3	CIB3	417	0	0	*	5509	4675	0	0	0	0	0	0	0	0	110	0	0	1436	-1.70291	0	0	0	493	0	0	0	0	0	0	0	0	0	0	7162	0.615396	0	0	0	0	0	0	1772	-1.39959	0	0	0
1149	BC031896	CIDEA	CIDEA	762	0	0	*	1523	868	3427	1.17003	0	0	0	0	0	0	0	0	0	0	0	0	0	0	0	0	0	0	0	0	0	0	0	0	0	0	0	0	0	0	0	0	0	0	0	0	0	0
27141	BC035970	CIDEB	CIDEB	660	0	0	*	2075	4675	894	-1.21476	0	0	0	0	0	0	0	0	0	4600	-0.0233325	0	0	0	2794	0.429221	0	8132	0.798644	0	0	0	9	0	0	59	0	0	0	0	0	0	0	0	0	0	0	0
63924	BC016851	CIDEC	CIDEC	717	0	0	*	1356	1039	0	0	0	6689	2.68659	1	1	0	0	0	0	0	0	0	0	0	0	0	0	0	0	0	0	0	0	0	0	0	0	0	0	0	0	0	0	0	0	0	0	0
51550	BC000600	CINP	CINP	639	0	0	*	1463	2818	0	0	0	0	0	0	0	0	0	0	0	0	0	0	0	0	0	0	0	0	0	0	0	0	0	0	0	0	0	0	0	0	0	0	0	0	0	0	0	0
51307	BC000259	FAM53C	FAM53C	1179	0	0	*	3387	3449	6150	0.860578	0	15479	2.16606	1	1	0	0	0	0	4986	0.531705	0	0	0	205	0	0	16683	2.27413	1	1	0	3218	-0.0738437	0	0	0	0	0	0	0	0	0	17085	2.30848	1	1	0
1154	BC031590	CISH	CISH	777	0	0	*	3601	2818	0	0	0	0	0	0	0	0	0	0	0	0	0	0	0	0	0	0	0	2643	-0.0924952	0	0	0	0	0	0	0	0	0	0	0	0	0	0	0	0	0	0	0
548596	BC001926	CKMT1A	CKMT1A	1254	0	0	*	704	2278	0	0	0	0	0	0	0	0	0	0	0	0	0	0	0	0	0	0	0	0	0	0	0	0	0	0	0	0	0	0	0	0	0	0	0	0	0	0	0	0
1160	BC029140	CKMT2	CKMT2	1260	0	0	*	1148	918	0	0	0	0	0	0	0	0	0	0	0	0	0	0	0	0	0	0	0	0	0	0	0	0	0	0	0	1148	0.322557	0	0	0	0	0	0	0	0	0	0	0
1163	BC007751	CKS1B	CKS1B	240	0	0	*	474	765	7434	3.97118	1	0	0	0	1	0	0	0	0	0	0	0	0	0	0	0	0	1339	0.807624	0	0	0	0	0	0	0	0	0	0	0	3	0	0	0	0	0	0	0
23332	BC032563	CLASP1	CLASP1	450	0	0	*	3271	5056	11414	1.803	1	312	-4.01838	0	1	0	10301	1.65498	1	0	0	0	1	0	242	0	0	9492	0.908716	0	0	0	4813	0.557205	0	9414	0.896811	0	0	0	0	0	0	0	0	0	0	0
23122	BC029035	CLASP2	CLASP2	1296	0	0	*	621	112	9164	3.88331	1	0	0	0	1	0	0	0	0	0	0	0	0	0	0	0	0	101	0	0	0	0	0	0	0	0	0	0	0	0	0	0	0	0	0	0	0	0
147965	BC034383	LOC147965	FAM98C	609	0	0	*	1602	175	0	0	0	0	0	0	0	0	0	0	0	0	0	0	0	0	0	0	0	4223	4.59284	1	1	0	0	0	0	61	0	0	0	0	3	0	0	0	0	0	0	0
10667	BC021112	FARS2	FARS2	1356	0	0	*	1125	1882	2755	1.29213	0	0	0	0	0	0	0	0	0	0	0	0	0	0	0	0	0	8319	2.14414	1	1	0	241	0	0	0	0	0	0	0	0	0	0	0	0	0	0	0
23155	BC002939	CLCC1	CLCC1	1506	0	0	*	1513	1117	0	0	0	0	0	0	0	0	0	0	0	0	0	0	0	0	0	0	0	0	0	0	0	0	0	0	0	0	0	0	0	0	0	0	0	0	0	0	0	0
1181	BC021578	CLCN2	CLCN2	1164	0	0	*	1293	1261	0	0	0	0	0	0	0	0	0	0	0	1960	0.636285	0	0	0	0	0	0	0	0	0	0	0	0	0	0	0	0	0	0	0	0	0	0	0	0	0	0	0
54850	BC001586	FBXL12	FBXL12	981	0	0	*	157	1476	0	0	0	28	0	0	0	0	0	0	0	0	0	0	0	0	1	0	0	16931	3.5199	1	1	0	35	0	0	0	0	0	0	0	0	0	0	0	0	0	0	0
2222	BC009251	FDFT1	FDFT1	1254	0	0	*	2616	2677	262	0	0	4221	0.656968	0	0	0	3342	0.353349	0	4770	0.833372	0	0	0	3613	0.465835	0	17292	2.69142	1	1	0	56	0	0	0	0	0	0	0	0	0	0	9899	1.88667	1	1	0
112812	BC063460	MGC19604	FDX2	552	0	0	*	1819	134	0	0	0	0	0	0	0	0	0	0	0	0	0	0	0	0	0	0	0	5871	5.4533	1	1	0	0	0	0	0	0	0	0	0	0	0	0	0	0	0	0	0
5010	BC013577	CLDN11	CLDN11	624	0	0	*	13950	12945	149	0	0	3277	-1.98195	0	0	0	274	0	0	895	-3.85436	0	0	0	6930	-1.00934	0	21191	0.711057	0	0	0	5385	-1.37325	0	6257	-1.04885	0	0	0	64	0	0	360	0	0	0	0
9069	BC036754	CLDN12	CLDN12	735	0	0	*	1624	765	0	0	0	0	0	0	0	0	0	0	0	1497	0.968543	0	0	0	1183	-0.457102	0	1986	1.37633	0	0	0	0	0	0	0	0	0	0	0	0	0	0	429	0	0	0	0
55277	BC014947	FLJ10986	FGGY	1320	0	0	*	4053	1682	0	0	0	0	0	0	0	0	822	-2.30178	0	0	0	0	0	0	0	0	0	13847	3.04132	1	1	0	3265	-0.311907	0	5256	1.64379	1	1	0	0	0	0	0	0	0	0	0
24146	BC010160	CLDN15	CLDN15	387	0	0	*	1339	743	0	0	0	0	0	0	0	0	0	0	0	0	0	0	0	0	0	0	0	0	0	0	0	0	0	0	0	0	0	0	0	0	0	0	0	7186	3.27375	1	1	0
10686	BC069759	CLDN16	CLDN16	918	0	0	*	1558	378	0	0	0	0	0	0	0	0	0	0	0	0	0	0	0	0	0	0	0	0	0	0	0	0	0	0	0	0	0	0	0	0	0	0	0	0	0	0	0	0
2267	BC007047	FGL1	FGL1	939	0	0	*	3318	768	0	0	0	10258	3.7395	1	1	0	712	-2.22036	0	0	0	0	0	0	2637	-0.331416	0	5574	2.85953	1	1	0	0	0	0	2822	1.87754	1	1	0	0	0	0	0	0	0	0	0
49861	BC020838	CLDN20	CLDN20	660	0	0	*	11479	9990	67	0	0	0	0	0	0	0	4767	-1.26784	0	942	-3.40669	0	0	0	3660	-1.64908	0	12233	0.292222	0	0	0	0	0	0	1881	-2.40898	0	0	0	726	-3.98288	0	1648	-2.59977	0	0	0
1365	BC016056	CLDN3	CLDN3	663	0	0	*	1007	1695	32	0	0	0	0	0	0	0	0	0	0	0	0	0	0	0	0	0	0	4535	1.41982	0	0	0	2681	1.41271	0	0	0	0	0	0	0	0	0	6936	2.03282	1	1	0
1364	BC000671	CLDN4	CLDN4	630	0	0	*	3301	2868	152	0	0	2490	-0.203899	0	0	0	1973	-0.742512	0	1374	-1.06166	0	0	0	2090	-0.6594	0	5043	0.814237	0	0	0	0	0	0	2059	-0.478101	0	0	0	2678	-0.301747	0	0	0	0	0	0
1366	BC071844	CLDN7	CLDN7	636	0	0	*	864	1323	0	0	0	64	-4.3696	0	0	0	0	0	0	3303	1.31996	0	0	0	603	-0.518873	0	15	0	0	0	0	0	0	0	0	0	0	0	0	0	0	0	1481	0.162759	0	0	0
2272	BC032336	FHIT	FHIT	444	0	0	*	8926	3804	0	0	0	1014	-1.90746	0	0	0	0	0	0	12271	1.68966	1	1	0	0	0	0	23868	2.64949	1	1	0	8225	-0.117998	0	3621	-0.0711291	0	0	0	0	0	0	4084	0.102466	0	0	0
10462	BC027858	CLEC10A	CLEC10A	771	0	0	*	683	91	0	0	0	0	0	0	0	0	0	0	0	0	0	0	0	0	0	0	0	0	0	0	0	0	0	0	0	6276	6.10783	1	1	0	0	0	0	0	0	0	0	0
84976	BC007734	DISP1	DISP1	1629	0	0	*	50	275	0	0	0	0	0	0	0	0	13973	8.1265	1	0	0	0	1	8.1265	0	0	0	0	0	0	0	0	0	0	0	0	0	0	0	0	0	0	0	0	0	0	0	0
114984	BC014089	LOC114984	FLYWCH2	423	0	0	*	505	646	0	0	0	0	0	0	0	0	0	0	0	0	0	0	0	0	872	0.788045	0	3909	2.59719	1	1	0	0	0	0	0	0	0	0	0	0	0	0	3184	2.30123	1	1	0
51267	BC039072	CLEC1A	CLEC1A	843	0	0	*	2787	3171	1054	-1.40284	0	5604	0.821519	0	0	0	0	0	0	0	0	0	0	0	16	0	0	0	0	0	0	0	0	0	0	0	0	0	0	0	0	0	0	0	0	0	0	0
51266	BC029554	CLEC1B	CLEC1B	591	0	0	*	1235	946	0	0	0	0	0	0	0	0	0	0	0	0	0	0	0	0	0	0	0	0	0	0	0	0	0	0	0	0	0	0	0	0	0	0	0	0	0	0	0	0
7123	BC011024	CLEC3B	CLEC3B	609	0	0	*	1501	4613	1994	0.409741	0	0	0	0	0	0	0	0	0	46	0	0	0	0	10	0	0	0	0	0	0	0	0	0	0	2635	-0.807902	0	0	0	4894	1.70509	1	0	0	0	1	0
338339	BC032313	CLEC4D	CLEC4D	648	0	0	*	1291	97	0	0	0	3522	5.18227	1	1	0	0	0	0	0	0	0	0	0	0	0	0	364	0	0	0	0	0	0	0	0	0	0	0	0	0	0	0	0	0	0	0	0
26253	BC000715	CLEC4E	CLEC4E	660	0	0	*	3173	577	0	0	0	0	0	0	0	0	0	0	0	0	0	0	0	0	189	0	0	516	-0.1612	0	0	0	0	0	0	0	0	0	0	0	0	0	0	138	0	0	0	0
1193	BC022305	CLIC2	CLIC2	744	0	0	*	1127	565	0	0	0	0	0	0	0	0	0	0	0	31	0	0	0	0	0	0	0	0	0	0	0	0	0	0	0	6259	3.46961	1	1	0	0	0	0	0	0	0	0	0
25932	BC012444	CLIC4	CLIC4	762	0	0	*	730	293	0	0	0	0	0	0	0	0	0	0	0	0	0	0	0	0	0	0	0	0	0	0	0	0	0	0	0	0	0	0	0	0	0	0	0	0	0	0	0	0
53405	BC035968	CLIC5	CLIC5	756	0	0	*	3116	4297	1212	-1.36231	0	12396	1.52847	1	1	0	0	0	0	4198	-0.0336276	0	0	0	33	0	0	21	0	0	0	0	9	0	0	14458	1.75047	1	1	0	15704	2.33336	1	8321	0.953427	0	1	0
1196	BC053603	CLK2	CLK2	1500	0	0	*	370	359	4330	3.54877	1	0	0	0	1	0	0	0	0	1729	2.26788	1	1	0	3	0	0	0	0	0	0	0	0	0	0	0	0	0	0	0	0	0	0	0	0	0	0	0
2326	BC047129	FMO1	FMO1	1599	0	0	*	1400	365	0	0	0	0	0	0	0	0	1973	0.494964	0	0	0	0	0	0	0	0	0	1036	1.50506	1	1	0	3	0	0	2607	2.83642	1	1	0	0	0	0	0	0	0	0	0
54982	BC013130	CLN6	CLN6	936	0	0	*	4935	3636	323	0	0	7225	0.990645	0	0	0	0	0	0	31	0	0	0	0	0	0	0	3481	-0.0628504	0	0	0	5553	0.170217	0	14	0	0	0	0	607	-3.02328	0	4887	0.426597	0	0	0
2055	BC007725	CLN8	CLN8	861	0	0	*	1427	1027	0	0	0	0	0	0	0	0	0	0	0	0	0	0	0	0	0	0	0	0	0	0	0	0	0	0	0	0	0	0	0	0	16419	3.52431	1	28	0	0	1	0
2327	BC005894	FMO2	FMO2	1416	0	0	*	1300	100	0	0	0	0	0	0	0	0	0	0	0	0	0	0	0	0	1959	0.591606	0	2399	4.58436	1	1	0	0	0	0	0	0	0	0	0	0	0	0	0	0	0	0	0
119467	BC029478	TMEM12	CLRN3	681	0	0	*	5427	1345	75	0	0	1295	-0.0546541	0	0	0	0	0	0	602	-1.15977	0	0	0	347	0	0	1989	0.564437	0	0	0	452	0	0	0	0	0	0	0	851	-2.67292	0	997	-0.431941	0	0	0
93986	BC018016	FOXP2	FOXP2	204	1	1	Forkhead	1152	1638	0	0	0	0	0	0	0	0	0	0	0	0	0	0	0	0	67	0	0	11613	2.82573	1	1	0	0	0	0	0	0	0	0	0	0	0	0	0	0	0	0	0
79703	BC028240	FLJ22531	C11orf80	1569	0	0	*	50	515	0	0	0	0	0	0	0	0	0	0	0	0	0	0	0	0	0	0	0	0	0	0	0	0	0	0	0	0	0	0	0	0	0	0	0	3461	2.74854	1	1	0
157807	BC042617	MGC34646	CLVS1	1065	0	0	*	6488	6120	0	0	0	0	0	0	0	0	6849	0.0781195	0	0	0	0	0	0	0	0	0	406	0	0	0	0	11642	0.843493	0	1646	-1.89457	0	0	0	1323	-2.29396	0	0	0	0	0	0
55907	BC016609	CMAS	CMAS	792	0	0	*	1027	240	0	0	0	0	0	0	0	0	5863	2.5132	1	0	0	0	1	0	3	0	0	0	0	0	0	0	0	0	0	0	0	0	0	0	0	0	0	5801	4.5952	1	1	0
146225	BC025354	CKLFSF2	CMTM2	747	0	0	*	101	328	0	0	0	0	0	0	0	0	0	0	0	0	0	0	0	0	0	0	0	0	0	0	0	0	0	0	0	0	0	0	0	0	0	0	0	0	0	0	0	0
112616	BC010116	CKLFSF7	CMTM7	528	0	0	*	2821	378	0	0	0	2916	2.94753	1	1	0	0	0	0	2115	2.4842	1	1	0	403	0	0	0	0	0	0	0	2514	-0.166222	0	0	0	0	0	0	0	0	0	6286	4.05568	1	1	0
152189	BC041390	CKLFSF8	CMTM8	522	0	0	*	1636	1645	0	0	0	0	0	0	0	0	0	0	0	5125	1.63946	1	1	0	0	0	0	1788	0.120259	0	0	0	0	0	0	25	0	0	0	0	0	0	0	0	0	0	0	0
80020	BC015726	FLJ23322	FOXRED2	2055	0	0	*	297	115	0	0	0	0	0	0	0	0	0	0	0	2531	4.46	1	1	0	0	0	0	562	2.28894	1	1	0	0	0	0	0	0	0	0	0	0	0	0	512	2.15451	1	1	0
254263	BC047953	CNIH2	CNIH2	483	0	0	*	2435	3807	0	0	0	0	0	0	0	0	0	0	0	0	0	0	0	0	0	0	0	0	0	0	0	0	0	0	0	22	0	0	0	0	0	0	0	0	0	0	0	0
154043	BC060761	CNKSR3	CNKSR3	1668	0	0	*	1228	2297	0	0	0	0	0	0	0	0	0	0	0	0	0	0	0	0	0	0	0	0	0	0	0	0	0	0	0	0	0	0	0	0	0	0	0	0	0	0	0	0
2307	BC013408	FKHL18	FOXS1	993	1	1	Forkhead	1620	774	0	0	0	6693	3.11225	1	1	0	0	0	0	3627	2.22837	1	1	0	0	0	0	5186	2.74422	1	1	0	0	0	0	0	0	0	0	0	0	0	0	0	0	0	0	0
9125	BC007102	RQCD1	CNOT9	777	0	0	*	706	406	0	0	0	0	0	0	0	0	0	0	0	0	0	0	0	0	0	0	0	0	0	0	0	0	0	0	0	0	0	0	0	0	0	0	0	0	0	0	0	0
1267	BC006392	CNP	CNP	1266	0	0	*	1771	1055	0	0	0	0	0	0	0	0	219	0	0	232	0	0	0	0	1502	-0.237679	0	79	0	0	0	0	16001	3.17553	1	0	0	0	1	0	0	0	0	0	0	0	0	0
10695	BC004423	TNRC5	CNPY3	837	1	0	NA	50	471	0	0	0	0	0	0	0	0	712	3.83188	1	0	0	0	1	0	0	0	0	963	1.03181	0	0	0	0	0	0	0	0	0	0	0	0	0	0	0	0	0	0	0
163882	BC010228	C1orf71	CNST	1851	0	0	*	1901	2231	0	0	0	0	0	0	0	0	493	0	0	7733	1.79334	1	1	0	0	0	0	0	0	0	0	0	3018	0.666834	0	0	0	0	0	0	9815	2.36823	1	0	0	0	1	0
2495	BC066341	FTH1	FTH1	552	0	0	*	5648	5852	400	0	0	0	0	0	0	0	0	0	0	16624	1.50627	1	1	0	2554	-1.14498	0	19602	1.744	1	1	0	11542	1.03108	0	7886	0.430364	0	0	0	8443	0.580016	0	1551	-1.91573	0	0	0
1271	BC001492	CNTFR	CNTFR	1119	0	0	*	901	724	0	0	0	0	0	0	0	0	0	0	0	0	0	0	0	0	0	0	0	0	0	0	0	0	0	0	0	0	0	0	0	0	0	0	0	0	0	0	0	0
493753	BC047722	MGC52110	COA5	225	0	0	*	50	780	0	0	0	521	-0.582191	0	0	0	1589	4.99005	1	0	0	0	1	0	0	0	0	0	0	0	0	0	0	0	0	196	0	0	0	0	2426	5.60051	1	0	0	0	1	0
388965	BC067852	LOC388965	FUNDC2P2	456	0	0	*	2910	3074	4706	0.693482	0	0	0	0	0	0	274	0	0	8243	1.42305	0	0	0	3897	0.421345	0	12897	2.06885	1	1	0	1778	-0.710764	0	5005	0.703253	0	0	0	0	0	0	2769	-0.150752	0	0	0
80347	BC067254	COASY	COASY	1695	0	0	*	612	2100	227	0	0	0	0	0	0	0	0	0	0	0	0	0	0	0	0	0	0	0	0	0	0	0	6	0	0	900	-1.22239	0	0	0	0	0	0	0	0	0	0	0
2528	BC061700	FUT6	FUT6	1080	0	0	*	636	381	0	0	0	0	0	0	0	0	0	0	0	0	0	0	0	0	0	0	0	6702	4.13673	1	1	0	0	0	0	0	0	0	0	0	0	0	0	0	0	0	0	0
84342	BC017492	COG8	COG8	660	0	0	*	826	1404	0	0	0	0	0	0	0	0	0	0	0	0	0	0	0	0	0	0	0	0	0	0	0	0	0	0	0	3	0	0	0	0	0	0	0	0	0	0	0	0
1278	BC054498	COL1A2	COL1A2	4101	0	0	*	2562	1354	4498	0.812013	0	0	0	0	0	0	0	0	0	0	0	0	0	0	0	0	0	0	0	0	0	0	0	0	0	0	0	0	0	0	0	0	0	0	0	0	0	0
2556	BC028629	GABRA3	GABRA3	1479	0	0	*	762	1005	0	0	0	0	0	0	0	0	0	0	0	0	0	0	0	0	0	0	0	3346	1.73524	1	1	0	0	0	0	0	0	0	0	0	3	0	0	0	0	0	0	0
1297	BC015409	COL9A1	COL9A1	987	0	0	*	2365	612	0	0	0	0	0	0	0	0	0	0	0	0	0	0	0	0	0	0	0	0	0	0	0	0	0	0	0	2713	2.14829	1	1	0	0	0	0	0	0	0	0	0
8813	BC007073	DPM1	DPM1	783	0	0	*	50	537	0	0	0	0	0	0	0	0	9151	7.51586	1	0	0	0	1	7.51586	0	0	0	28	0	0	0	0	0	0	0	0	0	0	0	0	0	0	0	0	0	0	0	0
81035	BC060789	COLEC12	COLEC12	2229	0	0	*	884	2762	8430	3.25341	1	0	0	0	1	0	0	0	0	0	0	0	0	0	0	0	0	0	0	0	0	0	0	0	0	0	0	0	0	0	0	0	0	0	0	0	0	0
51397	BC005179	COMMD10	COMMD10	609	0	0	*	595	1267	0	0	0	0	0	0	0	0	0	0	0	0	0	0	0	0	0	0	0	0	0	0	0	0	0	0	0	0	0	0	0	0	0	0	0	0	0	0	0	0
51122	BC046131	COMMD2	COMMD2	600	0	0	*	18018	16235	11780	-0.613099	0	887	-4.19403	0	0	0	2795	-2.68852	0	3411	-2.25084	0	0	0	5689	-1.66319	0	16188	-0.00418263	0	0	0	141	0	0	10222	-0.66743	0	0	0	0	0	0	12087	-0.425651	0	0	0
54951	BC008371	COMMD8	COMMD8	552	0	0	*	3003	1361	0	0	0	0	0	0	0	0	0	0	0	0	0	0	0	0	0	0	0	3	0	0	0	0	0	0	0	0	0	0	0	0	0	0	0	0	0	0	0	0
1312	BC011935	COMT	COMT	816	0	0	*	5497	3043	2955	-0.895486	0	4590	0.593	0	0	0	0	0	0	154	0	0	0	0	1	0	0	6182	1.02258	0	0	0	0	0	0	1039	-1.5503	0	0	0	25	0	0	568	-2.42153	0	0	0
118881	BC047774	COMTD1	COMTD1	789	0	0	*	5071	3155	0	0	0	0	0	0	0	0	0	0	0	0	0	0	0	0	71	0	0	3588	0.18554	0	0	0	0	0	0	0	0	0	0	0	469	0	0	0	0	0	0	0
817	BC032784	CAMK2D	CAMK2D	1437	0	0	*	50	849	0	0	0	0	0	0	0	0	0	0	0	0	0	0	0	0	0	0	0	0	0	0	0	0	100	0	0	0	0	0	0	0	0	0	0	0	0	0	0	0
8533	BC001891	COPS3	COPS3	1272	1	0	Unknown	1068	2996	4903	2.19875	1	78	-5.26342	0	1	0	0	0	0	6313	1.07529	0	0	0	0	0	0	1403	-1.09452	0	0	0	0	0	0	12080	2.01151	1	1	0	721	-0.56684	0	0	0	0	0	0
2560	BC022449	GABRB1	GABRB1	1425	0	0	*	507	615	0	0	0	0	0	0	0	0	0	0	0	0	0	0	0	0	0	0	0	2182	1.82699	1	1	0	0	0	0	20	0	0	0	0	0	0	0	0	0	0	0	0
50813	BC011789	COPS7A	COPS7A	828	0	0	*	2884	886	0	0	0	1163	0.392472	0	0	0	6192	1.10233	0	0	0	0	0	0	433	0	0	0	0	0	0	0	683	-2.07811	0	2859	1.69013	1	1	0	0	0	0	8972	3.34005	1	1	0
64708	BC010739	COPS7B	COPS7B	474	0	0	*	980	253	0	0	0	0	0	0	0	0	0	0	0	0	0	0	0	0	0	0	0	0	0	0	0	0	0	0	0	0	0	0	0	0	0	0	0	0	0	0	0	0
80219	BC022453	FLJ13448	COQ10B	717	0	0	*	3367	6754	4303	0.353879	0	0	0	0	0	0	0	0	0	0	0	0	0	0	0	0	0	0	0	0	0	0	0	0	0	0	0	0	0	0	0	0	0	0	0	0	0	0
51117	BC011895	COQ4	COQ4	798	0	0	*	133	159	0	0	0	0	0	0	0	0	0	0	0	0	0	0	0	0	0	0	0	0	0	0	0	0	0	0	0	0	0	0	0	0	0	0	0	0	0	0	0	0
51004	BC014483	COQ6	COQ6	1407	0	0	*	167	150	0	0	0	0	0	0	0	0	0	0	0	0	0	0	0	0	0	0	0	0	0	0	0	0	0	0	0	0	0	0	0	0	8	0	0	415	0	0	0	0
10229	BC003185	COQ7	COQ7	654	0	0	*	476	755	0	0	0	252	-1.58305	0	0	0	0	0	0	756	0.00190959	0	0	0	0	0	0	0	0	0	0	0	0	0	0	2819	1.90063	1	1	0	0	0	0	0	0	0	0	0
57175	BC006449	CORO1B	CORO1B	1470	0	0	*	1462	262	7167	2.29343	1	0	0	0	1	0	12000	3.03702	1	0	0	0	1	0	0	0	0	49	0	0	0	0	0	0	0	428	0	0	0	0	0	0	0	9207	5.13509	1	1	0
11157	BC016026	LSM6	LSM6	243	0	0	*	50	1913	45	0	0	13673	2.83742	1	1	0	14192	8.14893	1	0	0	0	1	8.14893	0	0	0	1876	-0.028177	0	0	0	0	0	0	8690	2.18352	1	1	0	16624	8.37712	1	0	0	0	1	8.37712
2653	BC009065	GCSH	GCSH	297	0	0	*	607	50	518	-0.228744	0	0	0	0	0	0	0	0	0	1281	4.6792	1	1	0	66	0	0	871	4.12267	1	1	0	103	0	0	22	0	0	0	0	3	0	0	14	0	0	0	0
10391	BC026335	CORO2B	CORO2B	1428	0	0	*	1482	2846	0	0	0	528	-2.43033	0	0	0	0	0	0	0	0	0	0	0	0	0	0	831	-1.77602	0	0	0	0	0	0	84	0	0	0	0	0	0	0	0	0	0	0	0
84940	BC064514	CORO6	CORO6	714	0	0	*	2235	1180	51	0	0	0	0	0	0	0	274	0	0	417	0	0	0	0	0	0	0	0	0	0	0	0	1118	-0.999355	0	0	0	0	0	0	0	0	0	0	0	0	0	0
23406	BC042970	COTL1	COTL1	429	0	0	*	4807	3261	3822	-0.330809	0	0	0	0	0	0	0	0	0	3195	-0.0294985	0	0	0	3998	-0.265858	0	7010	1.1041	0	0	0	2669	-0.848837	0	816	-1.99867	0	0	0	4467	-0.105831	0	2077	-0.650813	0	0	0
9518	BC000529	GDF15	GDF15	927	0	0	*	710	1354	0	0	0	0	0	0	0	0	164	0	0	0	0	0	0	0	627	-0.179354	0	8227	2.60314	1	1	0	0	0	0	0	0	0	0	0	0	0	0	0	0	0	0	0
93661	BC016745	CAPZA3	CAPZA3	900	0	0	*	50	187	0	0	0	0	0	0	0	0	0	0	0	0	0	0	0	0	0	0	0	0	0	0	0	0	0	0	0	0	0	0	0	0	9255	7.53216	1	0	0	0	1	7.53216
84987	BC007849	MGC14288	COX14	174	0	0	*	182	228	0	0	0	113	-1.01271	0	0	0	219	0	0	741	1.70044	1	1	0	37	0	0	0	0	0	0	0	296	0	0	0	0	0	0	0	0	0	0	0	0	0	0	0
10063	BC010933	COX17	COX17	192	0	0	*	407	428	0	0	0	0	0	0	0	0	0	0	0	0	0	0	0	0	0	0	0	0	0	0	0	0	0	0	0	0	0	0	0	0	0	0	0	0	0	0	0	0
9945	BC000012	GFPT2	GFPT2	2049	0	0	*	50	50	1375	4.78136	1	0	0	0	1	0	0	0	0	0	0	0	0	0	0	0	0	724	3.85599	1	1	0	0	0	0	0	0	0	0	0	2182	5.44758	1	0	0	0	1	0
1337	BC007723	COX6A1	COX6A1	330	0	0	*	1776	1617	195	0	0	6916	2.09662	1	1	0	0	0	0	2670	0.72352	0	0	0	0	0	0	0	0	0	0	0	0	0	0	612	-1.40172	0	0	0	0	0	0	0	0	0	0	0
9167	BC007095	COX7A2L	COX7A2L	345	0	0	*	3114	6875	0	0	0	564	-3.60759	0	0	0	1534	-1.02147	0	571	-3.5898	0	0	0	2960	-0.0731718	0	3401	-1.0154	0	0	0	0	0	0	1638	-2.06942	0	0	0	0	0	0	3406	-1.01328	0	0	0
2675	BC041688	GFRA2	GFRA2	1395	0	0	*	4242	399	0	0	0	0	0	0	0	0	0	0	0	0	0	0	0	0	5596	0.399651	0	1332	1.73913	1	1	0	0	0	0	0	0	0	0	0	0	0	0	0	0	0	0	0
79017	BC000625	C7orf24	GGCT	567	0	0	*	50	337	1292	4.69153	1	4	0	0	1	0	2027	5.34127	1	370	0	0	1	0	0	0	0	1274	1.91854	1	1	0	0	0	0	0	0	0	0	0	0	0	0	0	0	0	0	0
1357	BC005279	CPA1	CPA1	1260	0	0	*	7964	5486	1679	-2.24589	0	0	0	0	0	0	0	0	0	664	-3.0465	0	0	0	0	0	0	2527	-1.11833	0	0	0	3139	-1.34319	0	3390	-0.694469	0	0	0	6	0	0	1869	-1.55349	0	0	0
64866	BC021099	CDCP1	CDCP1	1032	0	0	*	50	50	0	0	0	0	0	0	0	0	0	0	0	0	0	0	0	0	0	0	0	0	0	0	0	0	0	0	0	0	0	0	0	0	5992	6.90497	1	0	0	0	1	6.90497
51200	BC052289	CPA4	CPA4	1266	0	0	*	3075	50	0	0	0	0	0	0	0	0	0	0	0	0	0	0	0	0	0	0	0	0	0	0	0	0	0	0	0	10660	7.73606	1	1	0	0	0	0	0	0	0	0	0
64506	BC050629	CPEB1	CPEB1	1686	1	1	Unknown	1094	1420	5485	2.32588	1	0	0	0	1	0	0	0	0	0	0	0	0	0	0	0	0	1476	0.0558018	0	0	0	0	0	0	0	0	0	0	0	3	0	0	0	0	0	0	0
79363	BC002946	C1orf89	CPLANE2	777	0	0	*	2612	1941	2530	-0.0460175	0	0	0	0	0	0	0	0	0	0	0	0	0	0	71	0	0	0	0	0	0	0	0	0	0	288	0	0	0	0	2928	0.164761	0	0	0	0	0	0
594855	BC018026	CPLX3	CPLX3	477	0	0	*	2068	2653	3163	0.613057	0	0	0	0	0	0	0	0	0	0	0	0	0	0	0	0	0	468	0	0	0	0	0	0	0	0	0	0	0	0	197	0	0	0	0	0	0	0
221184	BC053658	CPNE2	CPNE2	1647	0	0	*	50	87	53	0	0	0	0	0	0	0	0	0	0	0	0	0	0	0	0	0	0	0	0	0	0	0	1373	4.77926	1	0	0	0	1	0	0	0	0	0	0	0	0	0
131034	BC014396	CPNE4	CPNE4	1674	0	0	*	614	2681	0	0	0	0	0	0	0	0	6849	3.47958	1	0	0	0	1	0	0	0	0	0	0	0	0	0	0	0	0	0	0	0	0	0	0	0	0	0	0	0	0	0
55313	BC006289	FLJ11151	CPPED1	945	0	0	*	1503	2434	3	0	0	4214	0.791861	0	0	0	5425	1.85178	1	0	0	0	1	0	1	0	0	0	0	0	0	0	0	0	0	0	0	0	0	0	0	0	0	7296	1.58378	1	1	0
29034	BC020670	PRO0132	CPS1-IT1	159	0	0	*	2203	702	0	0	0	0	0	0	0	0	0	0	0	0	0	0	0	0	0	0	0	0	0	0	0	0	0	0	0	0	0	0	0	0	0	0	0	5220	2.89451	1	1	0
10898	BC050738	CPSF4	CPSF4	732	1	0	CCCH ZF	9819	8195	9831	0.00176207	0	13524	0.722706	0	0	0	0	0	0	8243	0.00842555	0	0	0	901	-3.44598	0	13963	0.768793	0	0	0	8066	-0.283723	0	12751	0.637795	0	0	0	80	0	0	14357	0.808938	0	0	0
11052	BC000714	CPSF6	CPSF6	1767	0	0	*	50	72	908	4.18269	1	0	0	0	1	0	0	0	0	0	0	0	0	0	0	0	0	0	0	0	0	0	0	0	0	0	0	0	0	0	0	0	0	0	0	0	0	0
79869	BC018135	FLJ12529	CPSF7	1416	0	0	*	378	727	0	0	0	0	0	0	0	0	0	0	0	0	0	0	0	0	0	0	0	0	0	0	0	0	0	0	0	0	0	0	0	0	0	0	0	0	0	0	0	0
92086	BC040904	GGTLA4	GGTLC1	678	0	0	*	1594	1264	0	0	0	7	0	0	0	0	8986	2.49503	1	0	0	0	1	0	0	0	0	5898	2.22223	1	1	0	0	0	0	3325	1.39536	0	0	0	6	0	0	0	0	0	0	0
1381	BC022069	CRABP1	CRABP1	414	0	0	*	1862	2153	3123	0.746079	0	1642	-0.390894	0	0	0	1589	-0.228734	0	4229	0.973968	0	0	0	4086	1.13384	0	5828	1.43665	0	0	0	2294	0.301012	0	2358	0.131215	0	0	0	1284	-0.536208	0	5067	1.23478	0	0	0
1382	BC001109	CRABP2	CRABP2	417	1	1	NA	189	827	11	0	0	0	0	0	0	0	0	0	0	0	0	0	0	0	0	0	0	0	0	0	0	0	0	0	0	1190	0.525002	0	0	0	175	0	0	222	0	0	0	0
283229	BC033196	MGC45840	CRACR2B	885	0	0	*	2762	1863	224	0	0	35	0	0	0	0	0	0	0	2470	0.406883	0	0	0	93	0	0	2757	0.565472	0	0	0	3508	0.344935	0	25	0	0	0	0	0	0	0	3877	1.05731	0	0	0
8738	BC037905	CRADD	CRADD	600	0	0	*	5049	4201	5579	0.144009	0	0	0	0	0	0	1918	-1.39639	0	0	0	0	0	0	1	0	0	0	0	0	0	0	1475	-1.77528	0	15235	1.85858	1	1	0	455	0	0	0	0	0	0	0
2702	BC013313	GJA5	GJA5	1077	0	0	*	4648	1392	0	0	0	0	0	0	0	0	0	0	0	0	0	0	0	0	0	0	0	5437	1.96565	1	1	0	0	0	0	0	0	0	0	0	0	0	0	4763	1.77471	1	1	0
27297	BC040107	RCP9	CRCP	348	0	0	*	5279	8205	1708	-1.62796	0	0	0	0	0	0	17808	1.75419	1	31	0	0	1	0	0	0	0	9688	0.239696	0	0	0	0	0	0	1238	-2.72849	0	0	0	560	-3.23677	0	485	0	0	0	0
57119	BC053369	SPINLW1	EPPIN	402	0	0	*	50	1988	0	0	0	0	0	0	0	0	5863	6.87357	1	0	0	0	1	6.87357	0	0	0	0	0	0	0	0	38	0	0	0	0	0	0	0	0	0	0	0	0	0	0	0
219970	BC016789	GLYATL2	GLYATL2	885	0	0	*	2157	2003	16	0	0	0	0	0	0	0	9918	2.20102	1	0	0	0	1	0	0	0	0	8951	2.15989	1	1	0	3778	0.808597	0	0	0	0	0	0	0	0	0	0	0	0	0	0
23432	BC028163	GPR161	GPR161	1590	0	0	*	878	1567	0	0	0	0	0	0	0	0	0	0	0	0	0	0	0	0	0	0	0	7396	2.23874	1	1	0	0	0	0	0	0	0	0	0	0	0	0	0	0	0	0	0
84191	BC008865	FLJ22875	CIAO2A	483	0	0	*	50	534	0	0	0	0	0	0	0	0	0	0	0	0	0	0	0	0	0	0	0	0	0	0	0	0	0	0	0	0	0	0	0	0	0	0	0	2368	2.14876	1	1	0
9290	BC032694	GPR55	GPR55	960	0	0	*	5483	3898	1044	-2.39284	0	0	0	0	0	0	0	0	0	0	0	0	0	0	0	0	0	11359	1.54303	1	1	0	5245	-0.0640227	0	9892	1.34353	0	0	0	14	0	0	0	0	0	0	0
7180	BC022011	CRISP2	CRISP2	732	0	0	*	5158	2178	0	0	0	0	0	0	0	0	0	0	0	0	0	0	0	0	0	0	0	0	0	0	0	0	0	0	0	0	0	0	0	0	0	0	0	0	0	0	0	0
10321	BC069580	CRISP3	CRISP3	738	0	0	*	1020	3196	630	-0.695145	0	0	0	0	0	0	2849	1.48189	0	3967	0.311781	0	0	0	0	0	0	0	0	0	0	0	0	0	0	0	0	0	0	0	0	0	0	775	-2.044	0	0	0
27201	BC057778	GPR78	GPR78	1092	0	0	*	630	846	0	0	0	0	0	0	0	0	0	0	0	0	0	0	0	0	0	0	0	3713	2.13386	1	1	0	0	0	0	0	0	0	0	0	0	0	0	748	-0.177619	0	0	0
84809	BC047736	MGC12760	CROCCP2	336	0	0	*	6380	1039	0	0	0	5845	2.49201	1	1	0	767	-3.05626	0	1189	0.194553	0	0	0	0	0	0	0	0	0	0	0	2344	-1.44458	0	210	0	0	0	0	2041	-1.64428	0	678	-0.615838	0	0	0
55118	BC034245	CRTAC1	CRTAC1	1356	0	0	*	3762	1657	467	0	0	21	0	0	0	0	0	0	0	6529	1.97829	1	1	0	0	0	0	15	0	0	0	0	0	0	0	5415	1.70839	1	1	0	0	0	0	4652	1.48928	0	0	0
10491	BC008745	CRTAP	CRTAP	1206	0	0	*	291	162	3075	3.4015	1	0	0	0	1	0	0	0	0	0	0	0	0	0	218	0	0	3	0	0	0	0	279	0	0	92	0	0	0	0	0	0	0	1288	2.99107	1	1	0
57655	BC014077	KIAA1533	GRAMD1A	1953	0	0	*	1681	2097	0	0	0	0	0	0	0	0	0	0	0	0	0	0	0	0	809	-1.05511	0	8707	2.05385	1	1	0	2678	0.671836	0	0	0	0	0	0	0	0	0	0	0	0	0	0
1408	BC041814	CRY2	CRY2	1782	0	0	*	3024	2160	0	0	0	0	0	0	0	0	0	0	0	4754	1.13811	0	0	0	533	-2.50425	0	0	0	0	0	0	323	0	0	0	0	0	0	0	0	0	0	983	-1.13577	0	0	0
2948	BC015513	GSTM4	GSTM4	657	0	0	*	3588	2416	0	0	0	0	0	0	0	0	4164	0.21479	0	1883	-0.359587	0	0	0	6315	0.815603	0	23284	3.26865	1	1	0	0	0	0	0	0	0	0	0	0	0	0	0	0	0	0	0
1412	BC006285	CRYBA2	CRYBA2	594	0	0	*	135	193	0	0	0	110	-0.811097	0	0	0	0	0	0	1003	2.37765	1	1	0	27	0	0	0	0	0	0	0	0	0	0	11	0	0	0	0	233	0	0	2229	3.52972	1	1	0
1413	BC069404	CRYBA4	CRYBA4	591	0	0	*	474	580	0	0	0	6615	3.51162	1	1	0	0	0	0	0	0	0	0	0	0	0	0	1201	1.05011	0	0	0	0	0	0	0	0	0	0	0	0	0	0	0	0	0	0	0
1414	BC036790	CRYBB1	CRYBB1	759	0	0	*	50	50	1524	4.92979	1	0	0	0	1	0	0	0	0	0	0	0	0	0	1	0	0	43	0	0	0	0	0	0	0	0	0	0	0	0	0	0	0	0	0	0	0	0
1428	BC018061	CRYM	CRYM	945	0	0	*	1814	2890	4767	1.39391	0	0	0	0	0	0	0	0	0	0	0	0	0	0	0	0	0	1005	-1.52387	0	0	0	707	-1.35939	0	0	0	0	0	0	0	0	0	0	0	0	0	0
9946	BC013155	CRYZL1	CRYZL1	342	0	0	*	50	3043	0	0	0	1557	-0.966725	0	0	0	0	0	0	5418	0.832266	0	0	0	0	0	0	7912	1.37855	0	0	0	0	0	0	0	0	0	0	0	541	3.43563	1	7130	1.22841	0	1	0
2954	BC001453	GSTZ1	GSTZ1	651	0	0	*	4445	1114	1447	-1.61912	0	12648	3.50509	1	1	0	6685	0.588744	0	11021	3.30643	1	1	0	0	0	0	3628	1.70343	1	1	0	1437	-1.62912	0	15285	3.7783	1	1	0	0	0	0	18635	4.06419	1	1	0
389903	BC013171	CSAG3A	CSAG3	132	0	0	*	85	2693	0	0	0	0	0	0	0	0	0	0	0	0	0	0	0	0	0	0	0	7185	1.41577	0	0	0	1634	4.2648	1	0	0	0	1	0	0	0	0	0	0	0	0	0
55454	BC030268	GALNACT-2	CSGALNACT2	1629	0	0	*	2619	237	0	0	0	25	0	0	0	0	0	0	0	0	0	0	0	0	0	0	0	0	0	0	0	0	1173	-1.15881	0	0	0	0	0	0	0	0	0	0	0	0	0	0
1442	BC057768	CSH1	CSH1	654	0	0	*	4573	7044	2413	-0.922313	0	13514	0.939988	0	0	0	0	0	0	6359	-0.147595	0	0	0	3601	-0.344743	0	507	-3.79634	0	0	0	786	-2.54054	0	2104	-1.74326	0	0	0	0	0	0	1412	-2.31865	0	0	0
1443	BC022044	CSH2	CSH2	654	0	0	*	1980	777	1335	-0.568661	0	11	0	0	0	0	0	0	0	31	0	0	0	0	0	0	0	0	0	0	0	0	67	0	0	5114	2.71847	1	1	0	0	0	0	803	0.0474854	0	0	0
122011	BC028723	CSNK1A1L	CSNK1A1L	1014	0	0	*	1731	228	0	0	0	0	0	0	0	0	0	0	0	0	0	0	0	0	0	0	0	0	0	0	0	0	0	0	0	0	0	0	0	0	0	0	0	0	0	0	0	0
1453	BC015775	CSNK1D	CSNK1D	1230	0	0	*	1899	1514	0	0	0	0	0	0	0	0	3671	0.950933	0	0	0	0	0	0	536	-1.82493	0	0	0	0	0	0	0	0	0	3649	1.26914	0	0	0	0	0	0	5552	1.87464	1	1	0
53944	BC017236	CSNK1G1	CSNK1G1	924	0	0	*	2123	1941	0	0	0	0	0	0	0	0	0	0	0	0	0	0	0	0	1815	-0.226135	0	0	0	0	0	0	6412	1.59467	1	0	0	0	1	0	0	0	0	0	0	0	0	0
29083	BC037163	HSPC135	GTPBP8	855	0	0	*	2260	733	2226	-0.0218692	0	35	0	0	0	0	0	0	0	108	0	0	0	0	123	0	0	2888	1.97819	1	1	0	0	0	0	0	0	0	0	0	0	0	0	152	0	0	0	0
1459	BC008812	CSNK2A2	CSNK2A2	1053	0	0	*	281	137	0	0	0	2525	4.20404	1	1	0	0	0	0	0	0	0	0	0	0	0	0	0	0	0	0	0	1607	2.51573	1	0	0	0	1	0	0	0	0	0	0	0	0	0
1473	BC069514	CST5	CST5	429	0	0	*	2646	1991	0	0	0	0	0	0	0	0	0	0	0	0	0	0	0	0	0	0	0	2735	0.458048	0	0	0	0	0	0	0	0	0	0	0	0	0	0	0	0	0	0	0
9694	BC020753	KIAA0103	EMC2	894	0	0	*	50	1326	0	0	0	0	0	0	0	0	0	0	0	0	0	0	0	0	0	0	0	9	0	0	0	0	0	0	0	0	0	0	0	0	0	0	0	0	0	0	0	0
128821	BC029656	CST9L	CST9L	444	0	0	*	50	1049	2928	5.87184	1	0	0	0	1	0	0	0	0	1574	0.585421	0	0	0	0	0	0	0	0	0	0	0	0	0	0	0	0	0	0	0	0	0	0	0	0	0	0	0
23283	BC028239	CSTF2T	CSTF2T	1851	0	0	*	1380	284	0	0	0	0	0	0	0	0	0	0	0	0	0	0	0	0	0	0	0	0	0	0	0	0	0	0	0	0	0	0	0	0	0	0	0	0	0	0	0	0
1479	BC009792	CSTF3	CSTF3	312	0	0	*	2151	1957	0	0	0	0	0	0	0	0	0	0	0	5449	1.47735	0	0	0	0	0	0	0	0	0	0	0	0	0	0	6793	1.79541	1	1	0	0	0	0	0	0	0	0	0
2140	BC041667	EYA3	EYA3	1611	1	1	NA	50	718	0	0	0	0	0	0	0	0	0	0	0	0	0	0	0	0	0	0	0	0	0	0	0	0	0	0	0	0	0	0	0	0	0	0	0	0	0	0	0	0
92070	BC013775	MGC21675	CTBP1-DT	276	0	0	*	2039	1972	0	0	0	57	-5.11255	0	0	0	5260	1.3672	0	895	-1.1397	0	0	0	0	0	0	107	0	0	0	0	0	0	0	251	0	0	0	0	2326	0.189989	0	1661	-0.247607	0	0	0
1369	BC027897	CPN1	CPN1	1377	0	0	*	75	1857	0	0	0	0	0	0	0	0	0	0	0	1929	0.0548793	0	0	0	0	0	0	6	0	0	0	0	0	0	0	0	0	0	0	0	5215	6.11963	1	1066	-0.800766	0	1	6.11963
1486	BC024007	CTBS	CTBS	318	0	0	*	1016	2313	0	0	0	0	0	0	0	0	877	-0.212252	0	0	0	0	0	0	266	0	0	0	0	0	0	0	0	0	0	3	0	0	0	0	657	-0.628935	0	0	0	0	0	0
22943	BC001539	DKK1	DKK1	801	0	0	*	50	481	0	0	0	0	0	0	0	0	0	0	0	0	0	0	0	0	0	0	0	0	0	0	0	0	179	0	0	1330	1.46732	0	0	0	0	0	0	8141	4.0811	1	1	0
2993	BC005319	GYPA	GYPA	453	0	0	*	1234	1270	0	0	0	0	0	0	0	0	0	0	0	309	0	0	0	0	0	0	0	10757	3.08238	1	1	0	0	0	0	0	0	0	0	0	0	0	0	0	0	0	0	0
201562	BC060839	PTPLB	HACD2	765	0	0	*	50	212	0	0	0	5012	4.56325	1	1	0	0	0	0	4600	4.4395	1	1	0	0	0	0	1528	2.84951	1	1	0	0	0	0	45	0	0	0	0	0	0	0	1717	3.01775	1	1	0
1839	BC033097	HBEGF	HBEGF	627	0	0	*	2474	874	1452	-0.768804	0	0	0	0	0	0	0	0	0	0	0	0	0	0	478	0	0	7338	3.06968	1	1	0	0	0	0	11756	3.74962	1	1	0	3	0	0	4195	2.26297	1	1	0
56259	BC036739	CTNNBL1	CTNNBL1	936	1	0	NA	2252	765	37	0	0	571	-0.421969	0	0	0	0	0	0	3427	2.16341	1	1	0	1038	-1.1174	0	76	0	0	0	0	0	0	0	408	0	0	0	0	0	0	0	0	0	0	0	0
1504	BC005385	CTRB1	CTRB1	792	0	0	*	4234	5861	0	0	0	0	0	0	0	0	548	-2.94977	0	0	0	0	0	0	2494	-0.76356	0	0	0	0	0	0	0	0	0	0	0	0	0	0	0	0	0	2949	-0.990921	0	0	0
57721	BC006565	KIAA1627	METTL14	1371	0	0	*	50	312	9599	7.58481	1	0	0	0	1	7.58481	0	0	0	0	0	0	0	0	0	0	0	0	0	0	0	0	0	0	0	0	0	0	0	0	0	0	0	0	0	0	0	0
1508	BC010240	CTSB	CTSB	1020	0	0	*	666	1139	0	0	0	0	0	0	0	0	0	0	0	1096	-0.0555199	0	0	0	1168	0.810446	0	0	0	0	0	0	0	0	0	0	0	0	0	0	0	0	0	0	0	0	0	0
1509	BC016320	CTSD	CTSD	1239	0	0	*	3968	1723	283	0	0	0	0	0	0	0	0	0	0	0	0	0	0	0	438	0	0	0	0	0	0	0	1376	-1.52793	0	0	0	0	0	0	649	-2.61212	0	803	-1.10145	0	0	0
1510	BC042537	CTSE	CTSE	1191	0	0	*	5897	4625	51	0	0	35582	2.94362	1	1	0	0	0	0	14324	1.63091	1	1	0	3664	-0.686562	0	2378	-0.959705	0	0	0	0	0	0	2518	-0.877175	0	0	0	3829	-0.623014	0	12696	1.45685	0	0	0
1511	BC014460	CTSG	CTSG	768	0	0	*	50	97	1756	5.13422	1	0	0	0	1	0	0	0	0	0	0	0	0	0	0	0	0	0	0	0	0	0	0	0	0	0	0	0	0	0	0	0	0	83	0	0	0	0
1513	BC016058	CTSK	CTSK	990	0	0	*	3943	2562	0	0	0	0	0	0	0	0	6849	0.7966	0	11839	2.2082	1	1	0	0	0	0	0	0	0	0	0	0	0	0	8302	1.69619	1	1	0	0	0	0	0	0	0	0	0
1514	BC012612	CTSL	CTSL	1002	0	0	*	1441	1192	376	0	0	0	0	0	0	0	0	0	0	0	0	0	0	0	3035	1.07463	0	0	0	0	0	0	0	0	0	0	0	0	0	0	0	0	0	0	0	0	0	0
8969	BC016677	HIST1H2AG	HIST1H2AG	393	0	0	*	5859	7674	12185	1.05638	0	646	-3.57037	0	0	0	1863	-1.65303	0	22814	1.57187	1	1	0	13310	1.18378	0	40985	2.41705	1	1	0	8765	0.5811	0	12435	0.696356	0	0	0	9374	0.67801	0	6964	-0.140063	0	0	0
8347	BC009612	HIST1H2BC	HIST1H2BC	381	1	0	NA	1348	1473	2026	0.587814	0	0	0	0	0	0	1699	0.333865	0	0	0	0	0	0	3	0	0	5293	1.84533	1	1	0	4623	1.77801	1	1568	0.0901681	0	1	0	0	0	0	0	0	0	0	0
55917	BC016029	CTTNBP2NL	CTTNBP2NL	1920	0	0	*	1226	128	0	0	0	0	0	0	0	0	0	0	0	0	0	0	0	0	0	0	0	0	0	0	0	0	0	0	0	0	0	0	0	0	0	0	0	0	0	0	0	0
3205	BC006537	HOXA9	HOXA9	819	1	1	Homeodomain	50	562	0	0	0	0	0	0	0	0	0	0	0	0	0	0	0	0	23	0	0	0	0	0	0	0	4283	6.42055	1	0	0	0	1	6.42055	0	0	0	0	0	0	0	0
51596	BC005890	C6orf82	CUTA	471	0	0	*	346	821	0	0	0	0	0	0	0	0	548	0.663404	0	3103	1.91821	1	1	0	948	1.45412	0	0	0	0	0	0	0	0	0	0	0	0	0	0	0	0	0	0	0	0	0	0
51076	BC021105	CUTC	CUTC	822	0	0	*	1593	2294	13	0	0	0	0	0	0	0	0	0	0	0	0	0	0	0	0	0	0	5073	1.14497	0	0	0	0	0	0	260	0	0	0	0	0	0	0	0	0	0	0	0
51503	BC040946	HSPC148	CWC15	690	0	0	*	1289	1776	0	0	0	0	0	0	0	0	0	0	0	0	0	0	0	0	0	0	0	0	0	0	0	0	0	0	0	0	0	0	0	0	0	0	0	402	0	0	0	0
54883	BC008833	FLJ20291	CWC25	1278	0	0	*	944	250	0	0	0	0	0	0	0	0	0	0	0	0	0	0	0	0	274	0	0	3	0	0	0	0	0	0	0	433	0	0	0	0	0	0	0	0	0	0	0	0
55280	BC008746	CWF19L1	CWF19L1	1617	0	0	*	3621	3271	0	0	0	0	0	0	0	0	0	0	0	0	0	0	0	0	12	0	0	0	0	0	0	0	0	0	0	12720	1.9593	1	1	0	0	0	0	0	0	0	0	0
6376	BC001163	CX3CL1	CX3CL1	1194	0	0	*	296	1127	0	0	0	0	0	0	0	0	0	0	0	12179	3.43384	1	1	0	27	0	0	0	0	0	0	0	0	0	0	0	0	0	0	0	0	0	0	1246	0.144817	0	0	0
8351	BC031333	HIST1H3D	HIST1H3D	411	0	0	*	6009	7309	0	0	0	3401	-1.10372	0	0	0	14301	1.25092	0	5402	-0.43618	0	0	0	7899	0.394545	0	21261	1.54046	1	1	0	10466	0.800513	0	3546	-1.04348	0	0	0	19514	1.69931	1	5912	-0.306028	0	1	0
8357	BC007518	HIST1H3H	HIST1H3H	411	0	0	*	1852	1473	2264	0.28979	0	0	0	0	0	0	493	0	0	0	0	0	0	0	1983	0.0986006	0	5373	1.86697	1	1	0	0	0	0	380	0	0	0	0	0	0	0	0	0	0	0	0
6374	BC008376	CXCL5	CXCL5	345	0	0	*	4339	4613	6153	0.503927	0	500	-3.20571	0	0	0	2411	-0.847731	0	1219	-1.92001	0	0	0	2615	-0.730552	0	0	0	0	0	0	6770	0.641793	0	13340	1.53198	1	1	0	0	0	0	1758	-1.39177	0	0	0
6372	BC013744	CXCL6	CXCL6	345	0	0	*	1711	634	0	0	0	0	0	0	0	0	0	0	0	3427	2.43439	1	1	0	0	0	0	0	0	0	0	0	0	0	0	3255	2.3601	1	1	0	0	0	0	0	0	0	0	0
4283	BC063122	CXCL9	CXCL9	378	0	0	*	8112	5268	3948	-1.03894	0	0	0	0	0	0	2137	-1.92447	0	895	-2.5573	0	0	0	8	0	0	0	0	0	0	0	0	0	0	0	0	0	0	0	0	0	0	0	0	0	0	0
3577	BC028221	IL8RA	CXCR1	1053	0	0	*	2276	3633	0	0	0	0	0	0	0	0	0	0	0	0	0	0	0	0	0	0	0	0	0	0	0	0	3273	0.524113	0	841	-2.11098	0	0	0	0	0	0	0	0	0	0	0
8361	BC069288	HIST1H4F	HIST1H4F	312	0	0	*	7481	6182	13979	0.901958	0	14773	1.25682	0	0	0	7123	-0.0707461	0	8582	0.47324	0	0	0	9811	0.391169	0	34708	2.48912	1	1	0	16978	1.18236	0	33345	2.43132	1	1	0	3	0	0	11422	0.88567	0	0	0
80231	BC020611	CXorf21	CXorf21	906	0	0	*	1775	50	0	0	0	0	0	0	0	0	0	0	0	0	0	0	0	0	786	-1.17522	0	0	0	0	0	0	0	0	0	0	0	0	0	0	0	0	0	0	0	0	0	0
8337	BC001629	HIST2H2AA	HIST2H2AA3	393	0	0	*	901	811	0	0	0	6104	2.91198	1	1	0	0	0	0	0	0	0	0	0	2020	1.16476	0	8132	3.32584	1	1	0	628	-0.520763	0	0	0	0	0	0	0	0	0	0	0	0	0	0
63932	BC023506	FLJ22965	CXorf56	669	0	0	*	50	109	0	0	0	0	0	0	0	0	658	3.71809	1	0	0	0	1	0	0	0	0	0	0	0	0	0	0	0	0	0	0	0	0	0	0	0	0	0	0	0	0	0
58475	BC020673	MS4A7	MS4A7	723	0	0	*	50	515	0	0	0	0	0	0	0	0	986	4.30159	1	0	0	0	1	0	0	0	0	6283	3.60881	1	1	0	0	0	0	0	0	0	0	0	0	0	0	0	0	0	0	0
1534	BC002976	CYB561	CYB561	756	0	0	*	8595	7671	16552	0.945436	0	0	0	0	0	0	3616	-1.2491	0	1235	-2.6349	0	0	0	1	0	0	0	0	0	0	0	8163	-0.0743982	0	584	-3.71537	0	0	0	0	0	0	1371	-2.48419	0	0	0
11068	BC047691	CYB561D2	CYB561D2	669	0	0	*	1876	1941	12722	2.76159	1	0	0	0	1	0	0	0	0	0	0	0	0	0	1578	-0.249563	0	0	0	0	0	0	0	0	0	0	0	0	0	0	0	0	0	0	0	0	0	0
124936	BC051697	MGC32124	CYB5D2	795	0	0	*	1024	2774	4063	1.98833	1	0	0	0	1	0	0	0	0	0	0	0	0	0	0	0	0	3	0	0	0	0	2904	1.50383	1	0	0	0	1	0	0	0	0	0	0	0	0	0
51706	BC018732	CYB5R1	CYB5R1	918	0	0	*	544	459	251	0	0	0	0	0	0	0	0	0	0	0	0	0	0	0	1508	1.47096	0	1091	1.24909	0	0	0	0	0	0	0	0	0	0	0	0	0	0	0	0	0	0	0
1536	BC032720	CYBB	CYBB	1713	0	0	*	50	1089	2653	5.72955	1	60	-4.1819	0	1	0	0	0	0	0	0	0	0	0	0	0	0	0	0	0	0	0	0	0	0	0	0	0	0	0	0	0	0	0	0	0	0	0
79901	BC065290	CYBRD1	CYBRD1	861	0	0	*	409	771	0	0	0	0	0	0	0	0	0	0	0	0	0	0	0	0	0	0	0	932	0.273599	0	0	0	0	0	0	0	0	0	0	0	0	0	0	817	0.0836052	0	0	0
54205	BC014359	CYCS	CYCS	318	0	0	*	3614	4366	6828	0.917867	0	2355	-0.890585	0	0	0	3507	-0.0433591	0	9709	1.15301	0	0	0	64	0	0	1079	-2.01662	0	0	0	1939	-0.898284	0	12804	1.55221	1	1	0	3	0	0	0	0	0	0	0
114757	BC029798	CYGB	CYGB	573	0	0	*	3567	2653	0	0	0	14720	2.47208	1	1	0	0	0	0	0	0	0	0	0	905	-1.97872	0	0	0	0	0	0	285	0	0	0	0	0	0	0	0	0	0	0	0	0	0	0
1583	BC032329	CYP11A1	CYP11A1	1566	0	0	*	2006	234	0	0	0	0	0	0	0	0	0	0	0	0	0	0	0	0	0	0	0	0	0	0	0	0	0	0	0	0	0	0	0	0	0	0	0	0	0	0	0	0
1588	BC035959	CYP19A1	CYP19A1	1512	0	0	*	8715	3832	2258	-1.94846	0	1922	-0.995489	0	0	0	1260	-2.79008	0	15	0	0	0	0	679	-3.68202	0	2313	-0.728332	0	0	0	783	-3.47642	0	3703	-0.049403	0	0	0	2573	-1.76005	0	97	0	0	0	0
285154	BC031410	MGC34824	CYP1B1-AS1	429	0	0	*	2403	3105	0	0	0	0	0	0	0	0	0	0	0	0	0	0	0	0	0	0	0	0	0	0	0	0	0	0	0	0	0	0	0	0	3	0	0	0	0	0	0	0
57404	BC020616	CYP20A1	CYP20A1	1389	0	0	*	2976	1557	0	0	0	0	0	0	0	0	0	0	0	0	0	0	0	0	0	0	0	0	0	0	0	0	6412	1.1074	0	0	0	0	0	0	0	0	0	0	0	0	0	0
1556	BC041174	CYP2B7P1	CYP2B7P	1134	0	0	*	50	187	0	0	0	3082	4.04276	1	1	0	329	0	0	11500	5.94245	1	1	0	0	0	0	0	0	0	0	0	0	0	0	0	0	0	0	0	0	0	0	0	0	0	0	0
1559	BC020754	CYP2C9	CYP2C9	489	0	0	*	6353	3508	3382	-0.909561	0	11151	1.66845	1	1	0	0	0	0	9616	1.45479	0	0	0	0	0	0	6806	0.956158	0	0	0	0	0	0	184	0	0	0	0	0	0	0	28	0	0	0	0
29785	BC033691	CYP2S1	CYP2S1	1515	0	0	*	2180	2035	19	0	0	0	0	0	0	0	55	0	0	0	0	0	0	0	3735	0.77678	0	0	0	0	0	0	645	-1.75696	0	5055	1.31268	0	0	0	0	0	0	0	0	0	0	0
54905	BC025761	CYP2W1	CYP2W1	1305	0	0	*	118	4887	0	0	0	0	0	0	0	0	0	0	0	849	-2.52511	0	0	0	0	0	0	4062	-0.266759	0	0	0	249	0	0	0	0	0	0	0	0	0	0	1066	-2.19674	0	0	0
1577	BC033862	CYP3A5	CYP3A5	1509	0	0	*	1736	1024	0	0	0	0	0	0	0	0	0	0	0	0	0	0	0	0	0	0	0	0	0	0	0	0	0	0	0	6	0	0	0	0	0	0	0	0	0	0	0	0
1579	BC022851	CYP4A11	CYP4A11	648	0	0	*	2481	3208	782	-1.66568	0	0	0	0	0	0	1425	-0.79996	0	0	0	0	0	0	838	-1.5659	0	0	0	0	0	0	6436	1.37524	0	0	0	0	0	0	0	0	0	0	0	0	0	0
1580	BC017758	CYP4B1	CYP4B1	1539	0	0	*	2101	1311	0	0	0	0	0	0	0	0	0	0	0	0	0	0	0	0	0	0	0	0	0	0	0	0	0	0	0	0	0	0	0	0	0	0	0	0	0	0	0	0
66002	BC035350	CYP4F12	CYP4F12	1575	0	0	*	53	337	0	0	0	0	0	0	0	0	0	0	0	834	1.3073	0	0	0	0	0	0	0	0	0	0	0	0	0	0	0	0	0	0	0	0	0	0	0	0	0	0	0
285440	BC060857	CYP4V2	CYP4V2	1578	0	0	*	2522	2587	1076	-1.22889	0	163	-3.98834	0	0	0	164	0	0	7702	1.57395	1	1	0	1982	-0.347611	0	1883	-0.458247	0	0	0	12	0	0	2107	-0.29609	0	0	0	4569	0.85731	0	0	0	0	0	0
84418	BC023982	ORF1-FL49	CYSTM1	294	0	0	*	1527	4316	4810	1.65534	1	0	0	0	1	0	0	0	0	0	0	0	0	0	2554	0.742058	0	0	0	0	0	0	6591	2.1098	1	1735	-1.31476	0	1	0	7151	2.22744	1	0	0	0	1	0
9266	BC004361	PSCD2	CYTH2	1203	0	0	*	1610	3002	0	0	0	2149	-0.482258	0	0	0	0	0	0	0	0	0	0	0	0	0	0	0	0	0	0	0	0	0	0	3373	0.168108	0	0	0	0	0	0	222	0	0	0	0
9265	BC028717	PSCD3	CYTH3	1200	0	0	*	1509	677	0	0	0	0	0	0	0	0	3452	1.19384	0	0	0	0	0	0	0	0	0	0	0	0	0	0	0	0	0	0	0	0	0	0	0	0	0	0	0	0	0	0
27128	BC017780	PSCD4	CYTH4	357	0	0	*	5734	7144	4396	-0.383351	0	18	0	0	0	0	0	0	0	324	0	0	0	0	904	-2.66515	0	15293	1.09807	0	0	0	5036	-0.187264	0	0	0	0	0	0	3	0	0	21972	1.62086	1	1	0
54360	BC031391	CYTL1	CYTL1	411	1	0	Unknown	522	3907	0	0	0	1390	-1.49098	0	0	0	0	0	0	0	0	0	0	0	208	0	0	284	0	0	0	0	12	0	0	2199	-0.829214	0	0	0	0	0	0	3240	-0.270067	0	0	0
3105	BC003069	HLA-A	HLA-A	1098	0	0	*	3931	1781	0	0	0	0	0	0	0	0	55	0	0	5649	1.66531	1	1	0	0	0	0	5742	1.68887	1	1	0	0	0	0	0	0	0	0	0	2648	-0.569993	0	0	0	0	0	0
3151	BC014644	HMGN2	HMGN2	273	1	1	NA	2219	431	4911	1.14611	0	1014	1.2343	0	0	0	12438	2.48677	1	710	0.720131	0	1	0	2290	0.0454379	0	1675	1.9584	1	1	0	422	0	0	5284	3.61587	1	1	0	55	0	0	457	0	0	0	0
54987	BC010908	C1orf123	CZIB	483	0	0	*	9370	10642	2998	-1.64405	0	2298	-2.21132	0	0	0	17863	0.930853	0	834	-3.67358	0	0	0	840	-3.47959	0	19736	0.89106	0	0	0	0	0	0	13027	0.291736	0	0	0	12438	0.408634	0	10591	-0.00693049	0	0	0
3227	BC001543	HOXC11	HOXC11	915	1	1	Homeodomain	234	1264	0	0	0	0	0	0	0	0	12329	5.7194	1	0	0	0	1	0	0	0	0	4890	1.95184	1	1	0	0	0	0	486	0	0	0	0	0	0	0	111	0	0	0	0
375519	BC057813	GJB7	GJB7	672	0	0	*	50	50	0	0	0	0	0	0	0	0	0	0	0	0	0	0	0	0	0	0	0	0	0	0	0	0	0	0	0	0	0	0	0	0	0	0	0	831	4.05485	1	1	0
3263	BC005395	HPX	HPX	765	0	0	*	3510	3402	0	0	0	5714	0.748118	0	0	0	0	0	0	0	0	0	0	0	0	0	0	14403	2.08191	1	1	0	6837	0.961892	0	0	0	0	0	0	0	0	0	4901	0.526693	0	0	0
26353	BC002673	HSPB8	HSPB8	591	0	0	*	5244	424	0	0	0	1802	2.08746	1	1	0	8548	0.704919	0	0	0	0	0	0	0	0	0	7231	4.09206	1	1	0	1255	-2.06298	0	3764	3.15013	1	1	0	1270	-2.04584	0	0	0	0	0	0
1622	BC062996	DBI	DBI	315	0	0	*	2441	718	0	0	0	0	0	0	0	0	0	0	0	0	0	0	0	0	0	0	0	0	0	0	0	0	0	0	0	4119	2.52024	1	1	0	3	0	0	0	0	0	0	0
1627	BC007281	DBN1	DBN1	1950	0	0	*	110	144	0	0	0	0	0	0	0	0	0	0	0	0	0	0	0	0	0	0	0	0	0	0	0	0	5682	5.69082	1	0	0	0	1	0	0	0	0	0	0	0	0	0
79269	BC011959	WDR32	DCAF10	777	0	0	*	2016	1298	0	0	0	0	0	0	0	0	0	0	0	0	0	0	0	0	8	0	0	0	0	0	0	0	0	0	0	0	0	0	0	0	0	0	0	0	0	0	0	0
79953	BC030637	C20orf39	SYNDIG1	777	0	0	*	50	240	0	0	0	0	0	0	0	0	0	0	0	0	0	0	0	0	0	0	0	1372	2.51517	1	1	0	0	0	0	0	0	0	0	0	3	0	0	0	0	0	0	0
90379	BC013280	LOC90379	DCAF15	1311	0	0	*	1307	200	0	0	0	0	0	0	0	0	0	0	0	0	0	0	0	0	0	0	0	0	0	0	0	0	0	0	0	0	0	0	0	0	0	0	0	0	0	0	0	0
3364	BC007013	HUS1	HUS1	843	0	0	*	1537	334	0	0	0	0	0	0	0	0	0	0	0	0	0	0	0	0	0	0	0	8756	4.71235	1	1	0	0	0	0	0	0	0	0	0	0	0	0	0	0	0	0	0
22858	BC035807	ICK	ICK	879	0	0	*	761	1442	77	0	0	0	0	0	0	0	0	0	0	0	0	0	0	0	0	0	0	4859	1.75259	1	1	0	0	0	0	0	0	0	0	0	0	0	0	0	0	0	0	0
10072	BC001446	DPP3	DPP3	2214	0	0	*	50	637	0	0	0	0	0	0	0	0	0	0	0	0	0	0	0	0	0	0	0	0	0	0	0	0	0	0	0	0	0	0	0	0	0	0	0	0	0	0	0	0
79877	BC033299	FLJ22955	DCAKD	696	0	0	*	51	1979	0	0	0	0	0	0	0	0	0	0	0	0	0	0	0	0	0	0	0	0	0	0	0	0	0	0	0	0	0	0	0	0	0	0	0	0	0	0	0	0
117159	BC062682	DCD	DCD	333	0	0	*	2869	2887	9871	1.78265	1	0	0	0	1	0	7342	1.35563	0	0	0	0	0	0	0	0	0	0	0	0	0	0	15	0	0	0	0	0	0	0	0	0	0	0	0	0	0	0
64421	BC009185	DCLRE1C	DCLRE1C	1734	0	0	*	150	596	0	0	0	0	0	0	0	0	0	0	0	5773	3.27594	1	1	0	0	0	0	318	0	0	0	0	0	0	0	45	0	0	0	0	0	0	0	0	0	0	0	0
1634	BC005322	DCN	DCN	1080	0	0	*	2291	2300	0	0	0	0	0	0	0	0	0	0	0	0	0	0	0	0	0	0	0	0	0	0	0	0	0	0	0	310	0	0	0	0	0	0	0	0	0	0	0	0
81614	BC011775	NIPA2	NIPA2	1083	0	0	*	68	2016	107	0	0	0	0	0	0	0	0	0	0	1096	-0.879248	0	0	0	425	0	0	5807	1.5263	1	1	0	0	0	0	713	-1.49952	0	0	0	0	0	0	69	0	0	0	0
1638	BC028311	DCT	DCT	1560	0	0	*	1173	1005	296	0	0	0	0	0	0	0	0	0	0	0	0	0	0	0	0	0	0	1898	0.917284	0	0	0	1628	0.472898	0	0	0	0	0	0	0	0	0	0	0	0	0	0
1635	BC001286	DCTD	DCTD	537	0	0	*	1137	1651	0	0	0	0	0	0	0	0	0	0	0	0	0	0	0	0	0	0	0	0	0	0	0	0	0	0	0	559	-1.56242	0	0	0	0	0	0	12267	2.89337	1	1	0
11258	BC000319	DCTN3	DCTN3	531	0	0	*	50	808	0	0	0	0	0	0	0	0	0	0	0	8135	3.33172	1	1	0	0	0	0	0	0	0	0	0	0	0	0	0	0	0	0	0	0	0	0	0	0	0	0	0
51164	BC026323	DCTN4	DCTN4	1383	0	0	*	50	122	0	0	0	0	0	0	0	0	0	0	0	0	0	0	0	0	0	0	0	0	0	0	0	0	0	0	0	1883	3.94808	1	1	0	0	0	0	0	0	0	0	0
79077	BC001344	XTP3TPA	DCTPP1	513	0	0	*	2278	2590	0	0	0	0	0	0	0	0	0	0	0	0	0	0	0	0	0	0	0	4211	0.701211	0	0	0	2124	-0.100984	0	0	0	0	0	0	0	0	0	2603	0.00722321	0	0	0
54165	BC009478	DCUN1D1	DCUN1D1	780	0	0	*	7097	8067	0	0	0	0	0	0	0	0	0	0	0	0	0	0	0	0	726	-3.28917	0	0	0	0	0	0	0	0	0	11052	0.454203	0	0	0	976	-2.86226	0	0	0	0	0	0
1641	BC027925	DCX	DCX	1083	0	0	*	50	384	0	0	0	7417	4.27166	1	1	0	0	0	0	6190	4.01076	1	1	0	0	0	0	0	0	0	0	0	0	0	0	0	0	0	0	0	0	0	0	0	0	0	0	0
51181	BC001470	DCXR	DCXR	735	0	0	*	1384	939	2853	1.04364	0	0	0	0	0	0	0	0	0	46	0	0	0	0	2521	0.865152	0	3	0	0	0	0	0	0	0	56	0	0	0	0	0	0	0	0	0	0	0	0
3423	BC006170	IDS	IDS	939	0	0	*	755	774	787	0.059887	0	0	0	0	0	0	0	0	0	0	0	0	0	0	105	0	0	2329	1.58931	1	1	0	648	-0.220483	0	134	0	0	0	0	0	0	0	0	0	0	0	0
3454	BC021825	IFNAR1	IFNAR1	1674	0	0	*	478	334	0	0	0	0	0	0	0	0	0	0	0	0	0	0	0	0	0	0	0	2769	3.05145	1	1	0	0	0	0	0	0	0	0	0	0	0	0	0	0	0	0	0
55924	BC031558	C1orf183	INKA2	894	0	0	*	3306	2472	382	0	0	3880	0.650378	0	0	0	0	0	0	0	0	0	0	0	3339	0.0143294	0	8462	1.77532	1	1	0	0	0	0	7307	1.5636	1	1	0	0	0	0	0	0	0	0	0
1650	BC002594	DDOST	DDOST	1371	0	0	*	3908	5215	2445	-0.676596	0	0	0	0	0	0	0	0	0	0	0	0	0	0	468	0	0	0	0	0	0	0	0	0	0	374	0	0	0	0	0	0	0	6881	0.399951	0	0	0
1653	BC012739	DDX1	DDX1	2094	0	0	*	2051	815	0	0	0	0	0	0	0	0	0	0	0	1791	1.13589	0	0	0	4120	1.00632	0	0	0	0	0	0	1525	-0.427518	0	0	0	0	0	0	4888	1.25292	0	0	0	0	0	0
11269	BC010008	DDX19B	DDX19B	1113	0	0	*	503	646	0	0	0	0	0	0	0	0	0	0	0	0	0	0	0	0	0	0	0	0	0	0	0	0	0	0	0	7274	3.49314	1	1	0	0	0	0	0	0	0	0	0
51763	BC004362	SKIP	INPP5K	1347	0	0	*	3400	3676	5061	0.573888	0	5171	0.492307	0	0	0	0	0	0	0	0	0	0	0	0	0	0	16845	2.19611	1	1	0	0	0	0	5871	0.675469	0	0	0	0	0	0	1121	-1.71335	0	0	0
10212	BC010455	DDX39	DDX39A	951	0	0	*	1598	1089	0	0	0	0	0	0	0	0	0	0	0	0	0	0	0	0	0	0	0	0	0	0	0	0	0	0	0	0	0	0	0	0	316	0	0	0	0	0	0	0
1907	BC034393	EDN2	EDN2	537	0	0	*	50	3932	0	0	0	0	0	0	0	0	0	0	0	0	0	0	0	0	0	0	0	7154	0.863487	0	0	0	0	0	0	3387	-0.215255	0	0	0	0	0	0	0	0	0	0	0
83479	BC041801	DDX59	DDX59	1860	0	0	*	325	696	0	0	0	0	0	0	0	0	0	0	0	0	0	0	0	0	1	0	0	0	0	0	0	0	0	0	0	0	0	0	0	0	0	0	0	0	0	0	0	0
55601	BC020601	FLJ20035	DDX60	552	0	0	*	2168	2899	0	0	0	0	0	0	0	0	0	0	0	0	0	0	0	0	0	0	0	0	0	0	0	0	0	0	0	0	0	0	0	0	0	0	0	0	0	0	0	0
26063	BC010740	DECR2	DECR2	879	0	0	*	5692	4990	17940	1.65617	1	2618	-0.930575	0	1	0	7507	0.399301	0	0	0	0	0	0	777	-2.87295	0	691	-2.85228	0	0	0	0	0	0	0	0	0	0	0	0	0	0	0	0	0	0	0
162989	BC027930	DEDD2	DEDD2	981	1	0	NA	4612	3015	0	0	0	816	-1.88552	0	0	0	6137	0.412141	0	0	0	0	0	0	3028	-0.607027	0	7328	1.28126	0	0	0	7110	0.624457	0	5024	0.736678	0	0	0	5551	0.267355	0	138	0	0	0	0
50619	BC017504	DEF6	DEF6	1011	0	0	*	1047	590	0	0	0	0	0	0	0	0	0	0	0	309	0	0	0	0	0	0	0	0	0	0	0	0	0	0	0	0	0	0	0	0	0	0	0	0	0	0	0	0
54849	BC015482	FLJ20186	DEF8	594	0	0	*	4962	6495	0	0	0	0	0	0	0	0	1096	-2.17867	0	14618	1.17034	0	0	0	4659	-0.0909014	0	0	0	0	0	0	12144	1.29125	0	14668	1.17527	0	0	0	25	0	0	0	0	0	0	0
1667	BC069423	DEFA1	DEFA1	285	0	0	*	6386	4291	625	-3.35298	0	4	0	0	0	0	10685	0.742602	0	340	0	0	0	0	0	0	0	0	0	0	0	0	12105	0.922619	0	145	0	0	0	0	14356	1.16867	0	28	0	0	0	0
1670	BC069690	DEFA5	DEFA5	285	0	0	*	5474	8461	9252	0.75717	0	19926	1.23575	0	0	0	110	0	0	7409	-0.191549	0	0	0	5993	0.130683	0	4853	-0.801951	0	0	0	141	0	0	17445	1.04391	0	0	0	172	0	0	235	0	0	0	0
1671	BC069667	DEFA6	DEFA6	303	0	0	*	921	808	0	0	0	0	0	0	0	0	0	0	0	0	0	0	0	0	0	0	0	0	0	0	0	0	0	0	0	0	0	0	0	0	0	0	0	2201	1.44573	0	0	0
164684	BC022549	MGC26816	WBP2NL	603	0	0	*	50	1457	0	0	0	0	0	0	0	0	0	0	0	0	0	0	0	0	0	0	0	7105	2.28583	1	1	0	0	0	0	0	0	0	0	0	0	0	0	0	0	0	0	0
245932	BC062212	DEFB119	DEFB119	255	0	0	*	50	487	0	0	0	0	0	0	0	0	0	0	0	0	0	0	0	0	0	0	0	0	0	0	0	0	0	0	0	0	0	0	0	0	3	0	0	0	0	0	0	0
1673	BC069285	DEFB4	DEFB4A	195	0	0	*	2850	2681	0	0	0	6374	1.24943	0	0	0	0	0	0	123	0	0	0	0	5318	0.899922	0	0	0	0	0	0	11809	2.05085	1	0	0	0	1	0	0	0	0	5912	1.14088	0	0	0
8560	BC000961	DEGS1	DEGS1	972	0	0	*	2016	515	0	0	0	0	0	0	0	0	0	0	0	0	0	0	0	0	0	0	0	0	0	0	0	0	0	0	0	0	0	0	0	0	11	0	0	0	0	0	0	0
57706	BC039703	DENND1A	DENND1A	1680	0	0	*	1956	2678	0	0	0	0	0	0	0	0	0	0	0	0	0	0	0	0	0	0	0	0	0	0	0	0	0	0	0	0	0	0	0	0	0	0	0	2271	-0.237828	0	0	0
163486	BC063877	DENND1B	DENND1B	1281	0	0	*	1501	281	184	0	0	0	0	0	0	0	0	0	0	0	0	0	0	0	0	0	0	0	0	0	0	0	0	0	0	0	0	0	0	0	0	0	0	0	0	0	0	0
8562	BC007860	DENR	DENR	597	0	0	*	2689	733	0	0	0	0	0	0	0	0	0	0	0	0	0	0	0	0	0	0	0	0	0	0	0	0	0	0	0	0	0	0	0	0	0	0	0	3932	2.42338	1	1	0
11067	BC011402	C10orf10	DEPP1	639	0	0	*	2881	708	0	0	0	0	0	0	0	0	0	0	0	0	0	0	0	0	0	0	0	0	0	0	0	0	0	0	0	0	0	0	0	0	0	0	0	0	0	0	0	0
79139	BC002457	DERL1	DERL1	756	0	0	*	18230	16566	123	0	0	6806	-1.28335	0	0	0	0	0	0	0	0	0	0	0	7564	-1.26909	0	8612	-0.943805	0	0	0	6048	-1.59178	0	2769	-2.58079	0	0	0	2676	-2.76816	0	2312	-2.84101	0	0	0
51009	BC010890	DERL2	DERL2	720	0	0	*	1718	1585	347	0	0	0	0	0	0	0	0	0	0	0	0	0	0	0	545	-1.6564	0	0	0	0	0	0	0	0	0	0	0	0	0	0	0	0	0	0	0	0	0	0
91319	BC057830	DERL3	DERL3	708	0	0	*	4309	2228	0	0	0	14819	2.73363	1	1	0	0	0	0	0	0	0	0	0	0	0	0	0	0	0	0	0	0	0	0	0	0	0	0	0	3	0	0	0	0	0	0	0
159989	BC050325	FLJ25393	DEUP1	1071	0	0	*	351	1985	0	0	0	0	0	0	0	0	2027	2.5298	1	5186	1.38548	0	1	0	0	0	0	3	0	0	0	0	5825	4.05272	1	5248	1.40263	0	1	0	0	0	0	0	0	0	0	0
28955	BC001083	DEXI	DEXI	288	0	0	*	452	396	0	0	0	0	0	0	0	0	0	0	0	355	0	0	0	0	0	0	0	0	0	0	0	0	0	0	0	0	0	0	0	0	0	0	0	0	0	0	0	0
1676	BC007721	DFFA	DFFA	996	0	0	*	50	2178	0	0	0	1415	-0.622202	0	0	0	0	0	0	0	0	0	0	0	59	0	0	0	0	0	0	0	0	0	0	0	0	0	0	0	0	0	0	0	0	0	0	0
84649	BC015234	DGAT2	DGAT2	1167	0	0	*	1614	708	0	0	0	0	0	0	0	0	0	0	0	0	0	0	0	0	0	0	0	0	0	0	0	0	0	0	0	5809	3.03647	1	1	0	0	0	0	0	0	0	0	0
5620	BC005303	PRM2	PRM2	309	0	0	*	50	715	0	0	0	0	0	0	0	0	11014	7.78319	1	1327	0.892153	0	1	7.78319	0	0	0	6662	3.21994	1	1	0	0	0	0	2509	1.8111	1	1	0	0	0	0	0	0	0	0	0
85359	BC000682	DGCR6L	DGCR6L	663	0	0	*	2007	2325	0	0	0	0	0	0	0	0	0	0	0	0	0	0	0	0	0	0	0	0	0	0	0	0	0	0	0	0	0	0	0	0	0	0	0	0	0	0	0	0
9445	BC016148	ITM2B	ITM2B	801	0	0	*	1281	247	5354	2.06335	1	0	0	0	1	0	0	0	0	0	0	0	0	0	566	-1.1784	0	6650	4.75077	1	1	0	246	0	0	198	0	0	0	0	0	0	0	0	0	0	0	0
3704	BC010138	ITPA	ITPA	585	0	0	*	2776	4116	0	0	0	13574	1.72153	1	1	0	0	0	0	0	0	0	0	0	0	0	0	13777	1.74295	1	1	0	0	0	0	0	0	0	0	0	0	0	0	0	0	0	0	0
1717	BC000054	DHCR7	DHCR7	1428	0	0	*	436	72	0	0	0	0	0	0	0	0	0	0	0	0	0	0	0	0	0	0	0	0	0	0	0	0	0	0	0	0	0	0	0	0	0	0	0	0	0	0	0	0
79947	BC003643	DHDDS	DHDDS	1002	0	0	*	2644	8904	12356	2.22442	1	0	0	0	1	0	12767	2.27163	1	0	0	0	1	0	2837	0.101644	0	1311	-2.76379	0	0	0	167	0	0	8894	-0.00162119	0	0	0	5578	1.07703	0	0	0	0	0	0
27294	BC032730	DHDH	DHDH	1005	0	0	*	4700	4806	1313	-1.83979	0	0	0	0	0	0	0	0	0	12950	1.43004	0	0	0	41	0	0	7833	0.704728	0	0	0	0	0	0	0	0	0	0	0	0	0	0	0	0	0	0	0
1719	BC000192	DHFR	DHFR	564	0	0	*	1771	147	0	0	0	8779	5.90017	1	1	0	0	0	0	0	0	0	0	0	0	0	0	0	0	0	0	0	0	0	0	3663	4.63914	1	1	0	0	0	0	0	0	0	0	0
1725	BC000333	DHPS	DHPS	1110	0	0	*	5141	1501	0	0	0	0	0	0	0	0	0	0	0	7841	2.38511	1	1	0	0	0	0	3056	1.02572	0	0	0	0	0	0	0	0	0	0	0	932	-2.46365	0	0	0	0	0	0
115817	BC015943	DHRS1	DHRS1	942	0	0	*	5358	3839	5854	0.127728	0	9311	1.27821	0	0	0	0	0	0	371	0	0	0	0	1438	-1.89763	0	0	0	0	0	0	4089	-0.389947	0	95	0	0	0	0	0	0	0	0	0	0	0	0
79758	BC009825	FLJ13639	DHRS12	816	0	0	*	1761	1414	8107	2.20277	1	0	0	0	1	0	0	0	0	0	0	0	0	0	0	0	0	21	0	0	0	0	0	0	0	0	0	0	0	0	0	0	0	0	0	0	0	0
147015	BC015582	MGC23280	DHRS13	984	0	0	*	1067	471	0	0	0	0	0	0	0	0	0	0	0	0	0	0	0	0	0	0	0	0	0	0	0	0	0	0	0	0	0	0	0	0	0	0	0	0	0	0	0	0
10202	BC002786	DHRS2	DHRS2	903	0	0	*	1426	446	0	0	0	0	0	0	0	0	0	0	0	0	0	0	0	0	0	0	0	0	0	0	0	0	0	0	0	693	0.635812	0	0	0	0	0	0	0	0	0	0	0
389434	BC056253	C6orf71	IYD	870	0	0	*	376	1320	0	0	0	0	0	0	0	0	0	0	0	0	0	0	0	0	0	0	0	7478	2.50211	1	1	0	0	0	0	0	0	0	0	0	0	0	0	0	0	0	0	0
317749	BC000663	DHRS4L2	DHRS4L2	693	0	0	*	622	830	0	0	0	422	-0.975868	0	0	0	0	0	0	0	0	0	0	0	0	0	0	1024	0.303032	0	0	0	487	0	0	0	0	0	0	0	0	0	0	1814	1.12799	0	0	0
51635	BC000637	DHRS7	DHRS7	1020	0	0	*	142	66	0	0	0	0	0	0	0	0	0	0	0	0	0	0	0	0	56	0	0	0	0	0	0	0	217	0	0	151	0	0	0	0	0	0	0	69	0	0	0	0
126306	BC021201	FLJ32416	JSRP1	996	0	0	*	899	375	2093	1.21918	0	0	0	0	0	0	4110	2.19275	1	834	1.15316	0	1	0	223	0	0	1192	1.66842	1	1	0	1789	0.99276	0	573	0.611645	0	0	0	180	0	0	42	0	0	0	0
207063	BC032340	DHRSX	DHRSX	993	0	0	*	1709	1520	0	0	0	0	0	0	0	0	0	0	0	0	0	0	0	0	0	0	0	3609	1.24753	0	0	0	0	0	0	0	0	0	0	0	0	0	0	0	0	0	0	0
22907	BC014237	DHX30	DHX30	1506	0	0	*	1887	471	0	0	0	0	0	0	0	0	0	0	0	2840	2.59209	1	1	0	0	0	0	0	0	0	0	0	12	0	0	469	0	0	0	0	0	0	0	194	0	0	0	0
56919	BC042040	DHX33	DHX33	1452	0	0	*	779	109	0	0	0	0	0	0	0	0	0	0	0	0	0	0	0	0	0	0	0	0	0	0	0	0	0	0	0	0	0	0	0	0	0	0	0	0	0	0	0	0
79132	BC014949	LGP2	DHX58	2037	0	0	*	929	499	0	0	0	0	0	0	0	0	0	0	0	0	0	0	0	0	0	0	0	0	0	0	0	0	0	0	0	0	0	0	0	0	0	0	0	0	0	0	0	0
56616	BC011909	DIABLO	DIABLO	720	0	0	*	1175	584	0	0	0	0	0	0	0	0	0	0	0	0	0	0	0	0	0	0	0	0	0	0	0	0	0	0	0	0	0	0	0	0	0	0	0	0	0	0	0	0
81624	BC048963	DIAPH3	DIAPH3	2550	0	0	*	1254	468	0	0	0	0	0	0	0	0	0	0	0	0	0	0	0	0	0	0	0	0	0	0	0	0	0	0	0	0	0	0	0	0	0	0	0	0	0	0	0	0
23254	BC035501	KIAA1026	KAZN	984	0	0	*	52	147	0	0	0	4097	4.80068	1	1	0	0	0	0	0	0	0	0	0	0	0	0	1461	3.31307	1	1	0	0	0	0	3747	4.67185	1	1	0	42	0	0	0	0	0	0	0
27292	BC002841	HSA9761	DIMT1	828	0	0	*	966	178	0	0	0	103	-0.789233	0	0	0	0	0	0	0	0	0	0	0	0	0	0	67	0	0	0	0	0	0	0	360	0	0	0	0	0	0	0	0	0	0	0	0
5634	BC040483	PRPS2	PRPS2	957	0	0	*	50	197	0	0	0	0	0	0	0	0	0	0	0	0	0	0	0	0	0	0	0	2705	3.77936	1	1	0	0	0	0	0	0	0	0	0	5839	6.86765	1	0	0	0	1	6.86765
205428	BC037293	MGC33365	DIPK2A	1293	0	0	*	6469	6441	659	-3.29519	0	11	0	0	0	0	0	0	0	1914	-1.75069	0	0	0	838	-2.94852	0	2497	-1.36709	0	0	0	2936	-1.13969	0	2406	-1.42065	0	0	0	0	0	0	651	-3.30656	0	0	0
9077	BC005362	DIRAS3	DIRAS3	690	0	0	*	50	509	0	0	0	3405	2.74192	1	1	0	0	0	0	0	0	0	0	0	226	0	0	0	0	0	0	0	0	0	0	0	0	0	0	0	0	0	0	0	0	0	0	0
1736	BC010015	DKC1	DKC1	1545	0	0	*	2398	1545	774	-1.63143	0	14	0	0	0	0	6027	1.32961	0	0	0	0	0	0	0	0	0	0	0	0	0	0	0	0	0	0	0	0	0	0	0	0	0	0	0	0	0	0
27122	BC007660	DKK3	DKK3	1053	0	0	*	1299	1067	3006	1.21044	0	301	-1.82572	0	0	0	0	0	0	0	0	0	0	0	0	0	0	0	0	0	0	0	695	-0.902317	0	0	0	0	0	0	0	0	0	3115	1.54567	1	1	0
10301	BC020692	DLEU1	DLEU1	237	0	0	*	182	243	0	0	0	0	0	0	0	0	0	0	0	2686	3.46643	1	1	0	0	0	0	0	0	0	0	0	0	0	0	0	0	0	0	0	0	0	0	0	0	0	0	0
8788	BC007741	DLK1	DLK1	1152	0	0	*	6620	5920	5045	-0.391977	0	0	0	0	0	0	0	0	0	0	0	0	0	0	0	0	0	0	0	0	0	0	0	0	0	0	0	0	0	0	0	0	0	0	0	0	0	0
3742	BC069355	KCNA6	KCNA6	1590	0	0	*	309	197	0	0	0	621	1.6564	1	1	0	0	0	0	2995	3.92629	1	1	0	0	0	0	1073	2.44538	1	1	0	0	0	0	120	0	0	0	0	0	0	0	0	0	0	0	0
10008	BC032235	KCNE3	KCNE3	312	0	0	*	2199	5299	160	0	0	3072	-0.786542	0	0	0	0	0	0	8042	0.601834	0	0	0	0	0	0	15433	1.54223	1	1	0	3194	0.538517	0	7187	0.43967	0	0	0	0	0	0	8099	0.612024	0	0	0
253980	BC036228	KCTD13	KCTD13	990	0	0	*	848	683	1207	0.50929	0	0	0	0	0	0	0	0	0	0	0	0	0	0	59	0	0	3426	2.32657	1	1	0	0	0	0	0	0	0	0	0	0	0	0	2506	1.87543	1	1	0
27013	BC012821	C2orf24	CNPPD1	1233	0	0	*	50	896	2328	5.54102	1	0	0	0	1	0	1151	4.52482	1	5001	2.48065	1	2	4.52482	0	0	0	8138	3.1831	1	1	0	26	0	0	0	0	0	0	0	0	0	0	0	0	0	0	0
26153	BC009415	KIF26A	KIF26A	612	0	0	*	456	147	0	0	0	0	0	0	0	0	0	0	0	0	0	0	0	0	0	0	0	1406	3.25771	1	1	0	463	0	0	0	0	0	0	0	0	0	0	0	0	0	0	0
90871	BC009510	C9orf123	DMAC1	351	0	0	*	327	356	0	0	0	0	0	0	0	0	0	0	0	0	0	0	0	0	1	0	0	0	0	0	0	0	0	0	0	0	0	0	0	0	0	0	0	0	0	0	0	0
55554	BC069507	KLK15	KLK15	771	0	0	*	1949	3501	99	0	0	7874	1.16933	0	0	0	0	0	0	0	0	0	0	0	0	0	0	13529	1.95022	1	1	0	0	0	0	1506	-1.21705	0	0	0	9962	2.3537	1	0	0	0	1	0
3817	BC005196	KLK2	KLK2	786	0	0	*	3641	1301	0	0	0	3508	1.43103	0	0	0	0	0	0	93	0	0	0	0	1257	-1.53435	0	9364	2.8475	1	1	0	188	0	0	0	0	0	0	0	3	0	0	7019	2.43164	1	1	0
1756	BC028720	DMD	DMD	1908	0	0	*	1298	1679	0	0	0	0	0	0	0	0	0	0	0	0	0	0	0	0	0	0	0	0	0	0	0	0	0	0	0	0	0	0	0	0	0	0	0	0	0	0	0	0
493861	BC027612	EID3	EID3	1002	0	0	*	50	1963	272	0	0	0	0	0	0	0	0	0	0	0	0	0	0	0	0	0	0	0	0	0	0	0	0	0	0	0	0	0	0	0	0	0	0	0	0	0	0	0
354	BC005307	KLK3	KLK3	786	0	0	*	4627	7038	7298	0.657424	0	0	0	0	0	0	4548	-0.0248448	0	0	0	0	0	0	2084	-1.15072	0	28376	2.01143	1	1	0	0	0	0	2876	-1.2911	0	0	0	0	0	0	0	0	0	0	0
388818	BC057825	LOC388818	KRTAP26-1	633	0	0	*	1909	1838	7028	1.8803	1	0	0	0	1	0	0	0	0	0	0	0	0	0	0	0	0	8040	2.12906	1	1	0	4819	1.33592	0	9660	2.39389	1	1	0	0	0	0	0	0	0	0	0
3846	BC069531	KRTAP5-9	KRTAP5-9	510	1	1	Unknown	1480	240	0	0	0	0	0	0	0	0	0	0	0	0	0	0	0	0	0	0	0	2341	3.28602	1	1	0	0	0	0	0	0	0	0	0	8	0	0	0	0	0	0	0
1762	BC019266	DMWD	DMWD	1005	0	0	*	2479	961	0	0	0	4973	2.37151	1	1	0	0	0	0	0	0	0	0	0	0	0	0	422	0	0	0	0	0	0	0	4854	2.33657	1	1	0	0	0	0	0	0	0	0	0
54919	BC010850	FLJ20397	DNAAF5	672	0	0	*	86	53	0	0	0	0	0	0	0	0	0	0	0	0	0	0	0	0	0	0	0	0	0	0	0	0	0	0	0	808	3.93029	1	1	0	0	0	0	0	0	0	0	0
79944	BC006117	L2HGDH	L2HGDH	1326	0	0	*	383	50	0	0	0	0	0	0	0	0	0	0	0	0	0	0	0	0	0	0	0	2353	5.55643	1	1	0	0	0	0	0	0	0	0	0	0	0	0	1011	4.33771	1	1	0
91133	BC039316	L3MBTL4	L3MBTL4	1605	1	1	C2H2 ZF	1283	69	2162	0.752845	0	0	0	0	0	0	1205	-0.090488	0	0	0	0	0	0	0	0	0	2671	5.27464	1	1	0	0	0	0	0	0	0	0	0	0	0	0	0	0	0	0	0
56891	BC022257	LGALS14	LGALS14	420	0	0	*	1852	765	0	0	0	0	0	0	0	0	0	0	0	0	0	0	0	0	0	0	0	2390	1.64348	1	1	0	0	0	0	0	0	0	0	0	1417	-0.386244	0	0	0	0	0	0
29094	BC062691	HSPC159	LGALSL	519	0	0	*	814	552	0	0	0	0	0	0	0	0	0	0	0	3380	2.61428	1	1	0	0	0	0	9877	4.16133	1	1	0	1690	1.05392	0	1115	1.0143	0	0	0	0	0	0	0	0	0	0	0
2873	BC064503	GPS1	GPS1	1584	0	0	*	50	50	0	0	0	0	0	0	0	0	8767	7.45401	1	0	0	0	1	7.45401	0	0	0	0	0	0	0	0	0	0	0	1461	4.86888	1	1	0	3554	6.15137	1	0	0	0	1	6.15137
25822	BC012115	DNAJB5	DNAJB5	1161	0	0	*	5068	1286	0	0	0	0	0	0	0	0	0	0	0	0	0	0	0	0	0	0	0	0	0	0	0	0	0	0	0	0	0	0	0	0	0	0	0	0	0	0	0	0
222662	BC028630	LHFPL5	LHFPL5	660	0	0	*	3231	624	13	0	0	0	0	0	0	0	1041	-1.63401	0	818	0.390555	0	0	0	356	0	0	2671	2.09776	1	1	0	0	0	0	0	0	0	0	0	0	0	0	678	0.119739	0	0	0
64215	BC030955	DNAJC1	DNAJC1	1023	1	0	Myb/SANT	1086	758	0	0	0	0	0	0	0	0	0	0	0	0	0	0	0	0	0	0	0	0	0	0	0	0	0	0	0	0	0	0	0	0	0	0	0	0	0	0	0	0
55735	BC006086	DNAJC11	DNAJC11	1680	0	0	*	1160	1058	0	0	0	0	0	0	0	0	0	0	0	0	0	0	0	0	0	0	0	0	0	0	0	0	16051	3.79047	1	0	0	0	1	0	0	0	0	0	0	0	0	0
56521	BC017018	DNAJC12	DNAJC12	597	0	0	*	2515	197	0	0	0	0	0	0	0	0	0	0	0	0	0	0	0	0	0	0	0	0	0	0	0	0	0	0	0	0	0	0	0	0	0	0	0	0	0	0	0	0
10186	BC017824	LHFP	LHFPL6	603	0	0	*	2359	936	0	0	0	20877	4.47926	1	1	0	438	0	0	6066	2.69617	1	1	0	1	0	0	7200	2.94342	1	1	0	0	0	0	22858	4.61005	1	1	0	0	0	0	9013	3.26743	1	1	0
132989	BC016746	MGC26744	C4orf36	354	0	0	*	1355	69	0	0	0	0	0	0	0	0	55	0	0	0	0	0	0	0	460	0	0	1192	4.11064	1	1	0	0	0	0	0	0	0	0	0	0	0	0	0	0	0	0	0
84791	BC005997	C1orf97	LINC00467	285	0	0	*	1166	846	6649	2.51157	1	0	0	0	1	0	0	0	0	0	0	0	0	0	0	0	0	5733	2.76056	1	1	0	0	0	0	0	0	0	0	0	0	0	0	0	0	0	0	0
7266	BC011837	DNAJC7	DNAJC7	1485	0	0	*	3526	1261	1919	-0.877678	0	0	0	0	0	0	0	0	0	6190	2.29537	1	1	0	0	0	0	0	0	0	0	0	0	0	0	0	0	0	0	0	0	0	0	0	0	0	0	0
83544	BC005343	C14orf168	DNAL1	456	0	0	*	4178	3108	160	0	0	2681	-0.213215	0	0	0	0	0	0	2840	-0.130096	0	0	0	1	0	0	0	0	0	0	0	3097	-0.431941	0	0	0	0	0	0	1511	-1.46731	0	0	0	0	0	0
285074	BC069048	LOC285074	LOC285074	297	0	0	*	218	409	0	0	0	0	0	0	0	0	0	0	0	2516	2.62096	1	1	0	11	0	0	5666	3.79216	1	1	0	0	0	0	0	0	0	0	0	0	0	0	0	0	0	0	0
1773	BC029437	DNASE1	DNASE1	849	0	0	*	1479	771	0	0	0	16025	4.37745	1	1	0	3397	1.19964	0	0	0	0	0	0	0	0	0	0	0	0	0	0	0	0	0	0	0	0	0	0	0	0	0	0	0	0	0	0
1774	BC001561	DNASE1L1	DNASE1L1	909	0	0	*	9123	9753	0	0	0	0	0	0	0	0	8493	-0.103234	0	5943	-0.714655	0	0	0	7386	-0.304715	0	0	0	0	0	0	16717	0.873736	0	0	0	0	0	0	0	0	0	125	0	0	0	0
1775	BC035205	DNASE1L2	DNASE1L2	900	0	0	*	1930	1957	2816	0.545046	0	0	0	0	0	0	0	0	0	0	0	0	0	0	0	0	0	0	0	0	0	0	3171	0.716337	0	0	0	0	0	0	0	0	0	0	0	0	0	0
1776	BC015831	DNASE1L3	DNASE1L3	918	0	0	*	5911	3617	0	0	0	7771	1.10331	0	0	0	0	0	0	0	0	0	0	0	349	0	0	0	0	0	0	0	701	-3.07592	0	134	0	0	0	0	0	0	0	12350	1.77165	1	1	0
23549	BC000653	DNPEP	DNPEP	1428	0	0	*	406	2906	0	0	0	0	0	0	0	0	0	0	0	0	0	0	0	0	1101	1.43926	0	5972	1.03918	0	0	0	0	0	0	5396	0.892856	0	0	0	0	0	0	0	0	0	0	0
10591	BC011683	C6orf108	DNPH1	525	0	0	*	1124	662	7880	2.80955	1	0	0	0	1	0	0	0	0	324	0	0	0	0	56	0	0	0	0	0	0	0	1182	0.072588	0	0	0	0	0	0	0	0	0	0	0	0	0	0
80005	BC011877	DOCK5	DOCK5	1053	0	0	*	450	559	0	0	0	0	0	0	0	0	0	0	0	0	0	0	0	0	0	0	0	0	0	0	0	0	3130	2.79817	1	0	0	0	1	0	25	0	0	0	0	0	0	0
727751	BC065260	LOC727751	LOC727751	261	0	0	*	2638	144	0	0	0	0	0	0	0	0	0	0	0	0	0	0	0	0	0	0	0	578	2.005	1	1	0	0	0	0	824	2.51658	1	1	0	0	0	0	0	0	0	0	0
9046	BC032623	DOK2	DOK2	1239	0	0	*	3266	2790	0	0	0	0	0	0	0	0	0	0	0	170	0	0	0	0	104	0	0	0	0	0	0	0	505	-2.69317	0	0	0	0	0	0	0	0	0	0	0	0	0	0
55122	BC000764	C6orf166	AKIRIN2	612	0	0	*	50	50	0	0	0	0	0	0	0	0	0	0	0	0	0	0	0	0	0	0	0	3646	6.18824	1	1	6.18824	6914	7.11145	1	0	0	0	1	7.11145	0	0	0	0	0	0	0	0
10489	BC004953	LRRC41	LRRC41	1695	0	0	*	994	715	1169	0.233957	0	0	0	0	0	0	0	0	0	0	0	0	0	0	1509	0.602275	0	2032	1.50689	1	1	0	1030	0.0513266	0	0	0	0	0	0	0	0	0	0	0	0	0	0
4045	BC033803	LSAMP	LSAMP	1017	0	0	*	251	3545	0	0	0	0	0	0	0	0	0	0	0	7440	1.06952	0	0	0	0	0	0	16338	2.20437	1	1	0	0	0	0	5932	0.742733	0	0	0	0	0	0	69	0	0	0	0
1801	BC003099	DPH1	DPH1	1092	0	0	*	705	574	0	0	0	0	0	0	0	0	0	0	0	0	0	0	0	0	0	0	0	0	0	0	0	0	0	0	0	0	0	0	0	0	22	0	0	0	0	0	0	0
1802	BC016956	DPH2	DPH2	1470	0	0	*	1216	306	160	0	0	7342	4.58457	1	1	0	0	0	0	8644	4.8201	1	1	0	0	0	0	0	0	0	0	0	0	0	0	0	0	0	0	0	0	0	0	10204	5.05946	1	1	0
285381	BC010181	ZCSL2	DPH3	249	0	0	*	50	259	838	4.06695	1	0	0	0	1	0	0	0	0	0	0	0	0	0	0	0	0	0	0	0	0	0	0	0	0	0	0	0	0	0	0	0	0	0	0	0	0	0
51611	BC009620	DPH5	DPH5	141	0	0	*	3637	334	0	0	0	0	0	0	0	0	0	0	0	0	0	0	0	0	0	0	0	0	0	0	0	0	0	0	0	0	0	0	0	0	0	0	0	0	0	0	0	0
92715	BC017335	C9orf112	DPH7	1359	0	0	*	107	527	0	0	0	0	0	0	0	0	0	0	0	0	0	0	0	0	0	0	0	0	0	0	0	0	0	0	0	0	0	0	0	0	0	0	0	0	0	0	0	0
8818	BC015374	DPM2	DPM2	207	0	0	*	1256	2422	0	0	0	3990	0.72019	0	0	0	0	0	0	0	0	0	0	0	1909	0.603981	0	266	0	0	0	0	0	0	0	0	0	0	0	0	0	0	0	3240	0.419795	0	0	0
149986	BC054888	LSM14B	LSM14B	237	0	0	*	2463	1623	0	0	0	454	0	0	0	0	0	0	0	896	-0.857092	0	0	0	1402	-0.81293	0	9413	2.53599	1	1	0	4989	1.01833	0	1461	-0.151707	0	0	0	0	0	0	1551	-0.0654643	0	0	0
4047	BC035638	LSS	LSS	2199	0	0	*	2096	1152	1994	-0.0719733	0	862	-0.418381	0	0	0	0	0	0	0	0	0	0	0	2206	0.0737941	0	21130	4.19708	1	1	0	0	0	0	0	0	0	0	0	0	0	0	0	0	0	0	0
57151	BC054481	LYZL6	LYZL6	447	0	0	*	9412	6157	0	0	0	6626	0.105911	0	0	0	0	0	0	0	0	0	0	0	6884	-0.451254	0	22493	1.86918	1	1	0	0	0	0	7847	0.349914	0	0	0	4397	-1.09798	0	13956	1.18059	0	0	0
1806	BC008379	DPYD	DPYD	522	0	0	*	4577	3951	139	0	0	0	0	0	0	0	603	-2.92417	0	0	0	0	0	0	0	0	0	0	0	0	0	0	0	0	0	0	0	0	0	0	0	0	0	0	0	0	0	0
1807	BC034395	DPYS	DPYS	1560	0	0	*	826	306	0	0	0	0	0	0	0	0	0	0	0	0	0	0	0	0	0	0	0	0	0	0	0	0	0	0	0	0	0	0	0	0	0	0	0	0	0	0	0	0
1809	BC039006	DPYSL3	DPYSL3	1713	0	0	*	108	1607	0	0	0	7785	2.27633	1	1	0	0	0	0	9956	2.6312	1	1	0	362	0	0	3401	1.08159	0	0	0	0	0	0	7562	2.2344	1	1	0	0	0	0	2977	0.889489	0	0	0
151188	BC028741	ARL6IP6	ARL6IP6	681	0	0	*	2695	112	53	0	0	0	0	0	0	0	0	0	0	0	0	0	0	0	0	0	0	15241	7.08832	1	1	7.08832	0	0	0	0	0	0	0	0	0	0	0	0	0	0	0	0
55332	BC018435	FLJ11259	DRAM1	717	0	0	*	2050	4594	6091	1.57106	1	4639	0.014063	0	1	0	0	0	0	13846	1.59165	1	1	0	0	0	0	3019	-0.60568	0	0	0	915	-1.16378	0	4021	-0.192197	0	0	0	0	0	0	4334	-0.0840517	0	0	0
128338	BC047025	TMEM77	DRAM2	627	0	0	*	1274	971	0	0	0	0	0	0	0	0	0	0	0	0	0	0	0	0	0	0	0	0	0	0	0	0	1390	0.12572	0	0	0	0	0	0	0	0	0	0	0	0	0	0
84232	BC031273	MAF1	MAF1	771	1	0	NA	6360	3914	0	0	0	1987	-0.978052	0	0	0	0	0	0	4446	0.183864	0	0	0	0	0	0	21659	2.46825	1	1	0	0	0	0	0	0	0	0	0	0	0	0	3129	-0.322942	0	0	0
83450	BC047873	LRRC48	DRC3	1572	0	0	*	6002	6860	0	0	0	6927	0.0140221	0	0	0	0	0	0	77	0	0	0	0	871	-2.7847	0	413	0	0	0	0	6221	0.0517032	0	2065	-1.73207	0	0	0	0	0	0	125	0	0	0	0
1813	BC021195	DRD2	DRD2	1332	0	0	*	3224	1314	0	0	0	0	0	0	0	0	0	0	0	0	0	0	0	0	2956	-0.125205	0	1491	0.182315	0	0	0	0	0	0	0	0	0	0	0	0	0	0	0	0	0	0	0
4733	BC020803	DRG1	DRG1	1104	0	0	*	1893	253	0	0	0	1429	2.4978	1	1	0	0	0	0	895	1.82275	1	1	0	0	0	0	0	0	0	0	0	1590	-0.251648	0	7416	4.87343	1	1	0	0	0	0	360	0	0	0	0
256691	BC015417	MAMDC2	MAMDC2	699	0	0	*	50	1139	0	0	0	0	0	0	0	0	0	0	0	0	0	0	0	0	0	0	0	5360	2.23447	1	1	0	0	0	0	0	0	0	0	0	776	3.95606	1	0	0	0	1	0
5608	BC012009	MAP2K6	MAP2K6	1005	0	0	*	2043	515	4596	1.16969	0	0	0	0	0	0	12000	2.55427	1	0	0	0	1	0	0	0	0	10336	4.32696	1	1	0	0	0	0	14248	4.79004	1	1	0	0	0	0	28	0	0	0	0
25778	BC053627	RIPK5	DSTYK	2655	0	0	*	868	443	0	0	0	0	0	0	0	0	0	0	0	0	0	0	0	0	0	0	0	0	0	0	0	0	0	0	0	0	0	0	0	0	0	0	0	0	0	0	0	0
92675	BC045167	HARS2	DTD1	630	0	0	*	5859	4915	12826	1.13034	0	0	0	0	0	0	1151	-2.34777	0	0	0	0	0	0	667	-3.1349	0	0	0	0	0	0	2352	-1.31677	0	12399	1.33496	0	0	0	3	0	0	12433	1.33891	0	0	0
112487	BC010618	C14orf126	DTD2	507	0	0	*	4419	3399	0	0	0	0	0	0	0	0	0	0	0	0	0	0	0	0	0	0	0	0	0	0	0	0	0	0	0	0	0	0	0	0	0	0	0	0	0	0	0	0
1837	BC005300	DTNA	DTNA	1116	0	0	*	2064	1432	128	0	0	4	0	0	0	0	0	0	0	10681	2.89894	1	1	0	641	-1.68705	0	0	0	0	0	0	11900	2.52745	1	0	0	0	1	0	0	0	0	0	0	0	0	0
56986	BC018028	DTWD1	DTWD1	330	0	0	*	50	980	0	0	0	0	0	0	0	0	0	0	0	0	0	0	0	0	0	0	0	0	0	0	0	0	0	0	0	0	0	0	0	0	0	0	0	0	0	0	0	0
5598	BC009963	MAPK7	MAPK7	2451	1	1	NA	949	1579	1484	0.645011	0	6065	1.9415	1	1	0	0	0	0	0	0	0	0	0	0	0	0	8505	2.4293	1	1	0	557	-0.768731	0	0	0	0	0	0	0	0	0	7393	2.22715	1	1	0
1841	BC001827	DTYMK	DTYMK	639	0	0	*	291	1754	0	0	0	0	0	0	0	0	0	0	0	2871	0.710905	0	0	0	0	0	0	0	0	0	0	0	0	0	0	0	0	0	0	0	0	0	0	0	0	0	0	0
90527	BC029819	NIP	DUOXA1	1452	0	0	*	1981	2487	0	0	0	0	0	0	0	0	0	0	0	1791	-0.473641	0	0	0	0	0	0	0	0	0	0	0	0	0	0	0	0	0	0	0	0	0	0	0	0	0	0	0
64118	BC062566	DUS1L	DUS1L	1422	0	0	*	88	109	0	0	0	0	0	0	0	0	0	0	0	0	0	0	0	0	0	0	0	0	0	0	0	0	3171	5.17129	1	0	0	0	1	0	0	0	0	0	0	0	0	0
56931	BC004549	DUS3L	DUS3L	1227	1	0	CCCH ZF	2552	465	0	0	0	117	-1.99072	0	0	0	4329	0.762405	0	7208	3.9543	1	1	0	121	0	0	810	0.800691	0	0	0	2652	0.0554524	0	0	0	0	0	0	0	0	0	0	0	0	0	0
11221	BC063826	DUSP10	DUSP10	1449	0	0	*	799	50	0	0	0	0	0	0	0	0	0	0	0	0	0	0	0	0	0	0	0	0	0	0	0	0	0	0	0	0	0	0	0	0	0	0	0	0	0	0	0	0
11072	BC001894	DUSP14	DUSP14	597	0	0	*	7705	4038	37	0	0	0	0	0	0	0	0	0	0	3982	-0.0201477	0	0	0	0	0	0	382	0	0	0	0	1801	-2.097	0	0	0	0	0	0	0	0	0	42	0	0	0	0
142679	BC035000	DUSP19	DUSP19	654	0	0	*	653	559	0	0	0	0	0	0	0	0	0	0	0	5402	3.27257	1	1	0	0	0	0	0	0	0	0	0	0	0	0	0	0	0	0	0	0	0	0	0	0	0	0	0
56940	BC022847	DUSP22	DUSP22	555	0	0	*	12532	16038	5098	-1.29761	0	8151	-0.976445	0	0	0	15068	0.265871	0	6884	-1.22018	0	0	0	10680	-0.230705	0	0	0	0	0	0	5817	-1.10727	0	7142	-1.16709	0	0	0	16353	0.383939	0	13970	-0.199162	0	0	0
78986	BC001613	DUSP26	DUSP26	636	0	0	*	863	2378	0	0	0	28	0	0	0	0	0	0	0	3797	0.675111	0	0	0	0	0	0	2145	-0.148771	0	0	0	10566	3.61392	1	2124	-0.162965	0	1	0	0	0	0	152	0	0	0	0
1845	BC035701	DUSP3	DUSP3	435	0	0	*	4657	3112	6582	0.499125	0	0	0	0	0	0	1699	-1.45472	0	0	0	0	0	0	0	0	0	0	0	0	0	0	0	0	0	0	0	0	0	0	6058	0.379441	0	11353	1.86716	1	1	0
1854	BC033645	DUT	DUT	495	1	1	NA	151	371	0	0	0	0	0	0	0	0	0	0	0	0	0	0	0	0	0	0	0	0	0	0	0	0	9	0	0	0	0	0	0	0	0	0	0	0	0	0	0	0
1855	BC050454	DVL1	DVL1	1335	1	1	Unknown	1204	3211	0	0	0	3487	0.118964	0	0	0	0	0	0	0	0	0	0	0	1874	0.638286	0	0	0	0	0	0	0	0	0	0	0	0	0	0	0	0	0	9069	1.49792	0	0	0
1797	BC071651	DOM3Z	DXO	639	0	0	*	1226	1186	0	0	0	0	0	0	0	0	4219	1.78294	1	0	0	0	1	0	0	0	0	49	0	0	0	0	0	0	0	1227	0.0490312	0	0	0	0	0	0	0	0	0	0	0
143241	BC019250	DYDC1	DYDC1	534	0	0	*	1102	178	0	0	0	0	0	0	0	0	0	0	0	0	0	0	0	0	0	0	0	0	0	0	0	0	0	0	0	0	0	0	0	0	0	0	0	0	0	0	0	0
7337	BC009271	UBE3A	UBE3A	1758	1	0	NA	50	1598	0	0	0	27013	4.07931	1	1	0	10904	7.76871	1	0	0	0	1	7.76871	3	0	0	0	0	0	0	0	0	0	0	8101	2.34183	1	1	0	0	0	0	12571	2.97576	1	1	0
1780	BC032945	DNCI1	DYNC1I1	1887	0	0	*	510	1027	384	0	0	0	0	0	0	0	0	0	0	0	0	0	0	0	0	0	0	0	0	0	0	0	0	0	0	0	0	0	0	0	0	0	0	0	0	0	0	0
140735	BC010744	Dlc2	DYNLL2	270	0	0	*	50	268	0	0	0	0	0	0	0	0	0	0	0	0	0	0	0	0	0	0	0	0	0	0	0	0	0	0	0	0	0	0	0	0	0	0	0	0	0	0	0	0
22924	BC011557	MAPRE3	MAPRE3	846	0	0	*	2700	1005	0	0	0	2440	1.27969	0	0	0	0	0	0	1775	0.820624	0	0	0	1611	-0.745003	0	9935	3.30532	1	1	0	0	0	0	1255	0.320492	0	0	0	0	0	0	3157	1.65136	1	1	0
8445	BC006375	DYRK2	DYRK2	1806	0	0	*	1434	1258	0	0	0	8896	2.82202	1	1	0	0	0	0	77	0	0	0	0	0	0	0	3	0	0	0	0	0	0	0	3105	1.30346	0	0	0	3	0	0	0	0	0	0	0
8444	BC015501	DYRK3	DYRK3	1707	0	0	*	59	540	0	0	0	2039	1.91683	1	1	0	0	0	0	8520	3.97982	1	1	0	0	0	0	0	0	0	0	0	0	0	0	0	0	0	0	0	0	0	0	0	0	0	0	0
8798	BC031244	DYRK4	DYRK4	1563	0	0	*	825	799	507	-0.702408	0	153	-2.38466	0	0	0	0	0	0	0	0	0	0	0	1071	0.376492	0	0	0	0	0	0	6817	3.04667	1	0	0	0	1	0	0	0	0	0	0	0	0	0
55184	BC036231	C20orf12	DZANK1	744	0	0	*	1235	799	0	0	0	0	0	0	0	0	0	0	0	0	0	0	0	0	125	0	0	0	0	0	0	0	0	0	0	0	0	0	0	0	0	0	0	0	0	0	0	0
65108	BC066915	MARCKSL1	MARCKSL1	588	0	0	*	6445	459	5726	-0.170653	0	4607	3.32726	1	1	0	3562	-0.855493	0	3365	2.87404	1	1	0	4125	-0.643786	0	6968	3.92418	1	1	0	1965	-1.71365	0	5706	3.63591	1	1	0	0	0	0	5815	3.66321	1	1	0
55837	BC001245	C14orf11	EAPP	858	0	0	*	204	296	0	0	0	0	0	0	0	0	0	0	0	0	0	0	0	0	0	0	0	0	0	0	0	0	0	0	0	0	0	0	0	0	0	0	0	0	0	0	0	0
9166	BC005249	EBAG9	EBAG9	642	0	0	*	379	384	0	0	0	0	0	0	0	0	0	0	0	0	0	0	0	0	0	0	0	0	0	0	0	0	0	0	0	0	0	0	0	0	0	0	0	0	0	0	0	0
1879	BC038805	EBF	EBF1	1776	1	1	EBF1	1586	1579	165	0	0	0	0	0	0	0	12767	3.00895	1	0	0	0	1	0	51	0	0	0	0	0	0	0	0	0	0	6815	2.1097	1	1	0	1464	-0.115477	0	0	0	0	0	0
57593	BC054347	KIAA1442	EBF4	267	1	1	EBF1	53	172	0	0	0	0	0	0	0	0	0	0	0	0	0	0	0	0	0	0	0	0	0	0	0	0	0	0	0	0	0	0	0	0	341	0	0	0	0	0	0	0
10148	BC015364	EBI3	EBI3	690	0	0	*	4761	6560	0	0	0	4657	-0.494295	0	0	0	0	0	0	0	0	0	0	0	0	0	0	13236	1.0127	0	0	0	927	-2.36062	0	0	0	0	0	0	0	0	0	0	0	0	0	0
1891	BC017408	ECH1	ECH1	987	0	0	*	8740	9977	5085	-0.781386	0	13655	0.452751	0	0	0	0	0	0	13506	0.436922	0	0	0	2364	-1.8864	0	15763	0.659864	0	0	0	763	-3.51788	0	39	0	0	0	0	19	0	0	11048	0.147107	0	0	0
55862	BC003549	ECHDC1	ECHDC1	906	0	0	*	1051	3764	0	0	0	0	0	0	0	0	0	0	0	2516	-0.581135	0	0	0	0	0	0	0	0	0	0	0	0	0	0	6855	0.86489	0	0	0	0	0	0	928	-2.02007	0	0	0
1632	BC000762	DCI	ECI1	909	0	0	*	2372	1873	5747	1.27671	0	128	-3.87114	0	0	0	0	0	0	13306	2.82865	1	1	0	4657	0.973297	0	2469	0.398576	0	0	0	0	0	0	0	0	0	0	0	0	0	0	7366	1.97553	1	1	0
124401	BC050387	KIAA1977	ANKS3	1584	1	0	NA	110	1070	411	0	0	10921	3.35142	1	1	0	22520	7.67756	1	0	0	0	1	7.67756	26100	7.8904	1	0	0	0	1	7.8904	8448	6.26303	1	0	0	0	1	6.26303	21352	7.60072	1	0	0	0	1	7.60072
60401	BC034919	EDA2R	EDA2R	894	1	0	Unknown	2538	1897	0	0	0	0	0	0	0	0	0	0	0	0	0	0	0	0	0	0	0	2423	0.353075	0	0	0	0	0	0	3546	0.902473	0	0	0	0	0	0	872	-1.12132	0	0	0
80153	BC011534	FLJ21128	EDC3	1527	0	0	*	1966	796	0	0	0	0	0	0	0	0	0	0	0	3890	2.28893	1	1	0	0	0	0	0	0	0	0	0	0	0	0	4499	2.49876	1	1	0	6	0	0	12862	4.0142	1	1	0
64083	BC012123	GOLPH3	GOLPH3	897	0	0	*	50	712	0	0	0	0	0	0	0	0	6575	7.03892	1	0	0	0	1	7.03892	0	0	0	0	0	0	0	0	0	0	0	0	0	0	0	0	0	0	0	0	0	0	0	0
55741	BC001371	C20orf31	EDEM2	1737	0	0	*	365	331	0	0	0	0	0	0	0	0	3068	3.07133	1	0	0	0	1	0	0	0	0	657	0.989062	0	0	0	0	0	0	1903	2.52337	1	1	0	0	0	0	0	0	0	0	0
80267	BC016464	C1orf22	EDEM3	369	0	0	*	201	774	0	0	0	0	0	0	0	0	0	0	0	0	0	0	0	0	0	0	0	0	0	0	0	0	0	0	0	0	0	0	0	0	0	0	0	0	0	0	0	0
55784	BC025708	MCTP2	MCTP2	921	0	0	*	50	693	0	0	0	0	0	0	0	0	0	0	0	0	0	0	0	0	0	0	0	2148	1.63207	1	1	0	1276	4.67356	1	1112	0.68223	0	1	0	0	0	0	3032	2.12934	1	1	0
1906	BC009720	EDN1	EDN1	639	1	0	Unknown	1919	3090	0	0	0	60	-5.6865	0	0	0	0	0	0	0	0	0	0	0	95	0	0	0	0	0	0	0	0	0	0	14587	2.239	1	1	0	0	0	0	0	0	0	0	0
1908	BC008876	EDN3	EDN3	717	0	0	*	1397	699	1247	-0.163871	0	0	0	0	0	0	8712	2.64067	1	479	0	0	1	0	0	0	0	0	0	0	0	0	0	0	0	0	0	0	0	0	0	0	0	2284	1.7082	1	1	0
4190	BC001484	MDH1	MDH1	1005	0	0	*	1641	858	0	0	0	0	0	0	0	0	0	0	0	2732	1.67091	1	1	0	0	0	0	9669	3.49432	1	1	0	0	0	0	4504	2.39216	1	1	0	0	0	0	0	0	0	0	0
1915	BC010735	EEF1A1	EEF1A1	1389	1	1	NA	6242	5477	43	0	0	284	-4.26942	0	0	0	4055	-0.622306	0	5974	0.125311	0	0	0	2065	-1.59587	0	6506	0.248385	0	0	0	0	0	0	6916	0.336552	0	0	0	47	0	0	21114	1.94674	1	1	0
1917	BC000432	EEF1A2	EEF1A2	1392	0	0	*	510	983	0	0	0	0	0	0	0	0	0	0	0	0	0	0	0	0	1	0	0	171	0	0	0	0	0	0	0	0	0	0	0	0	0	0	0	0	0	0	0	0
221143	BC018091	LOC221143	EEF1AKMT1	645	0	0	*	264	471	12084	5.51642	1	0	0	0	1	0	0	0	0	0	0	0	0	0	7	0	0	911	0.951724	0	0	0	2781	3.39699	1	0	0	0	1	0	0	0	0	2866	2.60524	1	1	0
399818	BC026167	LOC399818	EEF1AKMT2	579	0	0	*	1108	1314	2950	1.41276	0	8268	2.65357	1	1	0	0	0	0	0	0	0	0	0	900	-0.299961	0	0	0	0	0	0	0	0	0	4085	1.63637	1	1	0	1004	-0.142199	0	346	0	0	0	0
25895	BC016395	DKFZP586D0919	EEF1AKMT3	681	0	0	*	1912	2718	48	0	0	0	0	0	0	0	0	0	0	6066	1.1582	0	0	0	0	0	0	1400	-0.957119	0	0	0	0	0	0	1646	-0.723581	0	0	0	0	0	0	3655	0.427326	0	0	0
1933	BC067787	EEF1B2	EEF1B2	678	0	0	*	2678	833	109	0	0	0	0	0	0	0	384	0	0	0	0	0	0	0	273	0	0	0	0	0	0	0	0	0	0	1861	1.15969	0	0	0	0	0	0	0	0	0	0	0
196549	BC021729	LOC196549	EEF1DP3	402	0	0	*	16316	18369	4137	-1.97963	0	19877	0.113827	0	0	0	7288	-1.16269	0	21147	0.20318	0	0	0	8427	-0.953196	0	0	0	0	0	0	3863	-2.07849	0	911	-4.33368	0	0	0	366	0	0	8030	-1.1938	0	0	0
196483	BC010084	FAM86A	EEF2KMT	993	0	0	*	688	1008	2613	1.92523	1	0	0	0	1	0	0	0	0	0	0	0	0	0	0	0	0	0	0	0	0	0	1120	0.703018	0	0	0	0	0	0	0	0	0	0	0	0	0	0
79645	BC025676	EFCAB1	EFCAB1	636	0	0	*	1192	490	1038	-0.199578	0	0	0	0	0	0	0	0	0	0	0	0	0	0	0	0	0	0	0	0	0	0	0	0	0	0	0	0	0	0	0	0	0	0	0	0	0	0
90288	BC066975	LOC90288	EFCAB12	1719	0	0	*	2113	902	0	0	0	0	0	0	0	0	0	0	0	0	0	0	0	0	0	0	0	0	0	0	0	0	0	0	0	0	0	0	0	0	0	0	0	0	0	0	0	0
9813	BC002525	KIAA0494	EFCAB14	1488	0	0	*	444	309	0	0	0	0	0	0	0	0	0	0	0	0	0	0	0	0	0	0	0	0	0	0	0	0	0	0	0	0	0	0	0	0	0	0	0	0	0	0	0	0
80303	BC002449	EFHD1	EFHD1	720	0	0	*	509	103	0	0	0	7	0	0	0	0	2301	2.17652	1	0	0	0	1	0	0	0	0	0	0	0	0	0	0	0	0	0	0	0	0	0	0	0	0	581	2.49589	1	1	0
1942	BC032698	EFNA1	EFNA1	618	0	0	*	4778	7031	11344	1.24745	0	4951	-0.50601	0	0	0	1863	-1.35878	0	8042	0.193824	0	0	0	961	-2.3138	0	1430	-2.29771	0	0	0	0	0	0	17252	1.29496	0	0	0	15288	1.67792	1	125	0	0	1	0
1947	BC016649	EFNB1	EFNB1	1041	0	0	*	4828	3264	0	0	0	0	0	0	0	0	1753	-1.4616	0	0	0	0	0	0	0	0	0	0	0	0	0	0	0	0	0	17247	2.40163	1	1	0	0	0	0	4846	0.570153	0	0	0
1948	BC069342	EFNB2	EFNB2	1002	0	0	*	121	886	0	0	0	0	0	0	0	0	3178	4.71504	1	0	0	0	1	0	0	0	0	2014	1.18469	0	0	0	0	0	0	0	0	0	0	0	0	0	0	0	0	0	0	0
84935	BC040165	FLJ14834	MEDAG	912	0	0	*	3454	574	267	0	0	0	0	0	0	0	0	0	0	4878	3.08717	1	1	0	0	0	0	3123	2.44381	1	1	0	0	0	0	0	0	0	0	0	0	0	0	0	0	0	0	0
25975	BC038587	EGFL6	EGFL6	1662	0	0	*	50	153	0	0	0	78	-0.971986	0	0	0	0	0	0	232	0	0	0	0	0	0	0	0	0	0	0	0	0	0	0	0	0	0	0	0	0	0	0	0	0	0	0	0
51162	BC012377	EGFL7	EGFL7	822	0	0	*	3314	2681	0	0	0	0	0	0	0	0	0	0	0	0	0	0	0	0	0	0	0	3224	0.266081	0	0	0	0	0	0	0	0	0	0	0	7572	1.1921	0	0	0	0	0	0
54583	BC005369	EGLN1	EGLN1	387	1	0	Unknown	1782	790	0	0	0	0	0	0	0	0	0	0	0	0	0	0	0	0	0	0	0	0	0	0	0	0	0	0	0	0	0	0	0	0	0	0	0	0	0	0	0	0
112398	BC001723	EGLN2	EGLN2	378	1	0	NA	3434	3449	109	0	0	0	0	0	0	0	3726	0.117738	0	0	0	0	0	0	341	0	0	7552	1.13068	0	0	0	1563	-1.13557	0	28	0	0	0	0	3366	-0.0288549	0	0	0	0	0	0
4241	BC001875	MFI2	MELTF	909	0	0	*	820	1879	3224	1.97516	1	2029	0.110804	0	1	0	0	0	0	0	0	0	0	0	1	0	0	8918	2.24676	1	1	0	276	0	0	0	0	0	0	0	19	0	0	0	0	0	0	0
55793	BC032321	FAM63A	MINDY1	1410	0	0	*	223	1570	0	0	0	1046	-0.585882	0	0	0	0	0	0	0	0	0	0	0	0	0	0	11952	2.92842	1	1	0	0	0	0	0	0	0	0	0	0	0	0	0	0	0	0	0
30846	BC014445	EHD2	EHD2	1632	0	0	*	1322	1220	0	0	0	0	0	0	0	0	0	0	0	0	0	0	0	0	0	0	0	0	0	0	0	0	3408	1.3662	0	0	0	0	0	0	3	0	0	0	0	0	0	0
30844	BC006287	EHD4	EHD4	1626	0	0	*	102	262	0	0	0	0	0	0	0	0	0	0	0	0	0	0	0	0	0	0	0	0	0	0	0	0	1094	3.42297	1	0	0	0	1	0	0	0	0	0	0	0	0	0
90523	BC009010	C6orf142	MLIP	705	0	0	*	2566	1919	7311	1.51055	1	0	0	0	1	0	0	0	0	0	0	0	0	0	1976	-0.376938	0	12059	2.65168	1	1	0	0	0	0	1188	-0.69182	0	0	0	0	0	0	3295	0.779924	0	0	0
9086	BC005248	EIF1AY	EIF1AY	435	0	0	*	5024	1030	0	0	0	2252	1.12856	0	0	0	0	0	0	0	0	0	0	0	0	0	0	0	0	0	0	0	0	0	0	1288	0.322488	0	0	0	0	0	0	235	0	0	0	0
8891	BC018728	EIF2B3	EIF2B3	1206	0	0	*	1329	2219	3019	1.18373	0	0	0	0	0	0	0	0	0	0	0	0	0	0	0	0	0	0	0	0	0	0	0	0	0	0	0	0	0	0	0	0	0	0	0	0	0	0
8890	BC001870	EIF2B4	EIF2B4	1572	0	0	*	1914	365	0	0	0	9999	4.77582	1	1	0	0	0	0	0	0	0	0	0	0	0	0	0	0	0	0	0	0	0	0	0	0	0	0	0	0	0	0	0	0	0	0	0
64223	BC017119	GBL	MLST8	981	0	0	*	287	693	13	0	0	10368	3.90314	1	1	0	0	0	0	0	0	0	0	0	671	1.22526	0	7885	3.50818	1	1	0	1182	2.04211	1	0	0	0	1	0	0	0	0	0	0	0	0	0
3646	BC008419	EIF3S6	EIF3E	1337	0	0	*	1712	2100	0	0	0	0	0	0	0	0	6959	2.0232	1	0	0	0	1	0	0	0	0	3	0	0	0	0	0	0	0	3	0	0	0	0	10486	2.61471	1	0	0	0	1	0
93380	BC033588	TMEM32	MMGT1	396	0	0	*	1211	465	2934	1.27667	0	2462	2.40453	1	1	0	0	0	0	0	0	0	0	0	481	0	0	1461	1.65165	1	1	0	0	0	0	0	0	0	0	0	0	0	0	0	0	0	0	0
9775	BC003662	DDX48	EIF4A3	1236	0	0	*	1638	2116	0	0	0	0	0	0	0	0	0	0	0	0	0	0	0	0	0	0	0	743	-1.50991	0	0	0	0	0	0	3099	0.550463	0	0	0	1730	0.0788367	0	0	0	0	0	0
1977	BC012611	EIF4E	EIF4E	654	0	0	*	2790	3333	0	0	0	0	0	0	0	0	0	0	0	0	0	0	0	0	0	0	0	0	0	0	0	0	0	0	0	453	0	0	0	0	0	0	0	0	0	0	0	0
9470	BC000360	EIF4E2	EIF4E2	771	0	0	*	4375	3530	5	0	0	6391	0.856374	0	0	0	0	0	0	0	0	0	0	0	2686	-0.703824	0	9746	1.46514	0	0	0	0	0	0	0	0	0	0	0	0	0	0	0	0	0	0	0
57798	BC019350	GATAD1	GATAD1	810	1	0	GATA	50	309	0	0	0	1827	2.5638	1	1	0	0	0	0	0	0	0	0	0	0	0	0	0	0	0	0	0	0	0	0	0	0	0	0	0	0	0	0	0	0	0	0	0
283385	BC057760	LOC283385	MORN3	723	0	0	*	998	50	0	0	0	0	0	0	0	0	7507	2.91112	1	0	0	0	1	0	68	0	0	3062	5.9364	1	1	0	367	0	0	0	0	0	0	0	0	0	0	0	0	0	0	0
1983	BC032866	EIF5	EIF5	1296	0	0	*	1450	1685	0	0	0	3568	1.08237	0	0	0	0	0	0	0	0	0	0	0	0	0	0	0	0	0	0	0	0	0	0	0	0	0	0	0	0	0	0	0	0	0	0	0
118812	BC010230	C10orf83	MORN4	441	0	0	*	5506	1089	9057	0.718029	0	1440	0.403065	0	0	0	0	0	0	9493	3.12386	1	1	0	3828	-0.524414	0	6112	2.48864	1	1	0	2798	-0.976609	0	0	0	0	0	0	0	0	0	2395	1.13702	0	0	0
55520	BC014624	ELAC1	ELAC1	1092	0	0	*	1295	1816	0	0	0	6920	1.93001	1	1	0	0	0	0	0	0	0	0	0	0	0	0	220	0	0	0	0	933	-0.473003	0	0	0	0	0	0	0	0	0	0	0	0	0	0
1996	BC036071	ELAVL4	ELAVL4	1101	0	0	*	430	2606	0	0	0	0	0	0	0	0	0	0	0	0	0	0	0	0	0	0	0	0	0	0	0	0	0	0	0	101	0	0	0	0	0	0	0	0	0	0	0	0
1997	BC030507	ELF1	ELF1	1860	1	1	Ets	618	206	296	0	0	0	0	0	0	0	932	0.592723	0	0	0	0	0	0	1	0	0	0	0	0	0	0	1211	0.97052	0	0	0	0	0	0	9809	3.98843	1	0	0	0	1	0
51073	BC000756	MRPL4	MRPL4	792	0	0	*	1482	921	0	0	0	0	0	0	0	0	0	0	0	0	0	0	0	0	659	-1.1692	0	5134	2.47881	1	1	0	0	0	0	0	0	0	0	0	0	0	0	14	0	0	0	0
11238	BC028142	CA5B	CA5B	954	0	0	*	1391	81	0	0	0	0	0	0	0	0	0	0	0	0	0	0	0	0	0	0	0	6754	6.38168	1	1	6.38168	0	0	0	0	0	0	0	0	0	0	0	0	0	0	0	0
57708	BC017423	MIER1	MIER1	471	1	0	Myb/SANT	50	375	6663	7.0581	1	0	0	0	1	7.0581	0	0	0	0	0	0	0	0	0	0	0	0	0	0	0	0	0	0	0	0	0	0	0	0	0	0	0	0	0	0	0	0
130162	BC029502	FLJ31438	CLHC1	1761	0	0	*	78	50	0	0	0	0	0	0	0	0	0	0	0	0	0	0	0	0	0	0	0	4159	6.37816	1	1	6.37816	0	0	0	0	0	0	0	0	0	0	0	0	0	0	0	0
4501	BC018190	MT1X	MT1X	186	0	0	*	2286	4063	43	0	0	7924	0.963684	0	0	0	0	0	0	6606	0.701232	0	0	0	3017	0.400289	0	12863	1.66261	1	1	0	0	0	0	5469	0.428732	0	0	0	0	0	0	0	0	0	0	0
9844	BC003051	ELMO1	ELMO1	744	0	0	*	169	72	0	0	0	0	0	0	0	0	0	0	0	0	0	0	0	0	0	0	0	0	0	0	0	0	0	0	0	0	0	0	0	0	0	0	0	0	0	0	0	0
79767	BC034410	ELMO3	ELMO3	1824	0	0	*	1763	1682	0	0	0	0	0	0	0	0	0	0	0	0	0	0	0	0	0	0	0	4184	1.31471	0	0	0	0	0	0	0	0	0	0	0	0	0	0	0	0	0	0	0
55531	BC028725	ELMOD1	ELMOD1	852	0	0	*	998	2453	0	0	0	0	0	0	0	0	0	0	0	0	0	0	0	0	0	0	0	0	0	0	0	0	0	0	0	0	0	0	0	0	0	0	0	0	0	0	0	0
9318	BC012629	COPS2	COPS2	1332	1	0	Unknown	50	50	4984	6.63923	1	0	0	0	1	6.63923	55	0	0	0	0	0	0	0	5650	6.82018	1	0	0	0	1	6.82018	13710	8.09908	1	0	0	0	1	8.09908	3446	6.10685	1	0	0	0	1	6.10685
10013	BC013737	HDAC6	HDAC6	3192	1	0	Unknown	50	805	9346	7.54628	1	0	0	0	1	7.54628	14959	8.22487	1	0	0	0	1	8.22487	15160	8.24413	1	0	0	0	1	8.24413	22360	8.80478	1	0	0	0	1	8.80478	63539	10.3115	1	0	0	0	1	10.3115
6921	BC013809	TCEB1	ELOC	339	1	0	NA	3218	4482	9556	1.57024	1	0	0	0	1	0	0	0	0	0	0	0	0	0	0	0	0	9834	1.13364	0	0	0	15	0	0	1685	-1.41139	0	0	0	0	0	0	0	0	0	0	0
84337	BC007516	ELOF1	ELOF1	252	0	0	*	6006	1882	793	-2.92101	0	43	0	0	0	0	0	0	0	0	0	0	0	0	0	0	0	1919	0.0280881	0	0	0	12100	1.01053	0	0	0	0	0	0	17	0	0	0	0	0	0	0
64834	BC000618	ELOVL1	ELOVL1	840	0	0	*	802	640	0	0	0	0	0	0	0	0	0	0	0	0	0	0	0	0	0	0	0	0	0	0	0	0	8210	3.35571	1	0	0	0	1	0	0	0	0	0	0	0	0	0
54898	BC060809	ELOVL2	ELOVL2	891	0	0	*	3378	2465	7527	1.15591	0	0	0	0	0	0	1479	-1.19155	0	3226	0.388159	0	0	0	3	0	0	174	0	0	0	0	0	0	0	0	0	0	0	0	0	0	0	4901	0.991489	0	0	0
83401	BC034344	ELOVL3	ELOVL3	813	0	0	*	2616	1598	0	0	0	16312	3.35159	1	1	0	0	0	0	0	0	0	0	0	0	0	0	3004	0.910617	0	0	0	0	0	0	15701	3.29652	1	1	0	0	0	0	0	0	0	0	0
51537	BC001608	MTP18	MTFP1	501	0	0	*	2398	3096	294	0	0	0	0	0	0	0	1479	-0.69721	0	0	0	0	0	0	0	0	0	9028	1.544	1	1	0	0	0	0	156	0	0	0	0	0	0	0	2188	-0.500793	0	0	0
10588	BC019921	MTHFS	MTHFS	612	0	0	*	2162	1108	0	0	0	0	0	0	0	0	0	0	0	0	0	0	0	0	716	-1.59434	0	4752	2.10058	1	1	0	199	0	0	0	0	0	0	0	0	0	0	305	0	0	0	0
29116	BC002860	MYLIP	MYLIP	1338	0	0	*	2403	1083	2861	0.251683	0	0	0	0	0	0	0	0	0	0	0	0	0	0	0	0	0	4199	1.95501	1	1	0	3	0	0	0	0	0	0	0	0	0	0	152	0	0	0	0
80218	BC012731	MAK3	NAA50	510	0	0	*	3232	1482	2466	-0.390254	0	0	0	0	0	0	0	0	0	0	0	0	0	0	0	0	0	12331	3.05667	1	1	0	0	0	0	1582	0.0942042	0	0	0	0	0	0	0	0	0	0	0
51016	BC002491	C14orf122	EMC9	627	0	0	*	2749	3402	1137	-1.27367	0	0	0	0	0	0	0	0	0	0	0	0	0	0	0	0	0	0	0	0	0	0	0	0	0	0	0	0	0	0	0	0	0	3281	-0.0522475	0	0	0
4675	BC034954	NAP1L3	NAP1L3	1521	1	1	NA	1189	1102	29	0	0	0	0	0	0	0	0	0	0	0	0	0	0	0	0	0	0	3979	1.85228	1	1	0	0	0	0	0	0	0	0	0	0	0	0	0	0	0	0	0
3347	BC009791	HTN3	HTN3	156	0	0	*	50	2550	0	0	0	0	0	0	0	0	0	0	0	0	0	0	0	0	0	0	0	0	0	0	0	0	13009	8.02337	1	0	0	0	1	8.02337	0	0	0	0	0	0	0	0
24139	BC032630	EML2	EML2	1284	0	0	*	7671	11672	5253	-0.546273	0	8583	-0.443498	0	0	0	5534	-0.471092	0	540	-4.43395	0	0	0	6658	-0.204326	0	2720	-2.10137	0	0	0	5268	-0.542159	0	0	0	0	0	0	3	0	0	9927	-0.233622	0	0	0
4688	BC001606	NCF2	NCF2	1581	0	0	*	3916	802	5405	0.464914	0	0	0	0	0	0	0	0	0	5001	2.64054	1	1	0	0	0	0	8737	3.44546	1	1	0	0	0	0	0	0	0	0	0	0	0	0	0	0	0	0	0
2012	BC047300	EMP1	EMP1	474	0	0	*	2431	2852	0	0	0	13510	2.24398	1	1	0	0	0	0	0	0	0	0	0	0	0	0	0	0	0	0	0	0	0	0	3856	0.435131	0	0	0	0	0	0	0	0	0	0	0
2014	BC009718	EMP3	EMP3	492	0	0	*	11443	11969	1225	-3.22361	0	0	0	0	0	0	822	-3.79918	0	13784	0.203692	0	0	0	1205	-3.24736	0	21	0	0	0	0	3796	-1.59191	0	18594	0.635535	0	0	0	0	0	0	4126	-1.53649	0	0	0
10112	BC012999	KIF20A	KIF20A	2673	0	0	*	320	50	0	0	0	0	0	0	0	0	0	0	0	0	0	0	0	0	0	0	0	6360	6.99095	1	1	6.99095	0	0	0	690	3.7866	1	1	0	0	0	0	0	0	0	0	0
2023	BC011130	ENO1	ENO1	1305	1	1	Unknown	948	97	323	0	0	0	0	0	0	0	3616	1.93144	1	0	0	0	1	0	0	0	0	3	0	0	0	0	0	0	0	475	0	0	0	0	0	0	0	0	0	0	0	0
2026	BC002745	ENO2	ENO2	1305	0	0	*	1231	94	246	0	0	0	0	0	0	0	2137	0.795756	0	355	0	0	0	0	0	0	0	0	0	0	0	0	88	0	0	0	0	0	0	0	0	0	0	0	0	0	0	0
10495	BC019254	COVA1	ENOX2	954	0	0	*	2220	487	0	0	0	0	0	0	0	0	7068	1.67074	1	0	0	0	1	0	1	0	0	0	0	0	0	0	0	0	0	0	0	0	0	0	0	0	0	0	0	0	0	0
4693	BC029901	NDP	NDP	402	1	0	Unknown	11710	5393	0	0	0	0	0	0	0	0	4822	-1.28004	0	0	0	0	0	0	1842	-2.6684	0	19186	1.83089	1	1	0	3153	-1.89294	0	341	0	0	0	0	0	0	0	0	0	0	0	0
954	BC035738	ENTPD2	ENTPD2	1488	0	0	*	2864	1732	0	0	0	0	0	0	0	0	0	0	0	0	0	0	0	0	0	0	0	0	0	0	0	0	1956	-0.550125	0	1056	-0.713829	0	0	0	0	0	0	2021	0.22263	0	0	0
956	BC029869	ENTPD3	ENTPD3	1359	0	0	*	606	393	0	0	0	0	0	0	0	0	0	0	0	0	0	0	0	0	0	0	0	183	0	0	0	0	0	0	0	4966	3.65948	1	1	0	0	0	0	125	0	0	0	0
56943	BC007870	ENY2	ENY2	306	0	0	*	890	122	0	0	0	0	0	0	0	0	15288	4.10245	1	0	0	0	1	0	0	0	0	0	0	0	0	0	0	0	0	0	0	0	0	0	0	0	0	0	0	0	0	0
285203	BC060887	AER61	EOGT	1332	0	0	*	2126	2260	0	0	0	16457	2.86431	1	1	0	0	0	0	11731	2.37593	1	1	0	0	0	0	0	0	0	0	0	0	0	0	0	0	0	0	0	2548	0.261224	0	0	0	0	0	0
347918	BC066974	EP400NL	EP400P1	1260	0	0	*	97	599	0	0	0	0	0	0	0	0	0	0	0	0	0	0	0	0	0	0	0	0	0	0	0	0	1572	4.01847	1	0	0	0	1	0	0	0	0	0	0	0	0	0
4722	BC000617	NDUFS3	NDUFS3	795	0	0	*	148	2191	3	0	0	0	0	0	0	0	0	0	0	0	0	0	0	0	0	0	0	9107	2.05539	1	1	0	8131	5.77976	1	0	0	0	1	0	0	0	0	0	0	0	0	0
23136	BC006141	EPB41L3	EPB41L3	2598	0	0	*	1248	403	0	0	0	0	0	0	0	0	0	0	0	0	0	0	0	0	968	-0.366539	0	0	0	0	0	0	2247	0.848382	0	0	0	0	0	0	0	0	0	0	0	0	0	0
55301	BC050372	THEDC1	OLAH	798	0	0	*	560	50	0	0	0	0	0	0	0	0	0	0	0	0	0	0	0	0	0	0	0	4361	6.44659	1	1	6.44659	0	0	0	0	0	0	0	0	0	0	0	0	0	0	0	0
2045	BC027940	EPHA7	EPHA7	840	0	0	*	17815	11675	15767	-0.176184	0	12613	0.111489	0	0	0	0	0	0	8551	-0.449257	0	0	0	30	0	0	694	-4.07234	0	0	0	422	0	0	6497	-0.845577	0	0	0	0	0	0	9318	-0.32533	0	0	0
2046	BC038796	EPHA8	EPHA8	1488	0	0	*	512	91	0	0	0	0	0	0	0	0	0	0	0	0	0	0	0	0	0	0	0	0	0	0	0	0	0	0	0	0	0	0	0	0	0	0	0	0	0	0	0	0
2050	BC052804	EPHB4	EPHB4	2964	0	0	*	4421	1439	3358	-0.396771	0	0	0	0	0	0	2795	-0.661524	0	0	0	0	0	0	11638	1.3964	0	0	0	0	0	0	9903	1.16349	0	0	0	0	0	0	11764	1.41193	0	0	0	0	0	0
2052	BC008291	EPHX1	EPHX1	1368	0	0	*	800	334	0	0	0	2178	2.70508	1	1	0	55	0	0	587	0.813512	0	0	0	0	0	0	0	0	0	0	0	0	0	0	0	0	0	0	0	0	0	0	0	0	0	0	0
4747	BC039237	NEFL	NEFL	1632	0	0	*	2523	783	0	0	0	131	-2.57945	0	0	0	0	0	0	0	0	0	0	0	0	0	0	4312	2.46127	1	1	0	0	0	0	0	0	0	0	0	3	0	0	0	0	0	0	0
7957	BC005286	EPM2A	EPM2A	267	0	0	*	880	437	0	0	0	1114	1.35004	0	0	0	0	0	0	0	0	0	0	0	0	0	0	147	0	0	0	0	4846	2.46122	1	0	0	0	1	0	1641	0.899	0	152	0	0	0	0
29924	BC044651	EPN1	EPN1	1653	0	0	*	1448	911	0	0	0	0	0	0	0	0	0	0	0	0	0	0	0	0	0	0	0	0	0	0	0	0	232	0	0	0	0	0	0	0	4347	1.58596	1	0	0	0	1	0
55040	BC001038	EPN3	EPN3	627	0	0	*	2544	6285	0	0	0	7565	0.267427	0	0	0	0	0	0	10218	0.701128	0	0	0	0	0	0	2986	-1.0737	0	0	0	0	0	0	0	0	0	0	0	0	0	0	9082	0.531097	0	0	0
79083	BC051269	MLPH	MLPH	1719	0	0	*	50	908	5899	6.8824	1	0	0	0	1	6.8824	0	0	0	0	0	0	0	0	0	0	0	0	0	0	0	0	0	0	0	0	0	0	0	0	0	0	0	0	0	0	0	0
54869	BC015763	EPS8L1	EPS8L1	1791	0	0	*	2449	2718	9532	1.96059	1	0	0	0	1	0	4219	0.784708	0	15930	2.55113	1	1	0	0	0	0	6616	1.28341	0	0	0	6553	1.41996	0	2308	-0.235902	0	0	0	0	0	0	6659	1.29276	0	0	0
4815	BC057766	NINJ2	NINJ2	429	0	0	*	2392	2675	0	0	0	0	0	0	0	0	0	0	0	26441	3.30517	1	1	0	44	0	0	9599	1.84335	1	1	0	0	0	0	0	0	0	0	0	0	0	0	0	0	0	0	0
2065	BC002706	ERBB3	ERBB3	996	0	0	*	988	1105	0	0	0	0	0	0	0	0	0	0	0	0	0	0	0	0	0	0	0	0	0	0	0	0	0	0	0	0	0	0	0	0	0	0	0	0	0	0	0	0
4817	BC046149	NIT1	NIT1	732	0	0	*	2860	1464	312	0	0	13553	3.21062	1	1	0	5589	0.966575	0	3566	1.28439	0	0	0	0	0	0	4667	1.67258	1	1	0	0	0	0	0	0	0	0	0	0	0	0	222	0	0	0	0
2068	BC008346	ERCC2	ERCC2	1218	1	1	NA	1775	1248	0	0	0	0	0	0	0	0	0	0	0	0	0	0	0	0	1223	-0.537395	0	0	0	0	0	0	0	0	0	0	0	0	0	0	0	0	0	0	0	0	0	0
54821	BC008808	FLJ20105	ERCC6L	1260	0	0	*	1116	424	0	0	0	0	0	0	0	0	0	0	0	0	0	0	0	0	0	0	0	0	0	0	0	0	0	0	0	0	0	0	0	0	0	0	0	0	0	0	0	0
3047	BC010913	HBG1	HBG1	444	0	0	*	50	156	0	0	0	0	0	0	0	0	0	0	0	0	0	0	0	0	0	0	0	0	0	0	0	0	0	0	0	0	0	0	0	0	0	0	0	0	0	0	0	0
51614	BC009765	C20orf47	ERGIC3	1152	0	0	*	2946	3580	1871	-0.654948	0	0	0	0	0	0	7890	1.42127	0	818	-2.12979	0	0	0	4142	0.49157	0	9080	1.34273	0	0	0	0	0	0	0	0	0	0	0	0	0	0	222	0	0	0	0
2079	BC014301	ERH	ERH	315	0	0	*	5089	4778	0	0	0	24151	2.3376	1	1	0	493	0	0	3288	-0.539197	0	0	0	740	-2.78179	0	6393	0.420086	0	0	0	0	0	0	12245	1.35771	0	0	0	0	0	0	15091	1.65921	1	1	0
112479	BC010503	MGC16943	ERI2	987	1	0	NA	50	524	0	0	0	14	0	0	0	0	0	0	0	0	0	0	0	0	0	0	0	0	0	0	0	0	2176	5.44361	1	0	0	0	1	0	0	0	0	0	0	0	0	0
79033	BC001072	PRNPIP	ERI3	387	0	0	*	680	1960	0	0	0	0	0	0	0	0	0	0	0	0	0	0	0	0	0	0	0	0	0	0	0	0	0	0	0	0	0	0	0	0	0	0	0	0	0	0	0	0
27248	BC022228	C2orf30	ERLEC1	1290	0	0	*	1253	552	0	0	0	0	0	0	0	0	0	0	0	0	0	0	0	0	0	0	0	0	0	0	0	0	0	0	0	0	0	0	0	0	0	0	0	0	0	0	0	0
79956	BC031630	KIAA1815	ERMP1	954	1	0	NA	666	2902	0	0	0	2852	-0.0250735	0	0	0	0	0	0	15	0	0	0	0	0	0	0	1250	-1.21512	0	0	0	0	0	0	0	0	0	0	0	0	0	0	3752	0.370612	0	0	0
30001	BC008674	ERO1L	ERO1A	1407	0	0	*	50	72	0	0	0	25	0	0	0	0	0	0	0	0	0	0	0	0	0	0	0	0	0	0	0	0	0	0	0	0	0	0	0	0	0	0	0	0	0	0	0	0
23071	BC005374	TXNDC4	ERP44	1221	0	0	*	50	50	0	0	0	0	0	0	0	0	0	0	0	0	0	0	0	0	0	0	0	0	0	0	0	0	1921	5.26379	1	0	0	0	1	0	0	0	0	0	0	0	0	0
79576	BC032442	NKAP	NKAP	1248	0	0	*	2399	565	0	0	0	0	0	0	0	0	0	0	0	0	0	0	0	0	0	0	0	1938	1.77825	1	1	0	0	0	0	0	0	0	0	0	0	0	0	0	0	0	0	0
2098	BC001169	ESD	ESD	849	0	0	*	8454	8139	9764	0.207838	0	0	0	0	0	0	1479	-2.51501	0	93	0	0	0	0	3042	-1.47461	0	10711	0.39617	0	0	0	0	0	0	0	0	0	0	0	17783	1.07279	0	12142	0.577083	0	0	0
51406	BC023517	NOL7	NOL7	774	0	0	*	289	1173	0	0	0	0	0	0	0	0	0	0	0	0	0	0	0	0	809	1.48507	0	8493	2.85607	1	1	0	282	0	0	0	0	0	0	0	105	0	0	0	0	0	0	0
8220	BC006542	DGCR14	ESS2	1431	0	0	*	802	918	0	0	0	0	0	0	0	0	0	0	0	0	0	0	0	0	0	0	0	0	0	0	0	0	0	0	0	0	0	0	0	0	0	0	0	0	0	0	0	0
57488	BC013957	FAM62B	ESYT2	1077	0	0	*	3318	852	11	0	0	0	0	0	0	0	0	0	0	0	0	0	0	0	314	0	0	0	0	0	0	0	748	-2.1492	0	0	0	0	0	0	3488	0.0720862	0	941	0.143341	0	0	0
2108	BC015526	ETFA	ETFA	1002	0	0	*	2293	474	0	0	0	0	0	0	0	0	0	0	0	0	0	0	0	0	0	0	0	0	0	0	0	0	0	0	0	0	0	0	0	0	0	0	0	0	0	0	0	0
9221	BC006769	NOLC1	NOLC1	1257	1	0	NA	712	1014	0	0	0	2149	1.08361	0	0	0	0	0	0	0	0	0	0	0	0	0	0	3267	1.68791	1	1	0	0	0	0	0	0	0	0	0	0	0	0	0	0	0	0	0
23474	BC008250	ETHE1	ETHE1	765	0	0	*	2361	2400	2912	0.302612	0	0	0	0	0	0	0	0	0	7347	1.61412	1	1	0	3424	0.536285	0	553	-2.11768	0	0	0	12	0	0	10498	2.12901	1	1	0	0	0	0	17029	2.82689	1	1	0
55500	BC066907	ETNK1	ETNK1	1359	0	0	*	1095	1064	0	0	0	0	0	0	0	0	0	0	0	0	0	0	0	0	0	0	0	0	0	0	0	0	0	0	0	0	0	0	0	0	0	0	0	0	0	0	0	0
79716	BC020507	NPEPL1	NPEPL1	1236	0	0	*	1754	137	0	0	0	0	0	0	0	0	0	0	0	77	0	0	0	0	0	0	0	5217	5.25097	1	1	0	0	0	0	0	0	0	0	0	0	0	0	0	0	0	0	0
2114	BC042954	ETS2	ETS2	1410	1	1	Ets	487	1358	0	0	0	0	0	0	0	0	0	0	0	4337	1.67521	1	1	0	0	0	0	0	0	0	0	0	0	0	0	0	0	0	0	0	0	0	0	0	0	0	0	0
51478	BC065246	HSD17B7	HSD17B7	1026	0	0	*	50	3258	3	0	0	192	-4.08481	0	0	0	0	0	0	448	0	0	0	0	12	0	0	4826	0.566841	0	0	0	0	0	0	0	0	0	0	0	0	0	0	111	0	0	0	0
51513	BC035853	ETV7	ETV7	1026	1	1	Ets	12832	7187	14083	0.134209	0	0	0	0	0	0	10575	-0.279088	0	725	-3.30934	0	0	0	7486	-0.777479	0	11488	0.676666	0	0	0	50	0	0	11191	0.638877	0	0	0	341	0	0	0	0	0	0	0
55194	BC006241	C1orf78	EVA1B	498	0	0	*	4990	1548	5936	0.250451	0	0	0	0	0	0	1370	-1.86486	0	216	0	0	0	0	56	0	0	79	0	0	0	0	214	0	0	198	0	0	0	0	3	0	0	402	0	0	0	0
51466	BC032358	EVL	EVL	1257	0	0	*	2054	659	0	0	0	0	0	0	0	0	0	0	0	2176	1.72333	1	1	0	0	0	0	0	0	0	0	0	2992	0.542674	0	53	0	0	0	0	0	0	0	6300	3.257	1	1	0
55218	BC001962	C14orf114	EXD2	1491	0	0	*	568	1177	0	0	0	0	0	0	0	0	0	0	0	0	0	0	0	0	0	0	0	0	0	0	0	0	0	0	0	5603	2.25109	1	1	0	0	0	0	0	0	0	0	0
54932	BC037355	FLJ20433	EXD3	741	0	0	*	7470	1951	53	0	0	0	0	0	0	0	0	0	0	479	0	0	0	0	3913	-0.932833	0	1470	-0.408398	0	0	0	0	0	0	0	0	0	0	0	0	0	0	997	-0.968548	0	0	0
64789	BC021969	C1orf176	EXO5	1122	0	0	*	232	864	0	0	0	0	0	0	0	0	0	0	0	0	0	0	0	0	0	0	0	0	0	0	0	0	0	0	0	601	-0.523666	0	0	0	0	0	0	0	0	0	0	0
51010	BC002437	EXOSC3	EXOSC3	828	0	0	*	1252	281	0	0	0	0	0	0	0	0	0	0	0	0	0	0	0	0	21	0	0	0	0	0	0	0	1745	0.478992	0	0	0	0	0	0	0	0	0	0	0	0	0	0
5264	BC029512	PHYH	PHYH	1017	0	0	*	761	50	0	0	0	0	0	0	0	0	0	0	0	0	0	0	0	0	0	0	0	3851	6.26716	1	1	6.26716	0	0	0	0	0	0	0	0	0	0	0	0	0	0	0	0
56915	BC007742	EXOSC5	EXOSC5	708	0	0	*	6243	4741	5216	-0.259296	0	28	0	0	0	0	0	0	0	1775	-1.41737	0	0	0	11065	0.825692	0	1821	-1.38046	0	0	0	2816	-1.14859	0	6801	0.520555	0	0	0	0	0	0	22803	2.26596	1	1	0
5501	BC014073	PPP1CC	PPP1CC	972	0	0	*	1908	50	0	0	0	0	0	0	0	0	0	0	0	0	0	0	0	0	0	0	0	8056	7.33199	1	1	7.33199	0	0	0	0	0	0	0	0	0	0	0	0	0	0	0	0
2139	BC008803	EYA2	EYA2	1545	1	1	NA	703	565	515	-0.448952	0	0	0	0	0	0	0	0	0	4013	2.82836	1	1	0	1609	1.19457	0	0	0	0	0	0	9985	3.82817	1	0	0	0	1	0	8	0	0	0	0	0	0	0
4953	BC025296	ODC1	ODC1	1386	0	0	*	841	584	0	0	0	0	0	0	0	0	0	0	0	0	0	0	0	0	0	0	0	6075	3.37884	1	1	0	0	0	0	0	0	0	0	0	0	0	0	0	0	0	0	0
4967	BC009580	OGDH	OGDH	1284	0	0	*	4498	2050	0	0	0	525	-1.96523	0	0	0	14685	1.70699	1	31	0	0	1	0	2567	-0.8092	0	16867	3.04051	1	1	0	5391	0.261269	0	9490	2.21078	1	1	0	0	0	0	0	0	0	0	0
22836	BC041337	RHOBTB3	RHOBTB3	1836	0	0	*	2292	50	0	0	0	0	0	0	0	0	0	0	0	0	0	0	0	0	0	0	0	8474	7.40497	1	1	7.40497	0	0	0	0	0	0	0	0	0	0	0	0	0	0	0	0
2159	BC046125	F10	F10	1467	0	0	*	960	50	0	0	0	0	0	0	0	0	0	0	0	0	0	0	0	0	0	0	0	0	0	0	0	0	2927	1.60832	1	0	0	0	1	0	0	0	0	0	0	0	0	0
50848	BC001533	F11R	F11R	900	0	0	*	2245	3155	0	0	0	0	0	0	0	0	0	0	0	5171	0.712803	0	0	0	1	0	0	660	-2.2571	0	0	0	0	0	0	10213	1.69469	1	1	0	0	0	0	0	0	0	0	0
64172	BC011904	OSGEPL1	OSGEPL1	1245	0	0	*	50	493	0	0	0	0	0	0	0	0	0	0	0	0	0	0	0	0	0	0	0	0	0	0	0	0	4640	6.53605	1	0	0	0	1	6.53605	0	0	0	0	0	0	0	0
2152	BC011029	F3	F3	888	0	0	*	1406	537	0	0	0	0	0	0	0	0	0	0	0	0	0	0	0	0	1631	0.21416	0	0	0	0	0	0	0	0	0	0	0	0	0	0	0	0	0	69	0	0	0	0
2157	BC022513	F8	F8	651	0	0	*	2038	3910	2469	0.276773	0	5405	0.467126	0	0	0	0	0	0	6792	0.796668	0	0	0	1956	-0.0592477	0	4352	0.15451	0	0	0	0	0	0	4524	0.21043	0	0	0	8290	2.02422	1	0	0	0	1	0
79152	BC017049	FA2H	FA2H	843	0	0	*	6918	6800	0	0	0	11393	0.744541	0	0	0	21534	1.63819	1	8567	0.333255	0	1	0	16	0	0	28	0	0	0	0	10398	0.587879	0	7928	0.221422	0	0	0	0	0	0	14717	1.11388	0	0	0
80233	BC008883	FLJ22175	FAAP100	702	0	0	*	780	715	0	0	0	0	0	0	0	0	0	0	0	0	0	0	0	0	0	0	0	0	0	0	0	0	0	0	0	0	0	0	0	0	0	0	0	3794	2.4077	1	1	0
91442	BC003535	MGC32020	FAAP24	648	1	0	Unknown	2654	3979	0	0	0	9229	1.21377	0	0	0	2630	-0.0131056	0	3581	-0.152043	0	0	0	2993	0.173424	0	0	0	0	0	0	1566	-0.761084	0	0	0	0	0	0	3	0	0	97	0	0	0	0
2170	BC007021	FABP3	FABP3	402	0	0	*	1535	2044	0	0	0	0	0	0	0	0	0	0	0	0	0	0	0	0	0	0	0	3356	0.715348	0	0	0	0	0	0	6899	1.75499	1	1	0	0	0	0	0	0	0	0	0
2167	BC003672	FABP4	FABP4	399	0	0	*	1473	946	0	0	0	0	0	0	0	0	7068	2.26254	1	0	0	0	1	0	181	0	0	0	0	0	0	0	0	0	0	1470	0.635904	0	0	0	0	0	0	3295	1.80037	1	1	0
2172	BC022489	FABP6	FABP6	387	0	0	*	1808	2768	0	0	0	0	0	0	0	0	0	0	0	10697	1.95029	1	1	0	0	0	0	0	0	0	0	0	0	0	0	5061	0.870579	0	0	0	0	0	0	0	0	0	0	0
3995	BC004901	FADS3	FADS3	1338	0	0	*	1770	1117	4994	1.49645	0	0	0	0	0	0	0	0	0	46	0	0	0	0	0	0	0	0	0	0	0	0	0	0	0	872	-0.357229	0	0	0	0	0	0	0	0	0	0	0
2184	BC002527	FAH	FAH	1260	0	0	*	50	81	0	0	0	0	0	0	0	0	0	0	0	0	0	0	0	0	0	0	0	0	0	0	0	0	0	0	0	0	0	0	0	0	0	0	0	0	0	0	0	0
51011	BC009403	FAHD2A	FAHD2A	945	0	0	*	1643	793	0	0	0	0	0	0	0	0	0	0	0	0	0	0	0	0	0	0	0	0	0	0	0	0	26	0	0	0	0	0	0	0	0	0	0	0	0	0	0	0
7923	BC008185	HSD17B8	HSD17B8	786	0	0	*	50	752	0	0	0	0	0	0	0	0	9425	7.55842	1	0	0	0	1	7.55842	0	0	0	0	0	0	0	0	0	0	0	5167	2.78052	1	1	0	0	0	0	0	0	0	0	0
399665	BC047949	C9orf132	FAM102A	729	0	0	*	4170	2568	4786	0.198773	0	227	-3.49988	0	0	0	0	0	0	13012	2.34113	1	1	0	0	0	0	0	0	0	0	0	0	0	0	1548	-0.73024	0	0	0	0	0	0	0	0	0	0	0
56944	BC009920	OLFML3	OLFML3	1221	0	0	*	599	908	0	0	0	0	0	0	0	0	0	0	0	309	0	0	0	0	0	0	0	7084	2.9638	1	1	0	38	0	0	6271	2.78793	1	1	0	0	0	0	2589	1.51163	1	1	0
83541	BC022238	C20orf55	FAM110A	888	0	0	*	2681	1099	0	0	0	0	0	0	0	0	0	0	0	0	0	0	0	0	2285	-0.230577	0	2439	1.1501	0	0	0	0	0	0	0	0	0	0	0	291	0	0	941	-0.223925	0	0	0
54954	BC016138	CXorf17	FAM120C	399	0	0	*	1346	144	0	0	0	0	0	0	0	0	0	0	0	324	0	0	0	0	456	0	0	12	0	0	0	0	0	0	0	0	0	0	0	0	0	0	0	2008	3.80162	1	1	0
79664	BC013684	NARG2	ICE2	999	0	0	*	50	899	0	0	0	0	0	0	0	0	4603	6.5245	1	0	0	0	1	6.5245	0	0	0	0	0	0	0	0	0	0	0	11	0	0	0	0	0	0	0	554	-0.698435	0	0	0
159091	BC017868	RP3-473B4.0	FAM122C	459	0	0	*	9883	5561	8680	-0.187254	0	518	-3.42432	0	0	0	0	0	0	14046	1.33674	0	0	0	3	0	0	413	0	0	0	0	2347	-2.07413	0	12044	1.1149	0	0	0	0	0	0	7047	0.341665	0	0	0
220108	BC051771	FLJ30707	FAM124A	1641	0	0	*	1037	665	467	0	0	0	0	0	0	0	0	0	0	3103	2.22224	1	1	0	0	0	0	101	0	0	0	0	0	0	0	0	0	0	0	0	2010	0.95478	0	1385	1.05846	0	0	0
26275	BC005190	HIBCH	HIBCH	1002	0	0	*	50	612	0	0	0	0	0	0	0	0	0	0	0	0	0	0	0	0	0	0	0	0	0	0	0	0	0	0	0	0	0	0	0	0	0	0	0	0	0	0	0	0
131408	BC037299	MGC21688	FAM131A	846	0	0	*	500	368	0	0	0	0	0	0	0	0	0	0	0	0	0	0	0	0	833	0.736388	0	0	0	0	0	0	0	0	0	0	0	0	0	0	0	0	0	0	0	0	0	0
348487	BC016848	C1orf117	FAM131C	843	0	0	*	391	59	0	0	0	0	0	0	0	0	0	0	0	1250	4.40507	1	1	0	0	0	0	0	0	0	0	0	3895	3.31638	1	0	0	0	1	0	0	0	0	0	0	0	0	0
10144	BC063126	FAM13A1	FAM13A	609	0	0	*	979	272	0	0	0	0	0	0	0	0	0	0	0	0	0	0	0	0	0	0	0	0	0	0	0	0	0	0	0	0	0	0	0	0	0	0	0	0	0	0	0	0
338094	BC020874	C1orf179	FAM151A	1758	0	0	*	2392	5533	0	0	0	0	0	0	0	0	0	0	0	0	0	0	0	0	2798	0.226179	0	1439	-1.943	0	0	0	0	0	0	5550	0.00442585	0	0	0	1944	-0.299189	0	4389	-0.33417	0	0	0
29057	BC000867	TMEM29	FAM156A	525	0	0	*	3247	1376	0	0	0	0	0	0	0	0	0	0	0	0	0	0	0	0	989	-1.71506	0	1277	-0.107722	0	0	0	5679	0.80653	0	3096	1.16993	0	0	0	0	0	0	3738	1.44179	0	0	0
64760	BC012865	RAI16	FAM160B2	1038	0	0	*	1699	2444	0	0	0	2589	0.0831507	0	0	0	0	0	0	0	0	0	0	0	0	0	0	2864	0.228787	0	0	0	0	0	0	0	0	0	0	0	0	0	0	0	0	0	0	0
4975	BC069365	OMP	OMP	492	0	0	*	570	103	9300	4.0282	1	0	0	0	1	0	0	0	0	0	0	0	0	0	0	0	0	1308	3.66665	1	1	0	9207	4.0137	1	3	0	0	1	0	0	0	0	1634	3.98769	1	1	0
84734	BC004269	C1orf90	FAM167B	225	0	0	*	894	487	0	0	0	0	0	0	0	0	0	0	0	0	0	0	0	0	0	0	0	0	0	0	0	0	0	0	0	0	0	0	0	0	0	0	0	0	0	0	0	0
23201	BC052341	KIAA0280	FAM168A	708	0	0	*	1728	2069	0	0	0	0	0	0	0	0	0	0	0	62	0	0	0	0	0	0	0	3074	0.571184	0	0	0	0	0	0	0	0	0	0	0	0	0	0	0	0	0	0	0
284069	BC030200	MGC34829	FAM171A2	246	0	0	*	1562	499	0	0	0	0	0	0	0	0	9260	2.56762	1	0	0	0	1	0	0	0	0	0	0	0	0	0	0	0	0	0	0	0	0	0	0	0	0	8556	4.09982	1	1	0
283635	BC029559	C14orf24	FAM177A1	642	0	0	*	2402	2544	0	0	0	0	0	0	0	0	0	0	0	0	0	0	0	0	4524	0.913363	0	0	0	0	0	0	0	0	0	2381	-0.0955311	0	0	0	0	0	0	0	0	0	0	0
222234	BC029175	MGC35361	FAM185A	435	0	0	*	3196	4191	1890	-0.757881	0	0	0	0	0	0	0	0	0	5757	0.458023	0	0	0	4927	0.624442	0	6	0	0	0	0	3130	-0.0301048	0	7109	0.762352	0	0	0	1902	-0.74875	0	0	0	0	0	0
9413	BC021685	C9orf61	FAM189A2	531	0	0	*	5583	5171	192	0	0	1270	-2.02561	0	0	0	0	0	0	9076	0.811613	0	0	0	0	0	0	7625	0.560294	0	0	0	1440	-1.95497	0	11831	1.19406	0	0	0	6674	0.257511	0	0	0	0	0	0
10712	BC040136	C1orf2	FAM189B	1719	1	0	NA	2380	318	4418	0.892432	0	2419	2.92731	1	1	0	0	0	0	0	0	0	0	0	0	0	0	0	0	0	0	0	2684	0.173423	0	0	0	0	0	0	0	0	0	1232	1.9539	1	1	0
54880	BC063536	BCOR	BCOR	564	1	0	Unknown	50	3502	12890	8.01011	1	4256	0.281319	0	1	8.01011	3233	6.0148	1	0	0	0	1	6.0148	2780	5.79701	1	0	0	0	1	0	11225	7.81057	1	0	0	0	1	7.81057	1869	5.22419	1	8750	1.3211	0	1	0
85395	BC009341	C21orf70	FAM207A	693	0	0	*	277	165	5630	4.34518	1	0	0	0	1	0	0	0	0	0	0	0	0	0	0	0	0	0	0	0	0	0	0	0	0	0	0	0	0	0	0	0	0	0	0	0	0	0
54757	BC036222	FAM20A	FAM20A	744	0	0	*	1390	2210	12191	3.13266	1	0	0	0	1	0	0	0	0	0	0	0	0	0	1240	-0.164745	0	6063	1.45599	0	0	0	739	-0.911439	0	0	0	0	0	0	7195	2.37191	1	5967	1.43296	0	1	0
9917	BC046441	FAM20B	FAM20B	1230	0	0	*	139	549	0	0	0	0	0	0	0	0	0	0	0	0	0	0	0	0	0	0	0	0	0	0	0	0	0	0	0	3	0	0	0	0	0	0	0	0	0	0	0	0
125228	BC022410	C18orf19	FAM210A	819	0	0	*	1895	278	11	0	0	0	0	0	0	0	0	0	0	0	0	0	0	0	0	0	0	0	0	0	0	0	0	0	0	0	0	0	0	0	0	0	0	0	0	0	0	0
29902	BC020967	HSU79274	FAM216A	822	0	0	*	763	137	0	0	0	0	0	0	0	0	5151	2.7551	1	31	0	0	1	0	0	0	0	0	0	0	0	0	0	0	0	1333	3.28243	1	1	0	0	0	0	14	0	0	0	0
152756	BC022381	FLJ31659	FAM218A	474	0	0	*	811	3252	0	0	0	6849	1.07457	0	0	0	0	0	0	0	0	0	0	0	0	0	0	0	0	0	0	0	2672	1.72015	1	3459	0.0890278	0	1	0	0	0	0	4278	0.395609	0	0	0
84792	BC006110	MGC12966	FAM220A	207	0	0	*	2416	1067	5213	1.10949	0	3185	1.57773	1	1	0	0	0	0	2207	1.04853	0	0	0	0	0	0	223	0	0	0	0	0	0	0	1232	0.207442	0	0	0	0	0	0	0	0	0	0	0
203429	BC025725	CXorf50	FAM226A	300	0	0	*	1528	637	0	0	0	0	0	0	0	0	0	0	0	0	0	0	0	0	0	0	0	0	0	0	0	0	0	0	0	0	0	0	0	0	0	0	0	0	0	0	0	0
80227	BC006142	WDR71	PAAF1	1179	0	0	*	3330	1401	3	0	0	4664	1.73511	1	1	0	0	0	0	3612	1.36634	0	0	0	3069	-0.117754	0	7124	2.34623	1	1	0	0	0	0	1467	0.0664119	0	0	0	1755	-0.924051	0	14482	3.36973	1	1	0
375190	BC050462	FLJ30851	FAM228B	621	0	0	*	1927	1024	990	-0.960856	0	0	0	0	0	0	986	-0.966697	0	123	0	0	0	0	0	0	0	0	0	0	0	0	2880	0.579712	0	0	0	0	0	0	782	-1.30112	0	0	0	0	0	0
60343	BC002934	FAM3A	FAM3A	213	0	0	*	4430	3508	0	0	0	78	-5.49103	0	0	0	110	0	0	3396	-0.0468123	0	0	0	1011	-2.13152	0	1412	-1.31291	0	0	0	15	0	0	25	0	0	0	0	0	0	0	0	0	0	0	0
133015	BC023002	MGC29898	PACRGL	666	0	0	*	6301	4319	3000	-1.07062	0	0	0	0	0	0	0	0	0	0	0	0	0	0	0	0	0	16078	1.89632	1	1	0	6544	0.0545919	0	0	0	0	0	0	0	0	0	3530	-0.291029	0	0	0
131177	BC015359	FAM3D	FAM3D	675	0	0	*	1684	3171	1068	-0.65698	0	1933	-0.714096	0	0	0	0	0	0	185	0	0	0	0	3586	1.09048	0	15	0	0	0	0	0	0	0	0	0	0	0	0	0	0	0	0	0	0	0	0
131583	BC039689	FAM43A	FAM43A	1272	0	0	*	158	568	0	0	0	0	0	0	0	0	0	0	0	0	0	0	0	0	0	0	0	0	0	0	0	0	0	0	0	0	0	0	0	0	0	0	0	83	0	0	0	0
5516	BC012022	PPP2CB	PPP2CB	930	0	0	*	50	1239	0	0	0	11	0	0	0	0	0	0	0	9971	3.00856	1	1	0	1	0	0	678	-0.869819	0	0	0	4852	6.60051	1	430	0	0	1	6.60051	0	0	0	0	0	0	0	0
23308	BC064637	ICOSLG	ICOSLG	909	0	0	*	50	1067	854	4.09424	1	0	0	0	1	0	0	0	0	2964	1.47399	0	0	0	0	0	0	0	0	0	0	0	0	0	0	1037	-0.0411443	0	0	0	0	0	0	4763	2.15831	1	1	0
10914	BC000927	PAPOLA	PAPOLA	858	1	0	NA	262	1167	11072	5.40121	1	2689	1.20427	0	1	0	0	0	0	1158	-0.0111693	0	0	0	111	0	0	8306	2.83135	1	1	0	3	0	0	6581	2.4955	1	1	0	1896	2.85532	1	0	0	0	1	0
9060	BC009894	PAPSS2	PAPSS2	1845	0	0	*	795	346	0	0	0	0	0	0	0	0	0	0	0	0	0	0	0	0	0	0	0	2533	2.872	1	1	0	0	0	0	0	0	0	0	0	0	0	0	0	0	0	0	0
79850	BC026023	FAM57A	FAM57A	678	0	0	*	1785	484	3	0	0	0	0	0	0	0	2740	0.618252	0	0	0	0	0	0	0	0	0	0	0	0	0	0	0	0	0	8	0	0	0	0	0	0	0	2686	2.47238	1	1	0
196472	BC031221	MGC39520	FAM71C	726	0	0	*	2740	2157	0	0	0	0	0	0	0	0	8822	1.68693	1	494	0	0	1	0	26	0	0	64	0	0	0	0	0	0	0	0	0	0	0	0	1067	-1.36062	0	0	0	0	0	0
161142	BC050401	C14orf54	FAM71D	1203	0	0	*	3504	1610	45	0	0	0	0	0	0	0	0	0	0	0	0	0	0	0	71	0	0	0	0	0	0	0	2130	-0.718149	0	8657	2.42681	1	1	0	72	0	0	0	0	0	0	0
112703	BC071737	LOC112703	FAM71E1	696	0	0	*	496	59	910	0.875526	0	0	0	0	0	0	0	0	0	2609	5.46664	1	1	0	0	0	0	0	0	0	0	0	461	0	0	0	0	0	0	0	0	0	0	0	0	0	0	0
284418	BC031875	C19orf16	FAM71E2	603	0	0	*	2539	1248	0	0	0	0	0	0	0	0	0	0	0	0	0	0	0	0	0	0	0	0	0	0	0	0	0	0	0	0	0	0	0	0	0	0	0	0	0	0	0	0
143684	BC026013	FAM76B	FAM76B	702	0	0	*	1942	4301	0	0	0	64	-6.07046	0	0	0	877	-1.14689	0	0	0	0	0	0	1722	-0.173458	0	11980	1.47788	0	0	0	32	0	0	7925	0.881739	0	0	0	0	0	0	0	0	0	0	0
286336	BC049388	FAM78A	FAM78A	792	0	0	*	4431	1420	21	0	0	0	0	0	0	0	767	-2.53033	0	1250	-0.183963	0	0	0	0	0	0	1999	0.493388	0	0	0	0	0	0	2216	0.642067	0	0	0	0	0	0	138	0	0	0	0
84985	BC052300	FAM83A	FAM83A	1305	0	0	*	1916	730	4519	1.23791	0	0	0	0	0	0	2904	0.599944	0	0	0	0	0	0	0	0	0	21	0	0	0	0	0	0	0	0	0	0	0	0	0	0	0	0	0	0	0	0
113828	BC011204	FAM83F	FAM83F	999	0	0	*	5213	3155	0	0	0	1816	-0.796876	0	0	0	0	0	0	8258	1.38815	0	0	0	5910	0.181044	0	3741	0.245784	0	0	0	4019	-0.375277	0	9948	1.65677	1	1	0	44	0	0	0	0	0	0	0
55199	BC032519	FLJ10661	FAM86C1	396	0	0	*	3833	4638	5074	0.40465	0	4512	-0.0397358	0	0	0	8329	1.11967	0	0	0	0	0	0	158	0	0	990	-2.228	0	0	0	4623	0.270355	0	7805	0.750896	0	0	0	1198	-1.67785	0	665	-2.80208	0	0	0
23625	BC023991	FAM89B	FAM89B	489	0	0	*	2323	1099	0	0	0	0	0	0	0	0	10520	2.17907	1	0	0	0	1	0	0	0	0	0	0	0	0	0	0	0	0	10375	3.23885	1	1	0	0	0	0	3752	1.77147	1	1	0
55138	BC042608	FAM90A1	FAM90A1	1395	0	0	*	1327	843	0	0	0	0	0	0	0	0	0	0	0	0	0	0	0	0	0	0	0	0	0	0	0	0	742	-0.838677	0	0	0	0	0	0	7780	2.5516	1	0	0	0	1	0
57097	BC031073	PARP11	PARP11	699	0	0	*	1427	50	0	0	0	0	0	0	0	0	0	0	0	0	0	0	0	0	0	0	0	1760	5.1375	1	1	0	0	0	0	0	0	0	0	0	0	0	0	0	0	0	0	0
2176	BC015748	FANCC	FANCC	1677	0	0	*	50	727	0	0	0	0	0	0	0	0	0	0	0	0	0	0	0	0	0	0	0	0	0	0	0	0	0	0	0	0	0	0	0	0	2689	5.749	1	0	0	0	1	0
2177	BC013582	FANCD2	FANCD2	726	1	0	Unknown	3154	3286	0	0	0	0	0	0	0	0	0	0	0	0	0	0	0	0	0	0	0	0	0	0	0	0	0	0	0	0	0	0	0	0	0	0	0	0	0	0	0	0
115795	BC028122	MGC40179	FANCD2OS	534	0	0	*	7140	3542	9003	0.334482	0	10868	1.61745	1	1	0	0	0	0	22196	2.64766	1	1	0	2989	-1.25626	0	0	0	0	0	0	11765	0.720505	0	6617	0.901613	0	0	0	1453	-2.29689	0	11145	1.65376	1	1	0
10039	BC014260	PARP3	PARP3	1602	0	0	*	50	184	0	0	0	0	0	0	0	0	0	0	0	1266	2.7825	1	1	0	0	0	0	743	2.01366	1	1	0	0	0	0	0	0	0	0	0	0	0	0	0	0	0	0	0
2191	BC026250	FAP	FAP	2283	0	0	*	50	200	0	0	0	0	0	0	0	0	0	0	0	0	0	0	0	0	0	0	0	0	0	0	0	0	736	3.87971	1	0	0	0	1	0	0	0	0	0	0	0	0	0
56965	BC026955	PARP6	PARP6	1092	0	0	*	644	952	0	0	0	0	0	0	0	0	438	0	0	0	0	0	0	0	0	0	0	8639	3.18183	1	1	0	0	0	0	6	0	0	0	0	0	0	0	0	0	0	0	0
356	BC017502	FASLG	FASLG	846	0	0	*	50	312	574	3.52105	1	0	0	0	1	0	0	0	0	0	0	0	0	0	0	0	0	0	0	0	0	0	0	0	0	12519	5.32643	1	1	0	0	0	0	0	0	0	0	0
84553	BC011583	C6orf168	FAXC	1230	0	0	*	2596	2871	4898	0.915902	0	0	0	0	0	0	384	0	0	2084	-0.462198	0	0	0	210	0	0	15	0	0	0	0	0	0	0	0	0	0	0	0	0	0	0	0	0	0	0	0
10826	BC007216	C5orf4	FAXDC2	1002	0	0	*	1499	1111	112	0	0	0	0	0	0	0	0	0	0	0	0	0	0	0	0	0	0	0	0	0	0	0	0	0	0	0	0	0	0	0	0	0	0	0	0	0	0	0
85302	BC023549	FBF1	FBF1	2493	0	0	*	80	1192	0	0	0	0	0	0	0	0	0	0	0	0	0	0	0	0	0	0	0	0	0	0	0	0	0	0	0	0	0	0	0	0	0	0	0	0	0	0	0	0
2091	BC019260	FBL	FBL	966	0	0	*	50	122	0	0	0	0	0	0	0	0	0	0	0	0	0	0	0	0	0	0	0	0	0	0	0	0	0	0	0	0	0	0	0	0	0	0	0	0	0	0	0	0
64319	BC014212	FBS1	FBRS	1035	0	0	*	1123	2647	0	0	0	0	0	0	0	0	0	0	0	0	0	0	0	0	0	0	0	5602	1.08158	0	0	0	0	0	0	0	0	0	0	0	0	0	0	0	0	0	0	0
286257	BC002613	LOC286257	PAXX	615	0	0	*	5013	5892	7554	0.591567	0	19462	1.72383	1	1	0	5699	0.185035	0	10172	0.787774	0	0	0	5255	0.0680165	0	18349	1.63887	1	1	0	478	0	0	3767	-0.645341	0	0	0	2947	-0.766427	0	8072	0.454169	0	0	0
80028	BC024256	FBXL18	FBXL18	1098	0	0	*	2135	2163	0	0	0	277	-2.96508	0	0	0	0	0	0	895	-1.27307	0	0	0	0	0	0	0	0	0	0	0	1411	-0.597518	0	0	0	0	0	0	0	0	0	0	0	0	0	0
54620	BC059173	FBXL19	FBXL19	1575	1	1	CxxC	4910	5221	16526	1.75094	1	8449	0.694454	0	1	0	822	-2.57851	0	9231	0.822161	0	0	0	7982	0.701027	0	12007	1.20148	0	0	0	13329	1.44077	0	2780	-0.909241	0	0	0	0	0	0	7656	0.552265	0	0	0
25827	BC031556	FBXL2	FBXL2	1272	0	0	*	1746	1130	0	0	0	802	-0.494649	0	0	0	0	0	0	0	0	0	0	0	774	-1.17365	0	0	0	0	0	0	0	0	0	28	0	0	0	0	0	0	0	2478	1.13285	0	0	0
9817	BC015945	KEAP1	KEAP1	1875	1	0	Unknown	50	580	1508	4.91456	1	0	0	0	1	0	0	0	0	0	0	0	0	0	0	0	0	0	0	0	0	0	0	0	0	2736	2.23794	1	1	0	6493	7.02081	1	0	0	0	1	7.02081
201456	BC029579	FBXO15	FBXO15	1305	0	0	*	2657	412	7797	1.55312	1	596	0.532668	0	1	0	0	0	0	15	0	0	0	0	0	0	0	614	0.575594	0	0	0	3315	0.319211	0	4097	3.31385	1	1	0	4234	0.672223	0	277	0	0	0	0
115290	BC012385	FBXO17	FBXO17	837	0	0	*	397	225	0	0	0	0	0	0	0	0	0	0	0	0	0	0	0	0	0	0	0	0	0	0	0	0	1628	2.03589	1	0	0	0	1	0	0	0	0	0	0	0	0	0
83604	BC039242	TMEM47	TMEM47	546	0	0	*	495	50	0	0	0	0	0	0	0	0	0	0	0	0	0	0	0	0	0	0	0	6005	6.90809	1	1	6.90809	0	0	0	0	0	0	0	0	0	0	0	0	0	0	0	0
26263	BC041691	FBXO22	FBXO22	1212	0	0	*	1116	2010	259	0	0	0	0	0	0	0	1863	0.739291	0	0	0	0	0	0	0	0	0	0	0	0	0	0	0	0	0	0	0	0	0	0	0	0	0	4915	1.29	0	0	0
26260	BC020249	FBXO25	FBXO25	876	0	0	*	3087	2728	0	0	0	12173	2.15777	1	1	0	0	0	0	0	0	0	0	0	0	0	0	0	0	0	0	0	9768	1.66186	1	841	-1.69767	0	1	0	11151	1.8529	1	0	0	0	1	0
5144	BC008390	PDE4D	PDE4D	660	0	0	*	866	1067	2143	1.30719	0	3944	1.8861	1	1	0	986	0.187221	0	0	0	0	0	0	1	0	0	7597	2.83187	1	1	0	1165	0.427891	0	0	0	0	0	0	0	0	0	540	-0.982529	0	0	0
26273	BC046110	FBXO3	FBXO3	1416	0	0	*	657	50	0	0	0	0	0	0	0	0	0	0	0	0	0	0	0	0	0	0	0	0	0	0	0	0	1106	0.751386	0	0	0	0	0	0	0	0	0	1426	4.8339	1	1	0
11231	BC048287	SEC63	SEC63	2283	0	0	*	50	50	5	0	0	0	0	0	0	0	0	0	0	1960	5.29278	1	1	0	0	0	0	2213	5.46793	1	1	0	0	0	0	0	0	0	0	0	0	0	0	3780	6.24031	1	1	6.24031
114907	BC024030	FBXO32	FBXO32	633	0	0	*	2572	1473	4241	0.721514	0	17209	3.54633	1	1	0	0	0	0	3118	1.08186	0	0	0	5422	1.07593	0	0	0	0	0	0	0	0	0	5102	1.79231	1	1	0	0	0	0	0	0	0	0	0
130888	BC017869	FBXO36	FBXO36	270	0	0	*	2391	91	0	0	0	0	0	0	0	0	0	0	0	0	0	0	0	0	0	0	0	0	0	0	0	0	0	0	0	0	0	0	0	0	0	0	0	3461	5.24918	1	1	0
162517	BC034782	FBXO39	FBXO39	1329	0	0	*	3819	958	0	0	0	0	0	0	0	0	0	0	0	0	0	0	0	0	0	0	0	0	0	0	0	0	0	0	0	0	0	0	0	0	0	0	0	0	0	0	0	0
26272	BC048098	FBXO4	FBXO4	1164	0	0	*	50	877	0	0	0	0	0	0	0	0	0	0	0	0	0	0	0	0	0	0	0	0	0	0	0	0	2056	5.36177	1	0	0	0	1	0	0	0	0	291	0	0	0	0
93611	BC007832	FBXO44	FBXO44	675	0	0	*	3735	8052	2397	-0.639878	0	880	-3.19377	0	0	0	0	0	0	525	-3.93896	0	0	0	2413	-0.63028	0	9868	0.293411	0	0	0	0	0	0	7324	-0.136715	0	0	0	0	0	0	0	0	0	0	0
3680	BC030198	ITGA9	ITGA9	1899	0	0	*	50	50	0	0	0	2093	5.3875	1	1	0	3562	6.15462	1	0	0	0	1	6.15462	0	0	0	0	0	0	0	0	0	0	0	2004	5.32481	1	1	0	0	0	0	0	0	0	0	0
26271	BC018905	FBXO5	FBXO5	1344	0	0	*	287	421	0	0	0	0	0	0	0	0	0	0	0	0	0	0	0	0	0	0	0	0	0	0	0	0	0	0	0	0	0	0	0	0	0	0	0	0	0	0	0	0
26270	BC020880	FBXO6	FBXO6	882	0	0	*	1183	2681	0	0	0	0	0	0	0	0	0	0	0	0	0	0	0	0	0	0	0	9	0	0	0	0	0	0	0	1646	-0.703807	0	0	0	0	0	0	235	0	0	0	0
26269	BC040456	FBXO8	FBXO8	837	0	0	*	2131	1570	15455	2.85847	1	0	0	0	1	0	0	0	0	0	0	0	0	0	0	0	0	0	0	0	0	0	0	0	0	0	0	0	0	0	80	0	0	0	0	0	0	0
26190	BC018738	FBXW2	FBXW2	1365	0	0	*	107	1239	0	0	0	0	0	0	0	0	0	0	0	1080	-0.198145	0	0	0	15	0	0	138	0	0	0	0	0	0	0	0	0	0	0	0	0	0	0	0	0	0	0	0
6468	BC007380	FBXW4	FBXW4	879	0	0	*	430	1495	0	0	0	0	0	0	0	0	0	0	0	0	0	0	0	0	0	0	0	0	0	0	0	0	8621	4.32545	1	0	0	0	1	0	0	0	0	0	0	0	0	0
54461	BC000850	FBXW5	FBXW5	480	0	0	*	3801	3914	0	0	0	2451	-0.675273	0	0	0	1699	-1.16169	0	0	0	0	0	0	4650	0.290852	0	373	0	0	0	0	1144	-1.73229	0	6969	0.832308	0	0	0	0	0	0	0	0	0	0	0
2204	BC027953	FCAR	FCAR	864	0	0	*	4292	3517	1455	-1.56063	0	0	0	0	0	0	0	0	0	2254	-0.641858	0	0	0	3062	-0.487176	0	0	0	0	0	0	0	0	0	360	0	0	0	0	6	0	0	0	0	0	0	0
64792	BC004522	RABL5	IFT22	468	0	0	*	50	590	0	0	0	0	0	0	0	0	0	0	0	0	0	0	0	0	0	0	0	0	0	0	0	0	0	0	0	0	0	0	0	0	0	0	0	0	0	0	0	0
2207	BC033872	FCER1G	FCER1G	264	0	0	*	18050	15245	12983	-0.475375	0	19235	0.335398	0	0	0	0	0	0	0	0	0	0	0	5080	-1.8291	0	29665	0.960426	0	0	0	31905	0.821784	0	11602	-0.393963	0	0	0	0	0	0	22457	0.558829	0	0	0
2209	BC032634	FCGR1A	FCGR1A	1125	0	0	*	1180	556	0	0	0	0	0	0	0	0	0	0	0	0	0	0	0	0	0	0	0	0	0	0	0	0	0	0	0	0	0	0	0	0	0	0	0	0	0	0	0	0
2305	BC006192	FOXM1	FOXM1	2247	1	1	Forkhead	50	718	0	0	0	0	0	0	0	0	32986	9.36571	1	0	0	0	1	9.36571	3019	5.916	1	0	0	0	1	0	8967	7.48655	1	0	0	0	1	7.48655	16716	8.38509	1	0	0	0	1	8.38509
5165	BC015948	PDK3	PDK3	1221	0	0	*	1412	1408	0	0	0	0	0	0	0	0	0	0	0	3334	1.24361	0	0	0	0	0	0	4095	1.54022	1	1	0	0	0	0	400	0	0	0	0	0	0	0	7075	2.32908	1	1	0
2214	BC017865	FCGR3A	FCGR3A	765	0	0	*	6735	5911	14203	1.07645	0	4	0	0	0	0	12602	0.903903	0	9323	0.657392	0	0	0	4071	-0.726295	0	3591	-0.719017	0	0	0	0	0	0	210	0	0	0	0	0	0	0	1315	-2.16834	0	0	0
89848	BC047016	FCHSD1	FCHSD1	1230	0	0	*	1050	2038	216	0	0	0	0	0	0	0	1151	0.132499	0	2809	0.462903	0	0	0	1945	0.889381	0	761	-1.42119	0	0	0	349	0	0	4616	1.17949	0	0	0	0	0	0	0	0	0	0	0
79368	BC069185	FCRL2	FCRL2	609	0	0	*	1286	396	0	0	0	0	0	0	0	0	0	0	0	0	0	0	0	0	0	0	0	0	0	0	0	0	0	0	0	0	0	0	0	0	0	0	0	0	0	0	0	0
5170	BC033494	PDPK1	PDPK1	1290	0	0	*	284	250	513	0.853068	0	0	0	0	0	0	0	0	0	0	0	0	0	0	41	0	0	1773	2.82619	1	1	0	0	0	0	567	1.18142	0	0	0	0	0	0	14	0	0	0	0
2224	BC010004	FDPS	FDPS	1260	0	0	*	262	62	0	0	0	0	0	0	0	0	0	0	0	2439	5.29788	1	1	0	0	0	0	0	0	0	0	0	0	0	0	0	0	0	0	0	0	0	0	0	0	0	0	0
5217	BC018049	PFN2	PFN2	423	0	0	*	1904	699	0	0	0	4966	2.82872	1	1	0	0	0	0	0	0	0	0	0	0	0	0	4630	2.72765	1	1	0	0	0	0	0	0	0	0	0	0	0	0	2188	1.64625	1	1	0
2232	BC002960	FDXR	FDXR	1476	0	0	*	2265	1095	0	0	0	6345	2.53469	1	1	0	0	0	0	2084	0.928424	0	0	0	0	0	0	0	0	0	0	0	0	0	0	1297	0.244248	0	0	0	0	0	0	0	0	0	0	0
9638	BC009545	FEZ1	FEZ1	1179	0	0	*	942	971	0	0	0	0	0	0	0	0	0	0	0	5233	2.4301	1	1	0	0	0	0	0	0	0	0	0	0	0	0	0	0	0	0	0	0	0	0	0	0	0	0	0
2865	BC035657	GPR41	FFAR3	1041	0	0	*	126	371	0	0	0	0	0	0	0	0	0	0	0	0	0	0	0	0	0	0	0	0	0	0	0	0	0	0	0	0	0	0	0	0	0	0	0	12308	5.05203	1	1	0
2243	BC020764	FGA	FGA	657	0	0	*	5868	6354	0	0	0	12982	1.03078	0	0	0	0	0	0	5325	-0.254884	0	0	0	0	0	0	0	0	0	0	0	7456	0.345533	0	109	0	0	0	0	0	0	0	0	0	0	0	0
221472	BC062363	FGD2	FGD2	315	0	0	*	4314	7041	10565	1.29219	0	0	0	0	0	0	15342	1.83039	1	15	0	0	1	0	0	0	0	0	0	0	0	0	8333	0.94981	0	0	0	0	0	0	2337	-0.884368	0	20851	1.56626	1	1	0
152273	BC035364	FGD5	FGD5	1623	0	0	*	3025	1124	0	0	0	1710	0.605354	0	0	0	0	0	0	7764	2.78816	1	1	0	0	0	0	0	0	0	0	0	0	0	0	5888	2.38914	1	1	0	0	0	0	0	0	0	0	0
55785	BC013319	FGD6	FGD6	1131	0	0	*	50	66	865	4.1127	1	0	0	0	1	0	0	0	0	0	0	0	0	0	0	0	0	0	0	0	0	0	0	0	0	0	0	0	0	0	0	0	0	0	0	0	0	0
2246	BC032697	FGF1	FGF1	468	0	0	*	445	387	0	0	0	0	0	0	0	0	0	0	0	0	0	0	0	0	0	0	0	0	0	0	0	0	0	0	0	0	0	0	0	0	0	0	0	4721	3.60869	1	1	0
2255	BC069561	FGF10	FGF10	627	0	0	*	2869	2746	0	0	0	13897	2.33937	1	1	0	0	0	0	1019	-1.43018	0	0	0	0	0	0	0	0	0	0	0	4620	0.687345	0	2409	-0.188897	0	0	0	0	0	0	0	0	0	0	0
5224	BC001904	PGAM2	PGAM2	762	0	0	*	1807	2781	11569	2.6786	1	784	-1.82668	0	1	0	21808	3.59319	1	5757	1.04971	0	1	0	3183	0.816791	0	8633	1.63426	1	1	0	73	0	0	10876	1.96747	1	1	0	6150	1.76699	1	2174	-0.355252	0	1	0
26291	BC018404	FGF21	FGF21	630	0	0	*	3062	3954	0	0	0	0	0	0	0	0	0	0	0	0	0	0	0	0	0	0	0	0	0	0	0	0	0	0	0	4982	0.333412	0	0	0	0	0	0	13942	1.81805	1	1	0
8074	BC069333	FGF23	FGF23	756	0	0	*	372	1089	0	0	0	0	0	0	0	0	0	0	0	0	0	0	0	0	416	0	0	0	0	0	0	0	0	0	0	2850	1.38796	0	0	0	0	0	0	0	0	0	0	0
9982	BC003628	FGFBP1	FGFBP1	705	0	0	*	3931	4737	0	0	0	0	0	0	0	0	3178	-0.306777	0	0	0	0	0	0	16	0	0	6424	0.439498	0	0	0	862	-2.18914	0	6	0	0	0	0	6	0	0	11062	1.22357	0	0	0
83888	BC025720	KSP37	FGFBP2	672	0	0	*	3170	7303	0	0	0	0	0	0	0	0	0	0	0	0	0	0	0	0	0	0	0	0	0	0	0	0	0	0	0	6994	-0.0623714	0	0	0	0	0	0	0	0	0	0	0
11116	BC011902	FGFR1OP	FGFR1OP	1140	0	0	*	341	1117	21	0	0	0	0	0	0	0	0	0	0	0	0	0	0	0	278	0	0	0	0	0	0	0	0	0	0	6184	2.46891	1	1	0	0	0	0	0	0	0	0	0
26127	BC032143	FGFR1OP2	FGFR1OP2	519	0	0	*	775	2412	29	0	0	8598	1.83377	1	1	0	0	0	0	5711	1.24351	0	0	0	241	0	0	3304	0.453984	0	0	0	0	0	0	4273	0.825019	0	0	0	0	0	0	0	0	0	0	0
53834	BC036769	FGFRL1	FGFRL1	1515	0	0	*	1104	1828	0	0	0	0	0	0	0	0	0	0	0	0	0	0	0	0	919	-0.264603	0	4135	1.17762	0	0	0	0	0	0	3186	0.80148	0	0	0	0	0	0	0	0	0	0	0
25796	BC014006	PGLS	PGLS	777	0	0	*	2989	4113	0	0	0	3373	-0.286159	0	0	0	0	0	0	2593	-0.665569	0	0	0	792	-1.91609	0	14639	1.83155	1	1	0	0	0	0	10157	1.30421	0	0	0	0	0	0	9124	1.14948	0	0	0
5261	BC002541	PHKG2	PHKG2	1221	0	0	*	609	1314	0	0	0	0	0	0	0	0	14137	4.53689	1	864	-0.604862	0	1	0	0	0	0	5122	1.96274	1	1	0	0	0	0	0	0	0	0	0	0	0	0	3627	1.46481	0	0	0
2271	BC003108	FH	FH	1533	0	0	*	75	240	0	0	0	0	0	0	0	0	0	0	0	0	0	0	0	0	0	0	0	0	0	0	0	0	0	0	0	0	0	0	0	0	0	0	0	0	0	0	0	0
84457	BC011268	PHYHIPL	PHYHIPL	993	0	0	*	2623	2653	0	0	0	10598	1.9981	1	1	0	0	0	0	4029	0.602797	0	0	0	5	0	0	11900	2.16526	1	1	0	0	0	0	18381	2.79252	1	1	0	0	0	0	1481	-0.841053	0	0	0
2273	BC010998	FHL1	FHL1	843	1	1	NA	3200	6694	1973	-0.697681	0	15280	1.1907	0	0	0	0	0	0	8335	0.316314	0	0	0	2122	-0.592647	0	15632	1.22356	0	0	0	10727	1.7451	1	9059	0.436483	0	1	0	0	0	0	22900	1.77441	1	1	0
2275	BC001351	FHL3	FHL3	843	0	0	*	1017	3280	1489	0.550024	0	27630	3.07447	1	1	0	1315	0.370743	0	0	0	0	0	0	0	0	0	5467	0.737054	0	0	0	3253	1.67745	1	39	0	0	1	0	0	0	0	4430	0.433611	0	0	0
113791	BC011049	MGC17330	PIK3IP1	792	0	0	*	3091	677	6769	1.13087	0	0	0	0	0	0	0	0	0	12318	4.18547	1	1	0	0	0	0	11038	4.02718	1	1	0	0	0	0	0	0	0	0	0	0	0	0	1952	1.52773	1	1	0
9158	BC014388	FIBP	FIBP	1074	0	0	*	1963	1314	0	0	0	0	0	0	0	0	0	0	0	0	0	0	0	0	0	0	0	0	0	0	0	0	0	0	0	9842	2.90499	1	1	0	0	0	0	0	0	0	0	0
51024	BC003540	TTC11	FIS1	459	0	0	*	674	1913	2899	2.10473	1	0	0	0	1	0	0	0	0	4831	1.33648	0	0	0	0	0	0	0	0	0	0	0	0	0	0	11175	2.54637	1	1	0	2479	1.87894	1	845	-1.17881	0	1	0
2288	BC001786	FKBP4	FKBP4	1380	0	0	*	1177	696	0	0	0	0	0	0	0	0	0	0	0	15	0	0	0	0	0	0	0	0	0	0	0	0	0	0	0	0	0	0	0	0	0	0	0	457	0	0	0	0
360132	BC011872	FKBP9L	FKBP9P1	429	0	0	*	3210	1476	0	0	0	0	0	0	0	0	0	0	0	8613	2.54482	1	1	0	0	0	0	0	0	0	0	0	9	0	0	11641	2.97945	1	1	0	2504	-0.358339	0	7546	2.35402	1	1	0
63943	BC011966	FKBPL	FKBPL	1050	0	0	*	50	746	0	0	0	0	0	0	0	0	0	0	0	0	0	0	0	0	0	0	0	0	0	0	0	0	0	0	0	0	0	0	0	0	0	0	0	0	0	0	0	0
80308	BC032323	FLAD1	FLAD1	1473	0	0	*	50	980	2747	5.77979	1	0	0	0	1	0	0	0	0	7687	2.97157	1	1	0	0	0	0	1403	0.517661	0	0	0	0	0	0	0	0	0	0	0	1400	4.80735	1	0	0	0	1	0
201163	BC015687	FLCN	FLCN	1029	0	0	*	1151	821	0	0	0	0	0	0	0	0	0	0	0	0	0	0	0	0	0	0	0	0	0	0	0	0	0	0	0	0	0	0	0	0	0	0	0	0	0	0	0	0
644316	BC057848	FLJ43315	FLJ43315	213	0	0	*	11663	9310	0	0	0	0	0	0	0	0	0	0	0	3056	-1.60714	0	0	0	1018	-3.51813	0	235	0	0	0	0	0	0	0	2521	-1.88479	0	0	0	0	0	0	0	0	0	0	0
2319	BC003683	FLOT2	FLOT2	1158	0	0	*	125	328	0	0	0	0	0	0	0	0	0	0	0	3982	3.60173	1	1	0	0	0	0	0	0	0	0	0	0	0	0	1034	1.65647	1	1	0	0	0	0	7698	4.55272	1	1	0
64979	BC020642	MRPL36	MRPL36	312	0	0	*	50	2116	20618	8.68776	1	4487	1.08441	0	1	8.68776	0	0	0	0	0	0	0	0	0	0	0	0	0	0	0	0	0	0	0	3	0	0	0	0	0	0	0	0	0	0	0	0
51268	BC008960	PIPOX	PIPOX	1173	0	0	*	394	50	3545	3.16952	1	0	0	0	1	0	0	0	0	0	0	0	0	0	0	0	0	902	4.17313	1	1	0	0	0	0	0	0	0	0	0	0	0	0	0	0	0	0	0
114793	BC036492	FMNL2	FMNL2	537	1	0	Unknown	3026	2921	21	0	0	8754	1.58348	1	1	0	0	0	0	14741	2.3353	1	1	0	0	0	0	0	0	0	0	0	11648	1.9446	1	0	0	0	1	0	5786	0.935154	0	831	-1.81354	0	0	0
23760	BC031427	PITPNB	PITPNB	819	0	0	*	4822	259	0	0	0	0	0	0	0	0	0	0	0	0	0	0	0	0	0	0	0	1198	2.2096	1	1	0	0	0	0	824	1.66969	1	1	0	0	0	0	0	0	0	0	0
6541	BC063303	SLC7A1	SLC7A1	1890	0	0	*	719	50	0	0	0	0	0	0	0	0	0	0	0	0	0	0	0	0	0	0	0	3655	6.1918	1	1	6.1918	0	0	0	0	0	0	0	0	0	0	0	0	0	0	0	0
158521	BC034320	FMR1NB	FMR1NB	768	0	0	*	680	1280	0	0	0	0	0	0	0	0	0	0	0	0	0	0	0	0	0	0	0	978	-0.388237	0	0	0	0	0	0	0	0	0	0	0	0	0	0	1869	0.546123	0	0	0
64122	BC042680	FN3K	FN3K	930	0	0	*	375	824	0	0	0	0	0	0	0	0	0	0	0	0	0	0	0	0	0	0	0	0	0	0	0	0	0	0	0	53	0	0	0	0	0	0	0	0	0	0	0	0
79672	BC014408	FN3KRP	FN3KRP	930	0	0	*	812	746	3118	1.94107	1	0	0	0	1	0	0	0	0	0	0	0	0	0	0	0	0	0	0	0	0	0	0	0	0	0	0	0	0	0	0	0	0	0	0	0	0	0
79025	BC000912	MGC5356	FNDC11	957	0	0	*	125	624	0	0	0	0	0	0	0	0	0	0	0	0	0	0	0	0	0	0	0	0	0	0	0	0	346	0	0	0	0	0	0	0	0	0	0	0	0	0	0	0
64778	BC012204	FNDC3B	FNDC3B	204	0	0	*	3443	3717	5936	0.785825	0	19405	2.38422	1	1	0	658	-2.38751	0	14509	1.96474	1	1	0	660	-2.38313	0	0	0	0	0	0	4159	0.272571	0	26717	2.84555	1	1	0	6	0	0	0	0	0	0	0
252995	BC062297	FNDC5	FNDC5	462	0	0	*	1188	1676	0	0	0	0	0	0	0	0	0	0	0	0	0	0	0	0	158	0	0	0	0	0	0	0	0	0	0	925	-0.857497	0	0	0	0	0	0	0	0	0	0	0
96459	BC001956	KIAA1961	FNIP1	1527	0	0	*	496	259	0	0	0	0	0	0	0	0	0	0	0	0	0	0	0	0	0	0	0	0	0	0	0	0	0	0	0	0	0	0	0	0	499	0	0	0	0	0	0	0
55709	BC002736	KBTBD4	KBTBD4	1557	0	0	*	50	2253	0	0	0	0	0	0	0	0	0	0	0	0	0	0	0	0	0	0	0	0	0	0	0	0	0	0	0	0	0	0	0	0	0	0	0	748	-1.59074	0	0	0
123811	BC022321	FLJ31153	FOPNL	525	0	0	*	171	487	0	0	0	0	0	0	0	0	1151	2.75082	1	0	0	0	1	0	0	0	0	520	0.0945899	0	0	0	0	0	0	0	0	0	0	0	0	0	0	0	0	0	0	0
58473	BC008075	PLEKHB1	PLEKHB1	570	0	0	*	1423	2550	1404	-0.0193927	0	0	0	0	0	0	822	-0.791725	0	185	0	0	0	0	2623	0.882282	0	10907	2.09669	1	1	0	0	0	0	5002	0.972008	0	0	0	1824	0.35817	0	15493	2.60305	1	1	0
3169	BC033890	FOXA1	FOXA1	1419	1	1	Forkhead	624	434	435	0	0	14776	5.08942	1	1	0	0	0	0	0	0	0	0	0	1041	0.738352	0	807	0.894874	0	0	0	0	0	0	0	0	0	0	0	0	0	0	0	0	0	0	0
10945	BC018778	KDELR1	KDELR1	639	0	0	*	50	1716	0	0	0	0	0	0	0	0	3288	6.03914	1	309	0	0	1	6.03914	0	0	0	0	0	0	0	0	0	0	0	7710	2.16768	1	1	0	0	0	0	0	0	0	0	0
11035	BC041668	RIPK3	RIPK3	522	1	0	Unknown	50	1376	10170	7.66818	1	0	0	0	1	7.66818	6849	7.09782	1	0	0	0	1	7.09782	3720	6.21723	1	0	0	0	1	6.21723	11363	7.8282	1	0	0	0	1	7.8282	8154	7.34944	1	0	0	0	1	7.34944
3035	BC011807	HARS	HARS	1530	0	0	*	50	811	29	0	0	0	0	0	0	0	0	0	0	0	0	0	0	0	0	0	0	0	0	0	0	0	0	0	0	0	0	0	0	0	9102	7.50811	1	0	0	0	1	7.50811
10687	BC062301	PNMA2	PNMA2	1095	0	0	*	50	1601	0	0	0	0	0	0	0	0	0	0	0	7085	2.14579	1	1	0	0	0	0	6784	2.08316	1	1	0	0	0	0	9610	2.58556	1	1	0	0	0	0	0	0	0	0	0
10228	BC009944	STX6	STX6	768	0	0	*	130	106	0	0	0	0	0	0	0	0	0	0	0	0	0	0	0	0	0	0	0	8560	6.33547	1	1	6.33547	0	0	0	0	0	0	0	0	0	0	0	1814	4.09704	1	1	0
55863	BC038933	HT007	TMEM126B	603	0	0	*	50	50	0	0	0	0	0	0	0	0	0	0	0	0	0	0	0	0	0	0	0	6014	6.91025	1	1	6.91025	0	0	0	0	0	0	0	0	3	0	0	0	0	0	0	0
64745	BC005053	FLJ20859	METTL17	1344	0	0	*	50	50	0	0	0	0	0	0	0	0	932	4.22033	1	0	0	0	1	0	0	0	0	1384	4.79077	1	1	0	0	0	0	0	0	0	0	0	0	0	0	0	0	0	0	0
84892	BC060861	AGO61	POMGNT2	1743	0	0	*	873	371	3753	2.10399	1	0	0	0	1	0	0	0	0	0	0	0	0	0	0	0	0	2206	2.57194	1	1	0	3097	1.82682	1	0	0	0	1	0	0	0	0	3046	3.03742	1	1	0
2357	BC005315	FPR1	FPR1	1053	0	0	*	573	178	0	0	0	0	0	0	0	0	0	0	0	0	0	0	0	0	0	0	0	0	0	0	0	0	0	0	0	0	0	0	0	0	0	0	0	0	0	0	0	0
2444	BC012916	FRK	FRK	1518	0	0	*	948	421	0	0	0	0	0	0	0	0	0	0	0	0	0	0	0	0	0	0	0	0	0	0	0	0	0	0	0	0	0	0	0	0	0	0	0	0	0	0	0	0
257019	BC023560	FRMD3	FRMD3	642	0	0	*	3668	3302	376	0	0	4	0	0	0	0	8822	1.26611	0	93	0	0	0	0	1218	-1.59048	0	1213	-1.44476	0	0	0	950	-1.94899	0	6	0	0	0	0	0	0	0	8916	1.43306	0	0	0
122786	BC020521	FRMD6	FRMD6	1845	0	0	*	2017	889	0	0	0	2266	1.34989	0	0	0	0	0	0	0	0	0	0	0	0	0	0	0	0	0	0	0	3068	0.605087	0	0	0	0	0	0	0	0	0	3530	1.98941	1	1	0
29999	BC035606	FSCN3	FSCN3	1497	0	0	*	50	4341	0	0	0	0	0	0	0	0	2575	5.6865	1	0	0	0	1	0	4	0	0	0	0	0	0	0	0	0	0	0	0	0	0	0	3	0	0	0	0	0	0	0
161835	BC045191	FSIP1	FSIP1	1746	0	0	*	174	1726	0	0	0	0	0	0	0	0	0	0	0	0	0	0	0	0	0	0	0	0	0	0	0	0	0	0	0	0	0	0	0	0	0	0	0	0	0	0	0	0
11167	BC000055	FSTL1	FSTL1	927	0	0	*	2384	272	0	0	0	0	0	0	0	0	0	0	0	0	0	0	0	0	0	0	0	0	0	0	0	0	0	0	0	0	0	0	0	0	1314	-0.859419	0	0	0	0	0	0
10775	BC004438	POP4	POP4	663	0	0	*	2994	2210	0	0	0	0	0	0	0	0	5644	0.914644	0	0	0	0	0	0	0	0	0	10635	2.2667	1	1	0	0	0	0	3121	0.497962	0	0	0	0	0	0	0	0	0	0	0
2512	BC016715	FTL	FTL	528	0	0	*	973	6878	0	0	0	0	0	0	0	0	0	0	0	0	0	0	0	0	2386	1.29408	0	0	0	0	0	0	0	0	0	2020	-1.76763	0	0	0	36	0	0	0	0	0	0	0
94033	BC034419	FTMT	FTMT	729	0	0	*	3896	755	0	0	0	0	0	0	0	0	0	0	0	1266	0.745729	0	0	0	0	0	0	0	0	0	0	0	0	0	0	1911	1.33978	0	0	0	0	0	0	0	0	0	0	0
24140	BC023584	FTSJ1	FTSJ1	990	0	0	*	3974	1944	0	0	0	0	0	0	0	0	0	0	0	0	0	0	0	0	2311	-0.782075	0	1091	-0.833377	0	0	0	0	0	0	0	0	0	0	0	0	0	0	0	0	0	0	0
6223	BC000023	RPS19	RPS19	438	0	0	*	892	59	6441	2.85217	1	0	0	0	1	0	7836	3.135	1	1297	4.45832	1	2	4.45832	0	0	0	5318	6.49403	1	1	6.49403	0	0	0	0	0	0	0	0	0	0	0	0	0	0	0	0
2519	BC003060	FUCA2	FUCA2	1404	0	0	*	1631	490	21	0	0	0	0	0	0	0	0	0	0	0	0	0	0	0	0	0	0	0	0	0	0	0	0	0	0	0	0	0	0	0	0	0	0	360	0	0	0	0
139341	BC035015	FUNDC1	FUNDC1	468	0	0	*	1359	1760	0	0	0	1408	-0.321928	0	0	0	0	0	0	0	0	0	0	0	0	0	0	0	0	0	0	0	0	0	0	3026	0.781837	0	0	0	0	0	0	0	0	0	0	0
90488	BC020522	MGC17943	TMEM263	351	0	0	*	720	50	0	0	0	0	0	0	0	0	5205	2.85383	1	0	0	0	1	0	0	0	0	11271	7.81647	1	1	7.81647	0	0	0	0	0	0	0	0	0	0	0	0	0	0	0	0
51304	BC015467	ZDHHC3	ZDHHC3	900	0	0	*	884	50	0	0	0	0	0	0	0	0	0	0	0	0	0	0	0	0	0	0	0	5455	6.76951	1	1	6.76951	0	0	0	0	0	0	0	0	0	0	0	0	0	0	0	0
10690	BC036101	FUT9	FUT9	1080	0	0	*	1904	1876	0	0	0	0	0	0	0	0	0	0	0	5233	1.47998	0	0	0	0	0	0	0	0	0	0	0	0	0	0	0	0	0	0	0	0	0	0	0	0	0	0	0
80199	BC010092	FLJ22688	FUZ	810	0	0	*	1424	1888	0	0	0	0	0	0	0	0	0	0	0	0	0	0	0	0	0	0	0	0	0	0	0	0	0	0	0	0	0	0	0	0	0	0	0	0	0	0	0	0
2395	BC048097	FXN	FXN	633	0	0	*	872	715	0	0	0	4703	2.71757	1	1	0	0	0	0	139	0	0	0	0	0	0	0	1158	0.69562	0	0	0	0	0	0	0	0	0	0	0	0	0	0	152	0	0	0	0
486	BC005302	FXYD2	FXYD2	195	0	0	*	1000	2515	0	0	0	4075	0.696242	0	0	0	0	0	0	0	0	0	0	0	2816	1.49365	0	0	0	0	0	0	3482	1.79992	1	0	0	0	1	0	0	0	0	5815	1.20922	0	0	0
51535	BC039832	PPHLN1	PPHLN1	777	0	0	*	741	1757	0	0	0	0	0	0	0	0	0	0	0	0	0	0	0	0	0	0	0	6390	1.8627	1	1	0	0	0	0	3197	0.863605	0	0	0	0	0	0	0	0	0	0	0
53828	BC054876	FXYD4	FXYD4	270	0	0	*	8304	7715	5106	-0.701613	0	10641	0.463896	0	0	0	0	0	0	0	0	0	0	0	2524	-1.71809	0	3863	-0.997944	0	0	0	971	-3.09626	0	0	0	0	0	0	3	0	0	0	0	0	0	0
53827	BC009642	FXYD5	FXYD5	537	0	0	*	6041	1155	0	0	0	0	0	0	0	0	2247	-1.42679	0	0	0	0	0	0	68	0	0	0	0	0	0	0	0	0	0	5726	2.30963	1	1	0	0	0	0	263	0	0	0	0
53826	BC018652	FXYD6	FXYD6	288	0	0	*	5051	3483	0	0	0	82	-5.40856	0	0	0	658	-2.94041	0	0	0	0	0	0	0	0	0	0	0	0	0	0	0	0	0	0	0	0	0	0	0	0	0	0	0	0	0	0
53822	BC018619	FXYD7	FXYD7	243	0	0	*	372	2622	0	0	0	0	0	0	0	0	0	0	0	3133	0.256877	0	0	0	0	0	0	0	0	0	0	0	0	0	0	0	0	0	0	0	0	0	0	471	0	0	0	0
54886	BC022465	PRG-3	PLPPR1	978	0	0	*	50	3405	0	0	0	2749	-0.308748	0	0	0	0	0	0	7116	1.06341	0	0	0	0	0	0	0	0	0	0	0	4239	6.40565	1	6078	0.835942	0	1	6.40565	0	0	0	0	0	0	0	0
84248	BC035006	FYTTD1	FYTTD1	957	0	0	*	2357	683	0	0	0	0	0	0	0	0	0	0	0	0	0	0	0	0	0	0	0	0	0	0	0	0	0	0	0	0	0	0	0	0	0	0	0	0	0	0	0	0
51343	BC013413	FZR1	FZR1	1482	0	0	*	1864	4126	0	0	0	607	-2.76498	0	0	0	1918	0.0412009	0	0	0	0	0	0	1644	-0.181192	0	0	0	0	0	0	0	0	0	109	0	0	0	0	2983	0.678362	0	595	-2.79378	0	0	0
50486	BC009694	G0S2	G0S2	312	0	0	*	5796	4219	0	0	0	142	-4.89294	0	0	0	55	0	0	0	0	0	0	0	0	0	0	165	0	0	0	0	3080	-0.912127	0	5077	0.267075	0	0	0	3993	-0.537585	0	3475	-0.279888	0	0	0
2539	BC000337	G6PD	G6PD	1548	0	0	*	1162	1202	0	0	0	1713	0.511088	0	0	0	0	0	0	0	0	0	0	0	0	0	0	0	0	0	0	0	0	0	0	0	0	0	0	0	0	0	0	0	0	0	0	0
11345	BC014594	GABARAPL2	GABARAPL2	354	0	0	*	18089	19081	4978	-1.86147	0	32773	0.780371	0	0	0	45150	1.31961	0	42494	1.15512	0	0	0	17890	-0.0159593	0	34637	0.860177	0	0	0	126	0	0	20664	0.114983	0	0	0	8	0	0	49815	1.38444	0	0	0
147699	BC062452	PPM1N	PPM1N	339	0	0	*	1347	1741	0	0	0	0	0	0	0	0	0	0	0	0	0	0	0	0	0	0	0	6803	1.96625	1	1	0	0	0	0	0	0	0	0	0	0	0	0	0	0	0	0	0
8795	BC001281	TNFRSF10B	TNFRSF10B	1323	0	0	*	276	50	21	0	0	0	0	0	0	0	2685	3.28218	1	6190	6.95187	1	2	6.95187	0	0	0	6561	7.03584	1	1	7.03584	0	0	0	1489	4.89627	1	1	0	6471	4.55125	1	0	0	0	1	0
9649	BC033708	RALGPS1	RALGPS1	1155	0	0	*	1290	50	0	0	0	0	0	0	0	0	0	0	0	0	0	0	0	0	2987	1.21133	0	2442	5.60999	1	1	0	0	0	0	0	0	0	0	0	0	0	0	0	0	0	0	0
6938	BC050556	TCF12	TCF12	2121	1	1	bHLH	50	424	10434	7.70515	1	0	0	0	1	7.70515	20274	8.66349	1	0	0	0	1	8.66349	13770	8.10538	1	0	0	0	1	8.10538	4963	6.63314	1	0	0	0	1	6.63314	21757	8.76534	1	0	0	0	1	8.76534
2563	BC033801	GABRD	GABRD	1359	0	0	*	2111	2531	1372	-0.621646	0	11	0	0	0	0	274	0	0	0	0	0	0	0	0	0	0	0	0	0	0	0	0	0	0	170	0	0	0	0	3843	0.864306	0	0	0	0	0	0
81566	BC017221	C12orf22	CSRNP2	1632	1	1	Unknown	50	50	0	0	0	0	0	0	0	0	493	0	0	0	0	0	0	0	4302	6.42694	1	0	0	0	1	6.42694	11261	7.81519	1	0	0	0	1	7.81519	5989	6.90424	1	0	0	0	1	6.90424
2571	BC037780	GAD1	GAD1	1785	0	0	*	2506	624	0	0	0	0	0	0	0	0	10247	2.03174	1	0	0	0	1	0	0	0	0	0	0	0	0	0	0	0	0	0	0	0	0	0	33	0	0	0	0	0	0	0
1647	BC011757	GADD45A	GADD45A	498	1	1	Unknown	1291	5046	10365	3.00516	1	0	0	0	1	0	0	0	0	0	0	0	0	0	1	0	0	0	0	0	0	0	0	0	0	0	0	0	0	0	0	0	0	0	0	0	0	0
26749	BC018052	GAGE8	GAGE2E	351	0	0	*	4200	6042	10936	1.38062	0	0	0	0	0	0	1589	-1.40227	0	7888	0.384633	0	0	0	0	0	0	257	0	0	0	0	19720	2.2312	1	9001	0.575059	0	1	0	0	0	0	2631	-1.19941	0	0	0
2577	BC024914	GAGE5	GAGE5	354	0	0	*	8111	7256	0	0	0	0	0	0	0	0	0	0	0	9400	0.373486	0	0	0	7608	-0.0923625	0	0	0	0	0	0	13992	0.78665	0	2140	-1.76156	0	0	0	22749	1.48785	0	6133	-0.242582	0	0	0
148327	BC038962	CREB3L4	CREB3L4	1188	1	1	bZIP	50	84	0	0	0	0	0	0	0	0	4219	6.39883	1	0	0	0	1	6.39883	9891	7.62804	1	0	0	0	1	7.62804	7764	7.27873	1	0	0	0	1	7.27873	2407	5.58916	1	0	0	0	1	0
51083	BC030241	GAL	GAL	372	0	0	*	1293	1070	307	0	0	0	0	0	0	0	0	0	0	0	0	0	0	0	0	0	0	0	0	0	0	0	0	0	0	3166	1.56505	1	1	0	0	0	0	0	0	0	0	0
9514	BC014649	GAL3ST1	GAL3ST1	1272	0	0	*	1160	815	4260	1.87673	1	0	0	0	1	0	0	0	0	0	0	0	0	0	11	0	0	1883	1.20816	0	0	0	0	0	0	0	0	0	0	0	25	0	0	0	0	0	0	0
7376	BC007790	NR1H2	NR1H2	1386	1	1	Nuclear receptor	1678	81	0	0	0	0	0	0	0	0	0	0	0	0	0	0	0	0	0	0	0	7729	6.57622	1	1	6.57622	0	0	0	0	0	0	0	0	0	0	0	0	0	0	0	0
2585	BC005141	GALK2	GALK2	1377	0	0	*	1428	696	0	0	0	0	0	0	0	0	0	0	0	0	0	0	0	0	0	0	0	1332	0.936435	0	0	0	0	0	0	0	0	0	0	0	4284	1.58496	1	0	0	0	1	0
2588	BC050684	GALNS	GALNS	1569	0	0	*	1134	5883	0	0	0	0	0	0	0	0	0	0	0	0	0	0	0	0	0	0	0	0	0	0	0	0	4535	1.99968	1	28	0	0	1	0	5179	2.19125	1	2229	-1.40016	0	1	0
55568	BC050333	GALNT10	GALNT10	609	0	0	*	3005	2465	0	0	0	0	0	0	0	0	0	0	0	0	0	0	0	0	0	0	0	3603	0.547611	0	0	0	0	0	0	0	0	0	0	0	0	0	0	0	0	0	0	0
79695	BC013945	GALNT12	GALNT12	819	0	0	*	1095	949	0	0	0	9630	3.34306	1	1	0	0	0	0	0	0	0	0	0	115	0	0	0	0	0	0	0	4001	1.86943	1	0	0	0	1	0	0	0	0	0	0	0	0	0
2596	BC007936	GAP43	GAP43	717	0	0	*	2441	715	0	0	0	0	0	0	0	0	0	0	0	0	0	0	0	0	0	0	0	0	0	0	0	0	0	0	0	0	0	0	0	0	0	0	0	0	0	0	0	0
54433	BC003413	NOLA1	GAR1	654	0	0	*	223	2456	3	0	0	4395	0.839553	0	0	0	0	0	0	1080	-1.18528	0	0	0	0	0	0	3304	0.427903	0	0	0	0	0	0	0	0	0	0	0	0	0	0	1121	-1.13152	0	0	0
84885	BC048251	ZDHHC12	ZDHHC12	969	0	0	*	1730	50	0	0	0	0	0	0	0	0	0	0	0	0	0	0	0	0	0	0	0	4602	6.52419	1	1	6.52419	0	0	0	0	0	0	0	0	0	0	0	0	0	0	0	0
2520	BC069724	GAST	GAST	306	0	0	*	9460	15845	7487	-0.337452	0	5551	-1.51321	0	0	0	3562	-1.40915	0	13722	-0.207537	0	0	0	3	0	0	6182	-1.35788	0	0	0	0	0	0	215	0	0	0	0	0	0	0	858	-4.20691	0	0	0
23532	BC022008	PRAME	PRAME	1530	0	0	*	4224	1610	1255	-1.75092	0	14727	3.19333	1	1	0	0	0	0	4214	1.38813	0	0	0	3	0	0	6962	2.11244	1	1	0	82	0	0	0	0	0	0	0	9779	1.21108	0	0	0	0	0	0
2625	BC006793	GATA3	GATA3	1335	1	1	GATA	1719	842	0	0	0	777	-0.115906	0	0	0	1644	-0.0643592	0	1019	0.275262	0	0	0	0	0	0	489	0	0	0	0	4702	1.4517	0	0	0	0	0	0	0	0	0	0	0	0	0	0
84937	BC007235	ZNRF1	ZNRF1	684	1	0	NA	66	50	61	0	0	0	0	0	0	0	0	0	0	0	0	0	0	0	0	0	0	1030	4.36457	1	1	0	0	0	0	408	0	0	0	0	0	0	0	0	0	0	0	0
5052	BC007063	PRDX1	PRDX1	600	0	0	*	1582	2578	101	0	0	0	0	0	0	0	0	0	0	0	0	0	0	0	3284	1.0537	0	9455	1.87483	1	1	0	2883	0.865821	0	7288	1.49927	0	0	0	0	0	0	0	0	0	0	0
2564	BC059376	GABRE	GABRE	1098	0	0	*	50	50	0	0	0	0	0	0	0	0	0	0	0	0	0	0	0	0	0	0	0	0	0	0	0	0	0	0	0	0	0	0	0	0	0	0	0	0	0	0	0	0
8209	BC003587	C21orf33	GATD3A	807	0	0	*	2174	1258	0	0	0	0	0	0	0	0	0	0	0	0	0	0	0	0	1205	-0.851319	0	0	0	0	0	0	6157	1.50188	1	0	0	0	1	0	0	0	0	941	-0.418865	0	0	0
137994	BC029541	LETM2	LETM2	735	0	0	*	50	97	0	0	0	0	0	0	0	0	0	0	0	0	0	0	0	0	7	0	0	0	0	0	0	0	0	0	0	0	0	0	0	0	0	0	0	0	0	0	0	0
2629	BC000349	GBA	GBA	1080	0	0	*	1836	1195	0	0	0	0	0	0	0	0	0	0	0	0	0	0	0	0	0	0	0	0	0	0	0	0	0	0	0	0	0	0	0	0	0	0	0	0	0	0	0	0
57733	BC029362	GBA3	GBA3	489	0	0	*	6412	9840	0	0	0	3965	-1.31134	0	0	0	2685	-1.25585	0	0	0	0	0	0	0	0	0	7863	-0.323578	0	0	0	7169	0.160997	0	0	0	0	0	0	0	0	0	5538	-0.829293	0	0	0
5621	BC012844	PRNP	PRNP	762	1	0	Unknown	1040	393	0	0	0	0	0	0	0	0	0	0	0	0	0	0	0	0	27	0	0	10045	4.6758	1	1	0	0	0	0	0	0	0	0	0	0	0	0	0	0	0	0	0
79056	BC063393	PRRG4	PRRG4	681	0	0	*	8278	3258	0	0	0	0	0	0	0	0	0	0	0	0	0	0	0	0	0	0	0	14840	2.18743	1	1	0	0	0	0	0	0	0	0	0	0	0	0	0	0	0	0	0
2730	BC041809	GCLM	GCLM	825	0	0	*	50	178	681	3.76765	1	0	0	0	1	0	0	0	0	1466	3.04194	1	1	0	0	0	0	0	0	0	0	0	21	0	0	0	0	0	0	0	0	0	0	0	0	0	0	0
9245	BC017032	GCNT3	GCNT3	1317	0	0	*	647	253	0	0	0	0	0	0	0	0	0	0	0	3411	3.75299	1	1	0	19	0	0	3	0	0	0	0	0	0	0	0	0	0	0	0	58	0	0	0	0	0	0	0
148823	BC024174	C1orf150	GCSAML	408	0	0	*	716	1276	7319	3.35362	1	0	0	0	1	0	0	0	0	62	0	0	0	0	274	0	0	0	0	0	0	0	0	0	0	0	0	0	0	0	0	0	0	0	0	0	0	0
55660	BC027178	FNBP3	PRPF40A	648	0	0	*	50	1963	5	0	0	85	-4.52945	0	0	0	16603	8.3753	1	0	0	0	1	8.3753	0	0	0	5363	1.44998	0	0	0	0	0	0	0	0	0	0	0	707	3.82171	1	0	0	0	1	0
23300	BC002701	ASCIZ	ATMIN	2004	1	1	C2H2 ZF	50	303	1009	4.33485	1	0	0	0	1	0	1041	4.3799	1	0	0	0	1	0	13227	8.04734	1	0	0	0	1	8.04734	9818	7.61736	1	0	0	0	1	7.61736	33834	9.40233	1	0	0	0	1	9.40233
8200	BC032495	GDF5	GDF5	1506	0	0	*	2690	958	6017	1.16144	0	0	0	0	0	0	10959	2.02644	1	0	0	0	1	0	0	0	0	0	0	0	0	0	0	0	0	0	0	0	0	0	0	0	0	2243	1.22733	0	0	0
2664	BC012201	GDI1	GDI1	1344	0	0	*	1147	624	0	0	0	0	0	0	0	0	0	0	0	0	0	0	0	0	0	0	0	0	0	0	0	0	0	0	0	0	0	0	0	0	0	0	0	0	0	0	0	0
2668	BC069369	GDNF	GDNF	636	0	0	*	1225	3364	5	0	0	2242	-0.585391	0	0	0	0	0	0	0	0	0	0	0	1713	0.483743	0	0	0	0	0	0	384	0	0	0	0	0	0	0	616	-0.991779	0	360	0	0	0	0
81544	BC030626	GDPD5	GDPD5	1818	0	0	*	1097	2490	0	0	0	0	0	0	0	0	55	0	0	0	0	0	0	0	0	0	0	4587	0.881405	0	0	0	0	0	0	0	0	0	0	0	3	0	0	8930	1.84251	1	1	0
2669	BC022010	GEM	GEM	891	0	0	*	641	406	0	0	0	0	0	0	0	0	0	0	0	0	0	0	0	0	0	0	0	0	0	0	0	0	0	0	0	0	0	0	0	0	0	0	0	0	0	0	0	0
79760	BC007793	GEMIN7	GEMIN7	396	0	0	*	941	384	0	0	0	0	0	0	0	0	0	0	0	0	0	0	0	0	104	0	0	342	0	0	0	0	0	0	0	0	0	0	0	0	0	0	0	0	0	0	0	0
492303	BC009550	LOC492303	GEMIN8P4	366	0	0	*	12013	7300	16293	0.439656	0	11	0	0	0	0	11233	-0.0968532	0	6931	-0.0748329	0	0	0	0	0	0	15439	1.08061	0	0	0	0	0	0	2294	-1.67003	0	0	0	521	-4.52717	0	18248	1.32177	0	0	0
51608	BC003550	C7orf20	GET4	984	0	0	*	7076	4653	0	0	0	0	0	0	0	0	0	0	0	0	0	0	0	0	0	0	0	0	0	0	0	0	3	0	0	0	0	0	0	0	2274	-1.6377	0	0	0	0	0	0
65263	BC007993	PYCRL	PYCR3	825	0	0	*	1446	424	0	0	0	773	0.866404	0	0	0	0	0	0	0	0	0	0	0	0	0	0	2029	2.25863	1	1	0	0	0	0	0	0	0	0	0	0	0	0	0	0	0	0	0
2674	BC014962	GFRA1	GFRA1	1383	0	0	*	1499	1061	0	0	0	0	0	0	0	0	0	0	0	0	0	0	0	0	0	0	0	0	0	0	0	0	0	0	0	2358	1.15214	0	0	0	0	0	0	0	0	0	0	0
84305	BC006135	WIBG	PYM1	615	0	0	*	810	50	0	0	0	0	0	0	0	0	0	0	0	0	0	0	0	0	1418	0.807864	0	1418	4.82579	1	1	0	0	0	0	0	0	0	0	0	3	0	0	0	0	0	0	0
26088	BC044629	GGA1	GGA1	1659	0	0	*	536	2544	0	0	0	0	0	0	0	0	0	0	0	4662	0.87385	0	0	0	1	0	0	0	0	0	0	0	0	0	0	3831	0.590622	0	0	0	0	0	0	0	0	0	0	0
79912	BC021662	FLJ22028	PYROXD1	1503	0	0	*	50	914	0	0	0	0	0	0	0	0	0	0	0	0	0	0	0	0	0	0	0	3756	2.03893	1	1	0	0	0	0	0	0	0	0	0	0	0	0	0	0	0	0	0
23475	BC018910	QPRT	QPRT	894	0	0	*	263	674	0	0	0	0	0	0	0	0	0	0	0	0	0	0	0	0	0	0	0	5684	3.07609	1	1	0	0	0	0	2618	1.95764	1	1	0	0	0	0	0	0	0	0	0
84932	BC020839	RAB2B	RAB2B	651	0	0	*	500	3705	165	0	0	14028	1.92076	1	1	0	9041	4.17648	1	123	0	0	1	0	445	0	0	21707	2.55061	1	1	0	0	0	0	0	0	0	0	0	2199	2.13685	1	0	0	0	1	0
9545	BC016471	RAB3D	RAB3D	660	0	0	*	10289	8273	16979	0.722649	0	21427	1.37295	0	0	0	17425	0.760056	0	4770	-0.794421	0	0	0	4001	-1.36267	0	27804	1.74881	1	1	0	16878	0.714041	0	388	0	0	0	0	8	0	0	6036	-0.454818	0	0	0
91227	BC069534	GGTL4	GGTLC2	657	0	0	*	18826	19418	83	0	0	11694	-0.731626	0	0	0	3890	-2.27488	0	4770	-2.02533	0	0	0	616	-4.93365	0	30163	0.635385	0	0	0	3	0	0	10602	-0.873058	0	0	0	11800	-0.67394	0	2561	-2.92262	0	0	0
2689	BC020760	GH2	GH2	654	0	0	*	1375	222	139	0	0	5395	4.60299	1	1	0	0	0	0	0	0	0	0	0	1	0	0	0	0	0	0	0	12	0	0	363	0	0	0	0	0	0	0	14	0	0	0	0
54994	BC032120	C20orf11	GID8	687	0	0	*	1553	3180	9273	2.57798	1	0	0	0	1	0	438	0	0	4739	0.575556	0	0	0	3684	1.24622	0	3912	0.29888	0	0	0	0	0	0	3200	0.00904514	0	0	0	2104	0.438077	0	0	0	0	0	0
170575	BC040736	GIMAP1	GIMAP1	921	0	0	*	6497	3140	0	0	0	0	0	0	0	0	0	0	0	0	0	0	0	0	1063	-2.61163	0	6457	1.0401	0	0	0	0	0	0	0	0	0	0	0	72	0	0	9262	1.56056	1	1	0
26157	BC013934	GIMAP2	GIMAP2	1014	0	0	*	821	1610	1962	1.25687	0	0	0	0	0	0	0	0	0	0	0	0	0	0	0	0	0	0	0	0	0	0	0	0	0	0	0	0	0	0	0	0	0	2589	0.685334	0	0	0
91775	BC009431	FAM55C	NXPE3	1680	0	0	*	50	312	8747	7.45072	1	0	0	0	1	7.45072	2466	5.6241	1	0	0	0	1	0	0	0	0	0	0	0	0	0	0	0	0	0	0	0	0	0	3	0	0	0	0	0	0	0
55340	BC011732	GIMAP5	GIMAP5	924	0	0	*	1032	2216	0	0	0	0	0	0	0	0	0	0	0	0	0	0	0	0	0	0	0	0	0	0	0	0	0	0	0	0	0	0	0	0	18684	4.17829	1	0	0	0	1	0
474344	BC069461	GIMAP6	GIMAP6	735	0	0	*	616	462	0	0	0	0	0	0	0	0	0	0	0	0	0	0	0	0	0	0	0	0	0	0	0	0	0	0	0	0	0	0	0	0	0	0	0	0	0	0	0	0
116254	BC014320	C6orf72	GINM1	993	0	0	*	212	546	0	0	0	0	0	0	0	0	0	0	0	0	0	0	0	0	0	0	0	0	0	0	0	0	0	0	0	0	0	0	0	0	0	0	0	0	0	0	0	0
51659	BC003186	Pfs2	GINS2	558	0	0	*	11046	7727	8857	-0.318634	0	21359	1.46686	0	0	0	658	-4.06929	0	13429	0.797372	0	0	0	7249	-0.60767	0	10455	0.436213	0	0	0	13628	0.30305	0	15293	0.984891	0	0	0	4747	-1.21844	0	2617	-1.56199	0	0	0
64785	BC005879	FLJ13912	GINS3	651	0	0	*	1770	702	0	0	0	0	0	0	0	0	0	0	0	0	0	0	0	0	0	0	0	336	0	0	0	0	0	0	0	7207	3.35986	1	1	0	0	0	0	0	0	0	0	0
2695	BC069663	GIP	GIP	462	0	0	*	1537	755	0	0	0	0	0	0	0	0	0	0	0	0	0	0	0	0	0	0	0	0	0	0	0	0	0	0	0	0	0	0	0	0	0	0	0	0	0	0	0	0
10966	BC018039	RAB40B	RAB40B	837	0	0	*	1817	783	2522	0.47301	0	227	-1.78632	0	0	0	603	-1.59133	0	0	0	0	0	0	0	0	0	6036	2.94651	1	1	0	727	-1.32153	0	0	0	0	0	0	0	0	0	7504	3.26058	1	1	0
5867	BC004309	RAB4A	RAB4A	657	0	0	*	341	147	0	0	0	0	0	0	0	0	0	0	0	803	2.44958	1	1	0	0	0	0	724	2.30017	1	1	0	0	0	0	785	2.41688	1	1	0	0	0	0	4915	5.0633	1	1	0
2705	BC002805	GJB1	GJB1	852	0	0	*	557	1570	0	0	0	0	0	0	0	0	0	0	0	0	0	0	0	0	0	0	0	0	0	0	0	0	0	0	0	0	0	0	0	0	0	0	0	0	0	0	0	0
2706	BC017048	GJB2	GJB2	681	0	0	*	3619	428	0	0	0	0	0	0	0	0	0	0	0	0	0	0	0	0	3182	-0.185657	0	0	0	0	0	0	2273	-0.670993	0	0	0	0	0	0	0	0	0	4984	3.54162	1	1	0
2707	BC012918	GJB3	GJB3	813	0	0	*	2002	2846	1116	-0.843105	0	3859	0.439291	0	0	0	0	0	0	15	0	0	0	0	744	-1.42807	0	559	-2.34802	0	0	0	0	0	0	13030	2.19483	1	1	0	6	0	0	678	-2.06958	0	0	0
127534	BC034709	GJB4	GJB4	801	0	0	*	1934	3258	0	0	0	0	0	0	0	0	0	0	0	0	0	0	0	0	0	0	0	0	0	0	0	0	0	0	0	0	0	0	0	0	0	0	0	0	0	0	0	0
2710	BC042421	GK	GK	1593	0	0	*	2775	281	0	0	0	0	0	0	0	0	0	0	0	0	0	0	0	0	0	0	0	0	0	0	0	0	0	0	0	0	0	0	0	0	0	0	0	0	0	0	0	0
2713	BC066960	GKP3	GK3P	1662	0	0	*	386	493	0	0	0	0	0	0	0	0	0	0	0	0	0	0	0	0	1	0	0	0	0	0	0	0	0	0	0	0	0	0	0	0	0	0	0	0	0	0	0	0
112937	BC011001	LOC112937	GLB1L3	942	0	0	*	1238	1142	0	0	0	0	0	0	0	0	1041	-0.250041	0	0	0	0	0	0	486	0	0	0	0	0	0	0	1672	0.433564	0	25	0	0	0	0	0	0	0	0	0	0	0	0
389741	BC027338	MGC21881	GLIDR	285	0	0	*	2711	1626	803	-1.75535	0	0	0	0	0	0	2137	-0.343238	0	139	0	0	0	0	36	0	0	4034	1.31088	0	0	0	0	0	0	0	0	0	0	0	0	0	0	0	0	0	0	0
11010	BC012510	GLIPR1	GLIPR1	801	0	0	*	5700	4079	0	0	0	5168	0.341391	0	0	0	0	0	0	0	0	0	0	0	0	0	0	9	0	0	0	0	0	0	0	0	0	0	0	0	0	0	0	0	0	0	0	0
144321	BC029557	MGC39497	GLIPR1L2	762	0	0	*	290	100	0	0	0	0	0	0	0	0	0	0	0	0	0	0	0	0	0	0	0	0	0	0	0	0	0	0	0	0	0	0	0	0	0	0	0	3544	5.14731	1	1	0
152007	BC017918	C9orf19	GLIPR2	273	0	0	*	2608	1127	4316	0.726751	0	567	-0.991067	0	0	0	0	0	0	7888	2.80717	1	1	0	630	-2.04952	0	2870	1.34856	0	0	0	0	0	0	0	0	0	0	0	0	0	0	235	0	0	0	0
2739	BC011365	GLO1	GLO1	555	0	0	*	1484	596	0	0	0	0	0	0	0	0	0	0	0	3334	2.48387	1	1	0	0	0	0	232	0	0	0	0	235	0	0	4393	2.88182	1	1	0	0	0	0	0	0	0	0	0
51031	BC008605	C17orf25	GLOD4	897	0	0	*	361	983	0	0	0	6168	2.64954	1	1	0	219	0	0	0	0	0	0	0	0	0	0	0	0	0	0	0	0	0	0	0	0	0	0	0	0	0	0	0	0	0	0	0
2742	BC032864	GLRA2	GLRA2	1359	0	0	*	2992	3811	0	0	0	0	0	0	0	0	932	-1.68271	0	5356	0.490986	0	0	0	3491	0.22253	0	0	0	0	0	0	331	0	0	6368	0.740671	0	0	0	16292	2.44498	1	0	0	0	1	0
2745	BC010965	GLRX	GLRX	321	0	0	*	1691	3673	6382	1.91613	1	0	0	0	1	0	10794	2.67428	1	6267	0.770816	0	1	0	0	0	0	1519	-1.27384	0	0	0	10630	2.65219	1	5035	0.455033	0	1	0	3474	1.03872	0	1205	-1.60793	0	0	0
83468	BC022343	GLT8D2	GLT8D2	1050	0	0	*	1312	4013	0	0	0	0	0	0	0	0	0	0	0	4260	0.0861723	0	0	0	1	0	0	458	0	0	0	0	0	0	0	0	0	0	0	0	0	0	0	0	0	0	0	0
5876	BC020790	RABGGTB	RABGGTB	996	0	0	*	3508	743	0	0	0	259	-1.52041	0	0	0	0	0	0	15	0	0	0	0	0	0	0	7793	3.39074	1	1	0	0	0	0	7394	3.31492	1	1	0	6834	0.962081	0	2631	1.82418	1	1	0
2752	BC011852	GLUL	GLUL	1122	0	0	*	5881	2172	3	0	0	7675	1.82114	1	1	0	0	0	0	6684	1.62169	1	1	0	0	0	0	2368	0.124645	0	0	0	9	0	0	0	0	0	0	0	0	0	0	0	0	0	0	0
10249	BC009785	GLYAT	GLYAT	492	0	0	*	586	2409	0	0	0	0	0	0	0	0	0	0	0	93	0	0	0	0	0	0	0	0	0	0	0	0	0	0	0	0	0	0	0	0	0	0	0	0	0	0	0	0
92292	BC008353	GLYATL1	GLYATL1	909	0	0	*	839	1464	0	0	0	0	0	0	0	0	0	0	0	0	0	0	0	0	0	0	0	0	0	0	0	0	0	0	0	0	0	0	0	0	0	0	0	0	0	0	0	0
138046	BC031090	LOC138046	RALYL	876	0	0	*	3239	690	0	0	0	0	0	0	0	0	0	0	0	0	0	0	0	0	2776	-0.222541	0	6335	3.19868	1	1	0	0	0	0	0	0	0	0	0	0	0	0	13125	4.24958	1	1	0
132158	BC042151	GLYCTK	GLYCTK	1572	0	0	*	401	62	0	0	0	0	0	0	0	0	0	0	0	0	0	0	0	0	137	0	0	0	0	0	0	0	0	0	0	0	0	0	0	0	0	0	0	0	0	0	0	0
2760	BC009273	GM2A	GM2A	582	0	0	*	2877	2369	37	0	0	6576	1.47293	0	0	0	2027	-0.505219	0	8675	1.87259	1	1	0	0	0	0	0	0	0	0	0	9304	1.69329	1	5337	1.17175	0	1	0	0	0	0	15770	2.73483	1	1	0
221002	BC022548	RASGEF1A	RASGEF1A	1287	0	0	*	1986	1039	0	0	0	0	0	0	0	0	0	0	0	0	0	0	0	0	0	0	0	3032	1.54507	1	1	0	0	0	0	5904	2.5065	1	1	0	0	0	0	9692	3.2216	1	1	0
2764	BC005359	GMFB	GMFB	465	0	0	*	2473	3052	0	0	0	0	0	0	0	0	0	0	0	0	0	0	0	0	0	0	0	0	0	0	0	0	0	0	0	0	0	0	0	0	0	0	0	9844	1.68949	1	1	0
29925	BC001141	GMPPB	GMPPB	1083	0	0	*	666	1314	0	0	0	4	0	0	0	0	0	0	0	0	0	0	0	0	297	0	0	0	0	0	0	0	0	0	0	3	0	0	0	0	0	0	0	0	0	0	0	0
2767	BC001528	GNA11	GNA11	513	0	0	*	2110	1838	0	0	0	0	0	0	0	0	0	0	0	8258	2.16766	1	1	0	0	0	0	492	0	0	0	0	0	0	0	0	0	0	0	0	0	0	0	0	0	0	0	0
2774	BC050021	GNAL	GNAL	1377	0	0	*	1564	1286	0	0	0	0	0	0	0	0	0	0	0	0	0	0	0	0	0	0	0	0	0	0	0	0	0	0	0	4703	1.87069	1	1	0	0	0	0	4223	1.71538	1	1	0
2775	BC030027	GNAO1	GNAO1	909	0	0	*	50	802	0	0	0	0	0	0	0	0	0	0	0	0	0	0	0	0	0	0	0	0	0	0	0	0	0	0	0	0	0	0	0	0	0	0	0	0	0	0	0	0
2776	BC057777	GNAQ	GNAQ	1080	0	0	*	748	115	0	0	0	0	0	0	0	0	0	0	0	0	0	0	0	0	0	0	0	3	0	0	0	0	0	0	0	0	0	0	0	0	0	0	0	0	0	0	0	0
2778	BC008855	GNAS	GNAS	1188	0	0	*	1192	1651	5998	2.3311	1	0	0	0	1	0	0	0	0	0	0	0	0	0	0	0	0	0	0	0	0	0	0	0	0	2920	0.822628	0	0	0	0	0	0	0	0	0	0	0
2780	BC000233	GNAT2	GNAT2	1065	0	0	*	79	540	0	0	0	0	0	0	0	0	0	0	0	0	0	0	0	0	15	0	0	0	0	0	0	0	0	0	0	0	0	0	0	0	0	0	0	0	0	0	0	0
2781	BC078163	GNAZ	GNAZ	1068	0	0	*	3286	1729	75	0	0	82	-4.39817	0	0	0	2082	-0.658362	0	0	0	0	0	0	0	0	0	1953	0.175754	0	0	0	0	0	0	3999	1.2097	0	0	0	0	0	0	3586	1.05244	0	0	0
2782	BC008991	GNB1	GNB1	1023	0	0	*	50	668	0	0	0	0	0	0	0	0	0	0	0	0	0	0	0	0	0	0	0	0	0	0	0	0	0	0	0	0	0	0	0	0	0	0	0	0	0	0	0	0
54584	BC012060	GNB1L	GNB1L	984	0	0	*	2204	2419	13	0	0	3795	0.649689	0	0	0	0	0	0	0	0	0	0	0	1734	-0.34602	0	0	0	0	0	0	0	0	0	0	0	0	0	0	0	0	0	208	0	0	0	0
2783	BC012348	GNB2	GNB2	1023	0	0	*	9277	7075	0	0	0	0	0	0	0	0	3945	-1.23363	0	0	0	0	0	0	0	0	0	9376	0.406242	0	0	0	0	0	0	0	0	0	0	0	53	0	0	2243	-1.6573	0	0	0
2784	BC015920	GNB3	GNB3	894	0	0	*	792	50	0	0	0	0	0	0	0	0	0	0	0	0	0	0	0	0	0	0	0	0	0	0	0	0	0	0	0	0	0	0	0	0	0	0	0	0	0	0	0	0
10681	BC013997	GNB5	GNB5	1062	0	0	*	4835	1064	0	0	0	0	0	0	0	0	4000	-0.273516	0	4137	1.95909	1	1	0	0	0	0	0	0	0	0	0	0	0	0	0	0	0	0	0	0	0	0	0	0	0	0	0
2790	BC010384	GNG10	GNG10	207	0	0	*	10845	9328	59	0	0	14092	0.595237	0	0	0	0	0	0	15822	0.762292	0	0	0	336	0	0	12200	0.387241	0	0	0	554	-4.291	0	0	0	0	0	0	0	0	0	5330	-0.807432	0	0	0
55970	BC005940	GNG12	GNG12	219	0	0	*	444	527	0	0	0	0	0	0	0	0	0	0	0	0	0	0	0	0	0	0	0	0	0	0	0	0	7354	4.0499	1	0	0	0	1	0	0	0	0	0	0	0	0	0
54331	BC060856	GNG2	GNG2	216	0	0	*	625	1080	0	0	0	0	0	0	0	0	0	0	0	0	0	0	0	0	0	0	0	547	-0.981419	0	0	0	0	0	0	8	0	0	0	0	0	0	0	0	0	0	0	0
2786	BC022485	GNG4	GNG4	228	0	0	*	311	2534	0	0	0	0	0	0	0	0	0	0	0	1204	-1.07358	0	0	0	0	0	0	0	0	0	0	0	0	0	0	0	0	0	0	0	0	0	0	4112	0.698424	0	0	0
2792	BC029367	GNGT1	GNGT1	225	0	0	*	1857	50	5389	1.53704	1	0	0	0	1	0	0	0	0	0	0	0	0	0	0	0	0	373	0	0	0	0	0	0	0	198	0	0	0	0	0	0	0	0	0	0	0	0
54552	BC011720	GNL3L	GNL3L	1749	0	0	*	230	203	0	0	0	0	0	0	0	0	0	0	0	0	0	0	0	0	0	0	0	0	0	0	0	0	0	0	0	0	0	0	0	0	0	0	0	0	0	0	0	0
10578	BC023576	GNLY	GNLY	438	0	0	*	261	119	686	1.39416	0	0	0	0	0	0	0	0	0	0	0	0	0	0	0	0	0	0	0	0	0	0	0	0	0	3	0	0	0	0	0	0	0	0	0	0	0	0
27232	BC032627	GNMT	GNMT	888	0	0	*	648	137	0	0	0	0	0	0	0	0	0	0	0	0	0	0	0	0	0	0	0	0	0	0	0	0	0	0	0	0	0	0	0	0	0	0	0	0	0	0	0	0
10007	BC020769	GNPDA1	GNPDA1	870	0	0	*	55	802	0	0	0	0	0	0	0	0	0	0	0	0	0	0	0	0	0	0	0	0	0	0	0	0	0	0	0	0	0	0	0	0	1755	4.9959	1	0	0	0	1	0
84572	BC014592	GNPTG	GNPTG	915	0	0	*	2864	1829	0	0	0	0	0	0	0	0	0	0	0	0	0	0	0	0	0	0	0	0	0	0	0	0	29	0	0	1760	-0.0554796	0	0	0	3	0	0	0	0	0	0	0
2801	BC069268	GOLGA2	GOLGA2	2973	0	0	*	1340	406	0	0	0	0	0	0	0	0	1370	0.0319429	0	9709	4.57977	1	1	0	0	0	0	0	0	0	0	0	0	0	0	0	0	0	0	0	0	0	0	0	0	0	0	0
2803	BC050444	GOLGA4	GOLGA4	501	0	0	*	103	1966	924	3.16525	1	0	0	0	1	0	0	0	0	93	0	0	0	0	0	0	0	0	0	0	0	0	0	0	0	45	0	0	0	0	0	0	0	0	0	0	0	0
51125	BC001227	GOLGA7	GOLGA7	405	0	0	*	2870	2784	5213	0.861063	0	0	0	0	0	0	0	0	0	1189	-1.22741	0	0	0	3113	0.117255	0	1366	-1.0272	0	0	0	0	0	0	1299	-1.09976	0	0	0	0	0	0	0	0	0	0	0
91608	BC041133	RASL10B	RASL10B	612	0	0	*	3807	2135	0	0	0	5778	1.43633	0	0	0	0	0	0	0	0	0	0	0	0	0	0	9517	2.15627	1	1	0	1895	-1.00646	0	0	0	0	0	0	0	0	0	2921	0.452226	0	0	0
83593	BC042651	RASSF5	RASSF5	798	0	0	*	1723	3885	4356	1.33808	0	0	0	0	0	0	0	0	0	10959	1.49613	0	0	0	0	0	0	11152	1.52132	1	1	0	0	0	0	0	0	0	0	0	0	0	0	0	0	0	0	0
51026	BC012455	GOLT1B	GOLT1B	417	0	0	*	506	1142	0	0	0	0	0	0	0	0	0	0	0	0	0	0	0	0	0	0	0	0	0	0	0	0	0	0	0	0	0	0	0	0	0	0	0	1052	-0.118428	0	0	0
29890	BC001367	RBM15B	RBM15B	1257	1	0	NA	2271	1420	35	0	0	9846	2.79365	1	1	0	0	0	0	0	0	0	0	0	2108	-0.107453	0	8676	2.61114	1	1	0	0	0	0	4558	1.68251	1	1	0	0	0	0	0	0	0	0	0
64689	BC075854	GORASP1	GORASP1	1323	0	0	*	3362	2066	0	0	0	0	0	0	0	0	0	0	0	0	0	0	0	0	412	0	0	0	0	0	0	0	0	0	0	0	0	0	0	0	6721	0.999356	0	3378	0.709329	0	0	0
84991	BC039322	RBM17	RBM17	1206	0	0	*	1829	637	0	0	0	0	0	0	0	0	0	0	0	0	0	0	0	0	405	0	0	3307	2.37616	1	1	0	1892	0.048857	0	0	0	0	0	0	0	0	0	0	0	0	0	0
9570	BC034762	GOSR2	GOSR2	588	0	0	*	2642	403	0	0	0	6200	3.94342	1	1	0	4493	0.766049	0	0	0	0	0	0	1240	-1.09129	0	0	0	0	0	0	0	0	0	4474	3.47271	1	1	0	0	0	0	1606	1.99462	1	1	0
2806	BC000525	GOT2	GOT2	1293	0	0	*	949	140	0	0	0	0	0	0	0	0	329	0	0	0	0	0	0	0	0	0	0	0	0	0	0	0	103	0	0	0	0	0	0	0	0	0	0	194	0	0	0	0
10223	BC069789	GPA33	GPA33	960	0	0	*	3950	184	0	0	0	0	0	0	0	0	0	0	0	0	0	0	0	0	0	0	0	0	0	0	0	0	0	0	0	0	0	0	0	0	0	0	0	0	0	0	0	0
137964	BC051377	AGPAT6	GPAT4	1371	0	0	*	479	50	0	0	0	0	0	0	0	0	0	0	0	0	0	0	0	0	0	0	0	0	0	0	0	0	0	0	0	2459	5.62	1	1	0	0	0	0	0	0	0	0	0
151306	BC033625	GPBAR1	GPBAR1	993	0	0	*	160	50	0	0	0	0	0	0	0	0	0	0	0	2902	5.85898	1	1	0	0	0	0	0	0	0	0	0	0	0	0	0	0	0	0	0	0	0	0	0	0	0	0	0
65056	BC000267	GPBP1	GPBP1	546	1	1	Unknown	1858	2135	0	0	0	1376	-0.633756	0	0	0	110	0	0	4708	1.14088	0	0	0	4206	1.1787	0	0	0	0	0	0	5230	1.49306	0	25	0	0	0	0	0	0	0	2561	0.262471	0	0	0
2239	BC017166	GPC4	GPC4	1671	0	0	*	559	53	0	0	0	0	0	0	0	0	0	0	0	0	0	0	0	0	0	0	0	0	0	0	0	0	0	0	0	25	0	0	0	0	0	0	0	0	0	0	0	0
2819	BC032234	GPD1	GPD1	1050	0	0	*	4145	3514	0	0	0	0	0	0	0	0	3726	-0.153744	0	0	0	0	0	0	0	0	0	0	0	0	0	0	947	-2.12994	0	0	0	0	0	0	3	0	0	0	0	0	0	0
2852	BC011634	GPR30	GPER1	1128	1	1	Unknown	2263	1879	0	0	0	0	0	0	0	0	0	0	0	0	0	0	0	0	0	0	0	0	0	0	0	0	0	0	0	0	0	0	0	0	0	0	0	0	0	0	0	0
27238	BC000397	GPKOW	GPKOW	1431	0	0	*	2113	737	0	0	0	0	0	0	0	0	2301	0.122968	0	9663	3.71273	1	1	0	2978	0.495051	0	0	0	0	0	0	0	0	0	0	0	0	0	0	0	0	0	0	0	0	0	0
2822	BC020748	GPLD1	GPLD1	531	0	0	*	16769	21312	13434	-0.319908	0	19696	-0.113763	0	0	0	42246	1.33302	0	46291	1.11907	0	0	0	5177	-1.69561	0	1910	-3.48002	0	0	0	16593	-0.0152219	0	9129	-1.22314	0	0	0	12294	-0.447842	0	4389	-2.2797	0	0	0
2823	BC044612	GPM6A	GPM6A	837	0	0	*	5440	4266	0	0	0	0	0	0	0	0	0	0	0	8397	0.97699	0	0	0	63	0	0	0	0	0	0	0	0	0	0	7721	0.855904	0	0	0	0	0	0	0	0	0	0	0
2824	BC047295	GPM6B	GPM6B	918	0	0	*	5614	4541	0	0	0	507	-3.16295	0	0	0	0	0	0	0	0	0	0	0	2206	-1.3476	0	1861	-1.28693	0	0	0	217	0	0	2738	-0.729888	0	0	0	2190	-1.3581	0	1994	-1.18734	0	0	0
54707	BC007815	ATPBD1B	GPN2	933	0	0	*	1568	4416	2047	0.384586	0	2029	-1.12197	0	0	0	2027	0.370421	0	3735	-0.241632	0	0	0	388	0	0	2289	-0.948023	0	0	0	0	0	0	246	0	0	0	0	341	0	0	2326	-0.924889	0	0	0
51184	BC031024	ATPBD1C	GPN3	855	0	0	*	3892	1124	4004	0.0409303	0	0	0	0	0	0	0	0	0	247	0	0	0	0	567	-2.77909	0	0	0	0	0	0	0	0	0	22	0	0	0	0	0	0	0	0	0	0	0	0
10457	BC011595	GPNMB	GPNMB	621	0	0	*	1051	2235	0	0	0	0	0	0	0	0	0	0	0	0	0	0	0	0	0	0	0	0	0	0	0	0	0	0	0	4298	0.943391	0	0	0	6	0	0	3337	0.578277	0	0	0
115330	BC014241	GPR146	GPR146	1002	0	0	*	1001	643	0	0	0	0	0	0	0	0	0	0	0	0	0	0	0	0	0	0	0	0	0	0	0	0	0	0	0	7444	3.53319	1	1	0	0	0	0	0	0	0	0	0
51538	BC007446	PS1D	ZCCHC17	726	0	0	*	2811	50	0	0	0	0	0	0	0	0	164	0	0	0	0	0	0	0	0	0	0	1308	4.70929	1	1	0	0	0	0	8120	7.34341	1	1	0	0	0	0	4417	6.46499	1	1	6.46499
27239	BC002353	GPR162	GPR162	915	0	0	*	1851	580	0	0	0	0	0	0	0	0	0	0	0	0	0	0	0	0	0	0	0	0	0	0	0	0	0	0	0	285	0	0	0	0	0	0	0	5953	3.35949	1	1	0
2840	BC031653	GPR17	GPR17	1020	0	0	*	3041	1545	0	0	0	10513	2.7665	1	1	0	0	0	0	0	0	0	0	0	0	0	0	0	0	0	0	0	0	0	0	0	0	0	0	0	0	0	0	0	0	0	0	0
29909	BC036815	GPR171	GPR171	960	0	0	*	1604	786	0	0	0	0	0	0	0	0	0	0	0	0	0	0	0	0	0	0	0	0	0	0	0	0	0	0	0	0	0	0	0	0	0	0	0	0	0	0	0	0
54328	BC009861	GPR173	GPR173	1122	0	0	*	797	1002	0	0	0	0	0	0	0	0	0	0	0	0	0	0	0	0	0	0	0	0	0	0	0	0	0	0	0	0	0	0	0	0	0	0	0	0	0	0	0	0
23543	BC025281	RBM9	RBFOX2	1143	1	0	NA	292	1741	0	0	0	0	0	0	0	0	19616	6.06992	1	0	0	0	1	6.06992	33563	6.84476	1	107	0	0	1	6.84476	18914	6.01734	1	0	0	0	1	6.01734	14284	5.61229	1	0	0	0	1	0
5603	BC000433	MAPK13	MAPK13	1098	0	0	*	50	1083	37	0	0	0	0	0	0	0	4822	6.59156	1	0	0	0	1	6.59156	0	0	0	15	0	0	0	0	0	0	0	0	0	0	0	0	0	0	0	0	0	0	0	0
2828	BC067536	GPR4	GPR4	1089	0	0	*	384	87	0	0	0	0	0	0	0	0	0	0	0	0	0	0	0	0	0	0	0	0	0	0	0	0	188	0	0	0	0	0	0	0	0	0	0	0	0	0	0	0
5527	BC016183	PPP2R5C	PPP2R5C	1155	0	0	*	85	1420	0	0	0	0	0	0	0	0	0	0	0	0	0	0	0	0	0	0	0	1577	0.151292	0	0	0	0	0	0	0	0	0	0	0	1949	4.51913	1	0	0	0	1	0
83873	BC067464	GPR61	GPR61	1356	0	0	*	158	1192	0	0	0	0	0	0	0	0	0	0	0	0	0	0	0	0	0	0	0	0	0	0	0	0	0	0	0	0	0	0	0	0	0	0	0	0	0	0	0	0
8477	BC035633	GPR65	GPR65	1014	0	0	*	467	893	0	0	0	0	0	0	0	0	0	0	0	0	0	0	0	0	0	0	0	0	0	0	0	0	3317	2.82838	1	0	0	0	1	0	0	0	0	0	0	0	0	0
5955	BC004892	RCN2	RCN2	954	0	0	*	451	484	1543	1.77454	1	0	0	0	1	0	767	0.766099	0	46	0	0	0	0	0	0	0	1711	1.82176	1	1	0	1555	1.78572	1	11	0	0	1	0	0	0	0	1814	1.9061	1	1	0
53831	BC020614	GPR84	GPR84	1191	0	0	*	630	849	0	0	0	0	0	0	0	0	0	0	0	0	0	0	0	0	0	0	0	0	0	0	0	0	0	0	0	0	0	0	0	0	0	0	0	0	0	0	0	0
53836	BC009540	GPR87	GPR87	810	0	0	*	834	712	0	0	0	0	0	0	0	0	0	0	0	0	0	0	0	0	74	0	0	0	0	0	0	0	0	0	0	0	0	0	0	0	0	0	0	0	0	0	0	0
51463	BC003187	GPR89	GPR89B	1368	0	0	*	1616	1298	0	0	0	0	0	0	0	0	603	-1.4222	0	7147	2.46105	1	1	0	0	0	0	0	0	0	0	0	384	0	0	0	0	0	0	0	0	0	0	0	0	0	0	0
26086	BC017353	GPSM1	GPSM1	1305	0	0	*	1634	6766	13664	3.0639	1	0	0	0	1	0	2466	0.593765	0	3720	-0.863001	0	0	0	3835	1.23082	0	3	0	0	0	0	5192	1.66788	1	5714	-0.243802	0	1	0	11412	2.80407	1	17929	1.40592	0	1	0
2878	BC050378	GPX3	GPX3	681	0	0	*	1199	1392	1425	0.24913	0	0	0	0	0	0	1479	0.30279	0	2331	0.74379	0	0	0	0	0	0	0	0	0	0	0	0	0	0	0	0	0	0	0	0	0	0	526	-1.40402	0	0	0
2879	BC022071	GPX4	GPX4	594	0	0	*	1045	874	0	0	0	0	0	0	0	0	2301	1.13876	0	479	0	0	0	0	1571	0.58818	0	0	0	0	0	0	0	0	0	738	-0.244012	0	0	0	0	0	0	0	0	0	0	0
2882	BC032788	GPX7	GPX7	564	0	0	*	552	1617	0	0	0	0	0	0	0	0	0	0	0	0	0	0	0	0	1512	1.45372	0	226	0	0	0	0	0	0	0	0	0	0	0	0	0	0	0	1841	0.18717	0	0	0
493869	BC029424	LOC493869	GPX8	630	0	0	*	2596	7940	8654	1.73708	1	5877	-0.434059	0	1	0	0	0	0	201	0	0	0	0	5658	1.124	0	5892	-0.430382	0	0	0	0	0	0	4896	-0.697535	0	0	0	10630	2.03378	1	5843	-0.44243	0	1	0
112724	BC009881	RDH13	RDH13	783	0	0	*	3273	1120	0	0	0	0	0	0	0	0	0	0	0	15683	3.80763	1	1	0	1487	-1.13821	0	5684	2.34341	1	1	0	147	0	0	5203	2.21584	1	1	0	0	0	0	180	0	0	0	0
2886	BC006535	GRB7	GRB7	1599	0	0	*	5775	2668	0	0	0	0	0	0	0	0	0	0	0	0	0	0	0	0	0	0	0	0	0	0	0	0	0	0	0	0	0	0	0	0	0	0	0	3074	0.204358	0	0	0
64388	BC046632	GREM2	GREM2	507	0	0	*	5383	2831	0	0	0	0	0	0	0	0	0	0	0	0	0	0	0	0	4803	-0.164475	0	0	0	0	0	0	0	0	0	4954	0.807282	0	0	0	0	0	0	0	0	0	0	0
2894	BC047948	GRID1	GRID1	393	0	0	*	7080	7840	0	0	0	11	0	0	0	0	0	0	0	18739	1.25712	0	0	0	0	0	0	2310	-1.76296	0	0	0	0	0	0	8942	0.189744	0	0	0	6524	-0.117993	0	526	-3.89772	0	0	0
2905	BC059384	GRIN2C	GRIN2C	516	0	0	*	2689	699	155	0	0	419	-0.738342	0	0	0	0	0	0	0	0	0	0	0	1	0	0	0	0	0	0	0	0	0	0	3	0	0	0	0	0	0	0	0	0	0	0	0
156	BC037963	ADRBK1	GRK2	2070	0	0	*	433	2793	0	0	0	0	0	0	0	0	0	0	0	0	0	0	0	0	0	0	0	0	0	0	0	0	0	0	0	0	0	0	0	0	0	0	0	0	0	0	0	0
2870	BC009277	GRK6	GRK6	1731	0	0	*	4066	602	0	0	0	4494	2.90016	1	1	0	0	0	0	1327	1.14033	0	0	0	0	0	0	0	0	0	0	0	0	0	0	4736	2.97583	1	1	0	0	0	0	0	0	0	0	0
2913	BC041407	GRM3	GRM3	2640	0	0	*	1105	2481	0	0	0	0	0	0	0	0	0	0	0	0	0	0	0	0	0	0	0	0	0	0	0	0	0	0	0	7729	1.63936	1	1	0	0	0	0	0	0	0	0	0
2896	BC010577	GRN	GRN	1782	0	0	*	4506	2562	35	0	0	0	0	0	0	0	0	0	0	0	0	0	0	0	0	0	0	4416	0.78547	0	0	0	0	0	0	7595	1.56778	1	1	0	0	0	0	138	0	0	0	0
2922	BC004488	GRP	GRP	447	0	0	*	50	1021	0	0	0	0	0	0	0	0	1918	5.26153	1	0	0	0	1	0	0	0	0	0	0	0	0	0	0	0	0	0	0	0	0	0	0	0	0	0	0	0	0	0
55503	BC034814	TRPV6	TRPV6	321	0	0	*	50	119	1156	4.53107	1	0	0	0	1	0	49479	9.95067	1	0	0	0	1	9.95067	20317	8.66654	1	0	0	0	1	8.66654	3755	6.23074	1	0	0	0	1	6.23074	14950	8.224	1	0	0	0	1	8.224
55876	BC025682	GSDML	GSDMB	1236	0	0	*	2886	3024	0	0	0	0	0	0	0	0	0	0	0	0	0	0	0	0	0	0	0	0	0	0	0	0	0	0	0	0	0	0	0	0	0	0	0	0	0	0	0	0
8636	BC000864	SSNA1	SSNA1	360	0	0	*	50	1520	0	0	0	0	0	0	0	0	7452	7.21956	1	0	0	0	1	7.21956	0	0	0	0	0	0	0	0	0	0	0	8126	2.41847	1	1	0	0	0	0	6106	2.00616	1	1	0
1687	BC019689	DFNA5	GSDME	888	0	0	*	50	2225	0	0	0	0	0	0	0	0	1315	4.71699	1	0	0	0	1	0	0	0	0	3802	0.772953	0	0	0	0	0	0	13804	2.63321	1	1	0	61	0	0	0	0	0	0	0
83445	BC033854	GSG1	GSG1	972	0	0	*	1362	2181	3988	1.54994	1	0	0	0	1	0	0	0	0	0	0	0	0	0	0	0	0	0	0	0	0	0	0	0	0	662	-1.72009	0	0	0	8096	2.57148	1	0	0	0	1	0
146395	BC016460	MGC18079	GSG1L	531	0	0	*	7790	5964	323	0	0	7	0	0	0	0	0	0	0	11052	0.889955	0	0	0	5522	-0.496432	0	6616	0.149679	0	0	0	1951	-1.99741	0	5072	-0.233726	0	0	0	0	0	0	2021	-1.56121	0	0	0
2941	BC015523	GSTA4	GSTA4	669	0	0	*	686	1030	1735	1.33866	0	8307	3.01168	1	1	0	0	0	0	0	0	0	0	0	0	0	0	0	0	0	0	0	0	0	0	0	0	0	0	0	0	0	0	0	0	0	0	0
373156	BC063425	GSTK1	GSTK1	849	0	0	*	71	115	0	0	0	192	0.739472	0	0	0	0	0	0	0	0	0	0	0	0	0	0	0	0	0	0	0	0	0	0	0	0	0	0	0	0	0	0	0	0	0	0	0
2947	BC000088	GSTM3	GSTM3	678	0	0	*	651	1807	0	0	0	12251	2.76123	1	1	0	0	0	0	0	0	0	0	0	0	0	0	0	0	0	0	0	0	0	0	0	0	0	0	0	0	0	0	0	0	0	0	0
8226	BC012494	HDHD1A	PUDP	645	0	0	*	50	3467	2237	5.48349	1	0	0	0	1	0	0	0	0	0	0	0	0	0	0	0	0	0	0	0	0	0	0	0	0	0	0	0	0	0	0	0	0	0	0	0	0	0
2949	BC058881	GSTM5	GSTM5	657	0	0	*	2773	967	2517	-0.139742	0	0	0	0	0	0	0	0	0	0	0	0	0	0	1112	-1.31829	0	871	-0.150843	0	0	0	0	0	0	2238	1.21062	0	0	0	0	0	0	0	0	0	0	0
9446	BC000127	GSTO1	GSTO1	726	0	0	*	2020	2837	0	0	0	0	0	0	0	0	4548	1.17088	0	4245	0.581398	0	0	0	3	0	0	2145	-0.403389	0	0	0	1223	-0.723931	0	0	0	0	0	0	8	0	0	3960	0.481134	0	0	0
2950	BC010915	GSTP1	GSTP1	633	0	0	*	723	137	0	0	0	0	0	0	0	0	0	0	0	0	0	0	0	0	0	0	0	0	0	0	0	0	0	0	0	0	0	0	0	0	0	0	0	0	0	0	0	0
64407	BC020632	RGS18	RGS18	708	0	0	*	1520	855	0	0	0	0	0	0	0	0	0	0	0	0	0	0	0	0	0	0	0	7442	3.12169	1	1	0	0	0	0	0	0	0	0	0	0	0	0	0	0	0	0	0
202459	BC024224	LOC202459	OSTCP1	360	0	0	*	114	2266	7994	6.13181	1	0	0	0	1	6.13181	3616	4.98729	1	0	0	0	1	0	0	0	0	0	0	0	0	0	0	0	0	0	0	0	0	0	0	0	0	0	0	0	0	0
11036	BC025991	ALF	GTF2A1L	1437	1	0	Unknown	477	325	0	0	0	0	0	0	0	0	0	0	0	0	0	0	0	0	0	0	0	0	0	0	0	0	23	0	0	0	0	0	0	0	327	0	0	0	0	0	0	0
2959	BC020597	GTF2B	GTF2B	951	1	1	Unknown	2403	2263	1193	-1.01024	0	53	-5.4161	0	0	0	0	0	0	8659	1.93596	1	1	0	4109	0.773951	0	1409	-0.683565	0	0	0	10513	2.12927	1	0	0	0	1	0	3954	0.718476	0	5676	1.32664	0	0	0
2966	BC064557	GTF2H2	GTF2H2	1188	1	1	Unknown	3170	4500	3870	0.287851	0	0	0	0	0	0	8055	1.3454	0	0	0	0	0	0	7626	1.26644	0	0	0	0	0	0	11475	1.85594	1	0	0	0	1	0	0	0	0	831	-2.437	0	0	0
54933	BC013103	RHBDL2	RHBDL2	366	0	0	*	1470	418	0	0	0	0	0	0	0	0	0	0	0	0	0	0	0	0	0	0	0	6989	4.06351	1	1	0	0	0	0	0	0	0	0	0	0	0	0	0	0	0	0	0
122509	BC015423	FAM14B	IFI27L1	315	0	0	*	50	1086	0	0	0	0	0	0	0	0	0	0	0	0	0	0	0	0	0	0	0	0	0	0	0	0	968	4.27501	1	0	0	0	1	0	252	0	0	0	0	0	0	0
112495	BC011593	C6orf51	GTF3C6	642	0	0	*	94	206	0	0	0	0	0	0	0	0	0	0	0	0	0	0	0	0	0	0	0	0	0	0	0	0	0	0	0	0	0	0	0	0	0	0	0	0	0	0	0	0
5998	BC019039	RGS3	RGS3	525	0	0	*	50	1183	707	3.82171	1	0	0	0	1	0	0	0	0	0	0	0	0	0	0	0	0	0	0	0	0	0	1695	5.08321	1	17	0	0	1	0	0	0	0	0	0	0	0	0
4176	BC013375	MCM7	MCM7	2160	1	1	NA	50	1716	0	0	0	0	0	0	0	0	0	0	0	0	0	0	0	0	0	0	0	0	0	0	0	0	0	0	0	6698	1.96468	1	1	0	0	0	0	0	0	0	0	0
8061	BC016648	FOSL1	FOSL1	816	1	1	bZIP	50	718	10779	7.75208	1	0	0	0	1	7.75208	0	0	0	0	0	0	0	0	16753	8.38828	1	0	0	0	1	8.38828	4109	6.36072	1	0	0	0	1	6.36072	12141	7.92374	1	0	0	0	1	7.92374
51512	BC006325	GTSE1	GTSE1	2163	0	0	*	1383	187	0	0	0	0	0	0	0	0	0	0	0	0	0	0	0	0	0	0	0	0	0	0	0	0	0	0	0	0	0	0	0	0	0	0	0	0	0	0	0	0
2978	BC031663	GUCA1A	GUCA1A	606	0	0	*	5390	2912	11	0	0	0	0	0	0	0	0	0	0	988	-1.55943	0	0	0	3	0	0	0	0	0	0	0	0	0	0	0	0	0	0	0	0	0	0	0	0	0	0	0
2982	BC012627	GUCY1A3	GUCY1A1	432	0	0	*	1407	424	0	0	0	0	0	0	0	0	0	0	0	0	0	0	0	0	0	0	0	0	0	0	0	0	405	0	0	0	0	0	0	0	0	0	0	0	0	0	0	0
25936	BC007067	C1orf48	NSL1	846	0	0	*	50	3211	0	0	0	12921	2.00862	1	1	0	0	0	0	0	0	0	0	0	0	0	0	1907	-0.751718	0	0	0	0	0	0	5591	0.800084	0	0	0	0	0	0	138	0	0	0	0
51132	BC013357	RNF12	RLIM	1875	1	0	Unknown	3894	50	0	0	0	993	4.31179	1	1	0	0	0	0	0	0	0	0	0	0	0	0	2158	5.43162	1	1	0	9926	1.34996	0	3711	6.21374	1	1	0	0	0	0	0	0	0	0	0
3611	BC001554	ILK	ILK	1359	0	0	*	50	531	0	0	0	0	0	0	0	0	0	0	0	0	0	0	0	0	0	0	0	0	0	0	0	0	0	0	0	0	0	0	0	0	7924	7.30816	1	0	0	0	1	7.30816
140545	BC028120	RNF32	RNF32	771	0	0	*	50	156	0	0	0	3753	4.58843	1	1	0	0	0	0	0	0	0	0	0	0	0	0	7350	5.55813	1	1	0	1296	4.69599	1	0	0	0	1	0	0	0	0	0	0	0	0	0
6050	BC000677	RNH1	RNH1	1386	0	0	*	124	755	0	0	0	0	0	0	0	0	3233	4.70446	1	0	0	0	1	0	219	0	0	7824	3.37336	1	1	0	0	0	0	0	0	0	0	0	0	0	0	0	0	0	0	0
1761	BC040847	DMRT1	DMRT1	1122	1	1	DM	50	446	5475	6.77479	1	294	-0.601228	0	1	6.77479	0	0	0	0	0	0	0	0	7496	7.22805	1	0	0	0	1	7.22805	8533	7.41498	1	0	0	0	1	7.41498	1677	5.06781	1	734	0.718736	0	1	0
3015	BC018002	H2AFZ	H2AFZ	387	0	0	*	3313	3430	0	0	0	21	0	0	0	0	5644	0.76858	0	8845	1.36665	0	0	0	5362	0.694633	0	6788	0.984778	0	0	0	0	0	0	0	0	0	0	0	3	0	0	3946	0.202182	0	0	0
440093	BC066906	LOC440093	H3F3C	408	0	0	*	1538	1542	0	0	0	7	0	0	0	0	548	-1.48881	0	0	0	0	0	0	188	0	0	0	0	0	0	0	0	0	0	2152	0.480875	0	0	0	380	0	0	0	0	0	0	0
23498	BC029510	HAAO	HAAO	861	0	0	*	6843	3402	0	0	0	0	0	0	0	0	4164	-0.716659	0	2902	-0.229336	0	0	0	0	0	0	0	0	0	0	0	0	0	0	3599	0.081213	0	0	0	0	0	0	0	0	0	0	0
151011	BC020502	40422	SEPTIN10	1365	0	0	*	50	1258	0	0	0	0	0	0	0	0	0	0	0	648	-0.957066	0	0	0	0	0	0	553	-1.18578	0	0	0	0	0	0	1006	-0.322502	0	0	0	0	0	0	0	0	0	0	0
26061	BC007440	HPCL2	HACL1	360	0	0	*	1745	3174	104	0	0	11683	1.88004	1	1	0	548	-1.67098	0	556	-2.51315	0	0	0	32	0	0	1779	-0.835236	0	0	0	0	0	0	5977	0.913119	0	0	0	0	0	0	3157	-0.00774787	0	0	0
5937	BC012992	RBMS1	RBMS1	1212	0	0	*	50	1017	4973	6.63604	1	0	0	0	1	6.63604	0	0	0	0	0	0	0	0	0	0	0	0	0	0	0	0	0	0	0	0	0	0	0	0	0	0	0	0	0	0	0	0
84264	BC015008	HAGHL	HAGHL	612	0	0	*	6621	7147	0	0	0	4412	-0.695905	0	0	0	3562	-0.894362	0	0	0	0	0	0	1	0	0	6546	-0.126724	0	0	0	4259	-0.636534	0	15103	1.07943	0	0	0	0	0	0	568	-3.65337	0	0	0
57817	BC020612	HAMP	HAMP	255	0	0	*	1339	91	0	0	0	0	0	0	0	0	0	0	0	0	0	0	0	0	0	0	0	0	0	0	0	0	0	0	0	0	0	0	0	0	0	0	0	0	0	0	0	0
79657	BC056415	FLJ21908	RPAP3	1896	0	0	*	1057	343	0	0	0	0	0	0	0	0	0	0	0	1327	1.95189	1	1	0	1800	0.768022	0	3579	3.38328	1	1	0	0	0	0	10747	4.96958	1	1	0	0	0	0	0	0	0	0	0
7633	BC062309	ZNF79	ZNF79	1497	1	1	C2H2 ZF	50	518	184	0	0	0	0	0	0	0	8493	7.4082	1	0	0	0	1	7.4082	13153	8.03925	1	0	0	0	1	8.03925	11003	7.78175	1	0	0	0	1	7.78175	11040	7.7866	1	0	0	0	1	7.7866
3038	BC021853	HAS3	HAS3	846	0	0	*	2195	1679	5202	1.24485	0	0	0	0	0	0	0	0	0	0	0	0	0	0	0	0	0	0	0	0	0	0	0	0	0	578	-1.53846	0	0	0	618	-1.82854	0	0	0	0	0	0
8520	BC063003	HAT1	HAT1	1005	0	0	*	2711	1230	1263	-1.10197	0	0	0	0	0	0	0	0	0	0	0	0	0	0	0	0	0	0	0	0	0	0	0	0	0	59	0	0	0	0	0	0	0	0	0	0	0	0
115106	BC005958	CCDC5	HAUS1	609	0	0	*	1412	2150	0	0	0	0	0	0	0	0	0	0	0	0	0	0	0	0	0	0	0	0	0	0	0	0	0	0	0	0	0	0	0	0	0	0	0	0	0	0	0	0
1407	BC030519	CRY1	CRY1	1761	1	1	NA	50	284	0	0	0	0	0	0	0	0	274	0	0	0	0	0	0	0	8763	7.45335	1	0	0	0	1	7.45335	628	3.65076	1	0	0	0	1	0	8822	7.46303	1	0	0	0	1	7.46303
10456	BC015209	HAX1	HAX1	840	1	0	NA	5604	4684	11	0	0	3437	-0.446591	0	0	0	164	0	0	5109	0.1253	0	0	0	21	0	0	9205	0.974677	0	0	0	6201	0.146044	0	4055	-0.208039	0	0	0	152	0	0	7352	0.650396	0	0	0
3043	BC007075	HBB	HBB	444	0	0	*	1163	1317	0	0	0	0	0	0	0	0	0	0	0	3751	1.51002	1	1	0	0	0	0	0	0	0	0	0	0	0	0	0	0	0	0	0	3	0	0	0	0	0	0	0
3045	BC069307	HBD	HBD	444	0	0	*	2538	2884	0	0	0	0	0	0	0	0	0	0	0	0	0	0	0	0	0	0	0	1886	-0.612741	0	0	0	6345	1.32193	0	0	0	0	0	0	0	0	0	0	0	0	0	0
4736	BC011366	RPL10A	RPL10A	654	0	0	*	4015	1214	0	0	0	12904	3.40998	1	1	0	0	0	0	7255	2.57921	1	1	0	0	0	0	3756	1.62943	1	1	0	0	0	0	768	-0.66059	0	0	0	0	0	0	388	0	0	0	0
3049	BC056686	HBQ1	HBQ1	429	0	0	*	3055	2391	1596	-0.936712	0	8335	1.80157	1	1	0	0	0	0	6221	1.37953	0	0	0	1672	-0.869598	0	4095	0.776249	0	0	0	2109	-0.534613	0	7629	1.67388	1	1	0	0	0	0	6023	1.33287	0	0	0
3050	BC027892	HBZ	HBZ	429	0	0	*	12073	10736	331	0	0	0	0	0	0	0	2575	-2.22914	0	5649	-0.926389	0	0	0	0	0	0	125	0	0	0	0	2106	-2.51921	0	15363	0.517003	0	0	0	0	0	0	6881	-0.641766	0	0	0
3052	BC001691	HCCS	HCCS	807	0	0	*	934	2175	10570	3.50041	1	2483	0.191069	0	1	0	0	0	0	0	0	0	0	0	0	0	0	0	0	0	0	0	0	0	0	0	0	0	0	0	0	0	0	0	0	0	0	0
6947	BC018632	TCN1	TCN1	1272	0	0	*	50	3190	9927	7.63329	1	0	0	0	1	7.63329	3671	6.1981	1	11361	1.83246	1	2	6.1981	0	0	0	0	0	0	0	0	11181	7.80491	1	0	0	0	1	7.80491	0	0	0	0	0	0	0	0
64098	BC034406	PARVG	PARVG	996	0	0	*	50	1008	0	0	0	0	0	0	0	0	7836	7.29205	1	0	0	0	1	7.29205	0	0	0	0	0	0	0	0	0	0	0	0	0	0	0	0	0	0	0	443	0	0	0	0
9349	BC062716	RPL23	RPL23	423	0	0	*	1568	1511	0	0	0	0	0	0	0	0	0	0	0	0	0	0	0	0	0	0	0	7173	2.24707	1	1	0	18	0	0	0	0	0	0	0	0	0	0	0	0	0	0	0
6157	BC005326	RPL27A	RPL27A	447	0	0	*	1320	693	4260	1.69032	1	0	0	0	1	0	0	0	0	1960	1.49993	0	0	0	0	0	0	2258	1.70412	1	1	0	0	0	0	0	0	0	0	0	0	0	0	0	0	0	0	0
10870	BC046348	HCST	HCST	282	0	0	*	5644	11148	16	0	0	15539	0.479109	0	0	0	9260	0.714294	0	10759	-0.0512409	0	0	0	2164	-1.38302	0	8563	-0.380597	0	0	0	0	0	0	9920	-0.168373	0	0	0	6516	0.207269	0	37880	1.76465	1	1	0
60680	BC047522	BRUNOL5	CELF5	1209	0	0	*	1232	696	710	-0.795111	0	3689	2.40607	1	1	0	8219	2.73796	1	4399	2.66002	1	2	2.73796	71	0	0	3499	2.32978	1	1	0	422	0	0	3459	2.3132	1	1	0	821	-0.585548	0	2035	1.54787	1	1	0
283377	BC020844	LOC283377	SPRYD4	624	0	0	*	50	206	0	0	0	0	0	0	0	0	0	0	0	0	0	0	0	0	0	0	0	0	0	0	0	0	0	0	0	0	0	0	0	0	3452	6.10936	1	0	0	0	1	6.10936
221060	BC029034	C10orf111	RPP38-DT	468	0	0	*	1666	265	0	0	0	0	0	0	0	0	384	0	0	0	0	0	0	0	0	0	0	856	1.69162	1	1	0	0	0	0	0	0	0	0	0	0	0	0	0	0	0	0	0
10205	BC017774	EVA1	MPZL2	648	0	0	*	50	477	0	0	0	8552	4.1642	1	1	0	5425	6.76155	1	0	0	0	1	6.76155	0	0	0	0	0	0	0	0	0	0	0	0	0	0	0	0	0	0	0	0	0	0	0	0
6188	BC071669	RPS3	RPS3	354	1	1	NA	1887	1798	0	0	0	0	0	0	0	0	329	0	0	0	0	0	0	0	0	0	0	9923	2.46438	1	1	0	0	0	0	763	-1.23664	0	0	0	0	0	0	0	0	0	0	0
55869	BC050433	HDAC8	HDAC8	1134	1	0	Unknown	362	156	0	0	0	0	0	0	0	0	0	0	0	0	0	0	0	0	0	0	0	0	0	0	0	0	0	0	0	0	0	0	0	0	0	0	0	0	0	0	0	0
3068	BC018991	HDGF	HDGF	723	1	1	NA	672	1579	278	0	0	0	0	0	0	0	7178	3.41705	1	0	0	0	1	0	1719	1.35504	0	21	0	0	0	0	1288	0.938599	0	20	0	0	0	0	0	0	0	0	0	0	0	0
50810	BC015483	HDGFRP3	HDGFL3	612	0	0	*	3190	2375	10437	1.71008	1	2305	-0.0431608	0	1	0	7671	1.26586	0	2902	0.28912	0	0	0	0	0	0	1626	-0.5466	0	0	0	109	0	0	3384	0.510802	0	0	0	2046	-0.64075	0	2174	-0.127576	0	0	0
84064	BC011894	HDHD2	HDHD2	510	0	0	*	469	580	0	0	0	0	0	0	0	0	0	0	0	0	0	0	0	0	0	0	0	3	0	0	0	0	3	0	0	0	0	0	0	0	0	0	0	0	0	0	0	0
6193	BC018151	RPS5	RPS5	615	0	0	*	9647	2746	1604	-2.58841	0	19933	2.85976	1	1	0	0	0	0	46	0	0	0	0	1007	-3.26002	0	17429	2.66609	1	1	0	1487	-2.69768	0	0	0	0	0	0	0	0	0	14	0	0	0	0
55127	BC062442	HEATR1	HEATR1	363	0	0	*	2731	2437	0	0	0	543	-2.16608	0	0	0	8164	1.57985	1	0	0	0	1	0	0	0	0	0	0	0	0	0	6265	1.19789	0	1073	-1.18346	0	0	0	566	-2.27056	0	429	0	0	0	0
256957	BC033734	FLJ32830	HEATR9	660	0	0	*	879	755	0	0	0	0	0	0	0	0	0	0	0	0	0	0	0	0	0	0	0	0	0	0	0	0	0	0	0	0	0	0	0	0	0	0	0	0	0	0	0	0
23593	BC010290	HEBP2	HEBP2	618	0	0	*	585	1021	29	0	0	0	0	0	0	0	548	-0.0942607	0	0	0	0	0	0	210	0	0	0	0	0	0	0	0	0	0	3216	1.65528	1	1	0	0	0	0	0	0	0	0	0
9843	BC011561	HEPH	HEPH	3477	0	0	*	3706	3633	9049	1.2879	0	0	0	0	0	0	0	0	0	7980	1.13523	0	0	0	0	0	0	0	0	0	0	0	138	0	0	0	0	0	0	0	7943	1.09982	0	97	0	0	0	0
440248	BC047911	LOC440248	HERC2P9	1281	0	0	*	124	602	0	0	0	0	0	0	0	0	0	0	0	0	0	0	0	0	0	0	0	0	0	0	0	0	0	0	0	0	0	0	0	0	0	0	0	0	0	0	0	0
8916	BC038960	HERC3	HERC3	1107	0	0	*	2248	1180	0	0	0	0	0	0	0	0	0	0	0	0	0	0	0	0	0	0	0	0	0	0	0	0	0	0	0	0	0	0	0	0	0	0	0	429	0	0	0	0
9709	BC008320	HERPUD1	HERPUD1	1176	0	0	*	50	353	0	0	0	1089	1.62526	1	1	0	0	0	0	0	0	0	0	0	0	0	0	0	0	0	0	0	0	0	0	0	0	0	0	0	0	0	0	0	0	0	0	0
27079	BC016967	RPUSD2	RPUSD2	1536	0	0	*	662	50	0	0	0	0	0	0	0	0	0	0	0	0	0	0	0	0	0	0	0	2579	5.68874	1	1	0	0	0	0	0	0	0	0	0	0	0	0	0	0	0	0	0
221035	BC068557	C10orf74	REEP3	768	0	0	*	50	462	4973	6.63604	1	0	0	0	1	6.63604	0	0	0	0	0	0	0	0	0	0	0	0	0	0	0	0	0	0	0	0	0	0	0	0	0	0	0	0	0	0	0	0
84881	BC014131	RPUSD4	RPUSD4	1134	0	0	*	1840	262	0	0	0	0	0	0	0	0	0	0	0	6251	4.57645	1	1	0	0	0	0	1320	2.3329	1	1	0	0	0	0	0	0	0	0	0	0	0	0	0	0	0	0	0
23378	BC001071	KIAA0409	RRP8	1371	0	0	*	269	81	0	0	0	284	1.8099	1	1	0	0	0	0	0	0	0	0	0	0	0	0	886	3.45131	1	1	0	0	0	0	0	0	0	0	0	0	0	0	0	0	0	0	0
51377	BC025369	UCHL5	UCHL5	981	0	0	*	50	2831	0	0	0	0	0	0	0	0	0	0	0	0	0	0	0	0	4	0	0	31	0	0	0	0	0	0	0	0	0	0	0	0	4483	6.48639	1	665	-2.08989	0	1	6.48639
51507	BC003359	C20orf43	RTF2	921	0	0	*	989	836	0	0	0	0	0	0	0	0	0	0	0	0	0	0	0	0	0	0	0	3924	2.23075	1	1	0	0	0	0	0	0	0	0	0	0	0	0	0	0	0	0	0
3082	BC022308	HGF	HGF	858	0	0	*	813	708	0	0	0	0	0	0	0	0	0	0	0	0	0	0	0	0	0	0	0	0	0	0	0	0	0	0	0	0	0	0	0	0	0	0	0	0	0	0	0	0
138050	BC012452	TMEM76	HGSNAT	621	0	0	*	486	144	0	0	0	0	0	0	0	0	0	0	0	0	0	0	0	0	0	0	0	0	0	0	0	0	0	0	0	0	0	0	0	0	0	0	0	0	0	0	0	0
3087	BC014336	HHEX	HHEX	813	1	1	Homeodomain	2552	755	0	0	0	0	0	0	0	0	0	0	0	0	0	0	0	0	0	0	0	0	0	0	0	0	0	0	0	3037	2.0081	1	1	0	582	-2.13254	0	0	0	0	0	0
79802	BC016552	KIAA1822L	HHIPL2	1590	0	0	*	7167	2787	0	0	0	1000	-1.47871	0	0	0	0	0	0	0	0	0	0	0	0	0	0	4236	0.60399	0	0	0	0	0	0	4644	0.736655	0	0	0	44	0	0	0	0	0	0	0
6252	BC000314	RTN1	RTN1	600	0	0	*	577	134	0	0	0	0	0	0	0	0	0	0	0	0	0	0	0	0	0	0	0	2695	4.32998	1	1	0	0	0	0	0	0	0	0	0	0	0	0	0	0	0	0	0
51751	BC020667	HIGD1B	HIGD1B	300	0	0	*	6252	2768	0	0	0	589	-2.2325	0	0	0	6137	-0.0267842	0	3288	0.248366	0	0	0	968	-2.69124	0	1718	-0.688114	0	0	0	6113	-0.0324372	0	0	0	0	0	0	0	0	0	1274	-1.11948	0	0	0
51501	BC018080	HSPC138	HIKESHI	594	0	0	*	440	415	7661	4.12196	1	0	0	0	1	0	0	0	0	0	0	0	0	0	0	0	0	183	0	0	0	0	0	0	0	0	0	0	0	0	0	0	0	0	0	0	0	0
84681	BC047737	HINT2	HINT2	492	0	0	*	50	640	0	0	0	0	0	0	0	0	0	0	0	849	0.407693	0	0	0	0	0	0	0	0	0	0	0	0	0	0	0	0	0	0	0	0	0	0	0	0	0	0	0
204851	BC036057	HIPK1	HIPK1	2451	1	0	NA	50	715	5	0	0	0	0	0	0	0	0	0	0	479	0	0	0	0	0	0	0	0	0	0	0	0	0	0	0	0	0	0	0	0	0	0	0	0	0	0	0	0
29093	BC012565	MRPL22	MRPL22	621	0	0	*	50	1164	1970	5.30012	1	0	0	0	1	0	0	0	0	4816	2.04874	1	1	0	0	0	0	0	0	0	0	0	0	0	0	0	0	0	0	0	3	0	0	0	0	0	0	0
3006	BC002649	HIST1H1C	HIST1H1C	642	1	1	Unknown	938	615	2429	1.3727	0	0	0	0	0	0	1096	0.224588	0	0	0	0	0	0	707	-0.407878	0	593	-0.0525543	0	0	0	0	0	0	1347	1.13109	0	0	0	0	0	0	678	0.140699	0	0	0
253827	BC040053	MSRB3	MSRB3	558	0	0	*	100	350	16	0	0	0	0	0	0	0	2027	4.34127	1	0	0	0	1	0	112	0	0	0	0	0	0	0	0	0	0	0	0	0	0	0	0	0	0	0	0	0	0	0
57142	BC014366	RTN4	RTN4	600	0	0	*	5665	2546	0	0	0	0	0	0	0	0	4658	-0.282365	0	8721	1.77626	1	1	0	3442	-0.718829	0	8480	1.73583	1	1	0	0	0	0	13399	2.39582	1	1	0	0	0	0	4707	0.886575	0	0	0
80183	BC043488	C13orf18	RUBCNL	1788	0	0	*	150	315	0	0	0	0	0	0	0	0	0	0	0	0	0	0	0	0	190	0	0	14217	5.49612	1	1	0	0	0	0	0	0	0	0	0	0	0	0	0	0	0	0	0
23210	BC066654	PTDSR	JMJD6	1212	0	0	*	50	624	0	0	0	0	0	0	0	0	0	0	0	0	0	0	0	0	0	0	0	0	0	0	0	0	0	0	0	0	0	0	0	0	11639	7.86282	1	0	0	0	1	7.86282
8341	BC009783	HIST1H2BN	HIST1H2BN	381	1	0	NA	3268	3892	5955	0.865694	0	7229	0.893284	0	0	0	2192	-0.57616	0	38126	3.29219	1	1	0	5768	0.819663	0	10317	1.40644	0	0	0	6664	1.02798	0	5049	0.375486	0	0	0	5867	0.844215	0	18151	2.22147	1	1	0
6286	BC006819	S100P	S100P	288	0	0	*	7129	5128	1289	-2.46745	0	1227	-2.06326	0	0	0	0	0	0	9987	0.961655	0	0	0	1801	-1.9849	0	16280	1.66663	1	1	0	3447	-1.04836	0	2467	-1.05564	0	0	0	75	0	0	4043	-0.34297	0	0	0
8353	BC052981	HIST1H3E	HIST1H3E	411	0	0	*	50	796	0	0	0	0	0	0	0	0	0	0	0	0	0	0	0	0	0	0	0	0	0	0	0	0	1091	4.44758	1	0	0	0	1	0	0	0	0	0	0	0	0	0
8968	BC067492	HIST1H3F	HIST1H3F	411	0	0	*	1380	5346	8264	2.58217	1	890	-2.58658	0	1	0	0	0	0	1605	-1.73589	0	0	0	0	0	0	2029	-1.39769	0	0	0	5209	1.91634	1	0	0	0	1	0	7370	2.417	1	0	0	0	1	0
8355	BC012185	HIST1H3G	HIST1H3G	411	0	0	*	2035	1289	0	0	0	0	0	0	0	0	0	0	0	0	0	0	0	0	4858	1.25533	0	2295	0.832242	0	0	0	0	0	0	3496	1.43945	0	0	0	0	0	0	5967	2.21075	1	1	0
1903	BC060827	EDG3	S1PR3	1137	0	0	*	1350	331	534	-1.33805	0	0	0	0	0	0	0	0	0	3149	3.24999	1	1	0	1145	-0.237612	0	3087	3.2213	1	1	0	0	0	0	0	0	0	0	0	0	0	0	457	0	0	0	0
9650	BC043498	MTFR1	MTFR1	1002	0	0	*	50	50	0	0	0	0	0	0	0	0	0	0	0	0	0	0	0	0	0	0	0	0	0	0	0	0	0	0	0	1763	5.13996	1	1	0	0	0	0	1149	4.52231	1	1	0
3663	BC004139	IRF5	IRF5	1497	1	1	IRF	50	122	5528	6.78869	1	167	0.452967	0	1	6.78869	164	0	0	4075	5.06185	1	1	0	7036	7.13668	1	0	0	0	1	7.13668	1458	4.86592	1	0	0	0	1	0	7361	7.20183	1	0	0	0	1	7.20183
8364	BC054014	HIST1H4C	HIST1H4C	312	0	0	*	3654	3605	0	0	0	6026	0.741201	0	0	0	5973	0.708979	0	0	0	0	0	0	0	0	0	0	0	0	0	0	11223	1.61891	1	550	-2.7125	0	1	0	0	0	0	4680	0.376509	0	0	0
8367	BC012587	HIST1H4E	HIST1H4E	312	0	0	*	3884	2525	149	0	0	0	0	0	0	0	23233	2.58056	1	2886	0.192788	0	1	0	6593	0.763392	0	4144	0.714741	0	0	0	14109	1.861	1	0	0	0	1	0	0	0	0	38295	3.9228	1	1	0
2258	BC034340	FGF13	FGF13	738	0	0	*	1030	50	0	0	0	2508	5.64847	1	1	0	986	-0.0629848	0	9493	7.56879	1	1	7.56879	0	0	0	1546	4.95047	1	1	0	1162	0.173966	0	6916	7.11187	1	1	0	0	0	0	3710	6.21335	1	1	6.21335
8368	BC069392	HIST1H4L	HIST1H4L	312	0	0	*	4996	2665	4183	-0.256235	0	990	-1.42864	0	0	0	4384	-0.188526	0	5788	1.11893	0	0	0	0	0	0	6427	1.27001	0	0	0	0	0	0	0	0	0	0	0	141	0	0	2091	-0.349942	0	0	0
8995	BC069319	TNFSF18	TNFSF18	534	1	0	Unknown	50	1866	0	0	0	0	0	0	0	0	0	0	0	0	0	0	0	0	0	0	0	0	0	0	0	0	0	0	0	0	0	0	0	0	0	0	0	0	0	0	0	0
10614	BC006460	HEXIM1	HEXIM1	1080	1	0	NA	82	1763	10215	6.96085	1	2472	0.487646	0	1	6.96085	2411	4.87786	1	0	0	0	1	0	6296	6.26267	1	107	0	0	1	6.26267	8163	6.63733	1	0	0	0	1	6.63733	9249	6.81753	1	0	0	0	1	6.81753
126961	BC015544	HIST2H3C	HIST2H3C	411	0	0	*	1927	1411	3366	0.804679	0	0	0	0	0	0	164	0	0	3303	1.22706	0	0	0	1456	-0.404346	0	0	0	0	0	0	0	0	0	4748	1.7506	1	1	0	571	-1.75479	0	0	0	0	0	0
92815	BC001193	HIST3H2A	HIST3H2A	393	0	0	*	5849	8923	4802	-0.284555	0	12928	0.534898	0	0	0	0	0	0	20776	1.21932	0	0	0	14150	1.27454	0	22789	1.35274	0	0	0	28863	2.30296	1	8637	-0.0469986	0	1	0	5110	-0.194867	0	10342	0.212914	0	0	0
63894	BC015054	C14orf133	VIPAS39	1482	0	0	*	50	156	0	0	0	21	0	0	0	0	0	0	0	0	0	0	0	0	0	0	0	0	0	0	0	0	0	0	0	0	0	0	0	0	0	0	0	0	0	0	0	0
51282	BC000785	SCAND1	SCAND1	540	1	0	Unknown	1892	1554	8	0	0	12297	2.98425	1	1	0	0	0	0	11129	2.84027	1	1	0	0	0	0	10895	2.80961	1	1	0	2496	0.399706	0	87	0	0	0	0	0	0	0	0	0	0	0	0
387	BC005976	RHOA	RHOA	582	1	1	NA	50	1994	10669	7.73728	1	220	-3.18009	0	1	7.73728	0	0	0	0	0	0	0	0	63	0	0	1002	-0.992783	0	0	0	0	0	0	0	0	0	0	0	0	0	0	0	0	0	0	0
83861	BC050604	RSHL2	RSPH3	1683	0	0	*	50	321	7882	7.30049	1	0	0	0	1	7.30049	0	0	0	0	0	0	0	0	0	0	0	0	0	0	0	0	0	0	0	0	0	0	0	0	0	0	0	0	0	0	0	0
3109	BC027175	HLA-DMB	HLA-DMB	792	0	0	*	1388	4169	0	0	0	5554	0.413826	0	0	0	8493	2.61327	1	1065	-1.96885	0	1	0	0	0	0	859	-2.27897	0	0	0	0	0	0	6801	0.706046	0	0	0	3	0	0	4250	0.0277615	0	0	0
3111	BC013183	HLA-DOA	HLA-DOA	753	0	0	*	3728	3511	0	0	0	9559	1.44498	0	0	0	0	0	0	216	0	0	0	0	0	0	0	553	-2.66653	0	0	0	0	0	0	28	0	0	0	0	0	0	0	4984	0.505422	0	0	0
3112	BC020226	HLA-DOB	HLA-DOB	300	0	0	*	2493	6707	7127	1.51541	1	355	-4.23978	0	1	0	28493	3.51465	1	8783	0.389046	0	1	0	2020	-0.303528	0	13257	0.983015	0	0	0	9709	1.96144	1	6991	0.0598312	0	1	0	4267	0.775339	0	17791	1.40741	0	0	0
3115	BC013184	HLA-DPB1	HLA-DPB1	777	0	0	*	5415	3455	1543	-1.81122	0	4150	0.264426	0	0	0	1479	-1.87234	0	1791	-0.94792	0	0	0	5843	0.109748	0	4923	0.510852	0	0	0	0	0	0	1257	-1.4587	0	0	0	0	0	0	457	0	0	0	0
3116	BC017967	HLA-DPB2	HLA-DPB2	474	0	0	*	8021	9219	699	-3.52042	0	429	-4.42556	0	0	0	438	0	0	5495	-0.746491	0	0	0	3954	-1.02047	0	15234	0.724613	0	0	0	8929	0.154716	0	8763	-0.0731854	0	0	0	3383	-1.24548	0	25226	1.45223	0	0	0
3117	BC008585	HLA-DQA1	HLA-DQA1	765	0	0	*	2200	1994	0	0	0	0	0	0	0	0	0	0	0	0	0	0	0	0	1375	-0.678072	0	0	0	0	0	0	0	0	0	0	0	0	0	0	0	0	0	0	0	0	0	0
3119	BC012106	HLA-DQB1	HLA-DQB1	786	1	1	Unknown	4838	3002	0	0	0	0	0	0	0	0	2082	-1.21644	0	16161	2.42852	1	1	0	0	0	0	0	0	0	0	0	0	0	0	0	0	0	0	0	0	0	0	0	0	0	0	0
3120	BC031995	HLA-DQB2	HLA-DQB2	696	1	1	Unknown	8612	2291	1436	-2.58429	0	9647	2.0741	1	1	0	0	0	0	0	0	0	0	0	4209	-1.03287	0	4040	0.818378	0	0	0	440	0	0	246	0	0	0	0	0	0	0	0	0	0	0	0
3123	BC031023	HLA-DRB1	HLA-DRB1	801	1	0	Unknown	16929	14512	28489	0.750908	0	11818	-0.29626	0	0	0	15781	-0.101308	0	12117	-0.260214	0	0	0	1748	-3.27572	0	5253	-1.46603	0	0	0	0	0	0	16836	0.214303	0	0	0	1991	-3.08793	0	13236	-0.132779	0	0	0
3125	BC001023	HLA-DRB3	HLA-DRB3	801	1	1		8316	5140	7106	-0.226852	0	25	0	0	0	0	0	0	0	293	0	0	0	0	2035	-2.03086	0	623	-3.04446	0	0	0	35	0	0	1570	-1.711	0	0	0	6	0	0	14	0	0	0	0
3126	BC005312	HLA-DRB4	HLA-DRB4	801	1	1	NA	2608	2996	48	0	0	6654	1.15118	0	0	0	5589	1.09965	0	5804	0.95401	0	0	0	1342	-0.958559	0	3395	0.180374	0	0	0	0	0	0	8735	1.54377	1	1	0	0	0	0	55	0	0	0	0
3127	BC009234	HLA-DRB5	HLA-DRB5	801	1	1	Unknown	1687	1127	379	0	0	990	-0.186987	0	0	0	0	0	0	0	0	0	0	0	0	0	0	0	0	0	0	0	9	0	0	2272	1.01148	0	0	0	0	0	0	1606	0.510984	0	0	0
3133	BC002578	HLA-E	HLA-E	1077	0	0	*	4498	2032	0	0	0	0	0	0	0	0	0	0	0	14618	2.84677	1	1	0	0	0	0	1617	-0.329581	0	0	0	0	0	0	8067	1.98913	1	1	0	0	0	0	415	0	0	0	0
7439	BC015220	VMD2	BEST1	1497	0	0	*	50	50	0	0	0	507	3.34199	1	1	0	110	0	0	4924	6.62176	1	1	6.62176	386	0	0	0	0	0	0	0	0	0	0	1330	4.73335	1	1	0	0	0	0	0	0	0	0	0
6303	BC008424	SAT	SAT1	516	0	0	*	181	2119	12281	6.08429	1	5001	1.23883	0	1	6.08429	0	0	0	31	0	0	0	0	0	0	0	0	0	0	0	0	6151	5.08676	1	0	0	0	1	0	0	0	0	2644	0.319339	0	0	0
81502	BC062595	HM13	HM13	1134	0	0	*	195	893	0	0	0	0	0	0	0	0	0	0	0	0	0	0	0	0	0	0	0	0	0	0	0	0	0	0	0	0	0	0	0	0	0	0	0	0	0	0	0	0
3145	BC008149	HMBS	HMBS	1086	0	0	*	166	69	0	0	0	0	0	0	0	0	0	0	0	0	0	0	0	0	129	0	0	0	0	0	0	0	0	0	0	0	0	0	0	0	0	0	0	0	0	0	0	0
54581	BC011547	SCAND2	SCAND2P	459	1	0	Unknown	2863	2600	12289	2.10177	1	2107	-0.303321	0	1	0	0	0	0	0	0	0	0	0	3351	0.227064	0	7386	1.50628	1	1	0	0	0	0	444	0	0	0	0	0	0	0	0	0	0	0	0
6338	BC036352	SCNN1B	SCNN1B	1923	0	0	*	1220	1242	0	0	0	0	0	0	0	0	658	-0.890722	0	0	0	0	0	0	0	0	0	4538	1.86939	1	1	0	0	0	0	0	0	0	0	0	0	0	0	0	0	0	0	0
5534	BC027913	PPP3R1	PPP3R1	513	1	1	NA	50	2281	625	3.64386	1	0	0	0	1	0	0	0	0	0	0	0	0	0	1	0	0	0	0	0	0	0	0	0	0	6500	1.51077	1	1	0	0	0	0	3323	0.54282	0	0	0
55707	BC017014	NECAP2	NECAP2	792	0	0	*	50	649	0	0	0	0	0	0	0	0	7836	7.29205	1	0	0	0	1	7.29205	0	0	0	0	0	0	0	0	0	0	0	296	0	0	0	0	177	0	0	0	0	0	0	0
3155	BC010570	HMGCL	HMGCL	978	0	0	*	201	955	0	0	0	0	0	0	0	0	0	0	0	0	0	0	0	0	0	0	0	0	0	0	0	0	0	0	0	0	0	0	0	0	0	0	0	0	0	0	0	0
6385	BC030805	SDC4	SDC4	597	0	0	*	224	534	0	0	0	0	0	0	0	0	0	0	0	0	0	0	0	0	0	0	0	2943	2.46238	1	1	0	1692	2.91716	1	11	0	0	1	0	0	0	0	3198	2.58226	1	1	0
9324	BC009529	HMGN3	HMGN3	234	1	1	HMG/Sox	5952	4385	184	0	0	0	0	0	0	0	0	0	0	432	0	0	0	0	5242	-0.183257	0	7765	0.824409	0	0	0	0	0	0	293	0	0	0	0	0	0	0	1454	-1.59255	0	0	0
10473	BC001282	HMGN4	HMGN4	273	1	0	NA	1807	790	0	0	0	3192	2.01454	1	1	0	0	0	0	31	0	0	0	0	688	-1.39312	0	700	-0.174498	0	0	0	5614	1.63543	1	25	0	0	1	0	0	0	0	955	0.273648	0	0	0
3162	BC001491	HMOX1	HMOX1	867	1	0	Unknown	1040	91	0	0	0	0	0	0	0	0	110	0	0	2115	4.53865	1	1	0	0	0	0	0	0	0	0	0	1074	0.0464105	0	0	0	0	0	0	0	0	0	0	0	0	0	0
3163	BC002396	HMOX2	HMOX2	951	1	1	NA	1564	337	0	0	0	0	0	0	0	0	0	0	0	1420	2.07507	1	1	0	1664	0.0894149	0	862	1.35494	0	0	0	0	0	0	0	0	0	0	0	0	0	0	4389	3.70307	1	1	0
3176	BC020677	HNMT	HNMT	879	0	0	*	3075	1095	0	0	0	0	0	0	0	0	0	0	0	0	0	0	0	0	1077	-1.51357	0	0	0	0	0	0	1904	-0.691553	0	6125	2.48378	1	1	0	0	0	0	3683	1.74995	1	1	0
10949	BC011972	HNRPA0	HNRNPA0	918	0	0	*	1913	3012	0	0	0	2586	-0.219999	0	0	0	329	0	0	4245	0.495043	0	0	0	326	0	0	1421	-1.08382	0	0	0	0	0	0	8900	1.56308	1	1	0	0	0	0	4513	0.583365	0	0	0
3183	BC008423	HNRPC	HNRNPC	921	1	1	NA	1738	712	0	0	0	0	0	0	0	0	0	0	0	0	0	0	0	0	0	0	0	0	0	0	0	0	1279	-0.442412	0	95	0	0	0	0	965	-0.848827	0	3254	2.19227	1	1	0
3185	BC001432	HNRPF	HNRNPF	1248	0	0	*	5881	4844	0	0	0	19004	1.97203	1	1	0	16110	1.45382	0	0	0	0	0	0	11	0	0	0	0	0	0	0	1745	-1.75283	0	0	0	0	0	0	4830	-0.284038	0	0	0	0	0	0
112817	BC057821	C10orf65	HOGA1	495	0	0	*	7043	6953	8163	0.212909	0	50	-7.11956	0	0	0	55	0	0	5125	-0.440084	0	0	0	1450	-2.28014	0	2659	-1.38675	0	0	0	1514	-2.21782	0	4334	-0.681936	0	0	0	9568	0.442027	0	8529	0.294741	0	0	0
9456	BC015502	HOMER1	HOMER1	1065	0	0	*	166	412	0	0	0	0	0	0	0	0	0	0	0	0	0	0	0	0	0	0	0	0	0	0	0	0	0	0	0	0	0	0	0	0	0	0	0	0	0	0	0	0
5356	BC020786	PLRG1	PLRG1	1518	1	1	NA	50	172	15330	8.26021	1	0	0	0	1	8.26021	0	0	0	0	0	0	0	0	13253	8.05018	1	0	0	0	1	8.05018	0	0	0	0	0	0	0	0	11190	7.80607	1	0	0	0	1	7.80607
84525	BC014225	HOP	HOPX	222	1	0	Homeodomain	11397	10040	19008	0.737953	0	11	0	0	0	0	20438	0.8426	0	6931	-0.534624	0	0	0	10567	-0.109088	0	18129	0.85254	0	0	0	5629	-1.0177	0	7028	-0.514573	0	0	0	12679	0.153787	0	0	0	0	0	0
11264	BC001147	PXMP4	PXMP4	639	0	0	*	50	883	0	0	0	0	0	0	0	0	0	0	0	77	0	0	0	0	0	0	0	1042	0.23887	0	0	0	637	3.67129	1	0	0	0	1	0	1381	4.78764	1	0	0	0	1	0
27300	BC067271	ZNF544	ZNF544	2148	1	1	C2H2 ZF	50	50	9265	7.53372	1	0	0	0	1	7.53372	10411	7.70196	1	3319	6.05268	1	2	7.70196	6662	7.05788	1	0	0	0	1	7.05788	7506	7.22997	1	0	0	0	1	7.22997	24659	8.94597	1	0	0	0	1	8.94597
347735	BC017085	TDE2L	SERINC2	321	0	0	*	4155	4082	211	0	0	17990	2.13985	1	1	0	8931	1.10397	0	0	0	0	0	0	0	0	0	16640	2.02731	1	1	0	0	0	0	2180	-0.904948	0	0	0	0	0	0	0	0	0	0	0
23411	BC012499	SIRT1	SIRT1	1668	1	0	Unknown	50	840	3705	6.2114	1	21	0	0	1	6.2114	0	0	0	6329	2.91352	1	1	0	0	0	0	31	0	0	0	0	0	0	0	0	0	0	0	0	0	0	0	568	-0.564498	0	0	0
404266	BC010732	LOC404266	HOXB-AS3	162	0	0	*	1174	371	376	0	0	0	0	0	0	0	0	0	0	911	1.29603	0	0	0	0	0	0	0	0	0	0	0	79	0	0	0	0	0	0	0	0	0	0	0	0	0	0	0
5054	BC010860	SERPINE1	SERPINE1	1209	0	0	*	1391	1042	0	0	0	0	0	0	0	0	0	0	0	0	0	0	0	0	0	0	0	4254	2.02946	1	1	0	0	0	0	6329	2.60262	1	1	0	0	0	0	0	0	0	0	0
6419	BC011635	SETMAR	SETMAR	1059	0	0	*	669	1167	6249	3.22355	1	0	0	0	1	0	493	0	0	0	0	0	0	0	0	0	0	6714	2.52437	1	1	0	0	0	0	4035	1.78976	1	1	0	0	0	0	0	0	0	0	0
94081	BC063241	SFXN1	SFXN1	969	0	0	*	629	1248	0	0	0	0	0	0	0	0	0	0	0	0	0	0	0	0	0	0	0	16182	3.6967	1	1	0	0	0	0	0	0	0	0	0	0	0	0	0	0	0	0	0
9071	BC010920	CLDN10	CLDN10	687	0	0	*	50	50	0	0	0	0	0	0	0	0	0	0	0	0	0	0	0	0	0	0	0	0	0	0	0	0	0	0	0	0	0	0	0	0	0	0	0	4126	6.36667	1	1	6.36667
6456	BC032825	SH3GL2	SH3GL2	840	0	0	*	1846	1114	2792	0.596896	0	9566	3.10217	1	1	0	0	0	0	0	0	0	0	0	0	0	0	5006	2.16791	1	1	0	0	0	0	0	0	0	0	0	0	0	0	6369	2.51532	1	1	0
53358	BC026314	SHC3	SHC3	1785	0	0	*	1065	1011	0	0	0	7	0	0	0	0	0	0	0	2084	1.04357	0	0	0	0	0	0	14730	3.8649	1	1	0	1118	0.0700668	0	2015	0.994997	0	0	0	0	0	0	0	0	0	0	0
51548	BC028220	SIRT6	SIRT6	987	1	0	Unknown	5011	4135	0	0	0	2706	-0.611725	0	0	0	5370	0.0998236	0	4785	0.210632	0	0	0	1024	-2.29088	0	14327	1.79278	1	1	0	4423	-0.180073	0	0	0	0	0	0	39	0	0	69	0	0	0	0
7884	BC015703	SLBP	SLBP	813	0	0	*	2062	100	0	0	0	348	1.79909	1	1	0	0	0	0	1497	3.904	1	1	0	0	0	0	1620	4.01792	1	1	0	0	0	0	0	0	0	0	0	0	0	0	0	0	0	0	0
10723	BC007760	SLC12A7	SLC12A7	801	0	0	*	1725	690	0	0	0	0	0	0	0	0	0	0	0	0	0	0	0	0	0	0	0	2191	1.66692	1	1	0	0	0	0	17	0	0	0	0	0	0	0	0	0	0	0	0
117247	BC017968	SLC16A10	SLC16A10	606	0	0	*	1966	1139	2458	0.322222	0	301	-1.91993	0	0	0	0	0	0	0	0	0	0	0	0	0	0	4969	2.12519	1	1	0	3444	0.808822	0	0	0	0	0	0	0	0	0	0	0	0	0	0
51440	BC030827	HPCAL4	HPCAL4	576	0	0	*	1759	1214	91	0	0	0	0	0	0	0	0	0	0	0	0	0	0	0	0	0	0	0	0	0	0	0	205	0	0	1311	0.110899	0	0	0	0	0	0	0	0	0	0	0
83733	BC031644	SLC25A18	SLC25A18	948	0	0	*	2195	1102	0	0	0	0	0	0	0	0	0	0	0	0	0	0	0	0	0	0	0	7148	2.69742	1	1	0	0	0	0	0	0	0	0	0	0	0	0	0	0	0	0	0
27306	BC020734	PGDS	HPGDS	600	0	0	*	1842	652	0	0	0	2242	1.78184	1	1	0	55	0	0	0	0	0	0	0	897	-1.03809	0	180	0	0	0	0	0	0	0	0	0	0	0	0	0	0	0	0	0	0	0	0
3251	BC000578	HPRT1	HPRT1	657	0	0	*	1387	2425	0	0	0	0	0	0	0	0	0	0	0	0	0	0	0	0	0	0	0	0	0	0	0	0	0	0	0	0	0	0	0	0	0	0	0	0	0	0	0	0
11001	BC057770	SLC27A2	SLC27A2	1704	0	0	*	162	240	0	0	0	0	0	0	0	0	0	0	0	1281	2.41616	1	1	0	0	0	0	9844	5.35814	1	1	0	0	0	0	2794	3.54123	1	1	0	0	0	0	5718	4.5744	1	1	0
64342	BC050636	HS1BP3	HS1BP3	1179	0	0	*	4459	4962	6145	0.462693	0	2337	-1.08626	0	0	0	2630	-0.761657	0	9339	0.912346	0	0	0	0	0	0	0	0	0	0	0	6092	0.450196	0	2146	-1.20927	0	0	0	10849	1.28277	0	12793	1.36636	0	0	0
9653	BC025990	HS2ST1	HS2ST1	690	0	0	*	50	874	0	0	0	0	0	0	0	0	0	0	0	3936	2.17103	1	1	0	0	0	0	0	0	0	0	0	0	0	0	0	0	0	0	0	0	0	0	0	0	0	0	0
9957	BC057803	HS3ST1	HS3ST1	924	0	0	*	1015	627	723	-0.489412	0	0	0	0	0	0	0	0	0	0	0	0	0	0	0	0	0	0	0	0	0	0	0	0	0	140	0	0	0	0	0	0	0	0	0	0	0	0
3028	BC000372	HADH2	HSD17B10	786	0	0	*	774	1089	0	0	0	0	0	0	0	0	0	0	0	0	0	0	0	0	1950	1.33307	0	0	0	0	0	0	0	0	0	0	0	0	0	0	0	0	0	0	0	0	0	0
51170	BC036001	DHRS8	HSD17B11	903	0	0	*	8477	4400	924	-3.19759	0	1011	-2.12172	0	0	0	0	0	0	7054	0.680938	0	0	0	3768	-1.16975	0	0	0	0	0	0	0	0	0	5315	0.272566	0	0	0	3	0	0	10965	1.31733	0	0	0
3293	BC034281	HSD17B3	HSD17B3	933	0	0	*	3018	4070	0	0	0	4	0	0	0	0	10685	1.82392	1	0	0	0	1	0	0	0	0	0	0	0	0	0	0	0	0	0	0	0	0	0	4971	0.719943	0	11062	1.44251	0	0	0
5860	BC000576	QDPR	QDPR	735	0	0	*	50	315	0	0	0	0	0	0	0	0	0	0	0	0	0	0	0	0	0	0	0	0	0	0	0	0	0	0	0	0	0	0	0	0	0	0	0	0	0	0	0	0
54981	BC001366	C9orf95	NMRK1	600	0	0	*	50	315	0	0	0	0	0	0	0	0	0	0	0	0	0	0	0	0	0	0	0	0	0	0	0	0	0	0	0	0	0	0	0	0	6870	7.10224	1	0	0	0	1	7.10224
144608	BC038836	MGC47869	C12orf60	738	0	0	*	1546	165	638	-1.27691	0	0	0	0	0	0	0	0	0	0	0	0	0	0	0	0	0	0	0	0	0	0	5805	1.90876	1	0	0	0	1	0	0	0	0	8155	5.62715	1	1	0
113235	BC010691	MGC9564	SLC46A1	1296	0	0	*	173	81	0	0	0	1252	3.95017	1	1	0	0	0	0	15	0	0	0	0	0	0	0	798	3.30039	1	1	0	0	0	0	0	0	0	0	0	0	0	0	0	0	0	0	0
6529	BC033904	SLC6A1	SLC6A1	1800	0	0	*	1297	1255	0	0	0	0	0	0	0	0	0	0	0	0	0	0	0	0	0	0	0	4969	1.98527	1	1	0	0	0	0	7696	2.61642	1	1	0	0	0	0	13416	3.4182	1	1	0
3308	BC002526	HSPA4	HSPA4	447	0	0	*	1037	387	0	0	0	0	0	0	0	0	0	0	0	0	0	0	0	0	0	0	0	0	0	0	0	0	0	0	0	0	0	0	0	0	0	0	0	0	0	0	0	0
3312	BC007276	HSPA8	HSPA8	1761	0	0	*	273	702	10712	5.29418	1	0	0	0	1	0	0	0	0	1158	0.722092	0	0	0	0	0	0	0	0	0	0	0	0	0	0	369	0	0	0	0	0	0	0	0	0	0	0	0
3315	BC012292	HSPB1	HSPB1	618	0	0	*	464	1220	0	0	0	1642	0.428573	0	0	0	0	0	0	1806	0.565917	0	0	0	0	0	0	0	0	0	0	0	0	0	0	1347	0.142869	0	0	0	0	0	0	2008	0.718878	0	0	0
27129	BC006319	HSPB7	HSPB7	513	0	0	*	3212	5571	5272	0.714878	0	0	0	0	0	0	7945	1.30658	0	772	-2.85126	0	0	0	311	0	0	0	0	0	0	0	10187	1.66519	1	3613	-0.624739	0	1	0	0	0	0	623	-3.16063	0	0	0
56301	BC035627	SLC7A10	SLC7A10	1572	0	0	*	208	50	0	0	0	1880	5.23266	1	1	0	0	0	0	0	0	0	0	0	342	0	0	1088	4.44361	1	1	0	0	0	0	0	0	0	0	0	0	0	0	0	0	0	0	0
79663	BC017763	HSPBAP1	HSPBAP1	603	0	0	*	2050	3658	8229	2.00509	1	380	-3.26698	0	1	0	0	0	0	16501	2.17343	1	1	0	0	0	0	18	0	0	0	0	0	0	0	0	0	0	0	0	0	0	0	0	0	0	0	0
116224	BC013062	C9orf42	FAM122A	864	0	0	*	1423	1354	0	0	0	4895	1.85408	1	1	0	13260	3.22007	1	9261	2.77394	1	2	3.22007	3067	1.10789	0	6959	2.36165	1	1	0	3379	1.24766	0	0	0	0	0	0	0	0	0	1661	0.294824	0	0	0
81892	BC017895	C14orf156	SLIRP	330	0	0	*	1242	902	6951	2.48456	1	660	-0.450661	0	1	0	10027	3.01315	1	0	0	0	1	0	0	0	0	5354	2.56942	1	1	0	0	0	0	0	0	0	0	0	0	0	0	0	0	0	0	0
56006	BC008869	FLJ12886	SMG9	1563	0	0	*	5963	2540	4279	-0.478765	0	28	0	0	0	0	0	0	0	12117	2.25413	1	1	0	5357	-0.154613	0	13407	2.40009	1	1	0	0	0	0	3946	0.635562	0	0	0	3	0	0	277	0	0	0	0
113444	BC011880	LOC113444	SMIM12	279	0	0	*	2880	964	0	0	0	0	0	0	0	0	0	0	0	5958	2.62772	1	1	0	10	0	0	8676	3.16993	1	1	0	0	0	0	6494	2.752	1	1	0	0	0	0	0	0	0	0	0
3359	BC002354	HTR3A	HTR3A	1437	0	0	*	175	712	0	0	0	0	0	0	0	0	0	0	0	0	0	0	0	0	0	0	0	0	0	0	0	0	0	0	0	0	0	0	0	0	0	0	0	2963	2.05711	1	1	0
8773	BC000148	SNAP23	SNAP23	636	0	0	*	6228	2534	13883	1.15648	0	2114	-0.261441	0	0	0	29205	2.22937	1	4183	0.723121	0	1	0	12	0	0	8034	1.6647	1	1	0	0	0	0	21016	3.052	1	1	0	30	0	0	21224	3.06621	1	1	0
84329	BC007277	MGC15619	HVCN1	711	0	0	*	1341	2260	104	0	0	8867	1.97212	1	1	0	0	0	0	3025	0.420612	0	0	0	0	0	0	917	-1.30133	0	0	0	4705	1.81089	1	25	0	0	1	0	1065	-0.332456	0	0	0	0	0	0
3373	BC035695	HYAL1	HYAL1	1308	0	0	*	523	300	0	0	0	0	0	0	0	0	3562	2.7678	1	0	0	0	1	0	0	0	0	0	0	0	0	0	0	0	0	0	0	0	0	0	0	0	0	0	0	0	0	0
8372	BC005896	HYAL3	HYAL3	1254	0	0	*	846	771	1468	0.795122	0	0	0	0	0	0	0	0	0	0	0	0	0	0	0	0	0	0	0	0	0	0	0	0	0	0	0	0	0	0	0	0	0	0	0	0	0	0
81888	BC006140	HYI	HYI	654	0	0	*	1783	740	0	0	0	5586	2.91622	1	1	0	0	0	0	0	0	0	0	0	0	0	0	565	-0.389274	0	0	0	0	0	0	651	-0.184868	0	0	0	3	0	0	125	0	0	0	0
10525	BC004560	HYOU1	HYOU1	444	0	0	*	442	384	0	0	0	486	0.33985	0	0	0	5808	3.71592	1	0	0	0	1	0	429	0	0	0	0	0	0	0	0	0	0	0	0	0	0	0	11	0	0	0	0	0	0	0
130026	BC000993	ALS2CR15	ICA1L	564	0	0	*	6393	6551	1001	-2.67505	0	21895	1.74081	1	1	0	17534	1.45559	0	2578	-1.34546	0	0	0	1701	-1.91011	0	6127	-0.0965343	0	0	0	11469	0.843175	0	11809	0.8501	0	0	0	11	0	0	26970	2.04157	1	1	0
3384	BC003097	ICAM2	ICAM2	828	0	0	*	4802	2509	0	0	0	0	0	0	0	0	0	0	0	0	0	0	0	0	0	0	0	0	0	0	0	0	0	0	0	0	0	0	0	0	0	0	0	0	0	0	0	0
3386	BC000046	ICAM4	ICAM4	819	0	0	*	280	184	0	0	0	2415	3.71425	1	1	0	0	0	0	0	0	0	0	0	0	0	0	0	0	0	0	0	810	1.5325	1	0	0	0	1	0	0	0	0	886	2.2676	1	1	0
128439	BC040237	LOC128439	SNHG11	252	0	0	*	50	1052	0	0	0	0	0	0	0	0	0	0	0	23925	4.50731	1	1	0	0	0	0	9211	3.13022	1	1	0	824	4.04264	1	0	0	0	1	0	0	0	0	1343	0.352325	0	0	0
29851	BC028210	ICOS	ICOS	600	0	0	*	2560	1045	0	0	0	0	0	0	0	0	0	0	0	0	0	0	0	0	0	0	0	0	0	0	0	0	0	0	0	0	0	0	0	0	0	0	0	0	0	0	0	0
719	BC020742	C3AR1	C3AR1	1449	0	0	*	937	50	0	0	0	0	0	0	0	0	0	0	0	0	0	0	0	0	0	0	0	0	0	0	0	0	0	0	0	0	0	0	0	0	0	0	0	0	0	0	0	0
3397	BC012420	ID1	ID1	468	1	1	bHLH	3427	996	0	0	0	0	0	0	0	0	0	0	0	0	0	0	0	0	0	0	0	0	0	0	0	0	0	0	0	0	0	0	0	0	0	0	0	0	0	0	0	0
2762	BC000117	GMDS	GMDS	1119	0	0	*	1246	362	0	0	0	142	-1.3501	0	0	0	6794	2.44696	1	1698	2.22977	1	2	2.44696	0	0	0	4673	3.69029	1	1	0	0	0	0	0	0	0	0	0	0	0	0	2672	2.88386	1	1	0
10174	BC010146	SORBS3	SORBS3	990	1	0	NA	2849	1305	0	0	0	0	0	0	0	0	0	0	0	0	0	0	0	0	0	0	0	16432	3.65439	1	1	0	0	0	0	3392	1.37809	0	0	0	0	0	0	0	0	0	0	0
3418	BC009244	IDH2	IDH2	1359	0	0	*	532	531	0	0	0	461	-0.203945	0	0	0	0	0	0	0	0	0	0	0	0	0	0	0	0	0	0	0	381	0	0	481	0	0	0	0	0	0	0	0	0	0	0	0
3419	BC021967	IDH3A	IDH3A	1101	0	0	*	245	534	0	0	0	0	0	0	0	0	0	0	0	0	0	0	0	0	0	0	0	0	0	0	0	0	0	0	0	0	0	0	0	0	0	0	0	0	0	0	0	0
3420	BC001960	IDH3B	IDH3B	1158	0	0	*	50	1142	5	0	0	0	0	0	0	0	0	0	0	0	0	0	0	0	0	0	0	0	0	0	0	0	0	0	0	0	0	0	0	0	0	0	0	512	-1.15735	0	0	0
3421	BC000933	IDH3G	IDH3G	1182	0	0	*	1166	971	0	0	0	3174	1.70876	1	1	0	0	0	0	1389	0.516503	0	0	0	622	-0.906581	0	1155	0.25035	0	0	0	26	0	0	5801	2.57876	1	1	0	0	0	0	0	0	0	0	0
3422	BC019227	IDI1	IDI1	687	0	0	*	1660	362	0	0	0	0	0	0	0	0	0	0	0	3103	3.0996	1	1	0	0	0	0	0	0	0	0	0	0	0	0	8	0	0	0	0	0	0	0	0	0	0	0	0
91734	BC017778	IDI2	IDI2	684	0	0	*	104	437	0	0	0	0	0	0	0	0	0	0	0	0	0	0	0	0	0	0	0	0	0	0	0	0	0	0	0	0	0	0	0	0	0	0	0	0	0	0	0	0
388677	BC019835	NOTCH2NL	NOTCH2NLA	711	0	0	*	50	1982	0	0	0	0	0	0	0	0	0	0	0	0	0	0	0	0	0	0	0	0	0	0	0	0	0	0	0	0	0	0	0	0	5839	6.86765	1	0	0	0	1	6.86765
51124	BC010888	IER3IP1	IER3IP1	249	0	0	*	774	387	0	0	0	0	0	0	0	0	0	0	0	0	0	0	0	0	0	0	0	0	0	0	0	0	0	0	0	0	0	0	0	0	0	0	0	0	0	0	0	0
796	BC069760	CALCA	CALCA	426	0	0	*	60	50	0	0	0	0	0	0	0	0	0	0	0	0	0	0	0	0	0	0	0	0	0	0	0	0	0	0	0	0	0	0	0	0	0	0	0	2631	5.71754	1	1	0
3429	BC015492	IFI27	IFI27	360	0	0	*	1225	1707	2138	0.80348	0	0	0	0	0	0	0	0	0	5557	1.70284	1	1	0	170	0	0	0	0	0	0	0	5743	2.22902	1	0	0	0	1	0	0	0	0	0	0	0	0	0
79085	BC001656	SLC25A23	SLC25A23	1449	0	0	*	50	331	4845	6.59842	1	0	0	0	1	6.59842	0	0	0	355	0	0	0	0	0	0	0	0	0	0	0	0	0	0	0	442	0	0	0	0	0	0	0	5455	4.04268	1	1	0
83982	BC032626	FAM14A	IFI27L2	393	0	0	*	392	293	0	0	0	0	0	0	0	0	0	0	0	0	0	0	0	0	0	0	0	0	0	0	0	0	0	0	0	0	0	0	0	0	0	0	0	0	0	0	0	0
10437	BC031020	IFI30	IFI30	753	0	0	*	7800	6985	15914	1.02875	0	3870	-0.851927	0	0	0	3671	-1.0873	0	8243	0.238909	0	0	0	3812	-1.03293	0	12878	0.882577	0	0	0	0	0	0	0	0	0	0	0	22	0	0	14011	1.00423	0	0	0
10561	BC022870	IFI44	IFI44	1335	0	0	*	908	515	0	0	0	0	0	0	0	0	0	0	0	0	0	0	0	0	0	0	0	0	0	0	0	0	0	0	0	0	0	0	0	0	0	0	0	0	0	0	0	0
6667	BC062539	SP1	SP1	2358	1	1	C2H2 ZF	2406	2072	1663	-0.532848	0	7757	1.90447	1	1	0	0	0	0	386	0	0	0	0	0	0	0	8551	2.04507	1	1	0	0	0	0	525	-1.98063	0	0	0	0	0	0	10619	2.35755	1	1	0
3447	BC069427	IFNA13	IFNA13	570	0	0	*	50	284	0	0	0	0	0	0	0	0	0	0	0	0	0	0	0	0	0	0	0	0	0	0	0	0	0	0	0	0	0	0	0	0	0	0	0	0	0	0	0	0
3452	BC069329	IFNA21	IFNA21	570	0	0	*	1656	2865	0	0	0	0	0	0	0	0	0	0	0	6236	1.12209	0	0	0	0	0	0	0	0	0	0	0	0	0	0	4876	0.767163	0	0	0	0	0	0	0	0	0	0	0
1361	BC007057	CPB2	CPB2	1272	0	0	*	1458	50	0	0	0	0	0	0	0	0	0	0	0	0	0	0	0	0	1816	0.316773	0	0	0	0	0	0	0	0	0	5622	6.81301	1	1	0	0	0	0	0	0	0	0	0
3475	BC001272	IFRD1	IFRD1	1356	0	0	*	933	50	4079	2.12827	1	0	0	0	1	0	0	0	0	0	0	0	0	0	0	0	0	0	0	0	0	0	0	0	0	355	0	0	0	0	0	0	0	900	4.16993	1	1	0
90410	BC002640	IFT20	IFT20	447	0	0	*	2689	752	0	0	0	0	0	0	0	0	0	0	0	0	0	0	0	0	0	0	0	0	0	0	0	0	0	0	0	0	0	0	0	0	0	0	0	0	0	0	0	0
5887	BC020973	RAD23B	RAD23B	1230	0	0	*	50	967	0	0	0	0	0	0	0	0	0	0	0	0	0	0	0	0	0	0	0	0	0	0	0	0	0	0	0	0	0	0	0	0	0	0	0	0	0	0	0	0
112752	BC010436	MGC16028	IFT43	642	0	0	*	219	562	0	0	0	0	0	0	0	0	0	0	0	0	0	0	0	0	0	0	0	0	0	0	0	0	0	0	0	3303	2.55513	1	1	0	0	0	0	3627	2.69013	1	1	0
11092	BC012940	C9orf9	SPACA9	669	0	0	*	354	824	355	0	0	0	0	0	0	0	0	0	0	0	0	0	0	0	0	0	0	9147	3.47258	1	1	0	3177	3.16584	1	268	0	0	1	0	0	0	0	0	0	0	0	0
219938	BC058039	SPATA19	SPATA19	504	0	0	*	50	811	0	0	0	0	0	0	0	0	0	0	0	6113	2.91411	1	1	0	0	0	0	2821	1.79843	1	1	0	0	0	0	0	0	0	0	0	3094	5.9514	1	0	0	0	1	0
3481	BC000531	IGF2	IGF2	543	0	0	*	5070	2503	24	0	0	6501	1.377	0	0	0	329	0	0	10002	1.99856	1	1	0	990	-2.35649	0	4563	0.866324	0	0	0	0	0	0	0	0	0	0	0	0	0	0	0	0	0	0	0
10644	BC021290	IMP-2	IGF2BP2	1797	0	0	*	73	527	0	0	0	0	0	0	0	0	1863	4.67359	1	0	0	0	1	0	0	0	0	0	0	0	0	0	285	0	0	0	0	0	0	0	0	0	0	0	0	0	0	0
10643	BC051296	IMP-3	IGF2BP3	303	0	0	*	703	1489	0	0	0	0	0	0	0	0	0	0	0	0	0	0	0	0	0	0	0	0	0	0	0	0	9	0	0	0	0	0	0	0	0	0	0	0	0	0	0	0
3487	BC016041	IGFBP4	IGFBP4	777	0	0	*	247	50	0	0	0	0	0	0	0	0	712	1.52737	1	0	0	0	1	0	4	0	0	0	0	0	0	0	0	0	0	0	0	0	0	0	0	0	0	0	0	0	0	0
3500	BC014667	IGHG1	IGHG1	1440	0	0	*	12815	13610	18872	0.558414	0	15624	0.199097	0	0	0	8657	-0.565894	0	0	0	0	0	0	1602	-2.99989	0	10859	-0.325776	0	0	0	2127	-2.59094	0	3647	-1.89988	0	0	0	16344	0.350928	0	29517	1.11688	0	0	0
3501	BC062335	IGHG2	IGHG2	1398	0	0	*	1724	1994	0	0	0	0	0	0	0	0	0	0	0	0	0	0	0	0	0	0	0	0	0	0	0	0	0	0	0	0	0	0	0	0	64	0	0	0	0	0	0	0
3507	BC011857	IGHM	IGHM	1863	1	0	Unknown	6679	6644	24	0	0	15425	1.21515	0	0	0	5096	-0.390267	0	20421	1.61993	1	1	0	0	0	0	10005	0.590597	0	0	0	296	0	0	1369	-2.27893	0	0	0	0	0	0	10439	0.65186	0	0	0
50802	BC032451	IGK	IGK	711	0	0	*	5418	9753	139	0	0	14988	0.61989	0	0	0	8657	0.676107	0	4662	-1.0649	0	0	0	0	0	0	11203	0.199967	0	0	0	16352	1.59363	1	17295	0.826437	0	1	0	518	-3.38674	0	15479	0.666394	0	0	0
3514	BC056256	IGKC	IGKC	705	0	0	*	4026	4919	7722	0.939627	0	7	0	0	0	0	0	0	0	12009	1.28768	0	0	0	3482	-0.209431	0	9	0	0	0	0	0	0	0	23255	2.2411	1	1	0	0	0	0	28	0	0	0	0
28299	BC034146	IGKV1-5	IGKV1-5	711	0	0	*	6014	5536	12393	1.04313	0	9037	0.707	0	0	0	0	0	0	6329	0.193134	0	0	0	240	0	0	4413	-0.327084	0	0	0	9137	0.603396	0	1917	-1.52999	0	0	0	0	0	0	388	0	0	0	0
3537	BC030983	IGLC1	IGLC1	711	0	0	*	4158	3177	0	0	0	2039	-0.639803	0	0	0	0	0	0	3581	0.172697	0	0	0	609	-2.77138	0	5688	0.840256	0	0	0	3810	-0.126099	0	0	0	0	0	0	688	-2.59541	0	4998	0.653686	0	0	0
57822	BC036890	GRHL3	GRHL3	1668	1	1	Grainyhead	50	477	11849	7.88862	1	0	0	0	1	7.88862	2192	5.45418	1	8181	4.10022	1	2	5.45418	23833	8.89682	1	8869	4.21671	1	2	8.89682	10815	7.75689	1	0	0	0	1	7.75689	15136	8.24184	1	0	0	0	1	8.24184
3543	BC012293	IGLL1	IGLL1	642	0	0	*	1181	556	0	0	0	4288	2.94715	1	1	0	0	0	0	602	0.114679	0	0	0	0	0	0	3	0	0	0	0	3291	1.47852	0	1498	1.42988	0	0	0	0	0	0	1011	0.862626	0	0	0
28815	BC018749	IGLV2-14	IGLV2-14	702	0	0	*	4924	6148	4033	-0.287977	0	4912	-0.323807	0	0	0	8877	0.850241	0	664	-3.21086	0	0	0	7222	0.552568	0	4040	-0.605762	0	0	0	0	0	0	0	0	0	0	0	0	0	0	12737	1.05084	0	0	0
28793	BC022823	IGLV3-25	IGLV3-25	702	0	0	*	2807	3342	7413	1.40103	0	0	0	0	0	0	0	0	0	12240	1.87282	1	1	0	1	0	0	516	-2.69527	0	0	0	1892	-0.569117	0	6064	0.859558	0	0	0	0	0	0	0	0	0	0	0
28778	BC023973	IGLV6-57	IGLV6-57	447	0	0	*	5575	7100	328	0	0	6877	-0.0460397	0	0	0	6411	0.201578	0	14108	0.990623	0	0	0	6043	0.116293	0	0	0	0	0	0	2396	-1.21834	0	14578	1.0379	0	0	0	2307	-1.27295	0	12239	0.785595	0	0	0
10261	BC017844	IGSF6	IGSF6	726	0	0	*	484	3255	0	0	0	0	0	0	0	0	7945	4.03697	1	0	0	0	1	0	0	0	0	0	0	0	0	0	0	0	0	5639	0.792782	0	0	0	0	0	0	0	0	0	0	0
1543	BC023019	CYP1A1	CYP1A1	1539	0	0	*	377	50	825	1.12983	0	0	0	0	0	0	0	0	0	0	0	0	0	0	0	0	0	0	0	0	0	0	0	0	0	296	0	0	0	0	0	0	0	0	0	0	0	0
22806	BC032707	ZNFN1A3	IKZF3	1530	1	1	C2H2 ZF	1768	727	16405	3.21395	1	0	0	0	1	0	11726	2.72952	1	0	0	0	1	0	3301	0.900785	0	0	0	0	0	0	0	0	0	0	0	0	0	0	560	-1.65862	0	0	0	0	0	0
3587	BC028082	IL10RA	IL10RA	1737	0	0	*	55	1217	0	0	0	0	0	0	0	0	0	0	0	0	0	0	0	0	0	0	0	2161	0.82837	0	0	0	0	0	0	2873	1.23923	0	0	0	0	0	0	0	0	0	0	0
3589	BC012506	IL11	IL11	600	0	0	*	5423	2590	0	0	0	0	0	0	0	0	0	0	0	10913	2.07502	1	1	0	0	0	0	1656	-0.645249	0	0	0	4259	-0.348576	0	0	0	0	0	0	0	0	0	0	0	0	0	0
30815	BC006564	ST6GALNAC6	ST6GALNAC6	1002	0	0	*	1733	50	0	0	0	0	0	0	0	0	0	0	0	0	0	0	0	0	0	0	0	2674	5.74093	1	1	0	0	0	0	0	0	0	0	0	0	0	0	0	0	0	0	0
113278	BC009750	C20orf54	SLC52A3	1410	0	0	*	50	1245	4391	6.45648	1	0	0	0	1	6.45648	0	0	0	0	0	0	0	0	0	0	0	0	0	0	0	0	6	0	0	0	0	0	0	0	0	0	0	0	0	0	0	0
3605	BC067505	IL17	IL17A	468	0	0	*	2510	3152	107	0	0	0	0	0	0	0	0	0	0	0	0	0	0	0	368	0	0	5183	0.71752	0	0	0	0	0	0	0	0	0	0	0	0	0	0	0	0	0	0	0
84818	BC006411	IL17RC	IL17RC	1617	0	0	*	161	81	521	1.69422	1	0	0	0	1	0	0	0	0	0	0	0	0	0	173	0	0	0	0	0	0	0	97	0	0	28	0	0	0	0	0	0	0	97	0	0	0	0
3606	BC007007	IL18	IL18	582	0	0	*	50	284	0	0	0	0	0	0	0	0	0	0	0	0	0	0	0	0	0	0	0	0	0	0	0	0	0	0	0	0	0	0	0	0	116	0	0	0	0	0	0	0
6770	BC010550	STAR	STAR	858	0	0	*	1568	2403	0	0	0	422	-2.50952	0	0	0	0	0	0	154	0	0	0	0	0	0	0	7185	1.58015	1	1	0	3813	1.282	0	0	0	0	0	0	0	0	0	0	0	0	0	0
59067	BC066259	IL21	IL21	489	0	0	*	1405	740	0	0	0	0	0	0	0	0	0	0	0	0	0	0	0	0	0	0	0	0	0	0	0	0	0	0	0	0	0	0	0	0	0	0	0	0	0	0	0	0
50616	BC069308	IL22	IL22	540	0	0	*	184	278	0	0	0	628	1.17568	0	0	0	0	0	0	0	0	0	0	0	167	0	0	0	0	0	0	0	0	0	0	0	0	0	0	0	0	0	0	0	0	0	0	0
58985	BC029273	IL22RA1	IL22RA1	1725	0	0	*	572	1208	1903	1.73419	1	0	0	0	1	0	0	0	0	0	0	0	0	0	0	0	0	1886	0.642709	0	0	0	0	0	0	0	0	0	0	0	0	0	0	4500	1.8973	1	1	0
11009	BC009681	IL24	IL24	624	0	0	*	3617	2369	0	0	0	0	0	0	0	0	55	0	0	0	0	0	0	0	0	0	0	0	0	0	0	0	0	0	0	12435	2.39206	1	1	0	0	0	0	11962	2.33611	1	1	0
115584	BC057780	SLC5A11	SLC5A11	1836	0	0	*	50	240	13568	8.08406	1	0	0	0	1	8.08406	55	0	0	154	0	0	0	0	394	0	0	0	0	0	0	0	0	0	0	0	0	0	0	0	2224	5.47508	1	0	0	0	1	0
3562	BC069472	IL3	IL3	459	0	0	*	310	761	1236	1.99534	1	1671	1.13474	0	1	0	0	0	0	540	-0.494937	0	0	0	0	0	0	1360	0.837638	0	0	0	716	1.20769	0	260	0	0	0	0	0	0	0	0	0	0	0	0
8428	BC035578	STK24	STK24	1296	0	0	*	212	568	0	0	0	0	0	0	0	0	0	0	0	1945	1.77581	1	1	0	273	0	0	8319	3.87245	1	1	0	0	0	0	338	0	0	0	0	0	0	0	0	0	0	0	0
81572	BC009334	PDRG1	PDRG1	402	0	0	*	50	337	0	0	0	0	0	0	0	0	0	0	0	0	0	0	0	0	0	0	0	0	0	0	0	0	0	0	0	0	0	0	0	0	14343	8.1642	1	0	0	0	1	8.1642
27178	BC020637	IL1F7	IL37	657	0	0	*	646	371	0	0	0	0	0	0	0	0	0	0	0	1080	1.54154	1	1	0	0	0	0	0	0	0	0	0	226	0	0	0	0	0	0	0	0	0	0	0	0	0	0	0
3569	BC015511	IL6	IL6	639	1	0	Unknown	3342	2331	5763	0.786108	0	24956	3.42037	1	1	0	0	0	0	0	0	0	0	0	541	-2.62701	0	55	0	0	0	0	0	0	0	3406	0.547129	0	0	0	8	0	0	0	0	0	0	0
3574	BC047698	IL7	IL7	534	0	0	*	1637	605	0	0	0	0	0	0	0	0	0	0	0	0	0	0	0	0	0	0	0	0	0	0	0	0	0	0	0	0	0	0	0	0	0	0	0	0	0	0	0	0
8682	BC022554	PEA15	PEA15	393	0	0	*	50	2397	0	0	0	0	0	0	0	0	0	0	0	3396	0.502607	0	0	0	0	0	0	0	0	0	0	0	0	0	0	0	0	0	0	0	8775	7.45533	1	0	0	0	1	7.45533
202374	BC021666	STK32A	STK32A	501	0	0	*	1098	815	0	0	0	2245	1.46184	0	0	0	0	0	0	108	0	0	0	0	1024	-0.100662	0	2683	1.71898	1	1	0	575	-0.933244	0	13259	4.02403	1	1	0	0	0	0	3600	2.14312	1	1	0
27125	BC063007	AFF4	AFF4	1062	1	0	Unknown	50	749	0	0	0	0	0	0	0	0	55	0	0	0	0	0	0	0	2972	5.89336	1	0	0	0	1	0	6295	6.97613	1	0	0	0	1	6.97613	6211	6.95675	1	0	0	0	1	6.95675
23341	BC047363	DNAJC16	DNAJC16	2349	0	0	*	1271	50	0	0	0	0	0	0	0	0	0	0	0	0	0	0	0	0	0	0	0	0	0	0	0	0	0	0	0	0	0	0	0	0	0	0	0	0	0	0	0	0
64771	BC002328	C6orf106	ILRUN	897	0	0	*	50	1223	0	0	0	3487	1.51156	1	1	0	0	0	0	0	0	0	0	0	0	0	0	0	0	0	0	0	0	0	0	0	0	0	0	0	0	0	0	2243	0.875005	0	0	0
92856	BC010042	IMP4	IMP4	876	0	0	*	191	253	0	0	0	0	0	0	0	0	0	0	0	0	0	0	0	0	0	0	0	0	0	0	0	0	0	0	0	0	0	0	0	0	0	0	0	0	0	0	0	0
3612	BC008381	IMPA1	IMPA1	834	0	0	*	2194	565	0	0	0	0	0	0	0	0	0	0	0	0	0	0	0	0	0	0	0	0	0	0	0	0	0	0	0	0	0	0	0	0	0	0	0	0	0	0	0	0
55364	BC034016	IMPACT	IMPACT	963	0	0	*	1406	1660	0	0	0	0	0	0	0	0	0	0	0	4415	1.41123	0	0	0	0	0	0	0	0	0	0	0	0	0	0	0	0	0	0	0	0	0	0	7172	2.11119	1	1	0
3615	BC012840	IMPDH2	IMPDH2	1545	0	0	*	1836	172	0	0	0	0	0	0	0	0	0	0	0	0	0	0	0	0	0	0	0	0	0	0	0	0	0	0	0	0	0	0	0	0	0	0	0	125	0	0	0	0
54556	BC010851	ING3	ING3	282	1	0	NA	2441	6042	5291	1.11607	0	9591	0.666655	0	0	0	3836	0.65213	0	293	0	0	0	0	0	0	0	1504	-2.00622	0	0	0	1502	-0.700587	0	6296	0.0594094	0	0	0	0	0	0	3641	-0.730691	0	0	0
51147	BC007781	ING4	ING4	750	1	0	Unknown	157	1386	0	0	0	1465	0.0799734	0	0	0	0	0	0	0	0	0	0	0	0	0	0	0	0	0	0	0	0	0	0	0	0	0	0	0	0	0	0	0	0	0	0	0
84289	BC071899	ING5	ING5	723	1	0	NA	1245	921	0	0	0	0	0	0	0	0	1534	0.301153	0	0	0	0	0	0	0	0	0	257	0	0	0	0	0	0	0	598	-0.623056	0	0	0	0	0	0	0	0	0	0	0
389119	BC012170	LOC389119	INKA1	858	0	0	*	1683	758	0	0	0	0	0	0	0	0	0	0	0	3149	2.05462	1	1	0	775	-1.11877	0	0	0	0	0	0	0	0	0	0	0	0	0	0	0	0	0	0	0	0	0	0
6663	BC002824	SOX10	SOX10	1401	1	1	HMG/Sox	50	50	4241	6.40633	1	0	0	0	1	6.40633	0	0	0	1173	4.55213	1	1	0	5043	6.65621	1	0	0	0	1	6.65621	0	0	0	0	0	0	0	0	10744	7.74739	1	0	0	0	1	7.74739
125476	BC048989	C18orf37	INO80C	414	0	0	*	1081	1670	0	0	0	8473	2.34302	1	1	0	0	0	0	0	0	0	0	0	0	0	0	0	0	0	0	0	0	0	0	0	0	0	0	0	0	0	0	0	0	0	0	0
283899	BC047712	FLJ90652	INO80E	735	0	0	*	1282	3577	0	0	0	649	-2.46246	0	0	0	0	0	0	9863	1.46328	0	0	0	0	0	0	0	0	0	0	0	0	0	0	14226	1.99171	1	1	0	0	0	0	10550	1.56042	1	1	0
80778	BC028136	ZNF34	ZNF34	1650	1	1	C2H2 ZF	50	512	6112	6.93357	1	0	0	0	1	6.93357	4274	6.41752	1	0	0	0	1	6.41752	10831	7.75902	1	0	0	0	1	7.75902	0	0	0	0	0	0	0	0	17168	8.42358	1	0	0	0	1	8.42358
3630	BC005255	INS	INS	333	1	0	Unknown	2043	493	0	0	0	0	0	0	0	0	0	0	0	0	0	0	0	0	0	0	0	0	0	0	0	0	0	0	0	0	0	0	0	0	0	0	0	0	0	0	0	0
3638	BC001880	INSIG1	INSIG1	834	0	0	*	1804	618	0	0	0	0	0	0	0	0	0	0	0	46	0	0	0	0	0	0	0	0	0	0	0	0	0	0	0	0	0	0	0	0	0	0	0	0	0	0	0	0
3641	BC026254	INSL4	INSL4	420	0	0	*	2243	375	2776	0.307578	0	0	0	0	0	0	0	0	0	3828	3.35163	1	1	0	0	0	0	0	0	0	0	0	0	0	0	2090	2.47854	1	1	0	0	0	0	0	0	0	0	0
54973	BC007978	CPSF3L	INTS11	1803	0	0	*	3553	4413	31538	3.14998	1	7750	0.812437	0	1	0	5205	0.55086	0	340	0	0	0	0	767	-2.21174	0	0	0	0	0	0	91	0	0	7805	0.822639	0	0	0	341	0	0	11408	1.37021	0	0	0
65123	BC025254	C1orf60	INTS3	1338	0	0	*	1579	1798	0	0	0	0	0	0	0	0	0	0	0	0	0	0	0	0	0	0	0	272	0	0	0	0	0	0	0	0	0	0	0	0	0	0	0	5247	1.5451	1	1	0
27130	BC006370	INVS	INVS	306	0	0	*	2819	3243	0	0	0	0	0	0	0	0	1479	-0.930561	0	0	0	0	0	0	0	0	0	156	0	0	0	0	0	0	0	0	0	0	0	0	0	0	0	9539	1.55651	1	1	0
51447	BC001864	IHPK2	IP6K2	213	0	0	*	1804	1947	0	0	0	0	0	0	0	0	110	0	0	5372	1.46421	0	0	0	0	0	0	0	0	0	0	0	0	0	0	486	0	0	0	0	0	0	0	0	0	0	0	0
8677	BC017237	STX10	STX10	603	0	0	*	1225	1473	6313	2.36554	1	0	0	0	1	0	0	0	0	0	0	0	0	0	1459	0.252198	0	6665	2.17785	1	1	0	1786	0.54395	0	0	0	0	0	0	0	0	0	5192	1.81753	1	1	0
389123	BC040047	IQCF2	IQCF2	495	0	0	*	401	1779	0	0	0	3756	1.07813	0	0	0	0	0	0	648	-1.457	0	0	0	66	0	0	1039	-0.775871	0	0	0	1326	1.72541	1	321	0	0	1	0	0	0	0	0	0	0	0	0
64799	BC048964	FLJ12476	IQCH	3084	0	0	*	421	1386	0	0	0	3809	1.45849	0	0	0	0	0	0	0	0	0	0	0	0	0	0	0	0	0	0	0	0	0	0	0	0	0	0	0	0	0	0	0	0	0	0	0
5562	BC048980	PRKAA1	PRKAA1	1725	0	0	*	50	228	0	0	0	0	0	0	0	0	4658	6.54164	1	0	0	0	1	6.54164	0	0	0	0	0	0	0	0	0	0	0	0	0	0	0	0	0	0	0	3087	3.7591	1	1	0
11213	BC057800	IRAK3	IRAK3	1791	1	0	Unknown	680	362	0	0	0	0	0	0	0	0	0	0	0	3411	3.23613	1	1	0	0	0	0	0	0	0	0	0	0	0	0	0	0	0	0	0	0	0	0	0	0	0	0	0
118932	BC021671	ANKRD22	ANKRD22	576	1	0	NA	50	178	763	3.93168	1	0	0	0	1	0	0	0	0	0	0	0	0	0	9980	7.64097	1	0	0	0	1	7.64097	3658	6.19298	1	0	0	0	1	6.19298	3843	6.26416	1	0	0	0	1	6.26416
80011	BC063409	NIP30	FAM192A	246	0	0	*	1652	50	0	0	0	0	0	0	0	0	0	0	0	0	0	0	0	0	0	0	0	0	0	0	0	0	0	0	0	0	0	0	0	0	0	0	0	0	0	0	0	0
3662	BC015752	IRF4	IRF4	1356	1	1	IRF	448	2653	0	0	0	0	0	0	0	0	0	0	0	0	0	0	0	0	0	0	0	0	0	0	0	0	5198	3.53639	1	0	0	0	1	0	164	0	0	0	0	0	0	0
23373	BC028050	MECT1	CRTC1	1905	1	0	Unknown	50	509	0	0	0	0	0	0	0	0	0	0	0	0	0	0	0	0	6943	7.11749	1	0	0	0	1	7.11749	3925	6.29462	1	0	0	0	1	6.29462	3	0	0	0	0	0	0	0
23353	BC013613	UNC84A	SUN1	774	0	0	*	3645	247	8011	1.13606	0	0	0	0	0	0	55	0	0	8536	5.11098	1	1	0	0	0	0	7619	4.94702	1	1	0	0	0	0	0	0	0	0	0	0	0	0	0	0	0	0	0
5515	BC002657	PPP2CA	PPP2CA	930	1	1	NA	50	228	0	0	0	0	0	0	0	0	0	0	0	0	0	0	0	0	0	0	0	0	0	0	0	0	0	0	0	0	0	0	0	0	11564	7.8535	1	0	0	0	1	7.8535
6835	BC014411	SURF2	SURF2	771	0	0	*	2366	506	0	0	0	688	0.443271	0	0	0	5534	1.22587	0	880	0.798366	0	0	0	0	0	0	3716	2.87654	1	1	0	830	-1.51127	0	3700	2.87032	1	1	0	2304	-0.0383094	0	0	0	0	0	0
3669	BC016341	ISG20	ISG20	264	0	0	*	1544	206	0	0	0	0	0	0	0	0	0	0	0	4615	4.48561	1	1	0	0	0	0	0	0	0	0	0	0	0	0	0	0	0	0	0	0	0	0	0	0	0	0	0
3671	BC022478	ISLR	ISLR	1287	0	0	*	940	487	6067	2.69025	1	0	0	0	1	0	0	0	0	0	0	0	0	0	557	-0.754983	0	0	0	0	0	0	0	0	0	0	0	0	0	0	0	0	0	0	0	0	0	0
51015	BC008367	ISOC1	ISOC1	708	0	0	*	438	749	0	0	0	0	0	0	0	0	5589	3.67359	1	0	0	0	1	0	0	0	0	0	0	0	0	0	0	0	0	4711	2.653	1	1	0	0	0	0	0	0	0	0	0
5890	BC030219	RAD51L1	RAD51B	1155	1	1	NA	50	1745	259	0	0	0	0	0	0	0	0	0	0	0	0	0	0	0	0	0	0	0	0	0	0	0	0	0	0	0	0	0	0	0	0	0	0	0	0	0	0	0
9798	BC000116	KIAA0174	IST1	1008	0	0	*	390	415	0	0	0	0	0	0	0	0	0	0	0	0	0	0	0	0	0	0	0	0	0	0	0	0	0	0	0	0	0	0	0	0	0	0	0	0	0	0	0	0
51477	BC018952	ISYNA1	ISYNA1	1677	0	0	*	943	1417	1997	1.0825	0	6799	2.26248	1	1	0	0	0	0	3597	1.34395	0	0	0	0	0	0	0	0	0	0	0	0	0	0	0	0	0	0	0	0	0	0	3254	1.19937	0	0	0
23464	BC014457	GCAT	GCAT	1260	0	0	*	50	50	0	0	0	0	0	0	0	0	0	0	0	0	0	0	0	0	0	0	0	92	0	0	0	0	70	0	0	0	0	0	0	0	0	0	0	2063	5.36667	1	1	0
9270	BC012264	ITGB1BP1	ITGB1BP1	603	0	0	*	4082	1049	6259	0.616656	0	0	0	0	0	0	0	0	0	0	0	0	0	0	807	-2.33864	0	0	0	0	0	0	0	0	0	592	-0.825346	0	0	0	0	0	0	0	0	0	0	0
23421	BC009929	ITGB3BP	ITGB3BP	534	1	0	Unknown	1565	2603	3	0	0	0	0	0	0	0	1863	0.251465	0	1929	-0.432322	0	0	0	0	0	0	938	-1.47252	0	0	0	0	0	0	14	0	0	0	0	0	0	0	10425	2.0018	1	1	0
55600	BC020664	ITLN1	ITLN1	942	0	0	*	1487	2952	0	0	0	0	0	0	0	0	1973	0.407986	0	0	0	0	0	0	733	-1.02052	0	0	0	0	0	0	0	0	0	4043	0.453733	0	0	0	0	0	0	4597	0.639	0	0	0
9452	BC040437	ITM2A	ITM2A	792	0	0	*	2064	5415	1812	-0.18786	0	0	0	0	0	0	0	0	0	3720	-0.541659	0	0	0	0	0	0	0	0	0	0	0	0	0	0	6407	0.242688	0	0	0	0	0	0	0	0	0	0	0
132204	BC022518	SYNPR	SYNPR	798	0	0	*	969	1823	51	0	0	0	0	0	0	0	0	0	0	0	0	0	0	0	0	0	0	5635	1.6281	1	1	0	0	0	0	0	0	0	0	0	0	0	0	0	0	0	0	0
81618	BC050668	ITM2C	ITM2C	663	0	0	*	887	6797	2947	1.73224	1	8711	0.35794	0	1	0	1096	0.305242	0	0	0	0	0	0	0	0	0	11723	0.786372	0	0	0	0	0	0	0	0	0	0	0	7788	3.13425	1	0	0	0	1	0
23208	BC039205	SYT11	SYT11	1296	0	0	*	6301	2194	0	0	0	9123	2.05594	1	1	0	0	0	0	13661	2.63843	1	1	0	0	0	0	10861	2.30752	1	1	0	103	0	0	15293	2.80124	1	1	0	0	0	0	0	0	0	0	0
3705	BC018192	ITPK1	ITPK1	1245	0	0	*	4537	2353	5192	0.194552	0	10321	2.13301	1	1	0	5370	0.243183	0	1806	-0.381703	0	0	0	0	0	0	0	0	0	0	0	0	0	0	0	0	0	0	0	0	0	0	651	-1.85377	0	0	0
127540	BC021180	HMGB4	HMGB4	561	1	0	HMG/Sox	985	56	0	0	0	0	0	0	0	0	0	0	0	0	0	0	0	0	0	0	0	0	0	0	0	0	0	0	0	0	0	0	0	0	0	0	0	0	0	0	0	0
84958	BC035725	SYTL1	SYTL1	1689	0	0	*	1963	446	5539	1.49657	0	1972	2.14454	1	1	0	0	0	0	2084	2.22424	1	1	0	1	0	0	2940	2.7207	1	1	0	0	0	0	0	0	0	0	0	0	0	0	0	0	0	0	0
113177	BC014609	C19orf36	IZUMO4	645	0	0	*	2011	2222	0	0	0	0	0	0	0	0	0	0	0	0	0	0	0	0	0	0	0	0	0	0	0	0	0	0	0	0	0	0	0	0	0	0	0	0	0	0	0	0
51493	BC010308	HSPC117	RTCB	1518	0	0	*	50	1613	0	0	0	0	0	0	0	0	0	0	0	2346	0.540457	0	0	0	0	0	0	0	0	0	0	0	0	0	0	134	0	0	0	0	0	0	0	0	0	0	0	0
284348	BC057816	LYPD5	LYPD5	750	0	0	*	50	1021	438	0	0	0	0	0	0	0	4658	6.54164	1	3118	1.61064	1	2	6.54164	1	0	0	3377	1.72576	1	1	0	0	0	0	11974	3.55185	1	1	0	0	0	0	4250	2.05748	1	1	0
51528	BC005198	C14orf100	JKAMP	918	0	0	*	1203	799	0	0	0	0	0	0	0	0	0	0	0	0	0	0	0	0	1345	0.16097	0	0	0	0	0	0	0	0	0	0	0	0	0	0	0	0	0	0	0	0	0	0
84078	BC022033	KBTBD7	KBTBD7	2055	1	0	NA	50	209	5630	6.81506	1	0	0	0	1	6.81506	13425	8.06878	1	0	0	0	1	8.06878	8890	7.47411	1	0	0	0	1	7.47411	6092	6.92884	1	0	0	0	1	6.92884	16591	8.37426	1	0	0	0	1	8.37426
8681	BC025290	PLA2G4B	JMJD7-PLA2G4B	951	0	0	*	2003	1052	0	0	0	0	0	0	0	0	0	0	0	0	0	0	0	0	0	0	0	0	0	0	0	0	0	0	0	0	0	0	0	0	0	0	0	789	-0.415037	0	0	0
9929	BC015026	KIAA0063	JOSD1	609	0	0	*	6198	4834	19	0	0	0	0	0	0	0	0	0	0	185	0	0	0	0	1034	-2.58357	0	0	0	0	0	0	147	0	0	0	0	0	0	0	7439	0.263306	0	0	0	0	0	0
[truncated: 3,006 more rows]
[truncated: 34 more columns]
