# Supplementary material for: A Live Cell Protein Complementation Assay for ORFeome-Wide Probing of Human HOX Interactomes
Source: Cells. 2023 Jan 3;12(1):200. doi: 10.3390/cells12010200 (PMC9818449; doi:10.3390/cells12010200)
Supplement: Supplementary file 1 [file cells-12-00200-s001.zip › Table S4.xlsx]

## Sheet: Feuil1
Supplementary Table S4. List of the 1328 ORFs absent in the HEK cell lines 1 and 2.
ENTREZ_ID	id	Symbol	Official_sym	ORF_size
10351	BC047765	ABCA8	ABCA8
10058	BC000559	ABCB6	ABCB6
7920	BC031839	BAT5	ABHD16A
51225	BC007780	ABI3	ABI3
25890	BC030221	ABI3BP	ABI3BP
22885	BC001665	ABLIM3	ABLIM3
28	BC069595	ABO	ABO
33	BC039063	ACADL	ACADL
9744	BC018543	CENTB1	ACAP1
65057	BC016904	ACD	ACD
47	BC006195	ACLY	ACLY
2182	BC034959	ACSL4	ACSL4
58	BC012597	ACTA1	ACTA1
72	BC012617	ACTG2	ACTG2
10881	BC014610	ACTL7A	ACTL7A
81569	BC028909	ACTL8	ACTL8
87	BC003576	ACTN1	ACTN1
81	BC005033	ACTN4	ACTN4
10121	BC000693	ACTR1A	ACTR1A
90	BC033867	ACVR1	ACVR1
91	BC000254	ACVR1B	ACVR1B
94	BC042637	ACVRL1	ACVRL1
53616	BC036029	ADAM22	ADAM22
27299	BC069582	ADAMDEC1	ADAMDEC1
120	BC062559	ADD3	ADD3
9289	BC008770	GPR56	ADGRG1
64123	BC025721	ELTD1	ADGRL4
127	BC022319	ADH4	ADH4
59271	BC038710	C21orf63	AEVAC1
84632	BC033212	KIAA1914	AFAP1L2
174	BC027881	AFP	AFP
340351	BC030651	AGBL3	AGBL3
10768	BC007576	AHCYL1	AHCYL1
113146	BC049216	C14orf78	AHNAK2
158067	BC034776	C9orf98	AK8
8227	BC028151	DXYS155E	AKAP17A
8644	BC001479	AKR1C3	AKR1C3
84335	BC015562	AKT1S1	AKT1S1
64400	BC001134	FTS	AKTIP
212	BC030230	ALAS2	ALAS2
224	BC002430	ALDH3A2	ALDH3A2
8659	BC007581	ALDH4A1	ALDH4A1
250	BC009647	ALPP	ALPP
57679	BC029174	ALS2	ALS2
273	BC034376	AMPH	AMPH
51321	BC050709	AMZ2	AMZ2
201283	BC073870	FLJ32065	AMZ2P1
51433	BC001081	ANAPC5	ANAPC5
284	BC029406	ANGPT1	ANGPT1
124149	BC070117	FLJ43980	ANKRD26P1
57182	BC024725	KIAA1223	ANKRD50
307	BC063672	ANXA4	ANXA4
1174	BC003561	AP1S1	AP1S1
161	BC006155	AP2A2	AP2A2
8546	BC038444	AP3B1	AP3B1
327	BC000362	APEH	APEH
333	BC012889	APLP1	APLP1
80832	BC006276	APOL4	APOL4
55198	BC033731	DIP13B	APPL2
282679	BC040443	AQP11	AQP11
364	BC062701	AQP7	AQP7
23237	BC012321	ARC	ARC
9870	BC032944	KIAA0317	AREL1
377	BC028402	ARF3	ARF3
26286	BC005122	ARFGAP3	ARFGAP3
23092	BC068555	ARHGAP26	ARHGAP26
9743	BC000277	RICS	ARHGAP32
23370	BC008016	ARHGEF18	ARHGEF18
9181	BC020567	ARHGEF2	ARHGEF2
7984	BC010046	ARHGEF5	ARHGEF5
8874	BC033905	ARHGEF7	ARHGEF7
10620	BC060824	ARID3B	ARID3B
84100	BC024239	ARL6	ARL6
79798	BC014945	ARMC5	ARMC5
51309	BC002691	ARMCX1	ARMCX1
158947	BC032236	ARMCX4	ARMCX4
64860	BC064983	ARMCX5	ARMCX5
10095	BC007555	ARPC1B	ARPC1B
10093	BC065423	ARPC4	ARPC4
92714	BC032346	ARRDC1	ARRDC1
57561	BC015928	ARRDC3	ARRDC3
22901	BC012375	KIAA1001	ARSG
8853	BC063308	DDEF2	ASAP2
440	BC008723	ASNS	ASNS
55210	BC007803	ATAD3A	ATAD3A
83734	BC029268	ATG10	ATG10
9140	BC012266	ATG12	ATG12
51062	BC010708	SPG3A	ATL1
479	BC031609	ATP12A	ATP12A
477	BC052271	ATP1A2	ATP1A2
480	BC028297	ATP1A4	ATP1A4
498	BC011384	ATP5A1	ATP5F1A
516	BC004963	ATP5G1	ATP5MC1
23545	BC068531	ATP6V0A2	ATP6V0A2
26033	BC047716	ATRNL1	ATRNL1
57485	BC003517	ATXN7L1	ATXN7L1
222255	BC030616	ATXN7L4	ATXN7L4
558	BC032229	AXL	AXL
113451	BC010449	ADC	AZIN2
	BC080530	C21orf88	B3GALT5-AS1
10678	BC030579	B3GNT1	B3GNT2
10331	BC066876	B3GNT3	B3GNT3
11041	BC021965	B3GNT6	B3GNT6
2583	BC029828	GALGT	B4GALNT1
8704	BC002431	B4GALT2	B4GALT2
8703	BC000276	B4GALT3	B4GALT3
570	BC009567	BAAT	BAAT
9577	BC001251	BRE	BABAM2
9531	BC014656	BAG3	BAG3
7917	BC003133	BAT3	BAG6
55971	BC013888	BAIAP2L1	BAIAP2L1
55024	BC032241	BANK1	BANK1
8314	BC001596	BAP1	BAP1
4059	BC050450	LU	BCAM
63827	BC009117	BCAN	BCAN
8412	BC039895	BCAR3	BCAR3
586	BC033864	BCAT1	BCAT1
56647	BC009771	BCCIP	BCCIP
627	BC029795	BDNF	BDNF
10282	BC000899	BET1	BET1
8553	BC082238	BHLHB2	BHLHE40
330	BC037420	BIRC3	BIRC3
112401	BC071665	BIRC8	BIRC8
658	BC047773	BMPR1B	BMPR1B
659	BC052985	BMPR2	BMPR2
91272	BC003114	FAM44B	BOD1
140683	BC065726	C20orf70	BPIFA2
53339	BC028097	BTBD1	BTBD1
685	BC011618	BTC	BTC
8945	BC027994	BTRC	BTRC
699	BC028201	BUB1	BUB1
143379	BC021737	C10orf82	C10orf82
91894	BC008501	MGC14839	C11orf52
28970	BC012298	PTD012	C11orf54
60686	BC014299	C14orf93	C14orf93
84419	BC021173	NMES1	C15orf48
404550	BC009078	MGC17624	C16orf74
55028	BC005005	HLC-8	C17orf80
83608	BC025950	C18orf21	C18orf21
84167	BC027869	FLJ21742	C19orf44
79098	BC000765	C1orf116	C1orf116
338872	BC040438	MGC48915	C1QTNF9
715	BC035220	C1R	C1R
55322	BC021215	FLJ11193	C5orf22
375444	BC036867	FLJ32363	C5orf34
730	BC063851	C7	C7
79020	BC000769	C7orf25	C7orf25
157773	BC031245	C8orf48	C8orf48
203228	BC068445	C9orf72	C9orf72
81617	BC010993	CAB39L	CAB39L
9478	BC015006	CABP1	CABP1
27092	BC034532	CACNG4	CACNG4
	BC047021	CADM1	CADM1
285782	BC026194	CAGE1	CAGE1
57658	BC003177	CALCOCO1	CALCOCO1
800	BC040354	CALD1	CALD1
125972	BC014595	CALR3	CALR3
813	BC013383	CALU	CALU
816	BC019070	CAMK2B	CAMK2B
823	BC008751	CAPN1	CAPN1
726	BC018123	CAPN5	CAPN5
827	BC000730	CAPN6	CAPN6
830	BC005338	CAPZA2	CAPZA2
22900	BC056891	CARD8	CARD8
79800	BC033777	ALS2CR8	CARF
57571	BC036557	KIAA1394	CARNS1
22794	BC050526	CASC3	CASC3
117144	BC032950	CATSPER1	CATSPER1
112464	BC011585	PRKCDBP	CAVIN3
255057	BC028156	C19orf26	CBARP
875	BC010242	CBS	CBS
23468	BC006821	CBX5	CBX5
57805	BC018269	KIAA1967	CCAR2
256309	BC038515	KM-HN-1	CCDC110
130940	BC015395	LOC130940	CCDC148
28952	BC000972	CCDC22	CCDC22
284001	BC040264	LOC284001	CCDC57
220047	BC040280	MGC34732	CCDC83
440193	BC035914	KIAA1509	CCDC88C
896	BC011616	CCND3	CCND3
9134	BC007015	CCNE2	CCNE2
8812	BC015935	CCNK	CCNK
57018	BC038394	CCNL1	CCNL1
9738	BC036654	CP110	CCP110
9236	BC034914	CCPG1	CCPG1
54462	BC030528	KIAA1128	CCSER2
22948	BC006543	CCT5	CCT5
10693	BC027591	CCT6B	CCT6B
8763	BC011522	CD164	CD164
909	BC031645	CD1A	CD1A
910	BC069481	CD1B	CD1B
914	BC033583	CD2	CD2
948	BC008406	CD36	CD36
1043	BC000644	CD52	CD52
3732	BC000726	CD82	CD82
22918	BC028075	C1QR1	CD93
993	BC007401	CDC25A	CDC25A
11135	BC009356	CDC42EP1	CDC42EP1
1014	BC027912	CDH16	CDH16
64072	BC032581	CDH23	CDH23
983	BC014563	CDC2	CDK1
5129	BC011526	PCTK3	CDK18
10263	BC002850	CDK2AP2	CDK2AP2
51265	BC041799	CDKL3	CDKL3
124359	BC069440	CDYL2	CDYL2
92806	BC009263	MGC16385	CENPBD1P
91687	BC033154	C1orf155	CENPL
79682	BC031520	MLF1IP	CENPU
23177	BC002982	KIAA0582	CEP68
80321	BC030598	Cep70	Cep70
79959	BC026307	C18orf9	CEP76
10428	BC000991	CFDP1	CFDP1
3078	BC016755	CFHL1	CFHL1
1073	BC011444	CFL2	CFL2
8837	BC001602	CFLAR	CFLAR
84303	BC006123	CHCHD6	CHCHD6
11261	BC008373	CHP	CHP1
1140	BC011371	CHRNB1	CHRNB1
1142	BC069681	CHRNB3	CHRNB3
113189	BC049214	D4ST1	CHST14
63922	BC018184	CHTF18	CHTF18
148046	BC026041	C19orf23	CIRBP-AS1
9635	BC041096	CLCA2	CLCA2
348174	BC078143	LOC348174	CLEC18A
9685	BC004467	ENTH	CLINT1
6249	BC039081	RSN	CLIP1
1195	BC031549	CLK1	CLK1
1208	BC007061	CLPS	CLPS
57393	BC015099	TMEM27	CLTRN
171425	BC034360	CLYBL	CLYBL
134147	BC001573	LOC134147	CMBL
80790	BC038113	CMIP	CMIP
84319	BC006475	MGC4308	CMSS1
1264	BC022015	CNN1	CNN1
152330	BC026119	CNTN4	CNTN4
116840	BC021134	LIP8	CNTROB
28958	BC002698	HSPC009	COA3
1690	BC007230	COCH	COCH
22796	BC014960	COG2	COG2
83548	BC038953	COG3	COG3
10466	BC068540	COG5	COG5
1277	BC036531	COL1A1	COL1A1
1281	BC028178	COL3A1	COL3A1
1315	BC037280	COPB	COPB1
9276	BC000326	COPB2	COPB2
11316	BC003155	COPE	COPE
26958	BC017443	COPG2	COPG2
56997	BC005171	CABC1	COQ8A
170712	BC035923	COX7B2	COX7B2
79974	BC030538	FLJ21986	CPED1
1368	BC022276	CPM	CPM
29894	BC017232	CPSF1	CPSF1
1374	BC000185	CPT1A	CPT1A
54504	BC016838	CPVL	CPVL
51379	BC023567	CRLF3	CRLF3
49860	BC030807	CRNN	CRNN
158511	BC059947	CSAG1	CSAG1
55790	BC060772	ChGn	CSGALNACT1
114784	BC031871	CSMD2	CSMD2
1448	BC010935	CSN3	CSN3
8530	BC015507	CST7	CST7
1475	BC010379	CSTA	CSTA
1491	BC015807	CTH	CTH
1495	BC031262	CTNNA1	CTNNA1
1500	BC010501	CTNND1	CTNND1
56474	BC034986	CTPS2	CTPS2
1512	BC002479	CTSH	CTSH
2017	BC008799	CTTN	CTTN
2919	BC011976	CXCL1	CXCL1
2920	BC015753	CXCL2	CXCL2
2921	BC016308	CXCL3	CXCL3
26999	BC011762	CYFIP2	CYFIP2
1586	BC062997	CYP17A1	CYP17A1
1545	BC012049	CYP1B1	CYP1B1
78996	BC000168	MGC5242	CYREN
51571	BC003599	FAM49B	CYRIB
9595	BC036449	PSCDBP	CYTIP
147906	BC034052	MGC15476	DACT3
1603	BC009798	DAD1	DAD1
1615	BC000629	DARS	DARS1
55157	BC045173	DARS2	DARS2
51163	BC009472	DBR1	DBR1
9730	BC022792	VprBP	DCAF1
50717	BC080597	WDR42A	DCAF8
140947	BC069608	C5orf20	DCANP1
131566	BC029658	DCBLD2	DCBLD2
51473	BC050704	DCDC2	DCDC2
166614	BC032726	DCAMKL2	DCLK2
55208	BC056669	DCUN1D2	DCUN1D2
1663	BC011264	DDX11	DDX11
55308	BC005162	DDX19A	DDX19A
55661	BC011927	DDX27	DDX27
1655	BC016027	DDX5	DDX5
11056	BC041785	DDX52	DDX52
168400	BC067878	DDX53	DDX53
23258	BC009354	RAB6IP1	DENND5A
201627	BC040291	FLJ34969	DENND6A
9681	BC057797	DEPDC5	DEPDC5
91614	BC030970	LOC91614	DEPDC7
64798	BC012040	DEPDC6	DEPTOR
54921	BC018700	DERPC	DERPC
29940	BC039245	SART2	DSE
1665	BC035974	DHX15	DHX15
54505	BC056219	DHX29	DHX29
23181	BC033718	C21orf106	DIP2A
54769	BC008065	DIRAS2	DIRAS2
115752	BC022089	MGC4562	DIS3L
1738	BC018696	DLD	DLD
10294	BC015809	DNAJA2	DNAJA2
4189	BC028912	DNAJB9	DNAJB9
51277	BC034049	RBJ	DNAJC27
10059	BC024590	DNM1L	DNM1L
26052	BC064546	DNM3	DNM3
23268	BC041628	DNMBP	DNMBP
79930	BC004564	DOK3	DOK3
64174	BC024021	DPEP2	DPEP2
54878	BC030688	DPP8	DPP8
55211	BC032846	DPPA4	DPPA4
84229	BC036667	C16orf50	DRC7
1816	BC009748	DRD5	DRD5
128853	BC056911	DUSP15	DUSP15
80824	BC042101	DUSP16	DUSP16
150290	BC028724	DUSP18	DUSP18
1856	BC014844	DVL2	DVL2
1857	BC032459	DVL3	DVL3
1781	BC015038	DNCI2	DYNC1I2
10969	BC009175	EBNA1BP2	EBNA1BP2
55268	BC044574	ECHDC2	ECHDC2
84417	BC021742	ECRG4	ECRG4
23644	BC064567	RCD-8	EDC4
10085	BC030828	EDIL3	EDIL3
29904	BC032665	EEF2K	EEF2K
114327	BC020210	EFHC1	EFHC1
80258	BC031039	EFHC2	EFHC2
133584	BC063822	FLJ39155	EGFLAM
27102	BC006524	EIF2AK1	EIF2AK1
440275	BC009350	EIF2AK4	EIF2AK4
8665	BC000490	EIF3S5	EIF3F
8666	BC000733	EIF3S4	EIF3G
10480	BC019103	hfl-B5	EIF3M
56478	BC033028	EIF4ENIF1	EIF4ENIF1
7458	BC021214	WBSCR1	EIF4H
2006	BC065566	ELN	ELN
54859	BC000623	FLJ20211	ELP6
23065	BC034589	KIAA0090	EMC1
10328	BC007445	COX4NB	EMC8
146956	BC016470	EME1	EME1
129080	BC046358	EMID1	EMID1
11117	BC007530	EMILIN1	EMILIN1
2025	BC046928	ENO1P	ENO1P
957	BC020966	ENTPD5	ENTPD5
10807	BC014515	SDCCAG3	ENTR1
2036	BC013885	EPB41L1	EPB41L1
2037	BC034718	EPB41L2	EPB41L2
4072	BC014785	TACSTD1	EPCAM
9852	BC064696	EPM2AIP1	EPM2AIP1
2071	BC008820	ERCC3	ERCC3
2073	BC031522	ERCC5	ERCC5
131831	BC036239	MGC39662	ERICH6
11160	BC067765	SPFH2	ERLIN2
56605	BC032823	ERO1LB	ERO1B
11082	BC011989	ESM1	ESM1
2110	BC011890	ETFDH	ETFDH
144363	BC071769	LOC144363	ETFRF1
115704	BC014111	EVI5L	EVI5L
55770	BC080542	SEC5L1	EXOC2
10640	BC041126	SEC10L1	EXOC5
51013	BC022067	EXOSC1	EXOSC1
7430	BC013903	VIL2	EZR
2162	BC027963	F13A1	F13A1
2147	BC051332	F2	F2
2169	BC069625	FABP2	FABP2
90736	BC017571	CXorf44	FAM104B
55007	BC013696	C22orf8	FAM118A
317662	BC015394	KIAA0974	FAM149B1
285596	BC028606	NY-REN-7	FAM153A
90050	BC009073	C14orf152	FAM181A
79632	BC060769	C6orf60	FAM184A
221786	BC040214	DKFZp727G131	FAM200A
63920	BC032603	LOC63920	FAM200C
219738	BC013587	C10orf35	FAM241B
26017	BC017286	FAM32A	FAM32A
170062	BC035026	FAM47B	FAM47B
199870	BC025768	FAM76A	FAM76A
85002	BC007983	FAM86B1	FAM86B1
22909	BC047882	KIAA1018	FAN1
57697	BC036056	FANCM	FANCM
84188	BC017377	MLSTD2	FAR1
10056	BC017783	FARSLB	FARSB
10922	BC000377	FASTK	FASTK
84961	BC007557	FBXL20	FBXL20
54455	BC063864	FBXO42	FBXO42
84824	BC006521	FCRLM1	FCRLA
197258	BC032542	FUK	FCSK
260436	BC062213	C4orf7	FDCSP
10979	BC017327	PLEKHC1	FERMT2
2242	BC035357	FES	FES
55079	BC022464	ZNF312	FEZF2
8817	BC006245	FGF18	FGF18
2260	BC015035	FGFR1	FGFR1
2266	BC007044	FGG	FGG
84067	BC030825	DKFZP566M1046	FHIP1B
2274	BC014397	FHL2	FHL2
387758	BC026873	LOC387758	FIBIN
81608	BC017724	FIP1L1	FIP1L1
2281	BC002614	FKBP1B	FKBP1B
23767	BC020870	FLRT3	FLRT3
2329	BC002780	FMO4	FMO4
2330	BC035687	FMO5	FMO5
116123	BC014341	LOC116123	FMO9P
2332	BC038998	FMR1	FMR1
64838	BC032725	FNDC4	FNDC4
408263	BC022570	MGC27121	FNDC9
8790	BC032308	FPGT	FPGT
143162	BC073954	FRMPD2	FRMPD2
10817	BC010611	FRS3	FRS3
6624	BC000521	FSCN1	FSCN1
117246	BC036710	FTSJ3	FTSJ3
9513	BC051907	FXR2	FXR2
55632	BC000973	KIAA1333	G2E3
9568	BC035071	GPR51	GABBR2
10912	BC000465	GADD45G	GADD45G
130589	BC014916	GALM	GALM
2590	BC041120	GALNT2	GALNT2
2592	BC015045	GALT	GALT
10634	BC011047	GAS2L1	GAS2L1
51313	BC017701	DKFZp434L142	GASK1B
57704	BC011363	GBA2	GBA2
2632	BC012098	GBE1	GBE1
115362	BC031639	GBP5	GBP5
78997	BC009014	GDAP1L1	GDAP1L1
54834	BC013132	GDAP2	GDAP2
51573	BC001538	MIR16	GDE1
2665	BC005145	GDI2	GDI2
54960	BC003607	FAM51A1	GEMIN8
439	BC002651	ASNA1	GET3
85476	BC049210	GFM1	GFM1
2673	BC045641	GFPT1	GFPT1
2687	BC073999	GGTLA1	GGT5
2701	BC072389	GJA4	GJA4
10804	BC038934	GJB6	GJB6
2720	BC007493	GLB1	GLB1
2733	BC030012	GLE1L	GLE1
256710	BC014603	MGC26856	GLIPR1L1
169792	BC033899	GLIS3	GLIS3
51022	BC028113	GLRX2	GLRX2
64396	BC024184	GMCL1L	GMCL2
9535	BC080180	GMFG	GMFG
29926	BC007456	GMPPA	GMPPA
2769	BC013585	GNA15	GNA15
2773	BC025285	GNAI3	GNAI3
29889	BC000107	GNL2	GNL2
26354	BC001024	GNL3	GNL3
2797	BC069362	GNRH2	GNRH2
2799	BC012482	GNS	GNS
2800	BC032853	GOLGA1	GOLGA1
80154	BC007811	FLJ22795	GOLGA2P10
55204	BC013870	GOLPH3L	GOLPH3L
8733	BC006383	GPAA1	GPAA1
2719	BC035972	GPC3	GPC3
2262	BC039730	GPC5	GPC5
56261	BC027588	KIAA1434	GPCPD1
8111	BC069592	GPR68	GPR68
9052	BC003665	GPRC5A	GPRC5A
55890	BC004925	GPRC5C	GPRC5C
9721	BC011672	KIAA0514	GPRIN2
2876	BC007865	GPX1	GPX1
54762	BC028972	DKFZp434C0328	GRAMD1C
65983	BC008590	NS3TP2	GRAMD2B
2891	BC028736	GRIA2	GRIA2
23199	BC037556	KIAA0182	GSE1
2963	BC001771	GTF2F2	GTF2F2
9569	BC018136	GTF2IRD1	GTF2IRD1
83606	BC070109	C22orf13	GUCD1
2983	BC047620	GUCY1B3	GUCY1B1
3001	BC015739	GZMA	GZMA
221613	BC062211	HIST1H2AA	H2AC1
8331	BC066232	HIST1H2AJ	H2AC14
94239	BC014885	H2AFV	H2AZ2
8970	BC014312	HIST1H2BJ	H2BC11
9200	BC010353	PTPLA	HACD1
23438	BC007680	HARSL	HARS2
93323	BC010176	NY-SAR-48	HAUS8
26959	BC022329	HBP1	HBP1
10767	BC001465	HBS1L	HBS1L
9759	BC039904	HDAC4	HDAC4
374659	BC033794	HDDC3	HDDC3
84717	BC000755	HDGF2	HDGFL2
51409	BC000781	HEMK1	HEMK1
113802	BC012198	C1orf59	HENMT1
26091	BC039600	HERC4	HERC4
55008	BC035775	HERC6	HERC6
3073	BC018927	HEXA	HEXA
3074	BC017378	HEXB	HEXB
9146	BC003565	HGS	HGS
29923	BC001863	HIG2	HILPDA
147746	BC034501	HIPK4	HIPK4
55355	BC001940	DKFZp762E1312	HJURP
3134	BC062991	HLA-F	HLA-F
3135	BC021708	HLA-G	HLA-G
56941	BC010125	DC12	HMCES
54511	BC024194	HMGCLL1	HMGCLL1
3181	BC000506	HNRPA2B1	HNRPA2B1
92906	BC017480	HNRPLL	HNRPLL
10236	BC001449	HNRPR	HNRPR
51361	BC011621	HOOK1	HOOK1
29911	BC012443	HOOK2	HOOK2
150280	BC030013	HORMAD2	HORMAD2
3200	BC015180	HOXA3	HOXA3
51144	BC012536	HSD17B12	HSD17B12
3320	BC023006	HSPCA	HSP90AA1
3326	BC004928	HSPCB	HSP90AB1
6782	BC036370	STCH	HSPA13
3329	BC002676	HSPD1	HSPD1
10808	BC037553	HSPH1	HSPH1
3357	BC063123	HTR2B	HTR2B
8692	BC000692	HYAL2	HYAL2
25764	BC019262	HYPK	HYPK
3383	BC015969	ICAM1	ICAM1
3417	BC012846	IDH1	IDH1
3455	BC002793	IFNAR2	IFNAR2
3459	BC005333	IFNGR1	IFNGR1
55764	BC003045	WDR10	IFT122
51668	BC005245	C1orf41	IFT25
3488	BC011453	IGFBP5	IGFBP5
	BC053984	IGHV4-31	IGHV4-31
121457	BC058933	IKIP	IKBIP
3598	BC033705	IL13RA2	IL13RA2
3552	BC013142	IL1A	IL1A
3553	BC008678	IL1B	IL1B
3556	BC053621	IL1RAP	IL1RAP
246778	BC062422	IL27	IL27
9466	BC028003	IL27RA	IL27RA
90865	BC047085	C9orf26	IL33
3575	BC067540	IL7R	IL7R
10994	BC011761	ILVBL	ILVBL
3623	BC006391	INHA	INHA
3624	BC007858	INHBA	INHBA
3628	BC015496	INPP1	INPP1
81556	BC007991	DKFZP564O1664	INTS14
92105	BC009995	MGC16733	INTS4
25896	BC033918	C1orf73	INTS7
79781	BC043504	IQCA	IQCA
80726	BC034327	KIAA1683	IQCN
9922	BC010267	IQSEC1	IQSEC1
3664	BC014852	IRF6	IRF6
3683	BC008777	ITGAL	ITGAL
3696	BC002630	ITGB8	ITGB8
150771	BC034503	KIAA1754L	ITPRIPL1
3713	BC046391	IVL	IVL
55677	BC017012	FLJ10006	IWS1
284359	BC034769	IZUMO1	IZUMO1
23338	BC021962	PHF15	JADE2
3718	BC028068	JAK3	JAK3
9832	BC017354	KIAA0555	JAKMIP2
3728	BC011865	JUP	JUP
151050	BC032837	FLJ23861	KANSL1L
3735	BC004132	KARS	KARS
84056	BC000612	KATNAL1	KATNAL1
79768	BC026234	C15orf29	KATNBL1
25948	BC047107	KBTBD2	KBTBD2
3755	BC006367	KCNG1	KCNG1
90134	BC035815	KCNH7	KCNH7
80333	BC032520	KCNIP4	KCNIP4
56659	BC012779	KCNK13	KCNK13
202559	BC034043	KHDRBS2	KHDRBS2
57691	BC041125	KIAA1586	KIAA1586
113220	BC010626	KIF12	KIF12
10749	BC034993	KIF1C	KIF1C
11004	BC008764	KIF2C	KIF2C
64147	BC030657	KIF9	KIF9
3805	BC041611	KIR2DL4	KIR2DL4
4254	BC069783	KITLG	KITLG
64837	BC034373	KLC2	KLC2
8462	BC063286	KLF11	KLF11
128209	BC049844	ZNF393	KLF17
200942	BC039083	MGC35097	KLHDC8B
90293	BC064576	KLHL13	KLHL13
23276	BC032620	KLHL18	KLHL18
64410	BC028100	ENC2	KLHL25
57542	BC028742	KLHDC5	KLHL42
8302	BC017784	KLRC4	KLRC4
51111	BC002522	SUV420H1	KMT5B
3841	BC047409	KPNA5	KPNA5
55634	BC012569	ZNF673	KRBOX4
3852	BC071906	KRT5	KRT5
3853	BC014152	KRT6A	KRT6A
144501	BC065180	LOC144501	KRT80
79036	BC001080	MGC2749	KXD1
8942	BC000879	KYNU	KYNU
112849	BC012131	C14orf149	L3HYPDH
26013	BC039820	L3MBTL	L3MBTL1
51110	BC000878	LACTB2	LACTB2
3910	BC004241	LAMA4	LAMA4
8649	BC026245	MAP2K1IP1	LAMTOR3
167691	BC050327	C6orf152	LCA5
3937	BC016618	LCP2	LCP2
123169	BC018147	LEO1	LEO1
3958	BC053667	LGALS3	LGALS3
3959	BC002403	LGALS3BP	LGALS3BP
9211	BC022500	LGI1	LGI1
11027	BC017412	LILRA2	LILRA2
54923	BC017016	LIME1	LIME1
3985	BC013051	LIMK2	LIMK2
84719	BC000988	MGC5457	LINC00260
201853	BC036758	MGC4836	LINC00504
284440	BC034236	MGC39821	LINC00663
84894	BC068558	LRRN6A	LINGO1
135927	BC014596	C7orf34	LLCF1
91289	BC014652	LMF2	LMF2
222484	BC036755	LNX2	LNX2
283970	BC063633	LOC283970	LOC283970
554206	BC029609	LOC554206	LOC554206
125336	BC041860	LOXHD1	LOXHD1
84695	BC071865	LOXL3	LOXL3
54947	BC002472	FLJ20481	LPCAT2
23175	BC030537	LPIN1	LPIN1
79414	BC003578	LRFN3	LRFN3
55227	BC003193	LRRC1	LRRC1
9684	BC011377	LRRC14	LRRC14
2615	BC070079	LRRC32	LRRC32
115399	BC035936	DKFZp761L1518	LRRC56
127255	BC020778	LRRC44	LRRIQ3
54674	BC035133	LRRN3	LRRN3
10446	BC034047	LRRN5	LRRN5
90678	BC009239	LRSAM1	LRSAM1
222229	BC030547	DKFZp434K1815	LRWD1
26065	BC016842	FAM61A	LSM14A
25804	BC000387	LSM4	LSM4
4048	BC032528	LTA4H	LTA4H
51631	BC017163	LUC7L2	LUC7L2
206338	BC045809	FLJ90650	LVRN
4062	BC028894	LY6H	LY6H
23643	BC020690	LY96	LY96
55646	BC015796	LYAR	LYAR
127018	BC016711	LYPLAL1	LYPLAL1
131375	BC016747	LYZL4	LYZL4
8567	BC040484	MADD	MADD
4099	BC053347	MAG	MAG
4103	BC017723	MAGEA4	MAGEA4
4105	BC041599	MAGEA6	MAGEA6
4114	BC069784	MAGEB3	MAGEB3
10916	BC000304	MAGED2	MAGED2
64110	BC010056	MAGEF1	MAGEF1
55110	BC010905	FLJ10292	MAGOHB
10892	BC030143	MALT1	MALT1
4123	BC050550	MAN2C1	MAN2C1
7873	BC007282	ARMET	MANF
81631	BC018634	MAP1LC3B	MAP1LC3B
5609	BC038295	MAP2K7	MAP2K7
7786	BC050050	MAP3K12	MAP3K12
9020	BC035576	MAP3K14	MAP3K14
80122	BC034417	YSK4	MAP3K19
5871	BC047865	MAP4K2	MAP4K2
11183	BC036013	MAP4K5	MAP4K5
5602	BC065516	MAPK10	MAPK10
1432	BC031574	MAPK14	MAPK14
54708	BC015480	MARCH5	MARCHF5
220972	BC025394	MARCH8	MARCHF8
9782	BC015031	MATR3	MATR3
8930	BC011752	MBD4	MBD4
51360	BC036465	MBTPS2	MBTPS2
4159	BC069599	MC3R	MC3R
64087	BC065027	MCCC2	MCCC2
23263	BC020208	MCF2L	MCF2L
4174	BC000142	MCM5	MCM5
79892	BC004183	C10orf119	MCMBP
90550	BC034235	C10orf42	MCU
90390	BC008226	THRAP6	MED30
4209	BC054520	MEF2D	MEF2D
92342	BC008679	C1orf156	METTL18
131965	BC022400	MGC24132	METTL6
4236	BC050742	MFAP1	MFAP1
55669	BC040557	MFN1	MFN1
285048	BC032412	MGC40574	MGC40574
92667	BC016869	C20orf72	MGME1
4276	BC016929	MICA	MICA
9645	BC044577	MICAL2	MICAL2
11043	BC017707	MID2	MID2
54471	BC008327	FLJ20232	MIEF1
554202	BC021861	LOC554202	MIR31HG
84848	BC007360	MGC16121	MIR503HG
79003	BC000229	MIS12	MIS12
129531	BC018453	LOC129531	MITD1
221938	BC067905	MMD2	MMD2
55329	BC034991	MNS1	MNS1
55233	BC003398	MOBK1B	MOB1A
4336	BC022471	MOBP	MOBP
55034	BC012079	MOCOS	MOCOS
84315	BC047022	MON1A	MON1A
27136	BC050307	MORC1	MORC1
10933	BC022845	MORF4L1	MORF4L1
4342	BC069569	MOS	MOS
758	BC028035	MPPED1	MPPED1
9019	BC007881	MPZL1	MPZL1
117195	BC067292	MRGPRX3	MRGPRX3
140699	BC057767	C20orf132	MROH8
65008	BC014356	MRPL1	MRPL1
9801	BC030144	MRPL19	MRPL19
11222	BC003375	MRPL3	MRPL3
64983	BC013147	MRPL32	MRPL32
65080	BC012058	MRPL44	MRPL44
57129	BC032522	MRPL47	MRPL47
55173	BC012560	MRPS10	MRPS10
51116	BC013108	MRPS2	MRPS2
56945	BC009296	MRPS22	MRPS22
64432	BC003590	MRPS25	MRPS25
60488	BC015862	MRPS35	MRPS35
931	BC002807	MS4A1	MS4A1
4439	BC041031	MSH5	MSH5
23255	BC040542	KIAA0802	MTCL1
4515	BC002600	MTCP1	MTCP1
92140	BC045642	MTDH	MTDH
26164	BC036716	GTPBP5	MTG2
10797	BC015062	MTHFD2	MTHFD2
54545	BC057393	MTMR12	MTMR12
55613	BC012399	MTMR8	MTMR8
57509	BC033842	MTUS1	MTUS1
135656	BC069477	DPCR1	MUCL3
4615	BC013589	MYD88	MYD88
103910	BC004994	MRLC2	MYL12B
55892	BC033620	MYNN	MYNN
80179	BC008900	MYOHD1	MYO19
4642	BC030602	MYO1D	MYO1D
4653	BC029261	MYOC	MYOC
29104	BC011554	C21orf127	N6AMT1
10003	BC038840	NAALAD2	NAALAD2
140838	BC022552	HDHD4	NANP
9476	BC017842	NAPSA	NAPSA
55226	BC035558	FLJ10774	NAT10
284565	BC023087	MGC8902	NBPF15
4077	BC009808	NBR1	NBR1
57552	BC028734	AADACL1	NCEH1
4690	BC006403	NCK1	NCK1
51517	BC016052	NCKIPSD	NCKIPSD
4691	BC002343	NCL	NCL
10403	BC035617	KNTC2	NDC80
65009	BC011795	NDRG4	NDRG4
4701	BC003102	NDUFA7	NDUFA7
54539	BC010665	NDUFB11	NDUFB11
4712	BC009801	NDUFB6	NDUFB6
121441	BC027605	NEDD1	NEDD1
23327	BC032597	NEDD4L	NEDD4L
79858	BC028587	NEK11	NEK11
4751	BC065932	NEK2	NEK2
4753	BC020544	NELL2	NELL2
81831	BC012381	NETO2	NETO2
25791	BC031573	NGEF	NGEF
79849	BC029042	PDZK2	NHERF4
4830	BC000293	NME1	NME1
29922	BC006983	NME7	NME7
9397	BC006376	NMT2	NMT2
55505	BC008886	NOLA3	NOP10
8602	BC026035	C4orf9	NOP14
51602	BC032592	NOP5/NOP58	NOP58
56654	BC004217	NPDC1	NPDC1
261734	BC040520	NPHP4	NPHP4
10641	BC021984	TUSC4	NPRL2
29959	BC001221	NRBP	NRBP1
3084	BC064587	NRG1	NRG1
10412	BC005288	TINP1	NSA2
55968	BC002801	NSFL1C	NSFL1C
63899	BC057238	NSUN3	NSUN3
79730	BC036568	FLJ14001	NSUN7
4907	BC065937	NT5E	NT5E
50863	BC050716	HNT	NTM
4922	BC010918	NTS	NTS
83594	BC041099	NUDT12	NUDT12
9253	BC001794	NUMBL	NUMBL
9631	BC039257	NUP155	NUP155
53371	BC012559	NUP54	NUP54
51204	BC007744	LOC51204	NUTM2B-AS1
4951	BC069468	OCM	OCM
4957	BC010629	ODF2	ODF2
10724	BC039583	MGEA5	OGA
8473	BC014434	OGT	OGT
4974	BC018050	OMG	OMG
26716	BC048991	OR2H1	OR2H1
81285	BC020768	OR51E2	OR51E2
10956	BC000532	OS9	OS9
114876	BC063420	OSBPL1A	OSBPL1A
114880	BC052259	OSBPL6	OSBPL6
127700	BC018069	C1orf102	OSCP1
734	BC031054	C8orf1	OSGIN2
5008	BC011589	OSM	OSM
9943	BC008726	OXSR1	OXSR1
5025	BC033826	P2RX4	P2RX4
5027	BC011913	P2RX7	P2RX7
27334	BC051875	P2RY10	P2RY10
64805	BC017898	P2RY12	P2RY12
9934	BC034989	P2RY14	P2RY14
55214	BC005029	LEPREL1	P3H2
5042	BC027617	PABPC3	PABPC3
11252	BC008037	PACSIN2	PACSIN2
23569	BC025718	PADI4	PADI4
79447	BC003640	C16orf53	PAGR1
5062	BC069613	PAK2	PAK2
56924	BC035596	PAK6	PAK6
9924	BC024043	USP52	PAN2
51237	BC021275	PACAP	PANO1
164091	BC034015	PAQR7	PAQR7
5073	BC050029	PARN	PARN
5080	BC011953	PAX6	PAX6
55193	BC015323	PB1	PBRM1
5091	BC011617	PC	PC
5094	BC071942	PCBP2	PCBP2
5096	BC013768	PCCB	PCCB
63935	BC013365	C20orf67	PCIF1
9768	BC007101	KIAA0101	PCLAF
10015	BC020066	PDCD6IP	PDCD6IP
204474	BC042607	PDILT	PDILT
5164	BC005811	PDK2	PDK2
5166	BC040239	PDK4	PDK4
10630	BC014668	PDPN	PDPN
5174	BC006496	PDZK1	PDZK1
23481	BC032489	PES1	PES1
5214	BC029138	PFKP	PFKP
5216	BC013439	PFN1	PFN1
93210	BC010652	PERLD1	PGAP3
5226	BC000368	PGD	PGD
55276	BC010087	PGM2	PGM2
1911	BC017748	PHC1	PHC1
51317	BC015714	PHF21A	PHF21A
5257	BC033657	PHKB	PHKB
493911	BC022324	PHOSPHO2	PHOSPHO2
375133	BC072398	LOC375133	PI4KAP2
9063	BC015190	PIAS2	PIAS2
5283	BC004100	PIGH	PIGH
9091	BC006377	PIGQ	PIGQ
55650	BC013568	PIGV	PIGV
80235	BC044640	SMP3	PIGZ
5294	BC035683	PIK3CG	PIK3CG
8503	BC021622	PIK3R3	PIK3R3
29992	BC017812	PILRA	PILRA
29990	BC050547	PILRB	PILRB
23761	BC001482	PISD	PISD
26207	BC007905	PITPNC1	PITPNC1
143689	BC031060	PIWIL4	PIWIL4
9867	BC030826	PJA2	PJA2
5586	BC062620	PKN2	PKN2
5320	BC005919	PLA2G2A	PLA2G2A
5329	BC002788	PLAUR	PLAUR
79887	BC000909	FLJ22662	PLBD1
23236	BC069420	PLCB1	PLCB1
130271	BC063310	PLEKHH2	PLEKHH2
55111	BC008966	PLEKHJ1	PLEKHJ1
80301	BC008744	pp9099	PLEKHO2
51090	BC002760	PLLP	PLLP
84513	BC033025	PPAPDC1B	PLPP5
5358	BC039049	PLS3	PLS3
5373	BC008310	PMM2	PMM2
79070	BC001297	KDELC1	POGLUT2
5424	BC008800	POLD1	POLD1
27434	BC026306	POLM	POLM
9883	BC008794	POM121	POM121
55624	BC001471	POMGNT1	POMGNT1
339010	BC066981	POTE15	POTEB
27068	BC057219	PPA2	PPA2
79144	BC002531	C20orf149	PPDPF
5475	BC036026	PPEF1	PPEF1
8500	BC034046	PPFIA1	PPFIA1
9360	BC001555	PPIG	PPIG
53938	BC007693	PPIL3	PPIL3
8493	BC016480	PPM1D	PPM1D
152926	BC037552	PPM1K	PPM1K
84988	BC007854	PPP1R16A	PPP1R16A
5507	BC012625	PPP1R3C	PPP1R3C
5522	BC032954	PPP2R2C	PPP2R2C
55012	BC010293	C14orf10	PPP2R3C
5530	BC025714	PPP3CA	PPP3CA
5549	BC032498	PRELP	PRELP
29964	BC015975	C6orf49	PRICKLE4
5563	BC069680	PRKAA2	PRKAA2
51422	BC068598	PRKAG2	PRKAG2
5584	BC022016	PRKCI	PRKCI
5590	BC008058	PRKCZ	PRKCZ
23683	BC030706	PRKD3	PRKD3
147011	BC029574	PROCA1	PROCA1
254427	BC017269	C10orf47	PROSER2
27339	BC008719	PRPF19	PRPF19
78994	BC000119	MGC3121	PRR14
84726	BC002872	KIAA0515	PRRC2B
29122	BC033016	TSP50	PRSS50
23550	BC035307	PSD4	PSD4
5673	BC012607	PSG5	PSG5
5675	BC020652	PSG6	PSG6
5690	BC000268	PSMB2	PSMB2
5708	BC007897	PSMD2	PSMD2
56984	BC013356	TNFSF5IP1	PSMG2
9051	BC008602	PSTPIP1	PSTPIP1
5725	BC013694	PTBP1	PTBP1
5743	BC013734	PTGS2	PTGS2
11156	BC003105	PTP4A3	PTP4A3
26469	BC052800	PTPN18	PTPN18
5771	BC008244	PTPN2	PTPN2
25930	BC004881	PTPN23	PTPN23
5780	BC010863	PTPN9	PTPN9
5798	BC007713	PTPRN	PTPRN
51290	BC064522	PTX1	PTX1
9698	BC013398	PUM1	PUM1
11137	BC010921	PWP1	PWP1
5859	BC001772	QARS	QARS1
81890	BC015350	QTRT1	QTRT1
22931	BC015014	RAB18	RAB18
51560	BC002510	RAB6B	RAB6B
55684	BC002945	C9orf86	RABL6
10399	BC014788	GNB2L1	RACK1
5886	BC014026	RAD23A	RAD23A
5889	BC000667	RAD51C	RAD51C
23132	BC024298	SRISNF2L	RAD54L2
26064	BC052988	RAI14	RAI14
5910	BC001816	RAP1GDS1	RAP1GDS1
9771	BC039203	RAPGEF5	RAPGEF5
5919	BC000069	RARRES2	RARRES2
5923	BC040275	RASGRF1	RASGRF1
11228	BC030021	RASSF8	RASSF8
10137	BC012787	RBM12	RBM12
9904	BC004289	RBM19	RBM19
166863	BC028588	MGC27016	RBM46
83759	BC004951	RBM30	RBM4B
10180	BC046643	RBM6	RBM6
10179	BC034381	RBM7	RBM7
159163	BC030018	RBMY1F	RBMY1F
55213	BC038104	RCBTB1	RCBTB1
1102	BC029052	RCBTB2	RCBTB2
55758	BC031608	RCOR3	RCOR3
5962	BC047109	RDX	RDX
	BC060806	RECK	RECK
65055	BC064846	C2orf23	REEP1
51308	BC006218	C5orf19	REEP2
5068	BC036776	REG3A	REG3A
10739	BC051910	RFPL2	RFPL2
55159	BC059371	RFWD3	RFWD3
5990	BC028579	RFX2	RFX2
6003	BC016667	RGS13	RGS13
26166	BC047060	RGS22	RGS22
83695	BC005106	MGC13204	RHNO1
85415	BC036447	RHPN2	RHPN2
26150	BC003024	RIBC2	RIBC2
23504	BC007632	KIAA0318	RIMBP2
85376	BC035246	KIAA1666	RIMBP3
9699	BC043144	RIMS2	RIMS2
84864	BC014928	MINA	RIOX2
55177	BC063844	FAM82C	RMDN3
64795	BC047668	FLJ13910	RMDND5A
80010	BC064937	C9orf76	RMI1
10535	BC011748	RNASEH2A	RNASEH2A
7732	BC053989	ZNF179	RNF112
7737	BC020556	RNF113A	RNF113A
27246	BC054049	ZNF364	RNF115
11342	BC009781	RNF13	RNF13
153830	BC042684	FLJ31951	RNF145
81790	BC013422	RNF170	RNF170
11237	BC000213	RNF24	RNF24
55072	BC012077	RNF31	RNF31
9810	BC006133	RNF40	RNF40
84900	BC011878	FLJ14627	RNFT2
26015	BC000246	RPAP1	RPAP1
84154	BC035314	BXDC1	RPF2
51121	BC017360	RPL26L1	RPL26L1
6161	BC011514	RPL32	RPL32
6164	BC001773	RPL34	RPL34
25873	BC004971	RPL36	RPL36
6166	BC000741	RPL36AL	RPL36AL
113157	BC010523	RPLP0P2	RPLP0P2
6184	BC010839	RPN1	RPN1
56475	BC002908	RPRM	RPRM
6205	BC010187	RPS11	RPS11
	BC072682	RPS14P3	RPS14P3
6234	BC000354	RPS28	RPS28
23223	BC012745	KIAA0690	RRP12
27156	BC008986	RTDR1	RSPH14
89970	BC013173	KIAA1972	RSPRY1
6242	BC004558	RTKN	RTKN
112611	BC010930	RWDD2	RWDD2
6257	BC001167	RXRB	RXRB
10329	BC013152	TMEM5	RXYLT1
6285	BC001766	S100B	S100B
1901	BC018650	EDG1	S1PR1
8698	BC014970	EDG6	S1PR4
6291	BC007026	SAA4	SAA4
64092	BC029112	SAMSN1	SAMSN1
22937	BC020987	SCAP	SCAP
49855	BC015212	ZNF291	SCAPER
29970	BC005947	SCHIP1	SCHIP1
10944	BC007103	SMAP	SCL1A6
92014	BC008500	MCART1	SCL25A51
59342	BC010078	SCPEP1	SCPEP1
	BC006248	SDF2L1	SDF2L1
10483	BC005032	SEC23B	SEC23B
11196	BC063800	SEC23IP	SEC23IP
23231	BC060867	KIAA0746	SEL1L3
8991	BC009084	SELENBP1	SELENBP1
6402	BC020758	SELL	SELL
64218	BC020974	SEMA4A	SEMA4A
57715	BC020960	SEMA4G	SEMA4G
59343	BC040609	SENP2	SENP2
4735	BC033559	SEPTIN2	SEPTIN2
10955	BC006088	TDE1	SERINC3
1992	BC009015	SERPINB1	SERPINB1
462	BC022309	SERPINC1	SERPINC1
710	BC011171	SERPING1	SERPING1
91404	BC047578	SESTD1	SESTD1
55209	BC020956	FLJ10707	SETD5
79918	BC022451	FLJ21148	SETD6
23064	BC032600	ALS4	SETX
9295	BC040436	SFRS11	SFRS11
6432	BC000997	SFRS7	SFRS7
6439	BC032785	SFTPB	SFTPB
27352	BC008078	RUTBC3	SGSM3
10019	BC015786	LNK	SH2B3
56904	BC014635	SH3GLB2	SH3GLB2
30011	BC015806	SH3KBP1	SH3KBP1
79801	BC030699	SHCBP1	SHCBP1
946	BC035359	SIGLEC6	SIGLEC6
140885	BC026692	PTPNS1	SIRPA
122060	BC045177	FLJ30046	SLAIN1
6560	BC021193	SLC12A4	SLC12A4
56996	BC000154	SLC12A9	SLC12A9
9120	BC064832	SLC16A6	SLC16A6
26503	BC020961	SLC17A5	SLC17A5
10560	BC018514	SLC19A2	SLC19A2
55867	BC034384	SLC22A11	SLC22A11
9390	BC035973	SLC22A13	SLC22A13
85413	BC047565	SLC22A16	SLC22A16
63027	BC022217	C6orf85	SLC22A23
9356	BC033682	SLC22A6	SLC22A6
6576	BC008061	SLC25A1	SLC25A1
79751	BC019033	SLC25A22	SLC25A22
5250	BC000998	SLC25A3	SLC25A3
83447	BC022032	SLC25A31	SLC25A31
55972	BC027322	MCFP	SLC25A40
203427	BC019584	LOC203427	SLC25A43
1836	BC059390	SLC26A2	SLC26A2
28965	BC041945	SLC27A6	SLC27A6
6517	BC069615	SLC2A4	SLC2A4
6518	BC035878	SLC2A5	SLC2A5
7780	BC006251	SLC30A2	SLC30A2
7782	BC026089	SLC30A4	SLC30A4
10463	BC016949	SLC30A9	SLC30A9
9197	BC014416	SLC33A1	SLC33A1
6569	BC053349	SLC34A1	SLC34A1
7355	BC035747	SLC35A2	SLC35A2
347734	BC024288	SLC35B2	SLC35B2
120103	BC047374	SLC36A4	SLC36A4
6520	BC001061	SLC3A2	SLC3A2
30061	BC035893	SLC40A1	SLC40A1
55244	BC058882	FLJ10847	SLC47A1
6522	BC028601	SLC4A2	SLC4A2
8884	BC012806	SLC5A6	SLC5A6
28231	BC015727	SLCO4A1	SLCO4A1
91607	BC052586	FLJ34922	SLFN11
139065	BC040986	SLITRK4	SLITRK4
10569	BC010634	SLU7	SLU7
64744	BC021133	SMAP1L	SMAP2
55181	BC020957	FLJ10587	SMG8
23676	BC005948	SMPX	SMPX
55234	BC002876	SMU1	SMU1
9892	BC060818	SNAP91	SNAP91
6623	BC014098	SNCG	SNCG
27044	BC017180	SND1	SND1
79622	BC009179	C16orf33	SNRNP25
6632	BC001721	SNRPD1	SNRPD1
90203	BC019823	C20orf161	SNX21
122809	BC060790	SOCS4	SOCS4
9655	BC032862	SOCS5	SOCS5
9306	BC020082	SOCS6	SOCS6
8470	BC011883	SORBS2	SORBS2
11063	BC033492	SOX30	SOX30
83595	BC071947	SOX7	SOX7
10615	BC000322	SPAG5	SPAG5
9043	BC007524	SPAG9	SPAG9
64650	BC069393	SPANXA2	SPANXA2
83893	BC034496	SPATA16	SPATA16
9825	BC009481	SPATA2	SPATA2
55812	BC008656	SPATA7	SPATA7
246777	BC017998	SPESP1	SPESP1
152185	BC036951	LOC152185	SPICE1
50859	BC013983	SPOCK3	SPOCK3
10252	BC063856	SPRY1	SPRY1
84727	BC002983	SPSB2	SPSB2
55133	BC032538	FLJ10379	SRBD1
6714	BC011566	SRC	SRC
79644	BC002480	SRD5A2L	SRD5A3
57522	BC029919	SRGAP1	SRGAP1
6723	BC000309	SRM	SRM
6732	BC038292	SRPK1	SRPK1
58477	BC065299	SRPRB	SRPRB
135295	BC021715	SRrp35	SRSF12
6749	BC005116	SSRP1	SSRP1
51066	BC052614	LOC51066	SSUH2
6767	BC015317	ST13	ST13
6768	BC030532	ST14	ST14
6769	BC020221	STAC	STAC
26872	BC011802	STEAP1	STEAP1
51765	BC017213	MASK	STK26
65975	BC031231	STK33	STK33
23012	BC028603	STK38L	STK38L
23673	BC046999	STX12	STX12
6814	BC038099	STXBP3	STXBP3
10923	BC010537	SUB1	SUB1
8803	BC027587	SUCLA2	SUCLA2
23213	BC068565	SULF1	SULF1
6820	BC034694	SULT2B1	SULT2B1
391257	BC065723	LOC391257	SUMO1P1
8464	BC050384	SUPT3H	SUPT3H
83787	BC003586	SVH	SVH
55638	BC012082	FLJ20366	SYBU
6850	BC011399	SYK	SYK
10492	BC032643	SYNCRIP	SYNCRIP
6856	BC061887	SYPL1	SYPL1
84258	BC031067	SYT3	SYT3
6860	BC036538	SYT4	SYT4
54843	BC015540	SYTL2	SYTL2
94121	BC014913	SYTL4	SYTL4
6867	BC041391	TACC1	TACC1
151647	BC031566	FAM19A4	TAFA4
6890	BC014081	TAP1	TAP1
55080	BC015017	TAPBPL	TAPBPL
6897	BC000517	TARS	TARS
50838	BC069376	TAS2R13	TAS2R13
50836	BC069551	TAS2R8	TAS2R8
64786	BC028352	TBC1D15	TBC1D15
93594	BC027237	WDR67	TBC1D31
440452	BC058890	LOC440452	TBC1D3P2
23061	BC008919	KIAA0676	TBC1D9B
6904	BC003094	TBCD	TBCD
6907	BC052304	TBL1X	TBL1X
9238	BC014918	TBRG4	TBRG4
10312	BC018133	TCIRG1	TCIRG1
6950	BC000665	TCP1	TCP1
79867	BC009112	FLJ12975	TCTN2
6996	BC037557	TDG	TDG
23424	BC028694	TDRD7	TDRD7
83659	BC014599	TEKT1	TEKT1
55603	BC000683	FAM46A	TENT5A
200424	BC022243	MGC22014	TET3
56159	BC036016	TEX11	TEX11
56157	BC042547	TEX13A	TEX13A
113419	BC020251	TEX261	TEX261
165100	BC034405	MGC35154	TEX44
7032	BC032820	TFF2	TFF2
7037	BC001188	TFRC	TFRC
7040	BC022242	TGFB1	TGFB1
9392	BC020548	TGFBRAP1	TGFBRAP1
7052	BC003551	TGM2	TGM2
10618	BC008461	TGOLN2	TGOLN2
84321	BC006849	THOC3	THOC3
55623	BC000448	THUMPD1	THUMPD1
25917	BC001622	THUMPD3	THUMPD3
7075	BC038239	TIE1	TIE1
7077	BC052605	TIMP2	TIMP2
8277	BC025382	TKTL1	TKTL1
84076	BC028707	TKTL2	TKTL2
7090	BC041831	TLE3	TLE3
7097	BC033756	TLR2	TLR2
51284	BC033651	TLR7	TLR7
3196	BC006356	TLX2	TLX2
22998	BC068200	KIAA1102	TMC4
79905	BC047719	TMC7	TMC7
23023	BC039859	TMCC1	TMCC1
9911	BC053876	TMCC2	TMCC2
255104	BC053600	TMCO4	TMCO4
54664	BC039741	FLJ11273	TMEM106B
	BC070231	TMEM107	TMEM107
66000	BC000568	MGC3040	TMEM108
11070	BC011948	PL6	TMEM115
55281	BC020942	FLJ11000	TMEM140
153339	BC026285	MGC23909	TMEM167A
92703	BC013073	C1orf37	TMEM183A
55266	BC008596	TMEM19	TMEM19
84928	BC057784	FLJ14803	TMEM209
54867	BC068479	FLJ20254	TMEM214
85019	BC006280	C18orf45	TMEM241
90407	BC008043	TMEM41A	TMEM41A
85025	BC065930	TMEM60	TMEM60
80021	BC009981	TMEM62	TMEM62
91147	BC032835	TMEM67	TMEM67
55217	BC025269	TMLHE	TMLHE
4982	BC030155	TNFRSF11B	TNFRSF11B
8742	BC019047	TNFSF12	TNFSF12
10318	BC007666	TNIP1	TNIP1
64759	BC071791	TNS3	TNS3
10043	BC046151	TOM1	TOM1
90313	BC001593	LOC90313	TP53I13
7174	BC039905	TPP2	TPP2
8460	BC013188	TPST1	TPST1
9618	BC001769	TRAF4	TRAF4
22906	BC015922	OIP106	TRAK1
66008	BC041330	ALS2CR3	TRaK2
22878	BC059380	KIAA1012	TRAPPC8
28663	BC025727	TRAV20	TRAV20
7200	BC069375	TRH	TRH
6737	BC010861	TRIM21	TRIM21
373	BC022510	TRIM23	TRIM23
7726	BC032297	TRIM26	TRIM26
85363	BC021258	TRIM5	TRIM5
81844	BC048194	TRIM56	TRIM56
201292	BC013181	TRIM65	TRIM65
55621	BC018302	TRMT1	TRMT1
128229	BC014605	C1orf182	TSACC
10665	BC034774	C6orf10	TSBP1
80746	BC019582	TSEN2	TSEN2
79042	BC000944	TSEN34	TSEN34
706	BC001110	BZRP	TSPO
158248	BC031281	TTC16	TTC16
199223	BC062621	TTC21A	TTC21A
92104	BC042848	FLJ13946	TTC30A
7274	BC058000	TTPA	TTPA
7277	BC009238	TUBA1	TUBA4A
7289	BC032587	TULP3	TULP3
10190	BC024223	TXNDC9	TXNDC9
9352	BC001156	TXNL1	TXNL1
441250	BC068520	MGC87315	TYW1B
9039	BC022853	UBE1C	UBA3
55236	BC031637	FLJ10808	UBA6
7318	BC006378	UBE1L	UBA7
7321	BC005980	UBE2D1	UBE2D1
7326	BC002775	UBE2G1	UBE2G1
84993	BC007913	UBL7	UBL7
134510	BC013425	UBLCP1	UBLCP1
29979	BC039294	UBQLN1	UBQLN1
23304	BC064512	UBR2	UBR2
23190	BC020806	UBXD2	UBXN4
7345	BC005117	UCHL1	UCHL1
7351	BC011737	UCP2	UCP2
7352	BC008392	UCP3	UCP3
23376	BC036379	KIAA0776	UFL1
54600	BC058844	UGT1A9	UGT1A9
7363	BC026264	UGT2B4	UGT2B4
64718	BC011924	UNKL	UNKL
7348	BC063568	UPK1B	UPK1B
80761	BC004304	UPK3B	UPK3B
10975	BC000462	UQCR	UQCR11
81605	BC003581	C9orf74	URM1
83878	BC027910	USHBP1	USHBP1
8615	BC032654	VDP	USO1
54532	BC017382	USP53	USP53
9712	BC042943	USP6NL	USP6NL
10813	BC009649	UTP14A	UTP14A
57050	BC004546	SAS10	UTP3
84916	BC009348	CIRH1A	UTP4
6844	BC019608	VAMP2	VAMP2
114990	BC068575	SLITL2	VASN
7412	BC068490	VCAM1	VCAM1
1462	BC050524	CSPG2	VCAN
7423	BC008818	VEGFB	VEGFB
7424	BC035212	VEGFC	VEGFC
50853	BC000243	VILL	VILL
64601	BC073959	VPS16	VPS16
26276	BC016445	VPS33B	VPS33B
55737	BC002414	VPS35	VPS35
23339	BC068559	VPS39	VPS39
27072	BC044851	VPS41	VPS41
6293	BC032108	VPS52	VPS52
55275	BC029560	FLJ10979	VPS53
51542	BC030275	VPS54	VPS54
51322	BC004258	WAC	WAC
7454	BC012738	WAS	WAS
8936	BC044591	WASF1	WASF1
64743	BC080579	WDR13	WDR13
91833	BC028387	WDR20	WDR20
55339	BC013990	WDR33	WDR33
54521	BC028697	WDR44	WDR44
22911	BC039254	WDR47	WDR47
79084	BC009411	WDR77	WDR77
126248	BC031227	LOC126248	WDR88
29062	BC017246	HSPC049	WDR91
7472	BC029854	WNT2	WNT2
55135	BC002336	WDR79	WRAP53
29060	BC035371	HSPC047
11059	BC036065	WWP1	WWP1
11060	BC000108	WWP2	WWP2
56949	BC007208	XAB2	XAB2
7511	BC007579	XPNPEP1	XPNPEP1
63929	BC001681	LOC63929	XPNPEP3
23039	BC030785	XPO7	XPO7
8565	BC016689	YARS	YARS
90522	BC014974	YIF1B	YIF1B
81555	BC024737	YIPF5	YIPF5
10730	BC023507	YME1L1	YME1L1
253943	BC052970	YTHDF3	YTHDF3
9189	BC015030	ZBED1	ZBED1
9278	BC018541	ZNF297	ZBTB22
9841	BC036731	ZBTB24	ZBTB24
23099	BC008828	ZNF297B	ZBTB43
339487	BC058843	ZBTB8OS	ZBTB8OS
221504	BC014978	ZBTB9	ZBTB9
389874	BC021176	ZCCHC13	ZCCHC13
219654	BC028617	C10orf56	ZCCHC24
254359	BC057833	ZDHHC24	ZDHHC24
25921	BC026967	ZDHHC5	ZDHHC5
64429	BC007213	ZDHHC6	ZDHHC6
60685	BC031481	TEX27	ZFAND3
93550	BC048968	ANUBL1	ZFAND4
7763	BC011018	ZA20D2	ZFAND5
7538	BC009693	ZFP36	ZFP36
124220	BC009722	LOC124220	ZG16B
84460	BC045706	ZMAT1	ZMAT1
79698	BC019598	ZMAT4	ZMAT4
94039	BC011502	ZNF101	ZNF101
219749	BC036038	ZNF25	ZNF25
25799	BC007717	ZNF324	ZNF324
55713	BC024177	ZNF334	ZNF334
92283	BC028631	GIOT-1	ZNF461
118738	BC051323	ZNF488	ZNF488
84838	BC007263	ZNF496	ZNF496
80032	BC009374	ZNF556	ZNF556
79230	BC003020	ZNF557	ZNF557
93134	BC032668	ZNF561	ZNF561
90589	BC007868	ZNF625	ZNF625
27332	BC024000	ZNF638	ZNF638
65251	BC005368	ZNF649	ZNF649
79891	BC025728	ZNF671	ZNF671
342926	BC050038	ZNF677	ZNF677
168417	BC033523	ZNF679	ZNF679
127396	BC016016	ZNF684	ZNF684
90874	BC033126	ZNF697	ZNF697
286075	BC014894	ZNF707	ZNF707
58492	BC062561	ZNF77	ZNF77
199775	BC021822	C19orf9	ZNF99
8882	BC004256	ZNF259	ZPR1
7579	BC011404	ZNF31	ZSCAN20
50626	BC005073	CYHR1	ZTRAF1
79699	BC029832	ZYG11B	ZYG11B
7791	BC008743	ZYX	ZYX
26009	BC035079	ZZZ3	ZZZ3
