# Supplementary material for: A Live Cell Protein Complementation Assay for ORFeome-Wide Probing of Human HOX Interactomes
Source: Cells. 2023 Jan 3;12(1):200. doi: 10.3390/cells12010200 (PMC9818449; doi:10.3390/cells12010200)
Supplement: Supplementary file 1 [file cells-12-00200-s001.zip › Table S5.xlsx]

## Sheet: Feuil1
Supplementary Table S5. List of HOXA9-interacting proteins identified by Cell-PCA screening.
ENTREZ_ID	id	Official_sym	ORF_size	LOG2FC_A9-1	LOG2FC_A9_2	Presence	Final_HOXA9
55324	BC051754	ABCF3	2130	7.28965	0	1	7.28965
86	BC036371	ACTL6A	1290	6.62819	0	1	6.62819
88	BC051770	ACTN2	2685	8.23209	0	1	8.23209
121536	BC022220	AEBP2	888	8.94994	0	1	8.94994
27125	BC063007	AFF4	1062	6.92148	0	1	6.92148
55122	BC000764	AKIRIN2	612	0	7.13258	1	7.13258
25906	BC005156	ANAPC15	366	3.39742	1.68347	2	3.39742
63926	BC022878	ANKEF1	2331	6.41177	0	1	6.41177
54851	BC017798	ANKRD49	720	6.24451	0	1	6.24451
124401	BC050387	ANKS3	1584	7.21078	0	1	7.21078
10541	BC013003	ANP32B	756	0	6.77934	1	6.77934
328	BC008145	APEX1	957	4.54354	1.69288	2	4.54354
57136	BC003501	APMAP	1251	4.50776	4.01708	2	4.50776
80830	BC038950	APOL6	1032	8.71101	0	1	8.71101
79822	BC065274	ARHGAP28	1638	1.95781	1.782	2	1.95781
26084	BC016628	ARHGEF26	906	0	7.18289	1	7.18289
10865	BC067301	ARID5A	1293	6.6314	0	1	6.6314
127829	BC015408	ARL8A	561	0	6.41998	1	6.41998
405	BC060838	ARNT	1251	6.71973	0	1	6.71973
406	BC041129	ARNTL	1878	7.21257	0	1	7.21257
51130	BC006488	ASB3	1557	6.2604	0	1	6.2604
468	BC016855	ATF4	1056	7.50383	0	1	7.50383
1388	BC008394	ATF6B	957	2.41585	3.14824	2	3.14824
472	BC061584	ATM	339	6.34873	0	1	6.34873
23300	BC002701	ATMIN	2004	7.6014	0	1	7.6014
535	BC032398	ATP6V0A1	2514	7.10392	0	1	7.10392
29994	BC012576	BAZ2B	1932	6.53201	0	1	6.53201
129880	BC044593	BBS5	1026	2.74356	2.30676	2	2.74356
8915	BC053617	BCL10	702	7.50335	0	1	7.50335
255877	BC059404	BCL6B	1443	7.88387	0	1	7.88387
54880	BC063536	BCOR	564	7.55105	0	1	7.55105
617	BC000416	BCS1L	1260	2.43401	1.93866	2	2.43401
7439	BC015220	BEST1	1497	0	8.39738	1	8.39738
8548	BC020716	BLZF1	1203	8.88716	0	1	8.88716
648	BC011652	BMI1	981	7.27594	0	1	7.27594
10902	BC008039	BRD8	2763	6.28688	0	1	6.28688
11120	BC016661	BTN2A1	1005	8.39994	0	1	8.39994
53838	BC011765	C11orf24	1350	0	6.26828	1	6.26828
79703	BC028240	C11orf80	1569	6.56986	0	1	6.56986
60314	BC051871	C12orf10	1131	3.16912	2.36719	2	3.16912
144608	BC038836	C12orf60	738	0	6.2694	1	6.2694
719	BC020742	C3AR1	1449	0	6.8775	1	6.8775
132989	BC016746	C4orf36	354	0	6.39207	1	6.39207
796	BC069760	CALCA	426	0	6.89772	1	6.89772
817	BC032784	CAMK2D	1437	7.4888	0	1	7.4888
29080	BC020647	CCDC59	726	0	6.68874	1	6.68874
90324	BC011577	CCDC97	1032	2.52805	3.30735	2	3.30735
55602	BC022270	CDKN2AIP	1740	6.30049	0	1	6.30049
1030	BC014469	CDKN2B	417	6.51412	0	1	6.51412
1032	BC001822	CDKN2D	501	6.17313	0	1	6.17313
29956	BC001357	CERS2	1143	1.57385	2.11494	2	2.11494
84191	BC008865	CIAO2A	483	6.09128	0	1	6.09128
1152	BC010002	CKB	1146	2.42638	8.19206	2	8.19206
122616	BC011537	CLBA1	252	0	8.21286	1	8.21286
27098	BC025381	CLUL1	1401	6.1643	0	1	6.1643
91522	BC042428	COL23A1	930	2.59529	1.79261	2	2.59529
9318	BC012629	COPS2	1332	7.11166	0	1	7.11166
1327	BC047869	COX4I1	252	6.38474	0	1	6.38474
1361	BC007057	CPB2	1272	0	7.66121	1	7.66121
1385	BC010636	CREB1	1026	6.56712	0	1	6.56712
10488	BC009402	CREB3	1116	3.66913	3.08446	2	3.66913
64764	BC063666	CREB3L2	744	7.92125	0	1	7.92125
9586	BC059400	CREB5	1005	7.11395	0	1	7.11395
1397	BC000434	CRIP2	627	7.7654	0	1	7.7654
1407	BC030519	CRY1	1761	7.2891	0	1	7.2891
1427	BC069478	CRYGS	537	2.77086	3.1609	2	3.1609
1455	BC018693	CSNK1G2	1248	2.67688	1.72048	2	2.67688
255193	BC029585	CSNK1G2-AS1	729	2.22477	1.50553	2	2.22477
1457	BC011668	CSNK2A1	1176	2.32423	4.39418	2	4.39418
79848	BC022867	CSPP1	1140	0	6.87061	1	6.87061
81566	BC017221	CSRNP2	1632	6.49793	0	1	6.49793
1472	BC065714	CST4	426	6.7658	0	1	6.7658
1487	BC053320	CTBP1	1290	3.64233	2.37907	2	3.64233
1488	BC037900	CTBP2	1542	8.37747	0	1	8.37747
10664	BC014267	CTCF	2184	7.96555	0	1	7.96555
1543	BC023019	CYP1A1	1539	0	7.38319	1	7.38319
260293	BC028102	CYP4X1	1530	0	7.59246	1	7.59246
26528	BC012062	DAZAP1	1224	2.7434	3.12913	2	3.12913
414301	BC022017	DDI1	1191	8.15816	0	1	8.15816
1649	BC003637	DDIT3	510	7.83036	0	1	7.83036
11218	BC031062	DDX20	2475	7.10873	0	1	7.10873
79039	BC001132	DDX54	675	3.40342	3.15319	2	3.40342
1659	BC044586	DHX8	3645	0	6.82197	1	6.82197
11083	BC012757	DIDO1	1437	0	7.16068	1	7.16068
22943	BC001539	DKK1	801	7.75596	0	1	7.75596
1747	BC012361	DLX3	864	6.51159	4.01611	2	6.51159
1761	BC040847	DMRT1	1122	6.96486	0	1	6.96486
9093	BC032100	DNAJA3	1362	4.06783	1.65727	2	4.06783
3300	BC047056	DNAJB2	834	3.0083	1.72141	2	3.0083
10049	BC002446	DNAJB6	981	2.72553	3.96532	2	3.96532
23341	BC047363	DNAJC16	2349	0	7.19928	1	7.19928
10072	BC001446	DPP3	2214	7.16692	0	1	7.16692
1810	BC002809	DR1	531	6.84449	0	1	6.84449
54920	BC006527	DUS2	1482	3.51084	2.74406	2	3.51084
1870	BC007609	E2F2	252	5.17792	1.76524	2	5.17792
11319	BC000721	ECD	1935	6.46499	0	1	6.46499
51295	BC008279	ECSIT	891	8.38284	0	1	8.38284
10876	BC069407	EDDM3A	444	6.51219	0	1	6.51219
1907	BC034393	EDN2	537	7.0398	0	1	7.0398
1958	BC073983	EGR1	1632	6.61559	0	1	6.61559
23741	BC007944	EID1	564	7.43329	0	1	7.43329
493861	BC027612	EID3	1002	7.81263	0	1	7.81263
3692	BC001119	EIF6	738	0	7.34908	1	7.34908
2002	BC056150	ELK1	1287	8.41015	0	1	8.41015
2005	BC063676	ELK4	1218	7.69195	0	1	7.69195
6923	BC013306	ELOB	357	1.83546	1.53045	2	1.83546
80314	BC036529	EPC1	2442	7.55413	0	1	7.55413
1161	BC009793	ERCC8	618	7.03496	0	1	7.03496
2077	BC022231	ERF	1647	8.14425	0	1	8.14425
2078	BC040168	ERG	1440	3.87098	5.95333	2	5.95333
57222	BC012766	ERGIC1	873	0	7.60066	1	7.60066
57471	BC026345	ERMN	855	7.23611	0	1	7.23611
2104	BC064700	ESRRG	1329	7.2817	0	1	7.2817
23344	BC013880	ESYT1	2952	6.74685	0	1	6.74685
2118	BC007242	ETV4	624	8.28411	0	1	8.28411
2145	BC015882	EZH1	2244	7.87086	0	1	7.87086
2168	BC032801	FABP1	384	1.54143	2.02132	2	2.02132
80011	BC063409	FAM192A	246	0	7.16631	1	7.16631
2212	BC020823	FCGR2A	951	1.57992	2.19962	2	2.19962
2258	BC034340	FGF13	738	0	6.19377	1	6.19377
2353	BC004490	FOS	1143	7.75248	7.37347	2	7.75248
3171	BC016024	FOXA3	1053	6.08279	0	1	6.08279
2305	BC006192	FOXM1	2247	8.34926	0	1	8.34926
2309	BC021224	FOXO3	2022	6.5043	0	1	6.5043
79443	BC007218	FYCO1	768	7.04045	0	1	7.04045
126626	BC027033	GABPB2	1347	7.25776	0	1	7.25776
2562	BC010641	GABRB3	1422	0	7.38319	1	7.38319
2580	BC008668	GAK	1251	1.94559	1.97983	2	1.97983
79690	BC012976	GAL3ST4	1461	7.2891	5.66329	2	7.2891
57798	BC019350	GATAD1	810	6.16189	0	1	6.16189
57459	BC069419	GATAD2B	1782	6.20359	0	1	6.20359
23464	BC014457	GCAT	1260	0	6.76421	1	6.76421
55303	BC020657	GIMAP4	990	7.53247	0	1	7.53247
84656	BC064940	GLYR1	1455	6.92552	0	1	6.92552
10691	BC001473	GMEB1	1692	3.68445	6.39746	2	6.39746
127845	BC058832	GOLT1A	399	1.52302	2.69288	2	2.69288
11321	BC007451	GPN1	1125	7.96555	0	1	7.96555
57822	BC036890	GRHL3	1668	7.71205	4.82624	2	7.71205
2952	BC007065	GSTT1	723	6.9364	0	1	6.9364
2967	BC065250	GTF2H3	927	7.08406	0	1	7.08406
2976	BC000212	GTF3C2	1758	8.15785	0	1	8.15785
8908	BC023152	GYG2	1413	0	6.6008	1	6.6008
3002	BC030195	GZMB	744	5.24413	1.62194	2	5.24413
55506	BC016172	H2AFY2	1119	8.0492	2.47479	2	8.0492
3047	BC010913	HBG1	444	6.6314	0	1	6.6314
3059	BC016758	HCLS1	1461	1.66453	6.74927	2	6.74927
79885	BC009676	HDAC11	1044	8.95123	0	1	8.95123
8841	BC000614	HDAC3	1287	4.58976	1.96239	2	4.58976
10013	BC013737	HDAC6	3192	7.83441	0	1	7.83441
124790	BC025970	HEXIM2	861	8.59283	0	1	8.59283
23493	BC007707	HEY2	1014	7.55105	0	1	7.55105
26275	BC005190	HIBCH	1002	6.26266	0	1	6.26266
8363	BC017361	HIST1H4J	312	2.67499	2.21952	2	2.67499
3107	BC004489	HLA-C	1101	0	6.26913	1	6.26913
3131	BC036093	HLF	888	7.73998	0	1	7.73998
10363	BC021959	HMG20A	1044	6.72982	0	1	6.72982
3159	BC008832	HMGA1	324	2.19177	1.8798	2	2.19177
127540	BC021180	HMGB4	561	0	7.35236	1	7.35236
3198	BC032547	HOXA1	1008	4.06506	7.20274	2	7.20274
3206	BC071843	HOXA10	285	9.10082	0	1	9.10082
3202	BC013682	HOXA5	813	4.0394	3.42159	2	4.0394
3248	BC018986	HPGD	801	1.9647	1.99261	2	1.99261
23640	BC001236	HSPBP1	1089	3.24364	3.2204	2	3.24364
10553	BC015358	HTATIP2	729	7.28854	0	1	7.28854
27336	BC009896	HTATSF1	2268	7.78529	0	1	7.78529
3609	BC064836	ILF3	2121	8.88173	0	1	8.88173
3613	BC031560	IMPA2	258	7.24432	4.97963	2	7.24432
3661	BC009395	IRF3	1359	6.47311	0	1	6.47311
3663	BC004139	IRF5	1497	8.89093	0	1	8.89093
10379	BC035716	IRF9	1182	6.30732	0	1	6.30732
9636	BC009507	ISG15	498	3.72424	6.93943	2	6.93943
3726	BC004250	JUNB	1044	6.02131	0	1	6.02131
9817	BC015945	KEAP1	1875	6.81839	0	1	6.81839
9314	BC030811	KLF4	1515	6.01227	0	1	6.01227
1316	BC004301	KLF6	783	2.64321	2.02646	2	2.64321
8609	BC012919	KLF7	693	1.91068	2.09518	2	2.09518
151230	BC010437	KLHL23	1677	4.18254	3.19839	2	4.18254
10314	BC028685	LANCL1	1200	6.95443	0	1	6.95443
3927	BC007560	LASP1	972	6.15137	0	1	6.15137
7462	BC001609	LAT2	732	2.36875	2.64408	2	2.64408
81606	BC012373	LBH	384	7.10873	0	1	7.10873
3939	BC067223	LDHA	999	7.55444	0	1	7.55444
51176	BC050632	LEF1	1200	6.97223	0	1	6.97223
89884	BC011759	LHX4	1173	8.91719	0	1	8.91719
79727	BC028566	LIN28A	630	6.52189	4.47097	2	6.52189
84856	BC007394	LINC00839	345	5.72529	3.09143	2	5.72529
157638	BC052957	LRATD2	933	4.00513	3.87151	2	4.00513
55222	BC024001	LRRC20	555	7.42962	0	1	7.42962
57408	BC040732	LRTM1	810	1.57767	5.16068	2	5.16068
23658	BC005938	LSM5	276	6.35966	0	1	6.35966
11157	BC016026	LSM6	243	6.80012	0	1	6.80012
4110	BC004479	MAGEA11	960	4.97085	5.7626	2	5.7626
115416	BC012331	MALSU1	705	1.6313	2.2431	2	2.2431
4188	BC007836	MDFI	741	6.75969	0	1	6.75969
9440	BC021101	MED17	1956	6.28577	0	1	6.28577
9862	BC011375	MED24	2970	7.2075	0	1	7.2075
51003	BC012539	MED31	396	6.09669	0	1	6.09669
4222	BC069474	MEOX1	765	8.22004	0	1	8.22004
4223	BC017021	MEOX2	912	6.84499	0	1	6.84499
56257	BC016396	MEPCE	663	7.18567	0	1	7.18567
10227	BC014979	MFSD10	1368	2.65194	2.81424	2	2.81424
54531	BC028203	MIER2	1530	8.32103	0	1	8.32103
80013	BC067799	MINDY3	1338	1.58103	2.385	2	2.385
84245	BC001703	MRI1	1110	1.99795	4.17694	2	4.17694
9112	BC006177	MTA1	768	6.57046	0	1	6.57046
10608	BC002713	MXD4	177	7.33259	0	1	7.33259
85366	BC069627	MYLK2	1791	7.81698	0	1	7.81698
4656	BC053899	MYOG	675	6.96694	0	1	6.96694
7593	BC053316	MZF1	873	7.06091	0	1	7.06091
4665	BC065931	NAB2	1578	8.44733	0	1	8.44733
23310	BC011408	NCAPD3	1023	8.24165	0	1	8.24165
8440	BC000103	NCK2	1143	3.48548	3.40226	2	3.48548
23413	BC004856	NCS1	573	7.88935	4.22119	2	7.88935
4775	BC001050	NFATC3	3228	8.83756	0	1	8.83756
4778	BC005044	NFE2	1122	7.32751	0	1	7.32751
4779	BC010623	NFE2L1	2229	7.14629	0	1	7.14629
4790	BC051765	NFKB1	2910	6.89215	0	1	6.89215
4792	BC004983	NFKBIA	954	7.39678	0	1	7.39678
4793	BC015528	NFKBIB	1071	7.44045	0	1	7.44045
1482	BC025711	NKX2-5	975	3.17336	3.0576	2	3.17336
56923	BC067776	NMUR2	1248	6.75302	0	1	6.75302
26155	BC003555	NOC2L	2250	8.05387	0	1	8.05387
8996	BC012798	NOL3	627	4.3335	5.61056	2	5.61056
140688	BC065370	NOL4L	1197	2.5462	3.76471	2	3.76471
65083	BC030139	NOL6	3432	6.90376	0	1	6.90376
8856	BC017304	NR1I2	1137	4.04269	2.52013	2	4.04269
7101	BC028031	NR2E1	1158	7.18011	0	1	7.18011
2908	BC015610	NR3C1	2334	6.18468	0	1	6.18468
2516	BC032501	NR5A1	1386	5.92315	6.74201	2	6.74201
4899	BC016925	NRF1	1569	9.15886	0	1	9.15886
54780	BC005212	NSMCE4A	951	0	6.19377	1	6.19377
11163	BC051310	NUDT4	543	1.61437	2.40497	2	2.40497
26471	BC002434	NUPR1	249	6.03606	0	1	6.03606
9885	BC000296	OSBPL2	1443	5.82222	5.1035	2	5.82222
64172	BC011904	OSGEPL1	1245	6.65678	0	1	6.65678
8974	BC035813	P4HA2	1602	0	7.91767	1	7.91767
5036	BC007561	PA2G4	1185	7.45648	0	1	7.45648
5049	BC000398	PAFAH1B2	690	5.08406	2.36257	2	5.08406
9506	BC010897	PAGE4	309	0	7.27873	1	7.27873
10298	BC002921	PAK4	1281	0	6.49825	1	6.49825
54873	BC012570	PALMD	1656	0	6.43496	1	6.43496
80025	BC009421	PANK2	405	6.72219	0	1	6.72219
7849	BC001060	PAX8	1353	6.06953	0	1	6.06953
57326	BC016852	PBXIP1	2196	6.69237	0	1	6.69237
5092	BC006324	PCBD1	315	4.92545	2.77041	2	4.92545
84108	BC007602	PCGF6	834	6.28059	0	1	6.28059
11235	BC002506	PDCD10	639	0	7.74564	1	7.74564
5187	BC072458	PER1	885	5.84316	3.33279	2	5.84316
11331	BC014766	PHB2	900	7.09677	0	1	7.09677
51105	BC050655	PHF20L1	972	6.32229	0	1	6.32229
29085	BC024648	PHPT1	378	1.89622	1.55064	2	1.89622
10401	BC001154	PIAS3	1860	7.79273	0	1	7.79273
51588	BC066895	PIAS4	1533	2.09244	1.67916	2	2.09244
5279	BC006539	PIGC	894	2.78734	2.83353	2	2.83353
54478	BC013966	PIMREG	717	2.2386	1.91836	2	2.2386
5303	BC005234	PIN4	396	6.24108	0	1	6.24108
5307	BC009412	PITX1	945	4.7029	3.08297	2	4.7029
114780	BC014157	PKD1L2	921	5.7149	2.38866	2	5.7149
5356	BC020786	PLRG1	1518	6.98391	0	1	6.98391
661	BC004484	POLR3D	1197	7.18567	0	1	7.18567
51371	BC003390	POMP	426	1.66736	1.87173	2	1.87173
5451	BC003571	POU2F1	2232	6.92291	0	1	6.92291
5452	BC006101	POU2F2	1203	6.13996	0	1	6.13996
5468	BC006811	PPARG	1434	8.25833	0	1	8.25833
5473	BC028217	PPBP	387	0	6.87061	1	6.87061
5516	BC012022	PPP2CB	930	6.42324	0	1	6.42324
5527	BC016183	PPP2R5C	1155	6.47554	0	1	6.47554
63978	BC052311	PRDM14	1716	6.88874	0	1	6.88874
8575	BC009470	PRKRA	942	0	6.48929	1	6.48929
5635	BC009012	PRPSAP1	1071	5.27426	2.79847	2	5.27426
124221	BC041609	PRSS30P	441	7.14853	3.33412	2	7.14853
5705	BC001932	PSMC5	1221	8.6811	0	1	8.6811
5715	BC002383	PSMD9	672	3.48648	2.96127	2	3.48648
5800	BC035960	PTPRO	1794	4.41143	5.37851	2	5.37851
8226	BC012494	PUDP	645	7.72996	0	1	7.72996
5915	BC060794	RARB	1347	7.5624	0	1	7.5624
23543	BC025281	RBFOX2	1143	6.52721	0	1	6.52721
10432	BC000488	RBM14	2010	6.22335	0	1	6.22335
116362	BC063013	RBP7	405	0	6.12681	1	6.12681
1827	BC002864	RCAN1	594	7.86493	0	1	7.86493
5991	BC067778	RFX3	1242	7.39678	0	1	7.39678
5998	BC019039	RGS3	525	6.49442	0	1	6.49442
8490	BC030059	RGS5	546	6.28392	4.51205	2	6.28392
6015	BC002922	RING1	1221	7.64789	0	1	7.64789
11035	BC041668	RIPK3	522	8.21723	0	1	8.21723
6017	BC004199	RLBP1	954	7.81186	2.13086	2	7.81186
6049	BC034688	RNF6	2058	6.73227	0	1	6.73227
9025	BC007517	RNF8	1458	2.482	2.74298	2	2.74298
6097	BC031554	RORC	1557	7.18468	0	1	7.18468
285855	BC073890	RPL7L1	741	9.06722	0	1	9.06722
6223	BC000023	RPS19	438	0	6.41857	1	6.41857
6235	BC035313	RPS29	171	3.04188	2.23358	2	3.04188
80230	BC032571	RUFY1	1803	4.89045	7.29921	2	7.29921
10856	BC008355	RUVBL2	780	6.86276	0	1	6.86276
10066	BC004385	SCAMP2	990	1.75088	1.72845	2	1.75088
29106	BC014539	SCG3	1407	0	6.67299	1	6.67299
51540	BC007891	SCLY	1338	6.97407	4.46763	2	6.97407
51150	BC011244	SDF4	1089	6.99932	0	1	6.99932
55176	BC026179	SEC61A2	1257	6.62994	0	1	6.62994
11231	BC048287	SEC63	2283	0	8.29416	1	8.29416
85465	BC021229	SELENOI	777	0	6.1035	1	6.1035
151011	BC020502	SEPTIN10	1365	6.32121	0	1	6.32121
6317	BC005224	SERPINB3	1173	0	7.45779	1	7.45779
117157	BC022407	SH2D1B	399	1.80535	3.21666	2	3.21666
6474	BC008829	SHOX2	1068	7.62936	4.45279	2	7.62936
150094	BC038504	SIK1	2352	6.23764	0	1	6.23764
25942	BC066364	SIN3A	471	7.71039	0	1	7.71039
4089	BC002379	SMAD4	1659	6.22149	0	1	6.22149
6601	BC013045	SMARCC2	3393	6.39438	0	1	6.39438
29886	BC021565	SNX8	1398	7.52716	0	1	7.52716
6652	BC021085	SORD	1074	0	6.0321	1	6.0321
6663	BC002824	SOX10	1401	6.99797	0	1	6.99797
6657	BC013923	SOX2	954	2.31423	6.08023	2	6.08023
6668	BC016680	SP2	1821	7.62352	0	1	7.62352
170463	BC000274	SSBP4	1158	7.29646	0	1	7.29646
6757	BC002818	SSX2	672	1.89704	2.64474	2	2.64474
6759	BC005325	SSX4	567	6.62384	0	1	6.62384
6772	BC002704	STAT1	2139	6.27761	0	1	6.27761
6774	BC000627	STAT3	2310	6.65277	0	1	6.65277
6776	BC027036	STAT5A	2385	8.07596	0	1	8.07596
30968	BC010152	STOML2	1071	2.79912	1.98604	2	2.79912
6809	BC007405	STX3	870	6.0237	0	1	6.0237
6829	BC024203	SUPT5H	3264	6.46303	0	1	6.46303
203328	BC014601	SUSD3	768	2.78034	2.48834	2	2.78034
79953	BC030637	SYNDIG1	777	6.71973	0	1	6.71973
6871	BC001172	TADA2A	918	3.19625	3.06979	2	3.19625
10629	BC008785	TAF6L	1380	2.59499	5.49245	2	5.49245
132001	BC015088	TAMM41	951	2.47721	1.66073	2	2.47721
1155	BC005969	TBCB	735	5.40808	4.73787	2	5.40808
50945	BC014194	TBX22	1563	7.21043	0	1	7.21043
6919	BC050623	TCEA2	729	5.11257	5.75906	2	5.75906
6938	BC050556	TCF12	2121	9.11155	0	1	9.11155
6941	BC002493	TCF19	1038	8.13761	0	1	8.13761
22980	BC000959	TCF25	2031	7.87578	0	1	7.87578
7020	BC017754	TFAP2A	1296	8.55121	6.92434	2	8.55121
7023	BC010576	TFAP4	1017	7.61397	0	1	7.61397
7024	BC003634	TFCP2	1509	7.84937	0	1	7.84937
7050	BC000814	TGIF1	819	3.40496	1.58094	2	3.40496
7088	BC010100	TLE1	2313	8.82871	0	1	8.82871
7089	BC017364	TLE2	2232	7.47184	0	1	7.47184
30012	BC017291	TLX3	876	3.3612	3.80326	2	3.80326
83604	BC039242	TMEM47	546	0	6.93734	1	6.93734
29767	BC064961	TMOD2	1056	2.55741	3.59342	2	3.59342
8995	BC069319	TNFSF18	534	6.46761	0	1	6.46761
7135	BC012601	TNNI1	564	6.03578	0	1	6.03578
7139	BC002653	TNNT2	858	0	6.22501	1	6.22501
50852	BC025713	TRAT1	561	6.83946	0	1	6.83946
10626	BC053514	TRIM16	1695	8.87036	0	1	8.87036
10346	BC035582	TRIM22	1497	1.89326	1.54631	2	1.89326
5987	BC066924	TRIM27	1542	6.26898	0	1	6.26898
23650	BC017352	TRIM29	1767	8.16962	0	1	8.16962
9322	BC013002	TRIP10	1638	0	6.32948	1	6.32948
9321	BC002656	TRIP11	243	8.90593	0	1	8.90593
9325	BC012448	TRIP4	1746	7.48607	0	1	7.48607
55503	BC034814	TRPV6	321	9.04237	0	1	9.04237
26526	BC029908	TSPAN16	483	7.80851	0	1	7.80851
283237	BC053665	TTC9C	516	6.65191	0	1	6.65191
83887	BC030650	TTLL2	1779	0	6.62527	1	6.62527
56652	BC033762	TWNK	1521	6.55766	0	1	6.55766
51619	BC004104	UBE2D4	444	0	7.61706	1	7.61706
55585	BC015316	UBE2Q1	216	1.8331	3.48682	2	3.48682
7337	BC009271	UBE3A	1758	6.1152	0	1	6.1152
7409	BC013361	VAV1	2373	8.35826	0	1	8.35826
63894	BC015054	VIPAS39	1482	7.6414	0	1	7.6414
164684	BC022549	WBP2NL	603	7.23936	0	1	7.23936
7485	BC012415	WRB	525	0	6.42559	1	6.42559
29799	BC074501	YPEL1	360	2.61236	2.33449	2	2.61236
7529	BC001359	YWHAB	741	6.17911	0	1	6.17911
7704	BC026902	ZBTB16	2022	0	6.27873	1	6.27873
29063	BC016914	ZCCHC4	618	0	6.6008	1	6.6008
84885	BC048251	ZDHHC12	969	0	6.3194	1	6.3194
54503	BC056152	ZDHHC13	1869	7.27165	0	1	7.27165
463	BC029653	ZFHX3	2661	7.32445	0	1	7.32445
7695	BC006421	ZNF136	1623	7.1469	0	1	7.1469
7728	BC052997	ZNF175	2136	6.38474	0	1	6.38474
7752	BC012909	ZNF200	1188	7.04111	0	1	7.04111
7753	BC013382	ZNF202	1947	3.90668	2.13688	2	3.90668
7760	BC007287	ZNF213	1380	6.90929	0	1	6.90929
51222	BC000694	ZNF219	2163	6.87135	0	1	6.87135
58500	BC017091	ZNF250	1533	6.91409	0	1	6.91409
7574	BC046206	ZNF26	1602	6.06953	0	1	6.06953
10127	BC008805	ZNF263	2052	7.71205	0	1	7.71205
162979	BC019352	ZNF296	1428	6.27314	0	1	6.27314
55900	BC024176	ZNF302	1200	6.73444	0	1	6.73444
6940	BC047105	ZNF354A	1818	7.51412	0	1	7.51412
57541	BC043295	ZNF398	1929	6.36562	0	1	6.36562
7592	BC015023	ZNF41	2340	8.26369	0	1	8.26369
79744	BC008297	ZNF419	1533	6.39232	0	1	6.39232
79088	BC001791	ZNF426	1665	6.52951	0	1	6.52951
7594	BC006528	ZNF43	2430	7.02857	0	1	7.02857
58499	BC036884	ZNF462	2655	6.30889	0	1	6.30889
25888	BC018612	ZNF473	2616	6.25852	0	1	6.25852
91392	BC028377	ZNF502	1635	6.36772	0	1	6.36772
147807	BC014666	ZNF524	795	3.0524	2.64434	2	3.0524
27300	BC067271	ZNF544	2148	7.61147	0	1	7.61147
339327	BC045649	ZNF546	2511	7.10936	0	1	7.10936
147694	BC030788	ZNF548	1602	7.67313	0	1	7.67313
84527	BC006436	ZNF559	1617	7.77255	3.52031	2	7.77255
84924	BC007064	ZNF566	1257	0	7.26322	1	7.26322
84765	BC004992	ZNF577	1437	9.18135	0	1	9.18135
148103	BC044615	ZNF599	1656	8.89821	0	1	8.89821
80110	BC004930	ZNF614	597	7.61235	4.62177	2	7.61235
58491	BC014280	ZNF71	1470	7.15744	0	1	7.15744
7627	BC051366	ZNF75A	462	9.41557	0	1	9.41557
79724	BC013760	ZNF768	1563	7.34731	0	1	7.34731
7633	BC062309	ZNF79	1497	7.23343	0	1	7.23343
7554	BC039323	ZNF8	1728	8.9384	0	1	8.9384
7639	BC008688	ZNF85	168	8.66014	0	1	8.66014
80345	BC004255	ZSCAN16	1047	8.29774	0	1	8.29774
7589	BC047309	ZSCAN21	1422	7.81954	0	1	7.81954
64288	BC065241	ZSCAN31	744	7.2891	0	1	7.2891
7746	BC010374	ZSCAN9	1185	5.42253	4.98277	2	5.42253
55849	BC005336		498	4.2765	5.79343	2	5.79343
