# Supplementary material for: A Live Cell Protein Complementation Assay for ORFeome-Wide Probing of Human HOX Interactomes
Source: Cells. 2023 Jan 3;12(1):200. doi: 10.3390/cells12010200 (PMC9818449; doi:10.3390/cells12010200)
Supplement: Supplementary file 1 [file cells-12-00200-s001.zip › Table S6.xlsx]

## Sheet: Feuil1
Supplementary Table S6. List of HOXA9W-interacting proteins identified by Cell-PCA screening.
ENTREZ_ID	id	Official_sym	ORF_size	LOG2FC_A9HX-1	LOG2FC_A9HX_2	Presence	Final_HOXA9HX
86	BC036371	ACTL6A	1290	6.96486	0	1	6.96486
88	BC051770	ACTN2	2685	8.26725	0	1	8.26725
10096	BC044590	ACTR3	1257	6.50303	0	1	6.50303
136	BC025722	ADORA2B	999	2.42491	1.58784	2	2.42491
55122	BC000764	AKIRIN2	612	6.48059	0	1	6.48059
247	BC063647	ALOX15B	2031	6.02459	0	1	6.02459
144193	BC029146	AMDHD1	1281	6.25437	0	1	6.25437
129138	BC014641	ANKRD54	903	2.74239	3.13255	2	3.13255
124401	BC050387	ANKS3	1584	7.22882	0	1	7.22882
8905	BC001117	AP1S2	474	2.18564	1.87983	2	2.18564
10947	BC056257	AP3M2	822	6.64559	0	1	6.64559
57136	BC003501	APMAP	1251	5.11665	3.55128	2	5.11665
389756	BC070322	AQP7P2	258	0	6.30846	1	6.30846
55082	BC071587	ARGLU1	822	5.06752	2.41082	2	5.06752
9938	BC039591	ARHGAP25	1377	0	7.29609	1	7.29609
396	BC016031	ARHGDIA	615	4.01204	3.19997	2	4.01204
79624	BC011348	ARMT1	1326	7.732	0	1	7.732
406	BC041129	ARNTL	1878	7.05137	0	1	7.05137
51008	BC012291	ASCC1	1074	4.76591	7.52669	2	7.52669
443	BC029128	ASPA	942	0	8.03815	1	8.03815
468	BC016855	ATF4	1056	7.37712	0	1	7.37712
1388	BC008394	ATF6B	957	1.81107	3.13375	2	3.13375
23300	BC002701	ATMIN	2004	8.89887	0	1	8.89887
617	BC000416	BCS1L	1260	3.52097	4.34493	2	4.34493
637	BC009197	BID	588	2.02743	2.3717	2	2.3717
660	BC016652	BMX	2028	0	8.16038	1	8.16038
84446	BC016681	BRSK1	1422	5.26978	2.93144	2	5.26978
56673	BC027865	C11orf16	1215	0	6.51907	1	6.51907
205327	BC036456	C2orf69	810	5.56803	4.82375	2	5.56803
57415	BC017772	C3orf14	387	0	7.50001	1	7.50001
735	BC020721	C9	1680	0	6.2075	1	6.2075
835	BC002427	CASP2	1359	7.90304	0	1	7.90304
2694	BC037958	CBLIF	1254	4.14228	6.07382	2	6.07382
920	BC025782	CD4	1377	2.46537	1.5909	2	2.46537
81602	BC009562	CDADC1	300	4.84002	2.2872	2	4.84002
55664	BC014133	CDC37L1	1014	0	8.16611	1	8.16611
64866	BC021099	CDCP1	1032	6.94439	4.05485	2	6.94439
55602	BC022270	CDKN2AIP	1740	6.65363	0	1	6.65363
1088	BC026263	CEACAM8	1050	0	6.51475	1	6.51475
54927	BC014839	CHCHD3	684	6.91313	0	1	6.91313
1152	BC010002	CKB	1146	1.58667	8.48532	2	8.48532
122616	BC011537	CLBA1	252	1.81209	6.07938	2	6.07938
1295	BC013581	COL8A1	2235	6.1035	0	1	6.1035
9318	BC012629	COPS2	1332	0	6.67044	1	6.67044
1352	BC000060	COX10	1332	0	7.54257	1	7.54257
9586	BC059400	CREB5	1005	6.42928	0	1	6.42928
1397	BC000434	CRIP2	627	8.13072	0	1	8.13072
23373	BC028050	CRTC1	1905	6.89869	3.14739	2	6.89869
1427	BC069478	CRYGS	537	2.6218	3.16686	2	3.16686
1472	BC065714	CST4	426	6.47541	0	1	6.47541
10664	BC014267	CTCF	2184	6.8339	0	1	6.8339
8454	BC034318	CUL1	1389	7.51633	0	1	7.51633
26528	BC012062	DAZAP1	1224	3.74991	2.89513	2	3.74991
10238	BC001264	DCAF7	1029	7.3127	0	1	7.3127
28960	BC014532	DCPS	1014	0	6.61971	1	6.61971
1641	BC027925	DCX	1083	7.24031	0	1	7.24031
1649	BC003637	DDIT3	510	6.79779	6.0751	2	6.79779
245932	BC062212	DEFB119	255	7.6014	0	1	7.6014
55635	BC065304	DEPDC1	1584	7.96694	0	1	7.96694
1676	BC007721	DFFA	996	6.5549	0	1	6.5549
54487	BC078147	DGCR8	2223	3.02651	3.10397	2	3.10397
11083	BC012757	DIDO1	1437	6.8268	0	1	6.8268
1746	BC032558	DLX2	987	2.44346	2.26741	2	2.44346
1747	BC012361	DLX3	864	6.9279	0	1	6.9279
1761	BC040847	DMRT1	1122	6.30852	0	1	6.30852
1800	BC017023	DPEP1	1236	6.08066	0	1	6.08066
1810	BC002809	DR1	531	6.53481	0	1	6.53481
51233	BC056888	DRICH1	690	7.83744	0	1	7.83744
51207	BC009778	DUSP13	597	3.37377	2.24972	2	3.37377
1870	BC007609	E2F2	252	6.77189	0	1	6.77189
1877	BC080524	E4F1	2355	3.94322	2.06803	2	3.94322
9166	BC005249	EBAG9	642	1.51343	2.77259	2	2.77259
11319	BC000721	ECD	1935	7.2681	0	1	7.2681
51295	BC008279	ECSIT	891	8.25673	0	1	8.25673
1907	BC034393	EDN2	537	6.27202	0	1	6.27202
399818	BC026167	EEF1AKMT2	579	2.7924	1.89616	2	2.7924
1942	BC032698	EFNA1	618	1.82902	2.1905	2	2.1905
51224	BC036022	ELOA2	2262	6.7046	0	1	6.7046
10436	BC055314	EMG1	735	1.78294	3.90622	2	3.90622
26284	BC019094	ERAL1	1314	6.22612	0	1	6.22612
23071	BC005374	ERP44	1221	5.5656	5.43429	2	5.5656
2104	BC064700	ESRRG	1329	7.45022	0	1	7.45022
55731	BC021228	FAM222B	1689	0	7.28522	1	7.28522
2091	BC019260	FBL	966	6.49761	0	1	6.49761
26127	BC032143	FGFR1OP2	519	4.0705	1.97587	2	4.0705
63943	BC011966	FKBPL	1050	6.09212	0	1	6.09212
2313	BC001670	FLI1	1359	0	8.00551	1	8.00551
8061	BC016648	FOSL1	816	7.05615	0	1	7.05615
29999	BC035606	FSCN3	1497	7.18606	0	1	7.18606
2553	BC050702	GABPB1	1188	2.86158	5.71887	2	5.71887
2624	BC018988	GATA2	1401	2.76081	3.95528	2	3.95528
57798	BC019350	GATAD1	810	6.29793	2.10683	2	6.29793
57459	BC069419	GATAD2B	1782	8.40956	0	1	8.40956
8001	BC036086	GLRA3	1395	6.33342	4.19614	2	6.33342
51228	BC009932	GLTP	630	2.04697	2.25778	2	2.25778
2792	BC029367	GNGT1	225	0	6.3572	1	6.3572
115330	BC014241	GPR146	1002	2.39828	1.77002	2	2.39828
160897	BC033906	GPR180	525	6.32697	0	1	6.32697
1880	BC020752	GPR183	1086	6.9798	3.59032	2	6.9798
2873	BC064503	GPS1	1584	5.93121	5.85798	2	5.93121
57822	BC036890	GRHL3	1668	6.02104	4.76349	2	6.02104
79792	BC008904	GSDMD	1455	0	6.31796	1	6.31796
2958	BC000287	GTF2A2	330	6.0063	0	1	6.0063
3002	BC030195	GZMB	744	4.82528	3.39412	2	4.82528
55766	BC003602	H2AFJ	390	2.80884	2.65274	2	2.80884
3032	BC017564	HADHB	1428	7.86864	0	1	7.86864
3029	BC000840	HAGH	783	1.85049	2.85764	2	2.85764
26762	BC013325	HAVCR1	1095	6.50176	0	1	6.50176
54626	BC012091	HES2	231	2.12308	2.14293	2	2.14293
8361	BC069288	HIST1H4F	312	1.55252	1.53615	2	1.55252
8363	BC017361	HIST1H4J	312	3.96102	2.36802	2	3.96102
8349	BC069193	HIST2H2BE	381	6.22265	0	1	6.22265
126961	BC015544	HIST2H3C	411	2.46642	2.72871	2	2.72871
92815	BC001193	HIST3H2A	393	1.74636	2.30593	2	2.30593
3131	BC036093	HLF	888	6.4545	0	1	6.4545
3216	BC014651	HOXB6	675	2.34026	3.01158	2	3.01158
3232	BC005124	HOXD3	1299	3.41098	2.28377	2	3.41098
9653	BC025990	HS2ST1	690	6.46793	0	1	6.46793
23640	BC001236	HSPBP1	1089	2.1364	2.81701	2	2.81701
10553	BC015358	HTATIP2	729	6.94462	0	1	6.94462
122509	BC015423	IFI27L1	315	4.91456	2.51255	2	4.91456
3447	BC069427	IFNA13	570	6.51602	0	1	6.51602
9235	BC009401	IL32	705	5.09094	2.48081	2	5.09094
3609	BC064836	ILF3	2121	7.89105	0	1	7.89105
64771	BC002328	ILRUN	897	6.10601	0	1	6.10601
3613	BC031560	IMPA2	258	0	6.00552	1	6.00552
23254	BC035501	KAZN	984	7.45058	0	1	7.45058
57535	BC031648	KIAA1324	1992	0	7.59917	1	7.59917
26153	BC009415	KIF26A	612	3.59337	4.46921	2	4.46921
1316	BC004301	KLF6	783	3.17565	2.13877	2	3.17565
23588	BC024192	KLHDC2	1221	7.15137	0	1	7.15137
23633	BC020520	KPNA6	1611	0	7.27493	1	7.27493
91133	BC039316	L3MBTL4	1605	0	6.98407	1	6.98407
84458	BC053359	LCOR	1221	8.35059	0	1	8.35059
137994	BC029541	LETM2	735	7.10308	6.84446	2	7.10308
79727	BC028566	LIN28A	630	6.26114	3.23264	2	6.26114
619434	BC008253	LINC00051	117	1.59808	2.46692	2	2.46692
84298	BC006002	LLPH	390	6.9982	0	1	6.9982
157638	BC052957	LRATD2	933	4.36333	4.3909	2	4.3909
57408	BC040732	LRTM1	810	0	6.80607	1	6.80607
8216	BC026214	LZTR1	1659	6.13381	0	1	6.13381
4117	BC039825	MAK	1374	7.14507	0	1	7.14507
4170	BC017197	MCL1	1053	5.8462	7.40139	2	7.40139
4255	BC000824	MGMT	624	0	6.38949	1	6.38949
54531	BC028203	MIER2	1530	7.16148	0	1	7.16148
80013	BC067799	MINDY3	1338	1.71223	1.86277	2	1.86277
4286	BC012503	MITF	276	4.4991	1.5699	2	4.4991
54903	BC010061	MKS1	1134	3.63871	6.21062	2	6.21062
84245	BC001703	MRI1	1110	2.03472	2.75653	2	2.75653
29093	BC012565	MRPL22	621	8.70777	0	1	8.70777
6150	BC027710	MRPL23	462	0	8.42953	1	8.42953
51023	BC005186	MRPS18C	429	7.15713	0	1	7.15713
4488	BC015509	MSX2	804	8.10622	0	1	8.10622
54516	BC011873	MTRF1L	1143	4.25963	3.9115	2	4.25963
10608	BC002713	MXD4	177	6.03808	2.48167	2	6.03808
79903	BC011267	NAA60	729	4.03913	2.3777	2	4.03913
4681	BC012037	NBL1	543	3.01109	3.65306	2	3.65306
23310	BC011408	NCAPD3	1023	8.25011	0	1	8.25011
79133	BC073158	NDUFAF5	954	3.69719	4.33403	2	4.33403
81607	BC010423	NECTIN4	1533	5.50271	3.6865	2	5.50271
4747	BC039237	NEFL	1632	2.57713	3.16644	2	3.16644
4760	BC009046	NEUROD1	1071	7.86084	0	1	7.86084
4778	BC005044	NFE2	1122	8.08831	0	1	8.08831
4792	BC004983	NFKBIA	954	7.50668	0	1	7.50668
4793	BC015528	NFKBIB	1071	6.62673	0	1	6.62673
1482	BC025711	NKX2-5	975	4.07384	3.65965	2	4.07384
10392	BC040339	NOD1	2862	8.45525	0	1	8.45525
8996	BC012798	NOL3	627	3.82861	6.02011	2	6.02011
51070	BC011249	NOSIP	906	6.83301	0	1	6.83301
9970	BC069626	NR1I3	1059	6.41886	0	1	6.41886
91775	BC009431	NXPE3	1680	6.83946	0	1	6.83946
4942	BC000964	OAT	1320	0	6.94813	1	6.94813
26578	BC007459	OSTF1	654	6.67469	0	1	6.67469
29763	BC011889	PACSIN3	1275	0	6.65878	1	6.65878
152559	BC031256	PAQR3	876	7.43029	0	1	7.43029
7849	BC001060	PAX8	1353	6.1823	0	1	6.1823
286257	BC002613	PAXX	615	2.05311	2.7796	2	2.7796
64773	BC051816	PCED1A	1365	4.67563	2.00638	2	4.67563
84108	BC007602	PCGF6	834	6.2521	0	1	6.2521
64430	BC033843	PCNX4	840	7.36597	0	1	7.36597
5144	BC008390	PDE4D	660	3.78275	2.61551	2	3.78275
5170	BC033494	PDPK1	1290	3.20505	2.65901	2	3.20505
5173	BC026334	PDYN	765	6.93593	0	1	6.93593
5830	BC010621	PEX5	1896	2.51315	3.148	2	3.148
5224	BC001904	PGAM2	762	2.82086	1.56949	2	2.82086
11331	BC014766	PHB2	900	7.05398	0	1	7.05398
5279	BC006539	PIGC	894	3.81066	2.44627	2	3.81066
93183	BC019865	PIGM	1272	0	6.87725	1	6.87725
5306	BC045108	PITPNA	813	4.29955	2.10035	2	4.29955
5307	BC009412	PITX1	945	4.91968	2.48203	2	4.91968
5308	BC013998	PITX2	975	7.20809	0	1	7.20809
10226	BC007566	PLIN3	1305	1.62719	2.47787	2	2.47787
5356	BC020786	PLRG1	1518	6.5373	0	1	6.5373
5359	BC017901	PLSCR1	387	6.24298	0	1	6.24298
5361	BC032432	PLXNA1	303	2.10792	2.51978	2	2.51978
56902	BC008304	PNO1	759	7.10518	0	1	7.10518
5465	BC000052	PPARA	777	2.64605	1.65742	2	2.64605
5468	BC006811	PPARG	1434	7.8874	0	1	7.8874
5498	BC002357	PPOX	1434	5.43962	3.57369	2	5.43962
5499	BC008010	PPP1CA	993	3.58474	2.53277	2	3.58474
4660	BC071166	PPP1R12B	429	2.48437	1.60872	2	2.48437
5502	BC022470	PPP1R1A	516	2.30836	3.00788	2	3.00788
55119	BC053838	PRPF38B	573	7.32841	0	1	7.32841
5635	BC009012	PRPSAP1	1071	7.74886	0	1	7.74886
5757	BC022433	PTMA	333	2.9279	2.9904	2	2.9904
10635	BC006992	RAD51AP1	1008	7.57773	0	1	7.57773
5901	BC014901	RAN	651	2.92312	3.38368	2	3.38368
5949	BC039844	RBP3	3744	2.67576	3.25044	2	3.25044
10171	BC001025	RCL1	1122	2.87531	2.37356	2	2.87531
5985	BC001866	RFC5	1023	3.38576	3.58405	2	3.58405
9827	BC001725	RGP1	1176	6.40122	0	1	6.40122
11035	BC041668	RIPK3	522	6.92362	0	1	6.92362
84934	BC022092	RITA1	810	2.51379	6.9782	2	6.9782
138065	BC013036	RNF183	579	7.82807	0	1	7.82807
6120	BC016764	RPE	687	7.19002	0	1	7.19002
284942	BC019348	RPL23AP82	192	1.59495	1.82464	2	1.82464
6168	BC063476	RPL37A	219	3.08917	2.28614	2	3.08917
54913	BC007270	RPP25	600	2.66305	3.19779	2	3.19779
6187	BC032129	RPS2	882	3.02748	3.92057	2	3.92057
6189	BC066926	RPS3A	795	3.23661	1.84016	2	3.23661
6194	BC027620	RPS6	750	2.99058	2.09873	2	2.99058
204010	BC058822	RPSAP52	594	7.80954	0	1	7.80954
29115	BC007592	SAP30BP	927	7.03606	3.07159	2	7.03606
6304	BC001744	SATB1	2292	8.16087	0	1	8.16087
10590	BC000336	SCGN	831	3.42246	4.29166	2	4.29166
51540	BC007891	SCLY	1338	4.65764	6.43797	2	6.43797
6389	BC041016	SDHA	1560	4.87578	6.97379	2	6.97379
135154	BC018085	SDHAF4	327	0	6.35544	1	6.35544
55176	BC026179	SEC61A2	1257	7.69516	0	1	7.69516
7979	BC032782	SEM1	213	0	7.25908	1	7.25908
866	BC058021	SERPINA6	1218	6.1297	0	1	6.1297
6317	BC005224	SERPINB3	1173	7.10999	0	1	7.10999
5268	BC020713	SERPINB5	696	7.01236	0	1	7.01236
400120	BC036540	SERTM1	324	7.71713	0	1	7.71713
6446	BC001263	SGK1	1296	6.52074	0	1	6.52074
113829	BC009906	SLC35A4	975	2.07046	2.34577	2	2.34577
115584	BC057780	SLC5A11	1836	6.04352	0	1	6.04352
10479	BC049169	SLC9A6	2106	3.15389	5.5472	2	5.5472
150159	BC022079	SLC9B1	657	6.05961	0	1	6.05961
4086	BC001878	SMAD1	1398	3.35896	2.60774	2	3.35896
4089	BC002379	SMAD4	1659	8.56712	0	1	8.56712
56935	BC031564	SMCO4	180	3.90176	2.04513	2	3.90176
6619	BC036031	SNAPC3	762	2.18706	3.82504	2	3.82504
128439	BC040237	SNHG11	252	7.25229	0	1	7.25229
50854	BC017660	SNHG32	228	1.59928	1.89853	2	1.89853
8724	BC015179	SNX3	489	4.53985	3.61536	2	4.53985
29886	BC021565	SNX8	1398	7.31759	0	1	7.31759
6668	BC016680	SP2	1821	7.04636	0	1	7.04636
130560	BC047704	SPATA3	552	3.46546	2.47627	2	3.46546
6720	BC057388	SREBF1	3444	7.14241	0	1	7.14241
6727	BC035495	SRP14	411	3.38513	2.1023	2	3.38513
6778	BC075852	STAT6	2544	2.08685	6.96301	2	6.96301
9262	BC016040	STK17B	1119	0	7.86802	1	7.86802
50861	BC009381	STMN3	543	6.75435	0	1	6.75435
6809	BC007405	STX3	870	0	7.88533	1	7.88533
6815	BC020265	STYX	672	8.54411	0	1	8.54411
374969	BC029427	SVBP	201	2.75715	2.68155	2	2.75715
79953	BC030637	SYNDIG1	777	7.50367	0	1	7.50367
6857	BC058917	SYT1	1269	1.91412	1.824	2	1.91412
10474	BC013433	TADA3	1299	3.84662	2.18963	2	3.84662
6879	BC032737	TAF7	1050	7.478	0	1	7.478
129685	BC033728	TAF8	525	6.06178	0	1	6.06178
117289	BC015859	TAGAP	801	4.0191	1.55585	2	4.0191
6888	BC009680	TALDO1	957	6.23322	0	1	6.23322
1155	BC005969	TBCB	735	8.3334	4.5167	2	8.3334
6941	BC002493	TCF19	1038	5.15462	3.84764	2	5.15462
202500	BC035022	TCTE1	1506	3.85293	2.64063	2	3.85293
26123	BC068449	TCTN3	1824	7.75529	0	1	7.75529
7004	BC015497	TEAD4	1086	8.1532	0	1	8.1532
121793	BC029889	TEX29	456	7.26341	0	1	7.26341
7020	BC017754	TFAP2A	1296	6.08874	0	1	6.08874
7023	BC010576	TFAP4	1017	7.08513	0	1	7.08513
7029	BC021113	TFDP2	1161	3.4284	2.23537	2	3.4284
10342	BC001483	TFG	1203	0	7.86357	1	7.86357
60436	BC006549	TGIF2	714	8.06167	0	1	8.06167
79178	BC002984	THTPA	693	2.14088	3.31383	2	3.31383
7088	BC010100	TLE1	2313	6.3505	0	1	6.3505
30012	BC017291	TLX3	876	3.33665	3.25232	2	3.33665
4071	BC034145	TM4SF1	699	4.34997	2.14595	2	4.34997
89894	BC070135	TMEM116	738	4.72749	2.14941	2	4.72749
55863	BC038933	TMEM126B	603	8.08555	7.13443	2	8.08555
84548	BC022405	TMEM185A	273	1.71746	1.94281	2	1.94281
130612	BC080573	TMEM198	1083	4.51011	3.73705	2	4.51011
7135	BC012601	TNNI1	564	6.27479	2.08781	2	6.27479
7168	BC007433	TPM1	855	2.48304	6.20477	2	6.20477
7172	BC009596	TPMT	738	7.45418	0	1	7.45418
10626	BC053514	TRIM16	1695	6.83592	0	1	6.83592
11074	BC017017	TRIM31	1278	2.47755	2.63573	2	2.63573
54765	BC013166	TRIM44	1035	6.68566	0	1	6.68566
54902	BC011698	TTC19	822	5.66977	4.09417	2	5.66977
55020	BC018918	TTC38	1410	0	6.35544	1	6.35544
123016	BC026351	TTC8	1596	0	8.71184	1	8.71184
83887	BC030650	TTLL2	1779	0	7.97911	1	7.97911
284076	BC033563	TTLL6	1710	7.26124	0	1	7.26124
55000	BC037986	TUG1	408	0	6.49134	1	6.49134
54957	BC009646	TXNL4B	450	6.57225	7.23529	2	7.23529
9898	BC003170	UBAP2L	3264	7.39163	0	1	7.39163
55585	BC015316	UBE2Q1	216	2.10761	4.60282	2	4.60282
55850	BC008455	USE1	780	1.99861	1.55553	2	1.99861
10083	BC016057	USH1C	1602	0	8.24546	1	8.24546
80146	BC009819	UXS1	1263	6.60353	0	1	6.60353
57687	BC033537	VAT1L	1260	6.87357	1.97528	2	6.87357
353513	BC056508	VCY1B	378	3.25078	3.18229	2	3.25078
23559	BC010012	WBP1	810	2.19859	2.64162	2	2.64162
55093	BC008781	WDYHV1	618	6.89045	0	1	6.89045
25937	BC014052	WWTR1	1203	6.26941	0	1	6.26941
113763	BC011406	ZBED6CL	711	7.0492	2.92266	2	7.0492
84240	BC032736	ZCCHC9	816	3.35536	2.28279	2	3.35536
85437	BC022543	ZCRB1	654	7.8874	0	1	7.8874
55734	BC012759	ZFP64	2046	7.03474	0	1	7.03474
84619	BC032612	ZGPAT	1536	1.64446	1.79331	2	1.79331
83637	BC021924	ZMIZ2	1329	0	6.59246	1	6.59246
9203	BC069057	ZMYM3	4113	4.41315	4.6109	2	4.6109
7692	BC001887	ZNF133	1962	8.51515	0	1	8.51515
7728	BC052997	ZNF175	2136	6.8166	0	1	6.8166
7752	BC012909	ZNF200	1188	8.19308	0	1	8.19308
7760	BC007287	ZNF213	1380	6.85972	0	1	6.85972
7767	BC051902	ZNF224	2124	7.09592	4.45867	2	7.09592
129025	BC053901	ZNF280A	1629	9.0018	0	1	9.0018
162979	BC019352	ZNF296	1428	6.45385	0	1	6.45385
55900	BC024176	ZNF302	1200	6.47671	0	1	6.47671
84449	BC048107	ZNF333	912	0	7.64299	1	7.64299
59348	BC009921	ZNF350	1599	7.31034	0	1	7.31034
57541	BC043295	ZNF398	1929	5.90304	3.30804	2	5.90304
55659	BC000130	ZNF416	1785	0	6.25285	1	6.25285
79088	BC001791	ZNF426	1665	6.68089	0	1	6.68089
162655	BC024227	ZNF519	1623	7.42828	0	1	7.42828
147807	BC014666	ZNF524	795	2.82167	2.23077	2	2.82167
84527	BC006436	ZNF559	1617	7.07852	0	1	7.07852
51042	BC002580	ZNF593	351	0	6.37689	1	6.37689
80110	BC004930	ZNF614	597	8.8242	0	1	8.8242
58491	BC014280	ZNF71	1470	7.26916	0	1	7.26916
7627	BC051366	ZNF75A	462	6.36212	0	1	6.36212
79724	BC013760	ZNF768	1563	6.97751	0	1	6.97751
146540	BC040642	ZNF785	1218	4.74019	5.87578	2	5.87578
7633	BC062309	ZNF79	1497	6.30012	0	1	6.30012
7554	BC039323	ZNF8	1728	6.40327	0	1	6.40327
388558	BC017109	ZNF808	228	6.38198	0	1	6.38198
55778	BC006222	ZNF839	426	7.73295	2.89219	2	7.73295
168374	BC040594	ZNF92	1761	7.26303	0	1	7.26303
130619	BC031585		492	6.7926	0	1	6.7926
244	BC008813		831	6.3147	0	1	6.3147
