# Supplementary material for: A Live Cell Protein Complementation Assay for ORFeome-Wide Probing of Human HOX Interactomes
Source: Cells. 2023 Jan 3;12(1):200. doi: 10.3390/cells12010200 (PMC9818449; doi:10.3390/cells12010200)
Supplement: Supplementary file 1 [file cells-12-00200-s001.zip › Table S8.xlsx]

## Sheet: Table_Gene_ORF_Blast
Supplementary Table S8. hORFs identified with the first 50bp (with up to 3 bp differences) upon BLASTN with the hORFeome v3.1.
References			BLAST results for 50bps allowing 3 differences
ID_ORF_Gene	Gene	ORF	Number of BLAST match(s)	Identify the following ID_ORF_Gene(s)	Identify the following Gene(s)
35673_BC012161	35673	BC012161	1	35673_BC012161	35673
36038_BC014455	36038	BC014455	2	36038_BC014455,36038_BC033559	36038
36038_BC033559	36038	BC033559	2	36038_BC014455,36038_BC033559	36038
37134_BC025261	37134	BC025261	1	37134_BC025261	37134
37499_BC009291	37499	BC009291	3	37499_BC009291,37499_BC011922,37499_BC036240	37499
37499_BC011922	37499	BC011922	3	37499_BC009291,37499_BC011922,37499_BC036240	37499
37499_BC036240	37499	BC036240	3	37499_BC009291,37499_BC011922,37499_BC036240	37499
38230_BC001329	38230	BC001329	1	38230_BC001329	38230
38595_BC021192	38595	BC021192	1	38595_BC021192	38595
38960_BC020502	38960	BC020502	1	38960_BC020502	38960
40786_BC005294	40786	BC005294	1	40786_BC005294	40786
40786_BC021697	40786	BC021697	1	40786_BC021697	40786
A1BG_BC035719	A1BG	BC035719	1	A1BG_BC035719	A1BG
A4GALT_BC017068	A4GALT	BC017068	1	A4GALT_BC017068	A4GALT
AAAS_BC000659	AAAS	BC000659	1	AAAS_BC000659	AAAS
AACS_BC051862	AACS	BC051862	1	AACS_BC051862	AACS
AADAC_BC032309	AADAC	BC032309	1	AADAC_BC032309	AADAC
AADACL1_BC028734	AADACL1	BC028734	1	AADACL1_BC028734	AADACL1
AADACL2_BC065724	AADACL2	BC065724	1	AADACL2_BC065724	AADACL2
AADAT_BC031068	AADAT	BC031068	1	AADAT_BC031068	AADAT
AAK1_BC002695	AAK1	BC002695	1	AAK1_BC002695	AAK1
AAMP_BC014122	AAMP	BC014122	1	AAMP_BC014122	AAMP
AANAT_BC069434	AANAT	BC069434	1	AANAT_BC069434	AANAT
AASDH_BC015096	AASDH	BC015096	1	AASDH_BC015096	AASDH
AASDHPPT_BC015470	AASDHPPT	BC015470	2	AASDHPPT_BC015470,AASDHPPT_BC016728	AASDHPPT
AASDHPPT_BC016728	AASDHPPT	BC016728	2	AASDHPPT_BC015470,AASDHPPT_BC016728	AASDHPPT
AATF_BC000591	AATF	BC000591	1	AATF_BC000591	AATF
ABAT_BC008990	ABAT	BC008990	1	ABAT_BC008990	ABAT
ABAT_BC015628	ABAT	BC015628	2	ABAT_BC015628,ABAT_BC031413	ABAT
ABAT_BC031413	ABAT	BC031413	2	ABAT_BC015628,ABAT_BC031413	ABAT
ABCA3_BC062779	ABCA3	BC062779	1	ABCA3_BC062779	ABCA3
ABCA8_BC047765	ABCA8	BC047765	1	ABCA8_BC047765	ABCA8
ABCA9_BC062472	ABCA9	BC062472	1	ABCA9_BC062472	ABCA9
ABCB6_BC000559	ABCB6	BC000559	1	ABCB6_BC000559	ABCB6
ABCB7_BC006323	ABCB7	BC006323	1	ABCB7_BC006323	ABCB7
ABCB9_BC017348	ABCB9	BC017348	1	ABCB9_BC017348	ABCB9
ABCC11_BC039085	ABCC11	BC039085	1	ABCC11_BC039085	ABCC11
ABCC4_BC041560	ABCC4	BC041560	1	ABCC4_BC041560	ABCC4
ABCC9_BC033804	ABCC9	BC033804	1	ABCC9_BC033804	ABCC9
ABCD3_BC009712	ABCD3	BC009712	2	ABCD3_BC009712,ABCD3_BC068509	ABCD3
ABCD3_BC068509	ABCD3	BC068509	2	ABCD3_BC009712,ABCD3_BC068509	ABCD3
ABCE1_BC016283	ABCE1	BC016283	1	ABCE1_BC016283	ABCE1
ABCF1_BC034488	ABCF1	BC034488	1	ABCF1_BC034488	ABCF1
ABCF2_BC001661	ABCF2	BC001661	1	ABCF2_BC001661	ABCF2
ABCF3_BC009253	ABCF3	BC009253	2	ABCF3_BC009253,ABCF3_BC051754	ABCF3
ABCF3_BC051754	ABCF3	BC051754	2	ABCF3_BC009253,ABCF3_BC051754	ABCF3
ABCG4_BC041091	ABCG4	BC041091	1	ABCG4_BC041091	ABCG4
ABHD10_BC014516	ABHD10	BC014516	1	ABHD10_BC014516	ABHD10
ABHD11_BC008251	ABHD11	BC008251	1	ABHD11_BC008251	ABHD11
ABHD14A_BC002571	ABHD14A	BC002571	1	ABHD14A_BC002571	ABHD14A
ABHD1_BC039576	ABHD1	BC039576	1	ABHD1_BC039576	ABHD1
ABHD2_BC019248	ABHD2	BC019248	1	ABHD2_BC019248	ABHD2
ABHD3_BC021196	ABHD3	BC021196	1	ABHD3_BC021196	ABHD3
ABHD5_BC021958	ABHD5	BC021958	1	ABHD5_BC021958	ABHD5
ABHD7_BC041475	ABHD7	BC041475	1	ABHD7_BC041475	ABHD7
ABI2_BC001439	ABI2	BC001439	1	ABI2_BC001439	ABI2
ABI3_BC007780	ABI3	BC007780	1	ABI3_BC007780	ABI3
ABI3BP_BC030221	ABI3BP	BC030221	1	ABI3BP_BC030221	ABI3BP
ABLIM1_BC002448	ABLIM1	BC002448	1	ABLIM1_BC002448	ABLIM1
ABLIM3_BC001665	ABLIM3	BC001665	1	ABLIM3_BC001665	ABLIM3
ABO_BC069595	ABO	BC069595	1	ABO_BC069595	ABO
ABP1_BC014093	ABP1	BC014093	1	ABP1_BC014093	ABP1
ABT1_BC048812	ABT1	BC048812	2	ABT1_BC048812,ABT1_BC066313	ABT1
ABT1_BC066313	ABT1	BC066313	2	ABT1_BC048812,ABT1_BC066313	ABT1
ABTB1_BC011858	ABTB1	BC011858	1	ABTB1_BC011858	ABTB1
ACAA1_BC011977	ACAA1	BC011977	2	ACAA1_BC011977,ACAA1_BC014474	ACAA1
ACAA1_BC014474	ACAA1	BC014474	2	ACAA1_BC011977,ACAA1_BC014474	ACAA1
ACAA2_BC001918	ACAA2	BC001918	1	ACAA2_BC001918	ACAA2
ACAD10_BC015056	ACAD10	BC015056	1	ACAD10_BC015056	ACAD10
ACAD8_BC001964	ACAD8	BC001964	1	ACAD8_BC001964	ACAD8
ACAD9_BC007970	ACAD9	BC007970	2	ACAD9_BC007970,ACAD9_BC013354	ACAD9
ACAD9_BC013354	ACAD9	BC013354	2	ACAD9_BC007970,ACAD9_BC013354	ACAD9
ACADL_BC039063	ACADL	BC039063	1	ACADL_BC039063	ACADL
ACADM_BC005377	ACADM	BC005377	1	ACADM_BC005377	ACADM
ACADSB_BC013756	ACADSB	BC013756	1	ACADSB_BC013756	ACADSB
ACADS_BC025963	ACADS	BC025963	1	ACADS_BC025963	ACADS
ACAT1_BC010942	ACAT1	BC010942	1	ACAT1_BC010942	ACAT1
ACAT2_BC000408	ACAT2	BC000408	1	ACAT2_BC000408	ACAT2
ACBD4_BC029164	ACBD4	BC029164	2	ACBD4_BC029164,ACBD4_BC041143	ACBD4
ACBD4_BC041143	ACBD4	BC041143	2	ACBD4_BC029164,ACBD4_BC041143	ACBD4
ACBD5_BC030555	ACBD5	BC030555	1	ACBD5_BC030555	ACBD5
ACBD7_BC029526	ACBD7	BC029526	1	ACBD7_BC029526	ACBD7
ACCN4_BC010439	ACCN4	BC010439	2	ACCN4_BC010439,ACCN4_BC031812	ACCN4
ACCN4_BC031812	ACCN4	BC031812	2	ACCN4_BC010439,ACCN4_BC031812	ACCN4
ACCN4_BC073912	ACCN4	BC073912	1	ACCN4_BC073912	ACCN4
ACD_BC016904	ACD	BC016904	1	ACD_BC016904	ACD
ACF_BC054873	ACF	BC054873	1	ACF_BC054873	ACF
ACLY_BC006195	ACLY	BC006195	1	ACLY_BC006195	ACLY
ACMSD_BC016018	ACMSD	BC016018	1	ACMSD_BC016018	ACMSD
ACOT11_BC001517	ACOT11	BC001517	1	ACOT11_BC001517	ACOT11
ACOT2_BC004436	ACOT2	BC004436	1	ACOT2_BC004436	ACOT2
ACOT4_BC031799	ACOT4	BC031799	1	ACOT4_BC031799	ACOT4
ACOT7_BC017365	ACOT7	BC017365	1	ACOT7_BC017365	ACOT7
ACOT9_BC012573	ACOT9	BC012573	1	ACOT9_BC012573	ACOT9
ACOX1_BC010425	ACOX1	BC010425	1	ACOX1_BC010425	ACOX1
ACOX2_BC047700	ACOX2	BC047700	1	ACOX2_BC047700	ACOX2
ACOX3_BC017053	ACOX3	BC017053	1	ACOX3_BC017053	ACOX3
ACP1_BC007422	ACP1	BC007422	2	ACP1_BC007422,ACP1_BC020699	ACP1
ACP1_BC020699	ACP1	BC020699	2	ACP1_BC007422,ACP1_BC020699	ACP1
ACP5_BC025414	ACP5	BC025414	1	ACP5_BC025414	ACP5
ACP6_BC009965	ACP6	BC009965	2	ACP6_BC009965,ACP6_BC034686	ACP6
ACP6_BC034686	ACP6	BC034686	2	ACP6_BC009965,ACP6_BC034686	ACP6
ACPP_BC008493	ACPP	BC008493	2	ACPP_BC008493,ACPP_BC016344	ACPP
ACPP_BC016344	ACPP	BC016344	2	ACPP_BC008493,ACPP_BC016344	ACPP
ACRV1_BC014588	ACRV1	BC014588	1	ACRV1_BC014588	ACRV1
ACSBG1_BC009289	ACSBG1	BC009289	1	ACSBG1_BC009289	ACSBG1
ACSBG2_BC022027	ACSBG2	BC022027	1	ACSBG2_BC022027	ACSBG2
ACSL1_BC050073	ACSL1	BC050073	1	ACSL1_BC050073	ACSL1
ACSL4_BC034959	ACSL4	BC034959	1	ACSL4_BC034959	ACSL4
ACSL5_BC007985	ACSL5	BC007985	1	ACSL5_BC007985	ACSL5
ACSL6_BC047453	ACSL6	BC047453	1	ACSL6_BC047453	ACSL6
ACSM3_BC002790	ACSM3	BC002790	1	ACSM3_BC002790	ACSM3
ACSS1_BC039261	ACSS1	BC039261	1	ACSS1_BC039261	ACSS1
ACSS2_BC012172	ACSS2	BC012172	1	ACSS2_BC012172	ACSS2
ACTA1_BC012597	ACTA1	BC012597	1	ACTA1_BC012597	ACTA1
ACTA2_BC017554	ACTA2	BC017554	1	ACTA2_BC017554	ACTA2
ACTB_BC001301	ACTB	BC001301	2	ACTB_BC001301,ACTB_BC016045	ACTB
ACTB_BC012854	ACTB	BC012854	1	ACTB_BC012854	ACTB
ACTB_BC016045	ACTB	BC016045	2	ACTB_BC001301,ACTB_BC016045	ACTB
ACTC_BC009978	ACTC	BC009978	1	ACTC_BC009978	ACTC
ACTG1_BC012050	ACTG1	BC012050	3	ACTG1_BC012050,ACTG1_BC015779,ACTG1_BC018774	ACTG1
ACTG1_BC015779	ACTG1	BC015779	3	ACTG1_BC012050,ACTG1_BC015779,ACTG1_BC018774	ACTG1
ACTG1_BC018774	ACTG1	BC018774	3	ACTG1_BC012050,ACTG1_BC015779,ACTG1_BC018774	ACTG1
ACTG2_BC012617	ACTG2	BC012617	1	ACTG2_BC012617	ACTG2
ACTL6A_BC001391	ACTL6A	BC001391	2	ACTL6A_BC001391,ACTL6A_BC036371	ACTL6A
ACTL6A_BC036371	ACTL6A	BC036371	2	ACTL6A_BC001391,ACTL6A_BC036371	ACTL6A
ACTL6B_BC020944	ACTL6B	BC020944	1	ACTL6B_BC020944	ACTL6B
ACTL7A_BC014610	ACTL7A	BC014610	1	ACTL7A_BC014610	ACTL7A
ACTL7B_BC033789	ACTL7B	BC033789	1	ACTL7B_BC033789	ACTL7B
ACTL8_BC028909	ACTL8	BC028909	1	ACTL8_BC028909	ACTL8
ACTN1_BC003576	ACTN1	BC003576	1	ACTN1_BC003576	ACTN1
ACTN2_BC051770	ACTN2	BC051770	1	ACTN2_BC051770	ACTN2
ACTN4_BC005033	ACTN4	BC005033	1	ACTN4_BC005033	ACTN4
ACTR10_BC011997	ACTR10	BC011997	1	ACTR10_BC011997	ACTR10
ACTR1A_BC000693	ACTR1A	BC000693	1	ACTR1A_BC000693	ACTR1A
ACTR1B_BC004374	ACTR1B	BC004374	2	ACTR1B_BC004374,ACTR1B_BC006372	ACTR1B
ACTR1B_BC006372	ACTR1B	BC006372	2	ACTR1B_BC004374,ACTR1B_BC006372	ACTR1B
ACTR2_BC014546	ACTR2	BC014546	1	ACTR2_BC014546	ACTR2
ACTR3B_BC008682	ACTR3B	BC008682	2	ACTR3B_BC008682,ACTR3B_BC015207	ACTR3B
ACTR3B_BC015207	ACTR3B	BC015207	2	ACTR3B_BC008682,ACTR3B_BC015207	ACTR3B
ACTR3_BC044590	ACTR3	BC044590	1	ACTR3_BC044590	ACTR3
ACTR6_BC015107	ACTR6	BC015107	1	ACTR6_BC015107	ACTR6
ACTR8_BC032744	ACTR8	BC032744	1	ACTR8_BC032744	ACTR8
ACVR1B_BC000254	ACVR1B	BC000254	1	ACVR1B_BC000254	ACVR1B
ACVR1_BC033867	ACVR1	BC033867	1	ACVR1_BC033867	ACVR1
ACVR1C_BC022530	ACVR1C	BC022530	1	ACVR1C_BC022530	ACVR1C
ACVR2A_BC067418	ACVR2A	BC067418	2	ACVR2A_BC067418,ACVR2A_BC069707	ACVR2A
ACVR2A_BC069707	ACVR2A	BC069707	2	ACVR2A_BC067418,ACVR2A_BC069707	ACVR2A
ACVRL1_BC042637	ACVRL1	BC042637	1	ACVRL1_BC042637	ACVRL1
ACY1_BC003023	ACY1	BC003023	1	ACY1_BC003023	ACY1
ACY3_BC008689	ACY3	BC008689	1	ACY3_BC008689	ACY3
ACYP1_BC035568	ACYP1	BC035568	1	ACYP1_BC035568	ACYP1
ACYP2_BC012290	ACYP2	BC012290	1	ACYP2_BC012290	ACYP2
AD-003_BC001396	AD-003	BC001396	1	AD-003_BC001396	AD-003
AD023_BC033759	AD023	BC033759	1	AD023_BC033759	AD023
ADA_BC007678	ADA	BC007678	1	ADA_BC007678	ADA
ADAM15_BC014566	ADAM15	BC014566	1	ADAM15_BC014566	ADAM15
ADAM17_BC062687	ADAM17	BC062687	1	ADAM17_BC062687	ADAM17
ADAM18_BC070279	ADAM18	BC070279	1	ADAM18_BC070279	ADAM18
ADAM20_BC025378	ADAM20	BC025378	1	ADAM20_BC025378	ADAM20
ADAM22_BC036029	ADAM22	BC036029	1	ADAM22_BC036029	ADAM22
ADAM2_BC034957	ADAM2	BC034957	2	ADAM2_BC034957,ADAM2_BC064547	ADAM2
ADAM2_BC064547	ADAM2	BC064547	2	ADAM2_BC034957,ADAM2_BC064547	ADAM2
ADAM30_BC028372	ADAM30	BC028372	1	ADAM30_BC028372	ADAM30
ADAM32_BC026085	ADAM32	BC026085	2	ADAM32_BC026085,ADAM32_BC030014	ADAM32
ADAM32_BC030014	ADAM32	BC030014	2	ADAM32_BC026085,ADAM32_BC030014	ADAM32
ADAM33_BC062663	ADAM33	BC062663	1	ADAM33_BC062663	ADAM33
ADAM7_BC058037	ADAM7	BC058037	1	ADAM7_BC058037	ADAM7
ADAMDEC1_BC069582	ADAMDEC1	BC069582	1	ADAMDEC1_BC069582	ADAMDEC1
ADAMTS12_BC058841	ADAMTS12	BC058841	1	ADAMTS12_BC058841	ADAMTS12
ADAMTS18_BC063283	ADAMTS18	BC063283	1	ADAMTS18_BC063283	ADAMTS18
ADAMTS1_BC036515	ADAMTS1	BC036515	1	ADAMTS1_BC036515	ADAMTS1
ADAMTS4_BC030812	ADAMTS4	BC030812	1	ADAMTS4_BC030812	ADAMTS4
ADAMTSL1_BC030262	ADAMTSL1	BC030262	1	ADAMTSL1_BC030262	ADAMTSL1
ADAMTSL2_BC050544	ADAMTSL2	BC050544	1	ADAMTSL2_BC050544	ADAMTSL2
ADAT1_BC002758	ADAT1	BC002758	1	ADAT1_BC002758	ADAT1
ADC_BC010449	ADC	BC010449	1	ADC_BC010449	ADC
ADCK1_BC058906	ADCK1	BC058906	1	ADCK1_BC058906	ADCK1
ADCK2_BC014107	ADCK2	BC014107	1	ADCK2_BC014107	ADCK2
ADCK4_BC013114	ADCK4	BC013114	2	ADCK4_BC013114,ADCK4_BC027473	ADCK4
ADCK4_BC027473	ADCK4	BC027473	2	ADCK4_BC013114,ADCK4_BC027473	ADCK4
ADCK5_BC031570	ADCK5	BC031570	1	ADCK5_BC031570	ADCK5
ADD1_BC013393	ADD1	BC013393	1	ADD1_BC013393	ADD1
ADD3_BC062559	ADD3	BC062559	1	ADD3_BC062559	ADD3
ADFP_BC005127	ADFP	BC005127	1	ADFP_BC005127	ADFP
ADH1C_BC066228	ADH1C	BC066228	1	ADH1C_BC066228	ADH1C
ADH4_BC022319	ADH4	BC022319	1	ADH4_BC022319	ADH4
ADH5_BC014665	ADH5	BC014665	1	ADH5_BC014665	ADH5
ADIPOR1_BC010743	ADIPOR1	BC010743	1	ADIPOR1_BC010743	ADIPOR1
ADIPOR2_BC051858	ADIPOR2	BC051858	1	ADIPOR2_BC051858	ADIPOR2
ADK_BC003568	ADK	BC003568	1	ADK_BC003568	ADK
ADMR_BC034761	ADMR	BC034761	1	ADMR_BC034761	ADMR
ADNP_BC075794	ADNP	BC075794	1	ADNP_BC075794	ADNP
ADORA1_BC026340	ADORA1	BC026340	1	ADORA1_BC026340	ADORA1
ADORA2A_BC013780	ADORA2A	BC013780	1	ADORA2A_BC013780	ADORA2A
ADORA2B_BC025722	ADORA2B	BC025722	1	ADORA2B_BC025722	ADORA2B
ADORA3_BC029831	ADORA3	BC029831	1	ADORA3_BC029831	ADORA3
ADORA3_BC041707	ADORA3	BC041707	1	ADORA3_BC041707	ADORA3
ADPGK_BC006112	ADPGK	BC006112	1	ADPGK_BC006112	ADPGK
ADPN_BC014449	ADPN	BC014449	1	ADPN_BC014449	ADPN
ADPN_BC065195	ADPN	BC065195	1	ADPN_BC065195	ADPN
ADPRH_BC063883	ADPRH	BC063883	1	ADPRH_BC063883	ADPRH
ADPRHL1_BC009755	ADPRHL1	BC009755	1	ADPRHL1_BC009755	ADPRHL1
ADRB2_BC073856	ADRB2	BC073856	1	ADRB2_BC073856	ADRB2
ADRBK1_BC037963	ADRBK1	BC037963	1	ADRBK1_BC037963	ADRBK1
ADRBK2_BC036797	ADRBK2	BC036797	1	ADRBK2_BC036797	ADRBK2
ADRM1_BC017245	ADRM1	BC017245	1	ADRM1_BC017245	ADRM1
ADSL_BC000253	ADSL	BC000253	1	ADSL_BC000253	ADSL
ADSS_BC012356	ADSS	BC012356	1	ADSS_BC012356	ADSS
ADSSL1_BC047904	ADSSL1	BC047904	1	ADSSL1_BC047904	ADSSL1
AE2_BC024011	AE2	BC024011	1	AE2_BC024011	AE2
AEBP2_BC022220	AEBP2	BC022220	1	AEBP2_BC022220	AEBP2
AER61_BC028935	AER61	BC028935	1	AER61_BC028935	AER61
AER61_BC060887	AER61	BC060887	1	AER61_BC060887	AER61
AFAP_BC032777	AFAP	BC032777	1	AFAP_BC032777	AFAP
AFF4_BC025700	AFF4	BC025700	2	AFF4_BC025700,AFF4_BC063007	AFF4
AFF4_BC063007	AFF4	BC063007	2	AFF4_BC025700,AFF4_BC063007	AFF4
AFG3L1_BC021245	AFG3L1	BC021245	1	AFG3L1_BC021245	AFG3L1
AFTIPHILIN_BC022247	AFTIPHILIN	BC022247	1	AFTIPHILIN_BC022247	AFTIPHILIN
AGA_BC012392	AGA	BC012392	1	AGA_BC012392	AGA
AGBL2_BC028200	AGBL2	BC028200	1	AGBL2_BC028200	AGBL2
AGBL3_BC030651	AGBL3	BC030651	1	AGBL3_BC030651	AGBL3
AGER_BC020669	AGER	BC020669	1	AGER_BC020669	AGER
AGGF1_BC002828	AGGF1	BC002828	2	AGGF1_BC002828,AGGF1_BC032844	AGGF1
AGGF1_BC032844	AGGF1	BC032844	2	AGGF1_BC002828,AGGF1_BC032844	AGGF1
AGMAT_BC005090	AGMAT	BC005090	1	AGMAT_BC005090	AGMAT
AGO61_BC021220	AGO61	BC021220	1	AGO61_BC021220	AGO61
AGO61_BC060861	AGO61	BC060861	1	AGO61_BC060861	AGO61
AGPAT1_BC002402	AGPAT1	BC002402	1	AGPAT1_BC002402	AGPAT1
AGPAT1_BC006818	AGPAT1	BC006818	1	AGPAT1_BC006818	AGPAT1
AGPAT2_BC000026	AGPAT2	BC000026	3	AGPAT2_BC000026,AGPAT2_BC004529,AGPAT2_BC019292	AGPAT2
AGPAT2_BC004529	AGPAT2	BC004529	3	AGPAT2_BC000026,AGPAT2_BC004529,AGPAT2_BC019292	AGPAT2
AGPAT2_BC019292	AGPAT2	BC019292	3	AGPAT2_BC000026,AGPAT2_BC004529,AGPAT2_BC019292	AGPAT2
AGPAT3_BC004219	AGPAT3	BC004219	1	AGPAT3_BC004219	AGPAT3
AGPAT3_BC011971	AGPAT3	BC011971	2	AGPAT3_BC011971,AGPAT3_BC063552	AGPAT3
AGPAT3_BC063552	AGPAT3	BC063552	2	AGPAT3_BC011971,AGPAT3_BC063552	AGPAT3
AGPAT4_BC020209	AGPAT4	BC020209	1	AGPAT4_BC020209	AGPAT4
AGPAT5_BC023550	AGPAT5	BC023550	1	AGPAT5_BC023550	AGPAT5
AGPAT6_BC051377	AGPAT6	BC051377	1	AGPAT6_BC051377	AGPAT6
AGR2_BC015503	AGR2	BC015503	1	AGR2_BC015503	AGR2
AGT_BC011519	AGT	BC011519	1	AGT_BC011519	AGT
AGTPBP1_BC060815	AGTPBP1	BC060815	1	AGTPBP1_BC060815	AGTPBP1
AGTR1_BC022447	AGTR1	BC022447	2	AGTR1_BC022447,AGTR1_BC068494	AGTR1
AGTR1_BC068494	AGTR1	BC068494	2	AGTR1_BC022447,AGTR1_BC068494	AGTR1
AGTRAP_BC017328	AGTRAP	BC017328	1	AGTRAP_BC017328	AGTRAP
AGTRL1_BC032688	AGTRL1	BC032688	1	AGTRL1_BC032688	AGTRL1
AGXT2L1_BC022526	AGXT2L1	BC022526	1	AGXT2L1_BC022526	AGXT2L1
AHCY_BC011606	AHCY	BC011606	1	AHCY_BC011606	AHCY
AHCYL1_BC007576	AHCYL1	BC007576	1	AHCYL1_BC007576	AHCYL1
AHDC1_BC014394	AHDC1	BC014394	1	AHDC1_BC014394	AHDC1
AHNAK_BC000926	AHNAK	BC000926	1	AHNAK_BC000926	AHNAK
AHNAK_BC012477	AHNAK	BC012477	1	AHNAK_BC012477	AHNAK
AHR_BC069390	AHR	BC069390	1	AHR_BC069390	AHR
AHSA1_BC000321	AHSA1	BC000321	1	AHSA1_BC000321	AHSA1
AHSG_BC052590	AHSG	BC052590	1	AHSG_BC052590	AHSG
AICDA_BC006296	AICDA	BC006296	1	AICDA_BC006296	AICDA
AIF1_BC009474	AIF1	BC009474	1	AIF1_BC009474	AIF1
AIFL_BC032485	AIFL	BC032485	1	AIFL_BC032485	AIFL
AIG1_BC025278	AIG1	BC025278	1	AIG1_BC025278	AIG1
AIM2_BC010940	AIM2	BC010940	1	AIM2_BC010940	AIM2
AIPL1_BC012055	AIPL1	BC012055	1	AIPL1_BC012055	AIPL1
AK1_BC001116	AK1	BC001116	1	AK1_BC001116	AK1
AK2_BC009405	AK2	BC009405	1	AK2_BC009405	AK2
AK3_BC013771	AK3	BC013771	1	AK3_BC013771	AK3
AK3L1_BC016180	AK3L1	BC016180	3	AK3L1_BC016180,AK3L1_BC040224,AK3L1_BC066944	AK3L1
AK3L1_BC040224	AK3L1	BC040224	3	AK3L1_BC016180,AK3L1_BC040224,AK3L1_BC066944	AK3L1
AK3L1_BC066944	AK3L1	BC066944	3	AK3L1_BC016180,AK3L1_BC040224,AK3L1_BC066944	AK3L1
AK7_BC035256	AK7	BC035256	1	AK7_BC035256	AK7
AKAP10_BC017055	AKAP10	BC017055	1	AKAP10_BC017055	AKAP10
AKAP13_BC050312	AKAP13	BC050312	1	AKAP13_BC050312	AKAP13
AKAP3_BC047535	AKAP3	BC047535	1	AKAP3_BC047535	AKAP3
AKAP7_BC016927	AKAP7	BC016927	1	AKAP7_BC016927	AKAP7
AKAP8_BC037270	AKAP8	BC037270	1	AKAP8_BC037270	AKAP8
AKAP8L_BC000713	AKAP8L	BC000713	1	AKAP8L_BC000713	AKAP8L
AKAP9_BC015533	AKAP9	BC015533	1	AKAP9_BC015533	AKAP9
AKR1A1_BC000670	AKR1A1	BC000670	2	AKR1A1_BC000670,AKR1A1_BC005394	AKR1A1
AKR1A1_BC005394	AKR1A1	BC005394	2	AKR1A1_BC000670,AKR1A1_BC005394	AKR1A1
AKR1B10_BC008837	AKR1B10	BC008837	1	AKR1B10_BC008837	AKR1B10
AKR1B1_BC000260	AKR1B1	BC000260	2	AKR1B1_BC000260,AKR1B1_BC005387	AKR1B1
AKR1B1_BC005387	AKR1B1	BC005387	2	AKR1B1_BC000260,AKR1B1_BC005387	AKR1B1
AKR1C1_BC015490	AKR1C1	BC015490	3	AKR1C1_BC015490,AKR1C2_BC007024,AKR1C2_BC063574	AKR1C1,AKR1C2
AKR1C2_BC007024	AKR1C2	BC007024	3	AKR1C1_BC015490,AKR1C2_BC007024,AKR1C2_BC063574	AKR1C1,AKR1C2
AKR1C2_BC063574	AKR1C2	BC063574	3	AKR1C1_BC015490,AKR1C2_BC007024,AKR1C2_BC063574	AKR1C1,AKR1C2
AKR1C3_BC001479	AKR1C3	BC001479	2	AKR1C3_BC001479,AKR1C3_BC019230	AKR1C3
AKR1C3_BC019230	AKR1C3	BC019230	2	AKR1C3_BC001479,AKR1C3_BC019230	AKR1C3
AKR1C4_BC020744	AKR1C4	BC020744	1	AKR1C4_BC020744	AKR1C4
AKR1CL2_BC002862	AKR1CL2	BC002862	1	AKR1CL2_BC002862	AKR1CL2
AKR7A2_BC010852	AKR7A2	BC010852	1	AKR7A2_BC010852	AKR7A2
AKR7A3_BC025709	AKR7A3	BC025709	2	AKR7A3_BC025709,AKR7A3_BC031562	AKR7A3
AKR7A3_BC031562	AKR7A3	BC031562	2	AKR7A3_BC025709,AKR7A3_BC031562	AKR7A3
AKT1_BC000479	AKT1	BC000479	1	AKT1_BC000479	AKT1
AKT1S1_BC015562	AKT1S1	BC015562	1	AKT1S1_BC015562	AKT1S1
AKT2_BC063421	AKT2	BC063421	1	AKT2_BC063421	AKT2
ALAS1_BC011798	ALAS1	BC011798	1	ALAS1_BC011798	ALAS1
ALAS2_BC030230	ALAS2	BC030230	1	ALAS2_BC030230	ALAS2
ALB_BC035969	ALB	BC035969	2	ALB_BC035969,ALB_BC039235	ALB
ALB_BC039235	ALB	BC039235	2	ALB_BC035969,ALB_BC039235	ALB
ALDH16A1_BC014895	ALDH16A1	BC014895	1	ALDH16A1_BC014895	ALDH16A1
ALDH1A1_BC001505	ALDH1A1	BC001505	1	ALDH1A1_BC001505	ALDH1A1
ALDH1A2_BC030589	ALDH1A2	BC030589	1	ALDH1A2_BC030589	ALDH1A2
ALDH1A3_BC009245	ALDH1A3	BC009245	1	ALDH1A3_BC009245	ALDH1A3
ALDH1B1_BC001619	ALDH1B1	BC001619	1	ALDH1B1_BC001619	ALDH1B1
ALDH1L1_BC027241	ALDH1L1	BC027241	1	ALDH1L1_BC027241	ALDH1L1
ALDH2_BC002967	ALDH2	BC002967	1	ALDH2_BC002967	ALDH2
ALDH3A1_BC008892	ALDH3A1	BC008892	1	ALDH3A1_BC008892	ALDH3A1
ALDH3A2_BC002430	ALDH3A2	BC002430	1	ALDH3A2_BC002430	ALDH3A2
ALDH3B1_BC002553	ALDH3B1	BC002553	3	ALDH3B1_BC002553,ALDH3B1_BC013584,ALDH3B1_BC033099	ALDH3B1
ALDH3B1_BC013584	ALDH3B1	BC013584	3	ALDH3B1_BC002553,ALDH3B1_BC013584,ALDH3B1_BC033099	ALDH3B1
ALDH3B1_BC033099	ALDH3B1	BC033099	3	ALDH3B1_BC002553,ALDH3B1_BC013584,ALDH3B1_BC033099	ALDH3B1
ALDH3B2_BC007685	ALDH3B2	BC007685	1	ALDH3B2_BC007685	ALDH3B2
ALDH4A1_BC007581	ALDH4A1	BC007581	1	ALDH4A1_BC007581	ALDH4A1
ALDH6A1_BC004909	ALDH6A1	BC004909	1	ALDH6A1_BC004909	ALDH6A1
ALDOA_BC013614	ALDOA	BC013614	1	ALDOA_BC013614	ALDOA
ALF_BC025991	ALF	BC025991	1	ALF_BC025991	ALF
ALG10_BC033730	ALG10	BC033730	1	ALG10_BC033730	ALG10
ALG12_BC001729	ALG12	BC001729	1	ALG12_BC001729	ALG12
ALG14_BC011706	ALG14	BC011706	1	ALG14_BC011706	ALG14
ALG1_BC004402	ALG1	BC004402	1	ALG1_BC004402	ALG1
ALG2_BC015126	ALG2	BC015126	1	ALG2_BC015126	ALG2
ALG2_BC017876	ALG2	BC017876	1	ALG2_BC017876	ALG2
ALG3_BC002839	ALG3	BC002839	1	ALG3_BC002839	ALG3
ALG5_BC012531	ALG5	BC012531	1	ALG5_BC012531	ALG5
ALG8_BC001133	ALG8	BC001133	1	ALG8_BC001133	ALG8
ALG9_BC009255	ALG9	BC009255	1	ALG9_BC009255	ALG9
ALKBH_BC025787	ALKBH	BC025787	1	ALKBH_BC025787	ALKBH
ALOX12B_BC041058	ALOX12B	BC041058	1	ALOX12B_BC041058	ALOX12B
ALOX15B_BC035217	ALOX15B	BC035217	2	ALOX15B_BC035217,ALOX15B_BC063647	ALOX15B
ALOX15B_BC063647	ALOX15B	BC063647	2	ALOX15B_BC035217,ALOX15B_BC063647	ALOX15B
ALOX5AP_BC018538	ALOX5AP	BC018538	1	ALOX5AP_BC018538	ALOX5AP
ALPK1_BC060780	ALPK1	BC060780	1	ALPK1_BC060780	ALPK1
ALS2_BC029174	ALS2	BC029174	1	ALS2_BC029174	ALS2
ALS2CR11_BC030659	ALS2CR11	BC030659	1	ALS2CR11_BC030659	ALS2CR11
ALS2CR12_BC031603	ALS2CR12	BC031603	1	ALS2CR12_BC031603	ALS2CR12
ALS2CR15_BC000993	ALS2CR15	BC000993	1	ALS2CR15_BC000993	ALS2CR15
ALS2CR2_BC008302	ALS2CR2	BC008302	1	ALS2CR2_BC008302	ALS2CR2
ALS2CR3_BC041330	ALS2CR3	BC041330	1	ALS2CR3_BC041330	ALS2CR3
ALS2CR4_BC029611	ALS2CR4	BC029611	1	ALS2CR4_BC029611	ALS2CR4
ALS2CR7_BC038807	ALS2CR7	BC038807	1	ALS2CR7_BC038807	ALS2CR7
ALS2CR8_BC033777	ALS2CR8	BC033777	1	ALS2CR8_BC033777	ALS2CR8
ALS4_BC032600	ALS4	BC032600	1	ALS4_BC032600	ALS4
AMACR_BC009471	AMACR	BC009471	1	AMACR_BC009471	AMACR
AMBP_BC041593	AMBP	BC041593	1	AMBP_BC041593	AMBP
AMFR_BC069197	AMFR	BC069197	1	AMFR_BC069197	AMFR
AMIGO1_BC040879	AMIGO1	BC040879	1	AMIGO1_BC040879	AMIGO1
AMIGO2_BC047595	AMIGO2	BC047595	1	AMIGO2_BC047595	AMIGO2
AMMECR1_BC060813	AMMECR1	BC060813	1	AMMECR1_BC060813	AMMECR1
AMOTL2_BC011454	AMOTL2	BC011454	1	AMOTL2_BC011454	AMOTL2
AMPD2_BC007711	AMPD2	BC007711	1	AMPD2_BC007711	AMPD2
AMPH_BC034376	AMPH	BC034376	1	AMPH_BC034376	AMPH
AMSH-LP_BC010846	AMSH-LP	BC010846	1	AMSH-LP_BC010846	AMSH-LP
AMT_BC007546	AMT	BC007546	1	AMT_BC007546	AMT
AMY1A_BC063129	AMY1A	BC063129	1	AMY1A_BC063129	AMY1A
AMY2A_BC007060	AMY2A	BC007060	3	AMY2A_BC007060,AMY2B_BC011179,AMY2B_BC020861	AMY2A,AMY2B
AMY2B_BC011179	AMY2B	BC011179	3	AMY2A_BC007060,AMY2B_BC011179,AMY2B_BC020861	AMY2A,AMY2B
AMY2B_BC020861	AMY2B	BC020861	3	AMY2A_BC007060,AMY2B_BC011179,AMY2B_BC020861	AMY2A,AMY2B
AMZ2_BC050709	AMZ2	BC050709	1	AMZ2_BC050709	AMZ2
ANAC_BC062710	ANAC	BC062710	1	ANAC_BC062710	ANAC
ANAPC10_BC005217	ANAPC10	BC005217	1	ANAPC10_BC005217	ANAPC10
ANAPC13_BC005398	ANAPC13	BC005398	1	ANAPC13_BC005398	ANAPC13
ANAPC2_BC032503	ANAPC2	BC032503	1	ANAPC2_BC032503	ANAPC2
ANAPC5_BC001081	ANAPC5	BC001081	2	ANAPC5_BC001081,ANAPC5_BC006301	ANAPC5
ANAPC5_BC006301	ANAPC5	BC006301	2	ANAPC5_BC001081,ANAPC5_BC006301	ANAPC5
ANG_BC054880	ANG	BC054880	2	ANG_BC054880,ANG_BC062698	ANG
ANG_BC062698	ANG	BC062698	2	ANG_BC054880,ANG_BC062698	ANG
ANGEL2_BC016966	ANGEL2	BC016966	1	ANGEL2_BC016966	ANGEL2
ANGEL2_BC047469	ANGEL2	BC047469	1	ANGEL2_BC047469	ANGEL2
ANGPT1_BC029406	ANGPT1	BC029406	1	ANGPT1_BC029406	ANGPT1
ANGPTL1_BC050640	ANGPTL1	BC050640	1	ANGPTL1_BC050640	ANGPTL1
ANGPTL2_BC012368	ANGPTL2	BC012368	1	ANGPTL2_BC012368	ANGPTL2
ANGPTL3_BC058287	ANGPTL3	BC058287	1	ANGPTL3_BC058287	ANGPTL3
ANGPTL4_BC023647	ANGPTL4	BC023647	1	ANGPTL4_BC023647	ANGPTL4
ANGPTL7_BC001881	ANGPTL7	BC001881	1	ANGPTL7_BC001881	ANGPTL7
ANK1_BC007930	ANK1	BC007930	2	ANK1_BC007930,ANK1_BC030957	ANK1
ANK1_BC030957	ANK1	BC030957	2	ANK1_BC007930,ANK1_BC030957	ANK1
ANKHD1_BC004457	ANKHD1	BC004457	1	ANKHD1_BC004457	ANKHD1
ANKHD1_BC009420	ANKHD1	BC009420	1	ANKHD1_BC009420	ANKHD1
ANKHD1_BC040231	ANKHD1	BC040231	1	ANKHD1_BC040231	ANKHD1
ANKMY1_BC033495	ANKMY1	BC033495	1	ANKMY1_BC033495	ANKMY1
ANKMY2_BC035353	ANKMY2	BC035353	1	ANKMY2_BC035353	ANKMY2
ANKRA2_BC012917	ANKRA2	BC012917	1	ANKRA2_BC012917	ANKRA2
ANKRD10_BC001727	ANKRD10	BC001727	2	ANKRD10_BC001727,ANKRD10_BC039715	ANKRD10
ANKRD10_BC039715	ANKRD10	BC039715	2	ANKRD10_BC001727,ANKRD10_BC039715	ANKRD10
ANKRD12_BC057225	ANKRD12	BC057225	1	ANKRD12_BC057225	ANKRD12
ANKRD13_BC057817	ANKRD13	BC057817	1	ANKRD13_BC057817	ANKRD13
ANKRD13D_BC044239	ANKRD13D	BC044239	1	ANKRD13D_BC044239	ANKRD13D
ANKRD16_BC062346	ANKRD16	BC062346	1	ANKRD16_BC062346	ANKRD16
ANKRD1_BC018667	ANKRD1	BC018667	1	ANKRD1_BC018667	ANKRD1
ANKRD22_BC021671	ANKRD22	BC021671	1	ANKRD22_BC021671	ANKRD22
ANKRD25_BC082762	ANKRD25	BC082762	1	ANKRD25_BC082762	ANKRD25
ANKRD27_BC050529	ANKRD27	BC050529	1	ANKRD27_BC050529	ANKRD27
ANKRD29_BC030622	ANKRD29	BC030622	1	ANKRD29_BC030622	ANKRD29
ANKRD36_BC046186	ANKRD36	BC046186	1	ANKRD36_BC046186	ANKRD36
ANKRD39_BC031303	ANKRD39	BC031303	1	ANKRD39_BC031303	ANKRD39
ANKRD40_BC012978	ANKRD40	BC012978	1	ANKRD40_BC012978	ANKRD40
ANKRD44_BC016985	ANKRD44	BC016985	2	ANKRD44_BC016985,ANKRD44_BC063622	ANKRD44
ANKRD44_BC063622	ANKRD44	BC063622	2	ANKRD44_BC016985,ANKRD44_BC063622	ANKRD44
ANKRD49_BC017798	ANKRD49	BC017798	1	ANKRD49_BC017798	ANKRD49
ANKRD5_BC022878	ANKRD5	BC022878	1	ANKRD5_BC022878	ANKRD5
ANKRD6_BC042173	ANKRD6	BC042173	1	ANKRD6_BC042173	ANKRD6
ANKRD7_BC032799	ANKRD7	BC032799	1	ANKRD7_BC032799	ANKRD7
ANLN_BC034692	ANLN	BC034692	1	ANLN_BC034692	ANLN
ANP32B_BC013003	ANP32B	BC013003	1	ANP32B_BC013003	ANP32B
ANTXR1_BC012074	ANTXR1	BC012074	1	ANTXR1_BC012074	ANTXR1
ANTXR2_BC034001	ANTXR2	BC034001	1	ANTXR2_BC034001	ANTXR2
ANUBL1_BC048968	ANUBL1	BC048968	1	ANUBL1_BC048968	ANUBL1
ANXA10_BC007320	ANXA10	BC007320	1	ANXA10_BC007320	ANXA10
ANXA11_BC007564	ANXA11	BC007564	1	ANXA11_BC007564	ANXA11
ANXA1_BC001275	ANXA1	BC001275	2	ANXA1_BC001275,ANXA1_BC035993	ANXA1
ANXA1_BC035993	ANXA1	BC035993	2	ANXA1_BC001275,ANXA1_BC035993	ANXA1
ANXA2_BC009564	ANXA2	BC009564	3	ANXA2_BC009564,ANXA2_BC023990,ANXA2_BC052567	ANXA2
ANXA2_BC023990	ANXA2	BC023990	3	ANXA2_BC009564,ANXA2_BC023990,ANXA2_BC052567	ANXA2
ANXA2_BC052567	ANXA2	BC052567	3	ANXA2_BC009564,ANXA2_BC023990,ANXA2_BC052567	ANXA2
ANXA3_BC000871	ANXA3	BC000871	1	ANXA3_BC000871	ANXA3
ANXA4_BC000182	ANXA4	BC000182	2	ANXA4_BC000182,ANXA4_BC063672	ANXA4
ANXA4_BC063672	ANXA4	BC063672	2	ANXA4_BC000182,ANXA4_BC063672	ANXA4
ANXA5_BC004993	ANXA5	BC004993	2	ANXA5_BC004993,ANXA5_BC018671	ANXA5
ANXA5_BC018671	ANXA5	BC018671	2	ANXA5_BC004993,ANXA5_BC018671	ANXA5
ANXA6_BC017046	ANXA6	BC017046	1	ANXA6_BC017046	ANXA6
ANXA7_BC002632	ANXA7	BC002632	1	ANXA7_BC002632	ANXA7
ANXA8_BC004376	ANXA8	BC004376	3	ANXA8_BC004376,ANXA8_BC008813,ANXA8_BC073755	ANXA8
ANXA8_BC008813	ANXA8	BC008813	3	ANXA8_BC004376,ANXA8_BC008813,ANXA8_BC073755	ANXA8
ANXA8_BC073755	ANXA8	BC073755	3	ANXA8_BC004376,ANXA8_BC008813,ANXA8_BC073755	ANXA8
ANXA9_BC005830	ANXA9	BC005830	1	ANXA9_BC005830	ANXA9
AOAH_BC025698	AOAH	BC025698	1	AOAH_BC025698	AOAH
AOC3_BC050549	AOC3	BC050549	1	AOC3_BC050549	AOC3
AOF2_BC048134	AOF2	BC048134	1	AOF2_BC048134	AOF2
AP1G1_BC036283	AP1G1	BC036283	1	AP1G1_BC036283	AP1G1
AP1G2_BC051833	AP1G2	BC051833	1	AP1G2_BC051833	AP1G2
AP1M1_BC017469	AP1M1	BC017469	1	AP1M1_BC017469	AP1M1
AP1M2_BC003387	AP1M2	BC003387	3	AP1M2_BC003387,AP1M2_BC003612,AP1M2_BC005021	AP1M2
AP1M2_BC003612	AP1M2	BC003612	3	AP1M2_BC003387,AP1M2_BC003612,AP1M2_BC005021	AP1M2
AP1M2_BC005021	AP1M2	BC005021	3	AP1M2_BC003387,AP1M2_BC003612,AP1M2_BC005021	AP1M2
AP1S1_BC003561	AP1S1	BC003561	1	AP1S1_BC003561	AP1S1
AP1S2_BC001117	AP1S2	BC001117	1	AP1S2_BC001117	AP1S2
AP1S3_BC009606	AP1S3	BC009606	2	AP1S3_BC009606,AP1S3_BC021898	AP1S3
AP1S3_BC021898	AP1S3	BC021898	2	AP1S3_BC009606,AP1S3_BC021898	AP1S3
AP2A1_BC014214	AP2A1	BC014214	1	AP2A1_BC014214	AP2A1
AP2A2_BC006155	AP2A2	BC006155	1	AP2A2_BC006155	AP2A2
AP2B1_BC006201	AP2B1	BC006201	1	AP2B1_BC006201	AP2B1
AP2M1_BC004996	AP2M1	BC004996	2	AP2M1_BC004996,AP2M1_BC013796	AP2M1
AP2M1_BC013796	AP2M1	BC013796	2	AP2M1_BC004996,AP2M1_BC013796	AP2M1
AP2S1_BC006337	AP2S1	BC006337	1	AP2S1_BC006337	AP2S1
AP3B1_BC038444	AP3B1	BC038444	1	AP3B1_BC038444	AP3B1
AP3D1_BC010065	AP3D1	BC010065	1	AP3D1_BC010065	AP3D1
AP3M1_BC067127	AP3M1	BC067127	1	AP3M1_BC067127	AP3M1
AP3M2_BC056257	AP3M2	BC056257	1	AP3M2_BC056257	AP3M2
AP3S1_BC000804	AP3S1	BC000804	1	AP3S1_BC000804	AP3S1
AP3S2_BC010020	AP3S2	BC010020	1	AP3S2_BC010020	AP3S2
AP4B1_BC014146	AP4B1	BC014146	1	AP4B1_BC014146	AP4B1
AP4M1_BC018705	AP4M1	BC018705	1	AP4M1_BC018705	AP4M1
APBA3_BC008338	APBA3	BC008338	1	APBA3_BC008338	APBA3
APBB1_BC010854	APBB1	BC010854	1	APBB1_BC010854	APBB1
APBB1IP_BC035636	APBB1IP	BC035636	1	APBB1IP_BC035636	APBB1IP
APBB2_BC027946	APBB2	BC027946	1	APBB2_BC027946	APBB2
APBB3_BC013158	APBB3	BC013158	1	APBB3_BC013158	APBB3
APCDD1_BC053324	APCDD1	BC053324	1	APCDD1_BC053324	APCDD1
APCS_BC007039	APCS	BC007039	1	APCS_BC007039	APCS
APEG1_BC006346	APEG1	BC006346	1	APEG1_BC006346	APEG1
APEH_BC000362	APEH	BC000362	1	APEH_BC000362	APEH
APEX1_BC004979	APEX1	BC004979	2	APEX1_BC004979,APEX1_BC008145	APEX1
APEX1_BC008145	APEX1	BC008145	2	APEX1_BC004979,APEX1_BC008145	APEX1
APEX2_BC002959	APEX2	BC002959	1	APEX2_BC002959	APEX2
APH1A_BC001230	APH1A	BC001230	3	APH1A_BC001230,APH1A_BC017699,APH1A_BC020590	APH1A
APH1A_BC017699	APH1A	BC017699	3	APH1A_BC001230,APH1A_BC017699,APH1A_BC020590	APH1A
APH1A_BC020590	APH1A	BC020590	3	APH1A_BC001230,APH1A_BC017699,APH1A_BC020590	APH1A
APH1B_BC020905	APH1B	BC020905	1	APH1B_BC020905	APH1B
APIN_BC017796	APIN	BC017796	1	APIN_BC017796	APIN
APITD1_BC029430	APITD1	BC029430	1	APITD1_BC029430	APITD1
APLN_BC021104	APLN	BC021104	1	APLN_BC021104	APLN
APLP1_BC012889	APLP1	BC012889	1	APLP1_BC012889	APLP1
APLP2_BC000373	APLP2	BC000373	2	APLP2_BC000373,APLP2_BC004371	APLP2
APLP2_BC004371	APLP2	BC004371	2	APLP2_BC000373,APLP2_BC004371	APLP2
APOA1_BC005380	APOA1	BC005380	1	APOA1_BC005380	APOA1
APOA2_BC005282	APOA2	BC005282	1	APOA2_BC005282	APOA2
APOBEC3B_BC053859	APOBEC3B	BC053859	2	APOBEC3B_BC053859,APOBEC3F_BC017022	APOBEC3B,APOBEC3F
APOBEC3C_BC011739	APOBEC3C	BC011739	1	APOBEC3C_BC011739	APOBEC3C
APOBEC3F_BC017022	APOBEC3F	BC017022	2	APOBEC3B_BC053859,APOBEC3F_BC017022	APOBEC3B,APOBEC3F
APOBEC3F_BC038808	APOBEC3F	BC038808	3	APOBEC3F_BC038808,APOBEC3F_BC061914,APOBEC3G_BC024268	APOBEC3F,APOBEC3G
APOBEC3F_BC061914	APOBEC3F	BC061914	3	APOBEC3F_BC038808,APOBEC3F_BC061914,APOBEC3G_BC024268	APOBEC3F,APOBEC3G
APOBEC3G_BC024268	APOBEC3G	BC024268	3	APOBEC3F_BC038808,APOBEC3F_BC061914,APOBEC3G_BC024268	APOBEC3F,APOBEC3G
APOC1_BC009698	APOC1	BC009698	1	APOC1_BC009698	APOC1
APOC2_BC005348	APOC2	BC005348	2	APOC2_BC005348,APOC2_BC065270	APOC2
APOC2_BC065270	APOC2	BC065270	2	APOC2_BC005348,APOC2_BC065270	APOC2
APOC3_BC027977	APOC3	BC027977	1	APOC3_BC027977	APOC3
APOD_BC007402	APOD	BC007402	1	APOD_BC007402	APOD
APOE_BC003557	APOE	BC003557	1	APOE_BC003557	APOE
APOF_BC026257	APOF	BC026257	1	APOF_BC026257	APOF
APOH_BC026283	APOH	BC026283	1	APOH_BC026283	APOH
APOL1_BC017331	APOL1	BC017331	1	APOL1_BC017331	APOL1
APOL2_BC004395	APOL2	BC004395	1	APOL2_BC004395	APOL2
APOL4_BC006276	APOL4	BC006276	1	APOL4_BC006276	APOL4
APOL6_BC038950	APOL6	BC038950	1	APOL6_BC038950	APOL6
APOM_BC020683	APOM	BC020683	1	APOM_BC020683	APOM
APP_BC004369	APP	BC004369	1	APP_BC004369	APP
APPBP1_BC000480	APPBP1	BC000480	1	APPBP1_BC000480	APPBP1
APPBP2_BC018121	APPBP2	BC018121	1	APPBP2_BC018121	APPBP2
APPL_BC028599	APPL	BC028599	1	APPL_BC028599	APPL
APTX_BC001628	APTX	BC001628	1	APTX_BC001628	APTX
AQP10_BC069607	AQP10	BC069607	1	AQP10_BC069607	AQP10
AQP11_BC040443	AQP11	BC040443	1	AQP11_BC040443	AQP11
AQP1_BC022486	AQP1	BC022486	1	AQP1_BC022486	AQP1
AQP3_BC013566	AQP3	BC013566	1	AQP3_BC013566	AQP3
AQP4_BC022286	AQP4	BC022286	1	AQP4_BC022286	AQP4
AQP5_BC032946	AQP5	BC032946	1	AQP5_BC032946	AQP5
AQP7_BC062701	AQP7	BC062701	1	AQP7_BC062701	AQP7
AQP7P2_BC070322	AQP7P2	BC070322	1	AQP7P2_BC070322	AQP7P2
AQP8_BC040630	AQP8	BC040630	1	AQP8_BC040630	AQP8
AQP9_BC026258	AQP9	BC026258	1	AQP9_BC026258	AQP9
ARAF_BC002466	ARAF	BC002466	2	ARAF_BC002466,ARAF_BC007514	ARAF
ARAF_BC007514	ARAF	BC007514	2	ARAF_BC002466,ARAF_BC007514	ARAF
ARC_BC012321	ARC	BC012321	1	ARC_BC012321	ARC
ARD1A_BC000308	ARD1A	BC000308	2	ARD1A_BC000308,ARD1A_BC063377	ARD1A
ARD1A_BC063377	ARD1A	BC063377	2	ARD1A_BC000308,ARD1A_BC063377	ARD1A
AREG_BC009799	AREG	BC009799	1	AREG_BC009799	AREG
ARF1_BC011358	ARF1	BC011358	1	ARF1_BC011358	ARF1
ARF3_BC028402	ARF3	BC028402	1	ARF3_BC028402	ARF3
ARF4_BC003364	ARF4	BC003364	1	ARF4_BC003364	ARF4
ARF4L_BC000043	ARF4L	BC000043	1	ARF4L_BC000043	ARF4L
ARF5_BC003043	ARF5	BC003043	1	ARF5_BC003043	ARF5
ARF6_BC008918	ARF6	BC008918	1	ARF6_BC008918	ARF6
ARF7_BC034354	ARF7	BC034354	1	ARF7_BC034354	ARF7
ARFGAP1_BC000786	ARFGAP1	BC000786	2	ARFGAP1_BC000786,ARFGAP1_BC028233	ARFGAP1
ARFGAP1_BC028233	ARFGAP1	BC028233	2	ARFGAP1_BC000786,ARFGAP1_BC028233	ARFGAP1
ARFGAP3_BC005122	ARFGAP3	BC005122	1	ARFGAP3_BC005122	ARFGAP3
ARFIP2_BC000392	ARFIP2	BC000392	1	ARFIP2_BC000392	ARFIP2
ARFRP2_BC026093	ARFRP2	BC026093	1	ARFRP2_BC026093	ARFRP2
ARG1_BC020653	ARG1	BC020653	1	ARG1_BC020653	ARG1
ARG2_BC029050	ARG2	BC029050	1	ARG2_BC029050	ARG2
ARG99_BC028716	ARG99	BC028716	1	ARG99_BC028716	ARG99
ARG99_BC042083	ARG99	BC042083	1	ARG99_BC042083	ARG99
ARHGAP11A_BC063444	ARHGAP11A	BC063444	1	ARHGAP11A_BC063444	ARHGAP11A
ARHGAP15_BC016701	ARHGAP15	BC016701	1	ARHGAP15_BC016701	ARHGAP15
ARHGAP17_BC001241	ARHGAP17	BC001241	1	ARHGAP17_BC001241	ARHGAP17
ARHGAP17_BC080195	ARHGAP17	BC080195	1	ARHGAP17_BC080195	ARHGAP17
ARHGAP19_BC007848	ARHGAP19	BC007848	1	ARHGAP19_BC007848	ARHGAP19
ARHGAP1_BC018118	ARHGAP1	BC018118	1	ARHGAP1_BC018118	ARHGAP1
ARHGAP20_BC039340	ARHGAP20	BC039340	1	ARHGAP20_BC039340	ARHGAP20
ARHGAP24_BC047918	ARHGAP24	BC047918	1	ARHGAP24_BC047918	ARHGAP24
ARHGAP25_BC039591	ARHGAP25	BC039591	1	ARHGAP25_BC039591	ARHGAP25
ARHGAP26_BC068555	ARHGAP26	BC068555	1	ARHGAP26_BC068555	ARHGAP26
ARHGAP28_BC033668	ARHGAP28	BC033668	1	ARHGAP28_BC033668	ARHGAP28
ARHGAP28_BC065274	ARHGAP28	BC065274	1	ARHGAP28_BC065274	ARHGAP28
ARHGAP29_BC022483	ARHGAP29	BC022483	1	ARHGAP29_BC022483	ARHGAP29
ARHGAP5_BC075799	ARHGAP5	BC075799	1	ARHGAP5_BC075799	ARHGAP5
ARHGAP9_BC006107	ARHGAP9	BC006107	1	ARHGAP9_BC006107	ARHGAP9
ARHGDIA_BC016031	ARHGDIA	BC016031	1	ARHGDIA_BC016031	ARHGDIA
ARHGDIG_BC047699	ARHGDIG	BC047699	1	ARHGDIG_BC047699	ARHGDIG
ARHGEF10_BC036809	ARHGEF10	BC036809	1	ARHGEF10_BC036809	ARHGEF10
ARHGEF10_BC040474	ARHGEF10	BC040474	1	ARHGEF10_BC040474	ARHGEF10
ARHGEF15_BC036749	ARHGEF15	BC036749	1	ARHGEF15_BC036749	ARHGEF15
ARHGEF16_BC002681	ARHGEF16	BC002681	2	ARHGEF16_BC002681,ARHGEF16_BC051838	ARHGEF16
ARHGEF16_BC051838	ARHGEF16	BC051838	2	ARHGEF16_BC002681,ARHGEF16_BC051838	ARHGEF16
ARHGEF18_BC008016	ARHGEF18	BC008016	1	ARHGEF18_BC008016	ARHGEF18
ARHGEF1_BC011726	ARHGEF1	BC011726	2	ARHGEF1_BC011726,ARHGEF1_BC034013	ARHGEF1
ARHGEF1_BC034013	ARHGEF1	BC034013	2	ARHGEF1_BC011726,ARHGEF1_BC034013	ARHGEF1
ARHGEF2_BC020567	ARHGEF2	BC020567	1	ARHGEF2_BC020567	ARHGEF2
ARHGEF5_BC010046	ARHGEF5	BC010046	1	ARHGEF5_BC010046	ARHGEF5
ARHGEF7_BC033905	ARHGEF7	BC033905	2	ARHGEF7_BC033905,ARHGEF7_BC060776	ARHGEF7
ARHGEF7_BC060776	ARHGEF7	BC060776	2	ARHGEF7_BC033905,ARHGEF7_BC060776	ARHGEF7
ARID3A_BC060828	ARID3A	BC060828	1	ARID3A_BC060828	ARID3A
ARID5A_BC067301	ARID5A	BC067301	1	ARID5A_BC067301	ARID5A
ARIH2_BC000422	ARIH2	BC000422	1	ARIH2_BC000422	ARIH2
ARL10B_BC015408	ARL10B	BC015408	1	ARL10B_BC015408	ARL10B
ARL10C_BC013131	ARL10C	BC013131	1	ARL10C_BC013131	ARL10C
ARL11_BC013150	ARL11	BC013150	1	ARL11_BC013150	ARL11
ARL1_BC007000	ARL1	BC007000	1	ARL1_BC007000	ARL1
ARL2_BC002530	ARL2	BC002530	1	ARL2_BC002530	ARL2
ARL2BP_BC003087	ARL2BP	BC003087	1	ARL2BP_BC003087	ARL2BP
ARL4_BC001111	ARL4	BC001111	1	ARL4_BC001111	ARL4
ARL6_BC024239	ARL6	BC024239	1	ARL6_BC024239	ARL6
ARL6IP2_BC053508	ARL6IP2	BC053508	1	ARL6IP2_BC053508	ARL6IP2
ARL6IP4_BC001958	ARL6IP4	BC001958	2	ARL6IP4_BC001958,ARL6IP4_BC015569	ARL6IP4
ARL6IP4_BC015569	ARL6IP4	BC015569	2	ARL6IP4_BC001958,ARL6IP4_BC015569	ARL6IP4
ARL6IP5_BC005143	ARL6IP5	BC005143	1	ARL6IP5_BC005143	ARL6IP5
ARL6IP6_BC028741	ARL6IP6	BC028741	1	ARL6IP6_BC028741	ARL6IP6
ARL6IP_BC010281	ARL6IP	BC010281	1	ARL6IP_BC010281	ARL6IP
ARMC1_BC011607	ARMC1	BC011607	1	ARMC1_BC011607	ARMC1
ARMC2_BC030603	ARMC2	BC030603	1	ARMC2_BC030603	ARMC2
ARMC3_BC039312	ARMC3	BC039312	1	ARMC3_BC039312	ARMC3
ARMC5_BC014945	ARMC5	BC014945	1	ARMC5_BC014945	ARMC5
ARMC7_BC011728	ARMC7	BC011728	1	ARMC7_BC011728	ARMC7
ARMC8_BC013424	ARMC8	BC013424	1	ARMC8_BC013424	ARMC8
ARMC9_BC004514	ARMC9	BC004514	1	ARMC9_BC004514	ARMC9
ARMCX1_BC002691	ARMCX1	BC002691	1	ARMCX1_BC002691	ARMCX1
ARMCX2_BC015926	ARMCX2	BC015926	1	ARMCX2_BC015926	ARMCX2
ARMCX3_BC005194	ARMCX3	BC005194	1	ARMCX3_BC005194	ARMCX3
ARMCX4_BC032236	ARMCX4	BC032236	1	ARMCX4_BC032236	ARMCX4
ARMCX5_BC058904	ARMCX5	BC058904	2	ARMCX5_BC058904,ARMCX5_BC064983	ARMCX5
ARMCX5_BC064983	ARMCX5	BC064983	2	ARMCX5_BC058904,ARMCX5_BC064983	ARMCX5
ARMCX6_BC007677	ARMCX6	BC007677	1	ARMCX6_BC007677	ARMCX6
ARMET_BC007282	ARMET	BC007282	1	ARMET_BC007282	ARMET
ARNT2_BC036099	ARNT2	BC036099	1	ARNT2_BC036099	ARNT2
ARNT_BC060838	ARNT	BC060838	1	ARNT_BC060838	ARNT
ARNTL_BC041129	ARNTL	BC041129	1	ARNTL_BC041129	ARNTL
ARP10_BC069023	ARP10	BC069023	1	ARP10_BC069023	ARP10
ARPC1A_BC039594	ARPC1A	BC039594	1	ARPC1A_BC039594	ARPC1A
ARPC1B_BC007555	ARPC1B	BC007555	1	ARPC1B_BC007555	ARPC1B
ARPC3_BC067747	ARPC3	BC067747	1	ARPC3_BC067747	ARPC3
ARPC4_BC065423	ARPC4	BC065423	1	ARPC4_BC065423	ARPC4
ARPC5_BC057237	ARPC5	BC057237	1	ARPC5_BC057237	ARPC5
ARPC5L_BC000018	ARPC5L	BC000018	1	ARPC5L_BC000018	ARPC5L
ARPM1_BC007289	ARPM1	BC007289	1	ARPM1_BC007289	ARPM1
ARPM2_BC029499	ARPM2	BC029499	1	ARPM2_BC029499	ARPM2
ARPP-21_BC017805	ARPP-21	BC017805	2	ARPP-21_BC017805,ARPP-21_BC051828	ARPP-21
ARPP-21_BC051828	ARPP-21	BC051828	2	ARPP-21_BC017805,ARPP-21_BC051828	ARPP-21
ARR3_BC012096	ARR3	BC012096	1	ARR3_BC012096	ARR3
ARRB1_BC003636	ARRB1	BC003636	1	ARRB1_BC003636	ARRB1
ARRB2_BC007427	ARRB2	BC007427	1	ARRB2_BC007427	ARRB2
ARRDC1_BC032346	ARRDC1	BC032346	1	ARRDC1_BC032346	ARRDC1
ARRDC3_BC015928	ARRDC3	BC015928	1	ARRDC3_BC015928	ARRDC3
ARSA_BC014210	ARSA	BC014210	1	ARSA_BC014210	ARSA
ARSF_BC022389	ARSF	BC022389	1	ARSF_BC022389	ARSF
ARSJ_BC032010	ARSJ	BC032010	1	ARSJ_BC032010	ARSJ
ART3_BC008397	ART3	BC008397	2	ART3_BC008397,ART3_BC017913	ART3
ART3_BC017913	ART3	BC017913	2	ART3_BC008397,ART3_BC017913	ART3
ART5_BC014577	ART5	BC014577	1	ART5_BC014577	ART5
ARV1_BC016309	ARV1	BC016309	1	ARV1_BC016309	ARV1
ASAH1_BC016481	ASAH1	BC016481	1	ASAH1_BC016481	ASAH1
ASAH1_BC016828	ASAH1	BC016828	1	ASAH1_BC016828	ASAH1
ASAHL_BC011854	ASAHL	BC011854	1	ASAHL_BC011854	ASAHL
ASAM_BC009371	ASAM	BC009371	1	ASAM_BC009371	ASAM
ASB13_BC012056	ASB13	BC012056	1	ASB13_BC012056	ASB13
ASB17_BC036573	ASB17	BC036573	1	ASB17_BC036573	ASB17
ASB1_BC014528	ASB1	BC014528	1	ASB1_BC014528	ASB1
ASB2_BC032354	ASB2	BC032354	1	ASB2_BC032354	ASB2
ASB3_BC006488	ASB3	BC006488	1	ASB3_BC006488	ASB3
ASB5_BC065710	ASB5	BC065710	1	ASB5_BC065710	ASB5
ASB6_BC001719	ASB6	BC001719	2	ASB6_BC001719,ASB6_BC065913	ASB6
ASB6_BC065913	ASB6	BC065913	2	ASB6_BC001719,ASB6_BC065913	ASB6
ASB7_BC063581	ASB7	BC063581	1	ASB7_BC063581	ASB7
ASB8_BC001321	ASB8	BC001321	1	ASB8_BC001321	ASB8
ASB9_BC001244	ASB9	BC001244	2	ASB9_BC001244,ASB9_BC013172	ASB9
ASB9_BC013172	ASB9	BC013172	2	ASB9_BC001244,ASB9_BC013172	ASB9
ASCC1_BC012291	ASCC1	BC012291	1	ASCC1_BC012291	ASCC1
ASCC3_BC050681	ASCC3	BC050681	1	ASCC3_BC050681	ASCC3
ASCIZ_BC002701	ASCIZ	BC002701	1	ASCIZ_BC002701	ASCIZ
ASF1A_BC010878	ASF1A	BC010878	1	ASF1A_BC010878	ASF1A
ASF1B_BC036521	ASF1B	BC036521	1	ASF1B_BC036521	ASF1B
ASGR1_BC032130	ASGR1	BC032130	1	ASGR1_BC032130	ASGR1
ASGR2_BC017251	ASGR2	BC017251	1	ASGR2_BC017251	ASGR2
ASH2L_BC015936	ASH2L	BC015936	1	ASH2L_BC015936	ASH2L
ASK_BC036045	ASK	BC036045	1	ASK_BC036045	ASK
ASL_BC008195	ASL	BC008195	1	ASL_BC008195	ASL
ASMT_BC001620	ASMT	BC001620	1	ASMT_BC001620	ASMT
ASMTL_BC002508	ASMTL	BC002508	2	ASMTL_BC002508,ASMTL_BC010089	ASMTL
ASMTL_BC010089	ASMTL	BC010089	2	ASMTL_BC002508,ASMTL_BC010089	ASMTL
ASNA1_BC002651	ASNA1	BC002651	1	ASNA1_BC002651	ASNA1
ASNS_BC008723	ASNS	BC008723	2	ASNS_BC008723,ASNS_BC014621	ASNS
ASNS_BC014621	ASNS	BC014621	2	ASNS_BC008723,ASNS_BC014621	ASNS
ASPA_BC029128	ASPA	BC029128	1	ASPA_BC029128	ASPA
ASPH_BC025236	ASPH	BC025236	2	ASPH_BC025236,ASPH_BC066929	ASPH
ASPH_BC066929	ASPH	BC066929	2	ASPH_BC025236,ASPH_BC066929	ASPH
ASPM_BC034607	ASPM	BC034607	1	ASPM_BC034607	ASPM
ASPSCR1_BC006152	ASPSCR1	BC006152	1	ASPSCR1_BC006152	ASPSCR1
ASPSCR1_BC018722	ASPSCR1	BC018722	1	ASPSCR1_BC018722	ASPSCR1
ASRGL1_BC064963	ASRGL1	BC064963	1	ASRGL1_BC064963	ASRGL1
ASS_BC009243	ASS	BC009243	2	ASS_BC009243,ASS_BC021676	ASS
ASS_BC021676	ASS	BC021676	2	ASS_BC009243,ASS_BC021676	ASS
ASTN2_BC010680	ASTN2	BC010680	1	ASTN2_BC010680	ASTN2
ASTN2_BC029272	ASTN2	BC029272	1	ASTN2_BC029272	ASTN2
ASXL2_BC042999	ASXL2	BC042999	1	ASXL2_BC042999	ASXL2
ATAD1_BC010868	ATAD1	BC010868	1	ATAD1_BC010868	ATAD1
ATAD2_BC019909	ATAD2	BC019909	1	ATAD2_BC019909	ATAD2
ATAD3A_BC007803	ATAD3A	BC007803	1	ATAD3A_BC007803	ATAD3A
ATAD3B_BC009938	ATAD3B	BC009938	1	ATAD3B_BC009938	ATAD3B
ATAD3B_BC018701	ATAD3B	BC018701	1	ATAD3B_BC018701	ATAD3B
ATBF1_BC029653	ATBF1	BC029653	1	ATBF1_BC029653	ATBF1
ATCAY_BC026217	ATCAY	BC026217	1	ATCAY_BC026217	ATCAY
ATF1_BC029619	ATF1	BC029619	1	ATF1_BC029619	ATF1
ATF2_BC026175	ATF2	BC026175	1	ATF2_BC026175	ATF2
ATF3_BC006322	ATF3	BC006322	1	ATF3_BC006322	ATF3
ATF4_BC011994	ATF4	BC011994	2	ATF4_BC011994,ATF4_BC016855	ATF4
ATF4_BC016855	ATF4	BC016855	2	ATF4_BC011994,ATF4_BC016855	ATF4
ATF6_BC014969	ATF6	BC014969	1	ATF6_BC014969	ATF6
ATF7_BC042363	ATF7	BC042363	1	ATF7_BC042363	ATF7
ATG10_BC004551	ATG10	BC004551	1	ATG10_BC004551	ATG10
ATG10_BC029268	ATG10	BC029268	1	ATG10_BC029268	ATG10
ATG12_BC011033	ATG12	BC011033	2	ATG12_BC011033,ATG12_BC012266	ATG12
ATG12_BC012266	ATG12	BC012266	2	ATG12_BC011033,ATG12_BC012266	ATG12
ATG3_BC024221	ATG3	BC024221	1	ATG3_BC024221	ATG3
ATG4A_BC061696	ATG4A	BC061696	1	ATG4A_BC061696	ATG4A
ATG4C_BC033024	ATG4C	BC033024	1	ATG4C_BC033024	ATG4C
ATG4D_BC007639	ATG4D	BC007639	1	ATG4D_BC007639	ATG4D
ATG4D_BC068992	ATG4D	BC068992	1	ATG4D_BC068992	ATG4D
ATG5_BC002699	ATG5	BC002699	1	ATG5_BC002699	ATG5
ATG7_BC000091	ATG7	BC000091	1	ATG7_BC000091	ATG7
ATG9A_BC001206	ATG9A	BC001206	1	ATG9A_BC001206	ATG9A
ATG9A_BC065534	ATG9A	BC065534	1	ATG9A_BC065534	ATG9A
ATIC_BC008879	ATIC	BC008879	1	ATIC_BC008879	ATIC
ATM_BC022307	ATM	BC022307	1	ATM_BC022307	ATM
ATM_BC061584	ATM	BC061584	1	ATM_BC061584	ATM
ATOH1_BC069594	ATOH1	BC069594	1	ATOH1_BC069594	ATOH1
ATOH7_BC032621	ATOH7	BC032621	1	ATOH7_BC032621	ATOH7
ATP10D_BC057839	ATP10D	BC057839	1	ATP10D_BC057839	ATP10D
ATP11B_BC033880	ATP11B	BC033880	1	ATP11B_BC033880	ATP11B
ATP11B_BC042180	ATP11B	BC042180	1	ATP11B_BC042180	ATP11B
ATP12A_BC031609	ATP12A	BC031609	1	ATP12A_BC031609	ATP12A
ATP13A1_BC009302	ATP13A1	BC009302	1	ATP13A1_BC009302	ATP13A1
ATP13A2_BC030267	ATP13A2	BC030267	1	ATP13A2_BC030267	ATP13A2
ATP1A2_BC052271	ATP1A2	BC052271	1	ATP1A2_BC052271	ATP1A2
ATP1A3_BC009394	ATP1A3	BC009394	1	ATP1A3_BC009394	ATP1A3
ATP1A4_BC028297	ATP1A4	BC028297	1	ATP1A4_BC028297	ATP1A4
ATP1B1_BC000006	ATP1B1	BC000006	1	ATP1B1_BC000006	ATP1B1
ATP1B3_BC011835	ATP1B3	BC011835	1	ATP1B3_BC011835	ATP1B3
ATP2A2_BC035588	ATP2A2	BC035588	1	ATP2A2_BC035588	ATP2A2
ATP2C1_BC028139	ATP2C1	BC028139	1	ATP2C1_BC028139	ATP2C1
ATP4B_BC029059	ATP4B	BC029059	1	ATP4B_BC029059	ATP4B
ATP5A1_BC011384	ATP5A1	BC011384	2	ATP5A1_BC011384,ATP5A1_BC019310	ATP5A1
ATP5A1_BC019310	ATP5A1	BC019310	2	ATP5A1_BC011384,ATP5A1_BC019310	ATP5A1
ATP5B_BC016512	ATP5B	BC016512	1	ATP5B_BC016512	ATP5B
ATP5C1_BC000931	ATP5C1	BC000931	2	ATP5C1_BC000931,ATP5C1_BC016812	ATP5C1
ATP5C1_BC016812	ATP5C1	BC016812	2	ATP5C1_BC000931,ATP5C1_BC016812	ATP5C1
ATP5D_BC002389	ATP5D	BC002389	1	ATP5D_BC002389	ATP5D
ATP5F1_BC005366	ATP5F1	BC005366	2	ATP5F1_BC005366,ATP5F1_BC005960	ATP5F1
ATP5F1_BC005960	ATP5F1	BC005960	2	ATP5F1_BC005366,ATP5F1_BC005960	ATP5F1
ATP5G1_BC004963	ATP5G1	BC004963	1	ATP5G1_BC004963	ATP5G1
ATP5H_BC032245	ATP5H	BC032245	2	ATP5H_BC032245,ATP5H_BC038092	ATP5H
ATP5H_BC038092	ATP5H	BC038092	2	ATP5H_BC032245,ATP5H_BC038092	ATP5H
ATP5I_BC003679	ATP5I	BC003679	1	ATP5I_BC003679	ATP5I
ATP5J2_BC003678	ATP5J2	BC003678	1	ATP5J2_BC003678	ATP5J2
ATP5J_BC001178	ATP5J	BC001178	2	ATP5J_BC001178,ATP5J_BC066310	ATP5J
ATP5J_BC066310	ATP5J	BC066310	2	ATP5J_BC001178,ATP5J_BC066310	ATP5J
ATP5L_BC015128	ATP5L	BC015128	2	ATP5L_BC015128,ATP5L_BC070165	ATP5L
ATP5L_BC070165	ATP5L	BC070165	2	ATP5L_BC015128,ATP5L_BC070165	ATP5L
ATP5O_BC021233	ATP5O	BC021233	1	ATP5O_BC021233	ATP5O
ATP5S_BC011549	ATP5S	BC011549	1	ATP5S_BC011549	ATP5S
ATP6AP1_BC000724	ATP6AP1	BC000724	1	ATP6AP1_BC000724	ATP6AP1
ATP6AP2_BC010395	ATP6AP2	BC010395	1	ATP6AP2_BC010395	ATP6AP2
ATP6V0A1_BC032398	ATP6V0A1	BC032398	1	ATP6V0A1_BC032398	ATP6V0A1
ATP6V0A2_BC068531	ATP6V0A2	BC068531	1	ATP6V0A2_BC068531	ATP6V0A2
ATP6V0B_BC000423	ATP6V0B	BC000423	1	ATP6V0B_BC000423	ATP6V0B
ATP6V0C_BC007759	ATP6V0C	BC007759	2	ATP6V0C_BC007759,ATP6V0C_BC009290	ATP6V0C
ATP6V0C_BC009290	ATP6V0C	BC009290	2	ATP6V0C_BC007759,ATP6V0C_BC009290	ATP6V0C
ATP6V0C_BC010147	ATP6V0C	BC010147	1	ATP6V0C_BC010147	ATP6V0C
ATP6V0D1_BC008861	ATP6V0D1	BC008861	1	ATP6V0D1_BC008861	ATP6V0D1
ATP6V0E2L_BC015899	ATP6V0E2L	BC015899	1	ATP6V0E2L_BC015899	ATP6V0E2L
ATP6V1B1_BC035978	ATP6V1B1	BC035978	1	ATP6V1B1_BC035978	ATP6V1B1
ATP6V1B1_BC063411	ATP6V1B1	BC063411	1	ATP6V1B1_BC063411	ATP6V1B1
ATP6V1B2_BC003100	ATP6V1B2	BC003100	2	ATP6V1B2_BC003100,ATP6V1B2_BC030640	ATP6V1B2
ATP6V1B2_BC030640	ATP6V1B2	BC030640	2	ATP6V1B2_BC003100,ATP6V1B2_BC030640	ATP6V1B2
ATP6V1C1_BC010960	ATP6V1C1	BC010960	1	ATP6V1C1_BC010960	ATP6V1C1
ATP6V1C2_BC012142	ATP6V1C2	BC012142	1	ATP6V1C2_BC012142	ATP6V1C2
ATP6V1D_BC001411	ATP6V1D	BC001411	3	ATP6V1D_BC001411,ATP6V1D_BC025373,ATP6V1D_BC031002	ATP6V1D
ATP6V1D_BC025373	ATP6V1D	BC025373	3	ATP6V1D_BC001411,ATP6V1D_BC025373,ATP6V1D_BC031002	ATP6V1D
ATP6V1D_BC031002	ATP6V1D	BC031002	3	ATP6V1D_BC001411,ATP6V1D_BC025373,ATP6V1D_BC031002	ATP6V1D
ATP6V1E1_BC004443	ATP6V1E1	BC004443	1	ATP6V1E1_BC004443	ATP6V1E1
ATP6V1E2_BC008981	ATP6V1E2	BC008981	1	ATP6V1E2_BC008981	ATP6V1E2
ATP6V1G1_BC003564	ATP6V1G1	BC003564	2	ATP6V1G1_BC003564,ATP6V1G1_BC008452	ATP6V1G1
ATP6V1G1_BC008452	ATP6V1G1	BC008452	2	ATP6V1G1_BC003564,ATP6V1G1_BC008452	ATP6V1G1
ATP9B_BC053561	ATP9B	BC053561	1	ATP9B_BC053561	ATP9B
ATPAF2_BC004114	ATPAF2	BC004114	2	ATPAF2_BC004114,ATPAF2_BC032126	ATPAF2
ATPAF2_BC032126	ATPAF2	BC032126	2	ATPAF2_BC004114,ATPAF2_BC032126	ATPAF2
ATPBD1B_BC007815	ATPBD1B	BC007815	2	ATPBD1B_BC007815,ATPBD1B_BC008634	ATPBD1B
ATPBD1B_BC008634	ATPBD1B	BC008634	2	ATPBD1B_BC007815,ATPBD1B_BC008634	ATPBD1B
ATPBD1C_BC008416	ATPBD1C	BC008416	2	ATPBD1C_BC008416,ATPBD1C_BC031024	ATPBD1C
ATPBD1C_BC031024	ATPBD1C	BC031024	2	ATPBD1C_BC008416,ATPBD1C_BC031024	ATPBD1C
ATPIF1_BC009677	ATPIF1	BC009677	2	ATPIF1_BC009677,NA_BC001867	ATPIF1,NA
ATRNL1_BC047716	ATRNL1	BC047716	1	ATRNL1_BC047716	ATRNL1
ATXN10_BC007508	ATXN10	BC007508	1	ATXN10_BC007508	ATXN10
ATXN3_BC033711	ATXN3	BC033711	1	ATXN3_BC033711	ATXN3
ATXN7L1_BC003517	ATXN7L1	BC003517	1	ATXN7L1_BC003517	ATXN7L1
ATXN7L4_BC030616	ATXN7L4	BC030616	1	ATXN7L4_BC030616	ATXN7L4
AUH_BC020722	AUH	BC020722	1	AUH_BC020722	AUH
AUP1_BC001658	AUP1	BC001658	2	AUP1_BC001658,AUP1_BC033646	AUP1
AUP1_BC033646	AUP1	BC033646	2	AUP1_BC001658,AUP1_BC033646	AUP1
AURKAIP1_BC062333	AURKAIP1	BC062333	1	AURKAIP1_BC062333	AURKAIP1
AURKB_BC009751	AURKB	BC009751	1	AURKB_BC009751	AURKB
AVIL_BC004134	AVIL	BC004134	1	AVIL_BC004134	AVIL
AVO3_BC029608	AVO3	BC029608	1	AVO3_BC029608	AVO3
AVPI1_BC000877	AVPI1	BC000877	1	AVPI1_BC000877	AVPI1
AXIN1_BC044648	AXIN1	BC044648	1	AXIN1_BC044648	AXIN1
AXIN2_BC006295	AXIN2	BC006295	1	AXIN2_BC006295	AXIN2
AXL_BC032229	AXL	BC032229	1	AXL_BC032229	AXL
AXUD1_BC038949	AXUD1	BC038949	1	AXUD1_BC038949	AXUD1
AYP1_BC023588	AYP1	BC023588	1	AYP1_BC023588	AYP1
AZGP1_BC033830	AZGP1	BC033830	1	AZGP1_BC033830	AZGP1
AZIN1_BC013420	AZIN1	BC013420	1	AZIN1_BC013420	AZIN1
AZU1_BC069495	AZU1	BC069495	1	AZU1_BC069495	AZU1
B2M_BC032589	B2M	BC032589	1	B2M_BC032589	B2M
B3GALNT2_BC029564	B3GALNT2	BC029564	1	B3GALNT2_BC029564	B3GALNT2
B3GALT2_BC022507	B3GALT2	BC022507	1	B3GALT2_BC022507	B3GALT2
B3GALT3_BC047618	B3GALT3	BC047618	1	B3GALT3_BC047618	B3GALT3
B3GALT4_BC032574	B3GALT4	BC032574	1	B3GALT4_BC032574	B3GALT4
B3GAT3_BC007906	B3GAT3	BC007906	1	B3GAT3_BC007906	B3GAT3
B3GNT1_BC030579	B3GNT1	BC030579	1	B3GNT1_BC030579	B3GNT1
B3GNT3_BC066876	B3GNT3	BC066876	1	B3GNT3_BC066876	B3GNT3
B3GNT5_BC028058	B3GNT5	BC028058	1	B3GNT5_BC028058	B3GNT5
B3GNT6_BC021965	B3GNT6	BC021965	1	B3GNT6_BC021965	B3GNT6
B4GALT3_BC000276	B4GALT3	BC000276	2	B4GALT3_BC000276,B4GALT3_BC006099	B4GALT3
B4GALT3_BC006099	B4GALT3	BC006099	2	B4GALT3_BC000276,B4GALT3_BC006099	B4GALT3
B4GALT4_BC004523	B4GALT4	BC004523	2	B4GALT4_BC004523,B4GALT4_BC062618	B4GALT4
B4GALT4_BC062618	B4GALT4	BC062618	2	B4GALT4_BC004523,B4GALT4_BC062618	B4GALT4
B4GALT6_BC069620	B4GALT6	BC069620	1	B4GALT6_BC069620	B4GALT6
B4GALT7_BC007317	B4GALT7	BC007317	1	B4GALT7_BC007317	B4GALT7
BAALC_BC011517	BAALC	BC011517	1	BAALC_BC011517	BAALC
BAAT_BC009567	BAAT	BC009567	1	BAAT_BC009567	BAAT
BACE1_BC065492	BACE1	BC065492	1	BACE1_BC065492	BACE1
BACH1_BC063307	BACH1	BC063307	1	BACH1_BC063307	BACH1
BAD_BC001901	BAD	BC001901	1	BAD_BC001901	BAD
BAG1_BC014774	BAG1	BC014774	1	BAG1_BC014774	BAG1
BAG3_BC006418	BAG3	BC006418	2	BAG3_BC006418,BAG3_BC014656	BAG3
BAG3_BC014656	BAG3	BC014656	2	BAG3_BC006418,BAG3_BC014656	BAG3
BAG5_BC050551	BAG5	BC050551	1	BAG5_BC050551	BAG5
BAHD1_BC022782	BAHD1	BC022782	1	BAHD1_BC022782	BAHD1
BAIAP2_BC014020	BAIAP2	BC014020	2	BAIAP2_BC014020,BAIAP2_BC032559	BAIAP2
BAIAP2_BC032559	BAIAP2	BC032559	2	BAIAP2_BC014020,BAIAP2_BC032559	BAIAP2
BAIAP2L1_BC013888	BAIAP2L1	BC013888	1	BAIAP2L1_BC013888	BAIAP2L1
BAIAP2L2_BC015619	BAIAP2L2	BC015619	1	BAIAP2L2_BC015619	BAIAP2L2
BAK1_BC004431	BAK1	BC004431	1	BAK1_BC004431	BAK1
BAMBI_BC019252	BAMBI	BC019252	1	BAMBI_BC019252	BAMBI
BANF1_BC005942	BANF1	BC005942	1	BANF1_BC005942	BANF1
BANK1_BC032241	BANK1	BC032241	1	BANK1_BC032241	BANK1
BANP_BC009424	BANP	BC009424	1	BANP_BC009424	BANP
BAP1_BC001596	BAP1	BC001596	1	BAP1_BC001596	BAP1
BARX1_BC009458	BARX1	BC009458	1	BARX1_BC009458	BARX1
BAT3_BC003133	BAT3	BC003133	1	BAT3_BC003133	BAT3
BAT4_BC008783	BAT4	BC008783	1	BAT4_BC008783	BAT4
BAT5_BC031839	BAT5	BC031839	1	BAT5_BC031839	BAT5
BATF_BC032294	BATF	BC032294	1	BATF_BC032294	BATF
BAX_BC014175	BAX	BC014175	1	BAX_BC014175	BAX
BAZ2B_BC012576	BAZ2B	BC012576	1	BAZ2B_BC012576	BAZ2B
BBOX1_BC011034	BBOX1	BC011034	1	BBOX1_BC011034	BBOX1
BBS2_BC014140	BBS2	BC014140	1	BBS2_BC014140	BBS2
BBS4_BC027624	BBS4	BC027624	1	BBS4_BC027624	BBS4
BBS5_BC044593	BBS5	BC044593	1	BBS5_BC044593	BBS5
BBS7_BC032691	BBS7	BC032691	1	BBS7_BC032691	BBS7
BC002942_BC014652	BC002942	BC014652	1	BC002942_BC014652	BC002942
BC022357_BC022357	BC022357	BC022357	1	BC022357_BC022357	BC022357
BCAN_BC009117	BCAN	BC009117	2	BCAN_BC009117,BCAN_BC022938	BCAN
BCAN_BC022938	BCAN	BC022938	2	BCAN_BC009117,BCAN_BC022938	BCAN
BCAP29_BC008478	BCAP29	BC008478	1	BCAP29_BC008478	BCAP29
BCAP31_BC014323	BCAP31	BC014323	2	BCAP31_BC014323,BCAP31_BC065292	BCAP31
BCAP31_BC065292	BCAP31	BC065292	2	BCAP31_BC014323,BCAP31_BC065292	BCAP31
BCAR3_BC039895	BCAR3	BC039895	1	BCAR3_BC039895	BCAR3
BCAS2_BC005285	BCAS2	BC005285	1	BCAS2_BC005285	BCAS2
BCAS3_BC001250	BCAS3	BC001250	1	BCAS3_BC001250	BCAS3
BCAT1_BC033864	BCAT1	BC033864	1	BCAT1_BC033864	BCAT1
BCAT2_BC001900	BCAT2	BC001900	1	BCAT2_BC001900	BCAT2
BCAT2_BC004243	BCAT2	BC004243	1	BCAT2_BC004243	BCAT2
BCCIP_BC009771	BCCIP	BC009771	1	BCCIP_BC009771	BCCIP
BCDIN3_BC016396	BCDIN3	BC016396	1	BCDIN3_BC016396	BCDIN3
BCDO2_BC041656	BCDO2	BC041656	1	BCDO2_BC041656	BCDO2
BCHE_BC008396	BCHE	BC008396	1	BCHE_BC008396	BCHE
BCHE_BC018141	BCHE	BC018141	1	BCHE_BC018141	BCHE
BCKDHB_BC040139	BCKDHB	BC040139	1	BCKDHB_BC040139	BCKDHB
BCKDK_BC007363	BCKDK	BC007363	2	BCKDK_BC007363,BCKDK_BC009872	BCKDK
BCKDK_BC009872	BCKDK	BC009872	2	BCKDK_BC007363,BCKDK_BC009872	BCKDK
BCL10_BC053617	BCL10	BC053617	1	BCL10_BC053617	BCL10
BCL11A_BC021098	BCL11A	BC021098	1	BCL11A_BC021098	BCL11A
BCL2A1_BC016281	BCL2A1	BC016281	1	BCL2A1_BC016281	BCL2A1
BCL2L11_BC033694	BCL2L11	BC033694	1	BCL2L11_BC033694	BCL2L11
BCL2L12_BC007724	BCL2L12	BC007724	1	BCL2L12_BC007724	BCL2L12
BCL2L13_BC003032	BCL2L13	BC003032	1	BCL2L13_BC003032	BCL2L13
BCL2L13_BC007658	BCL2L13	BC007658	1	BCL2L13_BC007658	BCL2L13
BCL2L14_BC025778	BCL2L14	BC025778	1	BCL2L14_BC025778	BCL2L14
BCL2L1_BC019307	BCL2L1	BC019307	1	BCL2L1_BC019307	BCL2L1
BCL6B_BC059404	BCL6B	BC059404	1	BCL6B_BC059404	BCL6B
BCL7B_BC009548	BCL7B	BC009548	1	BCL7B_BC009548	BCL7B
BCL7C_BC019071	BCL7C	BC019071	2	BCL7C_BC019071,BCL7C_BC058863	BCL7C
BCL7C_BC058863	BCL7C	BC058863	2	BCL7C_BC019071,BCL7C_BC058863	BCL7C
BCMP11_BC058284	BCMP11	BC058284	1	BCMP11_BC058284	BCMP11
BCOR_BC063536	BCOR	BC063536	1	BCOR_BC063536	BCOR
BCS1L_BC000416	BCS1L	BC000416	1	BCS1L_BC000416	BCS1L
BDH_BC011964	BDH	BC011964	1	BDH_BC011964	BDH
BDKRB1_BC034705	BDKRB1	BC034705	1	BDKRB1_BC034705	BDKRB1
BDNF_BC029795	BDNF	BC029795	1	BDNF_BC029795	BDNF
BET1_BC000899	BET1	BC000899	2	BET1_BC000899,BET1_BC012595	BET1
BET1_BC012595	BET1	BC012595	2	BET1_BC000899,BET1_BC012595	BET1
BEX2_BC015522	BEX2	BC015522	1	BEX2_BC015522	BEX2
BFAR_BC003054	BFAR	BC003054	1	BFAR_BC003054	BFAR
BF_BC007990	BF	BC007990	1	BF_BC007990	BF
BFSP1_BC041483	BFSP1	BC041483	1	BFSP1_BC041483	BFSP1
BGN_BC004244	BGN	BC004244	1	BGN_BC004244	BGN
BHLHB2_BC082238	BHLHB2	BC082238	1	BHLHB2_BC082238	BHLHB2
BHMT2_BC020665	BHMT2	BC020665	1	BHMT2_BC020665	BHMT2
BHMT_BC012616	BHMT	BC012616	1	BHMT_BC012616	BHMT
BID_BC009197	BID	BC009197	2	BID_BC009197,BID_BC022072	BID
BID_BC022072	BID	BC022072	2	BID_BC009197,BID_BC022072	BID
BIK_BC001599	BIK	BC001599	1	BIK_BC001599	BIK
BIN1_BC004101	BIN1	BC004101	1	BIN1_BC004101	BIN1
BIN2_BC047686	BIN2	BC047686	1	BIN2_BC047686	BIN2
BIN3_BC001223	BIN3	BC001223	1	BIN3_BC001223	BIN3
BIN3_BC009824	BIN3	BC009824	1	BIN3_BC009824	BIN3
BIRC2_BC016174	BIRC2	BC016174	1	BIRC2_BC016174	BIRC2
BIRC3_BC037420	BIRC3	BC037420	1	BIRC3_BC037420	BIRC3
BIRC4_BC032729	BIRC4	BC032729	1	BIRC4_BC032729	BIRC4
BIRC5_BC007606	BIRC5	BC007606	1	BIRC5_BC007606	BIRC5
BIRC5_BC008718	BIRC5	BC008718	1	BIRC5_BC008718	BIRC5
BIRC7_BC014475	BIRC7	BC014475	1	BIRC7_BC014475	BIRC7
BIRC8_BC039318	BIRC8	BC039318	1	BIRC8_BC039318	BIRC8
BIRC8_BC071665	BIRC8	BC071665	1	BIRC8_BC071665	BIRC8
BIT1_BC006807	BIT1	BC006807	1	BIT1_BC006807	BIT1
BLCAP_BC047692	BLCAP	BC047692	1	BLCAP_BC047692	BLCAP
Bles03_BC010512	Bles03	BC010512	1	Bles03_BC010512	Bles03
BLK_BC007371	BLK	BC007371	1	BLK_BC007371	BLK
BLMH_BC003616	BLMH	BC003616	1	BLMH_BC003616	BLMH
BLNK_BC018906	BLNK	BC018906	1	BLNK_BC018906	BLNK
BLOC1S2_BC020494	BLOC1S2	BC020494	1	BLOC1S2_BC020494	BLOC1S2
BLVRA_BC005902	BLVRA	BC005902	2	BLVRA_BC005902,BLVRA_BC008456	BLVRA
BLVRA_BC008456	BLVRA	BC008456	2	BLVRA_BC005902,BLVRA_BC008456	BLVRA
BLZF1_BC020716	BLZF1	BC020716	1	BLZF1_BC020716	BLZF1
BM039_BC008972	BM039	BC008972	1	BM039_BC008972	BM039
BMF_BC069328	BMF	BC069328	2	BMF_BC069328,BMF_BC069505	BMF
BMF_BC069505	BMF	BC069505	2	BMF_BC069328,BMF_BC069505	BMF
BMP4_BC020546	BMP4	BC020546	1	BMP4_BC020546	BMP4
BMP5_BC027958	BMP5	BC027958	1	BMP5_BC027958	BMP5
BMP7_BC004248	BMP7	BC004248	2	BMP7_BC004248,BMP7_BC008584	BMP7
BMP7_BC008584	BMP7	BC008584	2	BMP7_BC004248,BMP7_BC008584	BMP7
BMPR1A_BC028383	BMPR1A	BC028383	1	BMPR1A_BC028383	BMPR1A
BMPR1B_BC047773	BMPR1B	BC047773	1	BMPR1B_BC047773	BMPR1B
BMPR2_BC052985	BMPR2	BC052985	1	BMPR2_BC052985	BMPR2
BMX_BC016652	BMX	BC016652	1	BMX_BC016652	BMX
BNIP1_BC010959	BNIP1	BC010959	1	BNIP1_BC010959	BNIP1
BNIP2_BC002461	BNIP2	BC002461	1	BNIP2_BC002461	BNIP2
BNIP3_BC021989	BNIP3	BC021989	1	BNIP3_BC021989	BNIP3
BNIP3L_BC001559	BNIP3L	BC001559	1	BNIP3L_BC001559	BNIP3L
BOC_BC034614	BOC	BC034614	1	BOC_BC034614	BOC
BOLA1_BC063405	BOLA1	BC063405	1	BOLA1_BC063405	BOLA1
BOLA2_BC062756	BOLA2	BC062756	1	BOLA2_BC062756	BOLA2
BOLL_BC033674	BOLL	BC033674	1	BOLL_BC033674	BOLL
BOP1_BC013787	BOP1	BC013787	1	BOP1_BC013787	BOP1
BPGM_BC017050	BPGM	BC017050	1	BPGM_BC017050	BPGM
BPI_BC040955	BPI	BC040955	1	BPI_BC040955	BPI
BPIL1_BC034415	BPIL1	BC034415	1	BPIL1_BC034415	BPIL1
BRCA1_BC072418	BRCA1	BC072418	1	BRCA1_BC072418	BRCA1
BRD2_BC063840	BRD2	BC063840	1	BRD2_BC063840	BRD2
BRD7_BC050728	BRD7	BC050728	1	BRD7_BC050728	BRD7
BRD8_BC008039	BRD8	BC008039	1	BRD8_BC008039	BRD8
BRD9_BC041590	BRD9	BC041590	1	BRD9_BC041590	BRD9
BRDG1_BC014958	BRDG1	BC014958	1	BRDG1_BC014958	BRDG1
BRE_BC001251	BRE	BC001251	1	BRE_BC001251	BRE
BRF1_BC016743	BRF1	BC016743	1	BRF1_BC016743	BRF1
BRF2_BC010648	BRF2	BC010648	1	BRF2_BC010648	BRF2
BRI3_BC018737	BRI3	BC018737	1	BRI3_BC018737	BRI3
BRMS1_BC009834	BRMS1	BC009834	1	BRMS1_BC009834	BRMS1
BRMS1L_BC006250	BRMS1L	BC006250	1	BRMS1L_BC006250	BRMS1L
BRP44L_BC000810	BRP44L	BC000810	1	BRP44L_BC000810	BRP44L
BRRN1_BC024211	BRRN1	BC024211	1	BRRN1_BC024211	BRRN1
BRSK1_BC016681	BRSK1	BC016681	1	BRSK1_BC016681	BRSK1
BRUNOL5_BC028101	BRUNOL5	BC028101	2	BRUNOL5_BC028101,BRUNOL5_BC047522	BRUNOL5
BRUNOL5_BC047522	BRUNOL5	BC047522	2	BRUNOL5_BC028101,BRUNOL5_BC047522	BRUNOL5
BRUNOL6_BC033838	BRUNOL6	BC033838	1	BRUNOL6_BC033838	BRUNOL6
BSCL2_BC004911	BSCL2	BC004911	3	BSCL2_BC004911,BSCL2_BC012140,BSCL2_BC041640	BSCL2
BSCL2_BC009866	BSCL2	BC009866	1	BSCL2_BC009866	BSCL2
BSCL2_BC012140	BSCL2	BC012140	3	BSCL2_BC004911,BSCL2_BC012140,BSCL2_BC041640	BSCL2
BSCL2_BC041640	BSCL2	BC041640	3	BSCL2_BC004911,BSCL2_BC012140,BSCL2_BC041640	BSCL2
BSG_BC009040	BSG	BC009040	1	BSG_BC009040	BSG
BSND_BC069510	BSND	BC069510	1	BSND_BC069510	BSND
BST2_BC033873	BST2	BC033873	1	BST2_BC033873	BST2
BTBD10_BC005071	BTBD10	BC005071	1	BTBD10_BC005071	BTBD10
BTBD12_BC036335	BTBD12	BC036335	1	BTBD12_BC036335	BTBD12
BTBD15_BC030580	BTBD15	BC030580	3	BTBD15_BC030580,BTBD15_BC049375,BTBD15_BC071729	BTBD15
BTBD15_BC049375	BTBD15	BC049375	3	BTBD15_BC030580,BTBD15_BC049375,BTBD15_BC071729	BTBD15
BTBD15_BC071729	BTBD15	BC071729	3	BTBD15_BC030580,BTBD15_BC049375,BTBD15_BC071729	BTBD15
BTBD1_BC028097	BTBD1	BC028097	1	BTBD1_BC028097	BTBD1
BTBD4_BC052269	BTBD4	BC052269	1	BTBD4_BC052269	BTBD4
BTBD5_BC057794	BTBD5	BC057794	1	BTBD5_BC057794	BTBD5
BTC_BC011618	BTC	BC011618	1	BTC_BC011618	BTC
BTD_BC012099	BTD	BC012099	1	BTD_BC012099	BTD
BTF3_BC008062	BTF3	BC008062	1	BTF3_BC008062	BTF3
BTF3L4_BC022371	BTF3L4	BC022371	1	BTF3L4_BC022371	BTF3L4
BTG1_BC016759	BTG1	BC016759	1	BTG1_BC016759	BTG1
BTG3_BC011957	BTG3	BC011957	1	BTG3_BC011957	BTG3
BTG4_BC031045	BTG4	BC031045	1	BTG4_BC031045	BTG4
BTN2A1_BC016661	BTN2A1	BC016661	1	BTN2A1_BC016661	BTN2A1
BTN2A2_BC014021	BTN2A2	BC014021	2	BTN2A2_BC014021,BTN2A2_BC017497	BTN2A2
BTN2A2_BC017497	BTN2A2	BC017497	2	BTN2A2_BC014021,BTN2A2_BC017497	BTN2A2
BTN3A2_BC002832	BTN3A2	BC002832	1	BTN3A2_BC002832	BTN3A2
BTN3A3_BC015815	BTN3A3	BC015815	1	BTN3A3_BC015815	BTN3A3
BTNL9_BC062459	BTNL9	BC062459	1	BTNL9_BC062459	BTNL9
BTRC_BC027994	BTRC	BC027994	1	BTRC_BC027994	BTRC
BUB1B_BC018739	BUB1B	BC018739	1	BUB1B_BC018739	BUB1B
BUB1_BC028201	BUB1	BC028201	1	BUB1_BC028201	BUB1
BUB3_BC005138	BUB3	BC005138	2	BUB3_BC005138,BUB3_BC022438	BUB3
BUB3_BC022438	BUB3	BC022438	2	BUB3_BC005138,BUB3_BC022438	BUB3
BVES_BC034425	BVES	BC034425	1	BVES_BC034425	BVES
BVES_BC040502	BVES	BC040502	1	BVES_BC040502	BVES
BXDC1_BC035314	BXDC1	BC035314	1	BXDC1_BC035314	BXDC1
BXDC5_BC016051	BXDC5	BC016051	1	BXDC5_BC016051	BXDC5
BYSL_BC007340	BYSL	BC007340	1	BYSL_BC007340	BYSL
BYSL_BC050645	BYSL	BC050645	1	BYSL_BC050645	BYSL
BZRP_BC001110	BZRP	BC001110	1	BZRP_BC001110	BZRP
BZW1_BC001804	BZW1	BC001804	2	BZW1_BC001804,BZW1_BC026303	BZW1
BZW1_BC026303	BZW1	BC026303	2	BZW1_BC001804,BZW1_BC026303	BZW1
BZW2_BC003056	BZW2	BC003056	2	BZW2_BC003056,BZW2_BC008453	BZW2
BZW2_BC008453	BZW2	BC008453	2	BZW2_BC003056,BZW2_BC008453	BZW2
C10orf104_BC009530	C10orf104	BC009530	1	C10orf104_BC009530	C10orf104
C10orf107_BC041932	C10orf107	BC041932	1	C10orf107_BC041932	C10orf107
C10orf10_BC011402	C10orf10	BC011402	1	C10orf10_BC011402	C10orf10
C10orf111_BC029034	C10orf111	BC029034	1	C10orf111_BC029034	C10orf111
C10orf116_BC004471	C10orf116	BC004471	1	C10orf116_BC004471	C10orf116
C10orf118_BC030557	C10orf118	BC030557	1	C10orf118_BC030557	C10orf118
C10orf119_BC004183	C10orf119	BC004183	1	C10orf119_BC004183	C10orf119
C10orf12_BC024315	C10orf12	BC024315	1	C10orf12_BC024315	C10orf12
C10orf130_BC075861	C10orf130	BC075861	1	C10orf130_BC075861	C10orf130
C10orf137_BC016903	C10orf137	BC016903	1	C10orf137_BC016903	C10orf137
C10orf18_BC001759	C10orf18	BC001759	1	C10orf18_BC001759	C10orf18
C10orf28_BC047908	C10orf28	BC047908	1	C10orf28_BC047908	C10orf28
C10orf30_BC031618	C10orf30	BC031618	1	C10orf30_BC031618	C10orf30
C10orf32_BC015994	C10orf32	BC015994	1	C10orf32_BC015994	C10orf32
C10orf33_BC006131	C10orf33	BC006131	1	C10orf33_BC006131	C10orf33
C10orf35_BC013587	C10orf35	BC013587	1	C10orf35_BC013587	C10orf35
C10orf3_BC008947	C10orf3	BC008947	1	C10orf3_BC008947	C10orf3
C10orf42_BC034235	C10orf42	BC034235	1	C10orf42_BC034235	C10orf42
C10orf45_BC004872	C10orf45	BC004872	1	C10orf45_BC004872	C10orf45
C10orf46_BC038294	C10orf46	BC038294	1	C10orf46_BC038294	C10orf46
C10orf47_BC017269	C10orf47	BC017269	1	C10orf47_BC017269	C10orf47
C10orf48_BC036207	C10orf48	BC036207	1	C10orf48_BC036207	C10orf48
C10orf49_BC018068	C10orf49	BC018068	1	C10orf49_BC018068	C10orf49
C10orf4_BC018007	C10orf4	BC018007	1	C10orf4_BC018007	C10orf4
C10orf53_BC028127	C10orf53	BC028127	1	C10orf53_BC028127	C10orf53
C10orf54_BC020568	C10orf54	BC020568	1	C10orf54_BC020568	C10orf54
C10orf56_BC028617	C10orf56	BC028617	1	C10orf56_BC028617	C10orf56
C10orf58_BC005871	C10orf58	BC005871	1	C10orf58_BC005871	C10orf58
C10orf59_BC005364	C10orf59	BC005364	1	C10orf59_BC005364	C10orf59
C10orf61_BC009494	C10orf61	BC009494	1	C10orf61_BC009494	C10orf61
C10orf61_BC068449	C10orf61	BC068449	1	C10orf61_BC068449	C10orf61
C10orf62_BC037252	C10orf62	BC037252	1	C10orf62_BC037252	C10orf62
C10orf63_BC026165	C10orf63	BC026165	1	C10orf63_BC026165	C10orf63
C10orf64_BC034937	C10orf64	BC034937	1	C10orf64_BC034937	C10orf64
C10orf65_BC011916	C10orf65	BC011916	3	C10orf65_BC011916,C10orf65_BC045550,C10orf65_BC057821	C10orf65
C10orf65_BC045550	C10orf65	BC045550	3	C10orf65_BC011916,C10orf65_BC045550,C10orf65_BC057821	C10orf65
C10orf65_BC057821	C10orf65	BC057821	3	C10orf65_BC011916,C10orf65_BC045550,C10orf65_BC057821	C10orf65
C10orf70_BC007043	C10orf70	BC007043	1	C10orf70_BC007043	C10orf70
C10orf74_BC068557	C10orf74	BC068557	1	C10orf74_BC068557	C10orf74
C10orf77_BC057787	C10orf77	BC057787	1	C10orf77_BC057787	C10orf77
C10orf78_BC020892	C10orf78	BC020892	1	C10orf78_BC020892	C10orf78
C10orf78_BC043256	C10orf78	BC043256	1	C10orf78_BC043256	C10orf78
C10orf81_BC036365	C10orf81	BC036365	1	C10orf81_BC036365	C10orf81
C10orf82_BC021737	C10orf82	BC021737	1	C10orf82_BC021737	C10orf82
C10orf83_BC010230	C10orf83	BC010230	2	C10orf83_BC010230,C10orf83_BC022054	C10orf83
C10orf83_BC022054	C10orf83	BC022054	2	C10orf83_BC010230,C10orf83_BC022054	C10orf83
C10orf84_BC023577	C10orf84	BC023577	1	C10orf84_BC023577	C10orf84
C10orf86_BC005212	C10orf86	BC005212	1	C10orf86_BC005212	C10orf86
C10orf88_BC032645	C10orf88	BC032645	1	C10orf88_BC032645	C10orf88
C10orf89_BC035344	C10orf89	BC035344	1	C10orf89_BC035344	C10orf89
C10orf91_BC030794	C10orf91	BC030794	1	C10orf91_BC030794	C10orf91
C10orf93_BC044661	C10orf93	BC044661	1	C10orf93_BC044661	C10orf93
C10orf96_BC044830	C10orf96	BC044830	1	C10orf96_BC044830	C10orf96
C10orf97_BC020605	C10orf97	BC020605	2	C10orf97_BC020605,C10orf97_BC067799	C10orf97
C10orf97_BC067799	C10orf97	BC067799	2	C10orf97_BC020605,C10orf97_BC067799	C10orf97
C11orf16_BC027865	C11orf16	BC027865	1	C11orf16_BC027865	C11orf16
C11orf17_BC030996	C11orf17	BC030996	1	C11orf17_BC030996	C11orf17
C11orf1_BC020628	C11orf1	BC020628	1	C11orf1_BC020628	C11orf1
C11orf24_BC011765	C11orf24	BC011765	1	C11orf24_BC011765	C11orf24
C11orf30_BC029375	C11orf30	BC029375	1	C11orf30_BC029375	C11orf30
C11orf31_BC021122	C11orf31	BC021122	1	C11orf31_BC021122	C11orf31
C11orf71_BC071695	C11orf71	BC071695	2	C11orf71_BC071695,FLJ20010_BC009041	C11orf71,FLJ20010
C12orf10_BC028904	C12orf10	BC028904	1	C12orf10_BC028904	C12orf10
C12orf10_BC051871	C12orf10	BC051871	1	C12orf10_BC051871	C12orf10
C12orf11_BC003081	C12orf11	BC003081	2	C12orf11_BC003081,C12orf11_BC008368	C12orf11
C12orf11_BC008368	C12orf11	BC008368	2	C12orf11_BC003081,C12orf11_BC008368	C12orf11
C12orf12_BC034491	C12orf12	BC034491	1	C12orf12_BC034491	C12orf12
C12orf22_BC017221	C12orf22	BC017221	1	C12orf22_BC017221	C12orf22
C12orf4_BC016908	C12orf4	BC016908	1	C12orf4_BC016908	C12orf4
C12orf5_BC012340	C12orf5	BC012340	1	C12orf5_BC012340	C12orf5
C13orf10_BC000791	C13orf10	BC000791	1	C13orf10_BC000791	C13orf10
C13orf12_BC003390	C13orf12	BC003390	1	C13orf12_BC003390	C13orf12
C13orf18_BC032311	C13orf18	BC032311	1	C13orf18_BC032311	C13orf18
C13orf18_BC043488	C13orf18	BC043488	1	C13orf18_BC043488	C13orf18
C13orf1_BC022519	C13orf1	BC022519	1	C13orf1_BC022519	C13orf1
C13orf21_BC029067	C13orf21	BC029067	1	C13orf21_BC029067	C13orf21
C13orf22_BC038103	C13orf22	BC038103	1	C13orf22_BC038103	C13orf22
C13orf3_BC013418	C13orf3	BC013418	1	C13orf3_BC013418	C13orf3
C13orf3_BC048988	C13orf3	BC048988	1	C13orf3_BC048988	C13orf3
C13orf6_BC022566	C13orf6	BC022566	1	C13orf6_BC022566	C13orf6
C13orf7_BC028586	C13orf7	BC028586	1	C13orf7_BC028586	C13orf7
C14orf100_BC005198	C14orf100	BC005198	1	C14orf100_BC005198	C14orf100
C14orf100_BC010359	C14orf100	BC010359	1	C14orf100_BC010359	C14orf100
C14orf103_BC015016	C14orf103	BC015016	1	C14orf103_BC015016	C14orf103
C14orf104_BC011400	C14orf104	BC011400	1	C14orf104_BC011400	C14orf104
C14orf108_BC013174	C14orf108	BC013174	1	C14orf108_BC013174	C14orf108
C14orf10_BC010293	C14orf10	BC010293	1	C14orf10_BC010293	C14orf10
C14orf10_BC063438	C14orf10	BC063438	1	C14orf10_BC063438	C14orf10
C14orf111_BC080600	C14orf111	BC080600	1	C14orf111_BC080600	C14orf111
C14orf112_BC001702	C14orf112	BC001702	1	C14orf112_BC001702	C14orf112
C14orf114_BC001962	C14orf114	BC001962	1	C14orf114_BC001962	C14orf114
C14orf115_BC053325	C14orf115	BC053325	1	C14orf115_BC053325	C14orf115
C14orf118_BC058032	C14orf118	BC058032	1	C14orf118_BC058032	C14orf118
C14orf11_BC001245	C14orf11	BC001245	1	C14orf11_BC001245	C14orf11
C14orf120_BC030817	C14orf120	BC030817	1	C14orf120_BC030817	C14orf120
C14orf122_BC002491	C14orf122	BC002491	1	C14orf122_BC002491	C14orf122
C14orf125_BC062720	C14orf125	BC062720	1	C14orf125_BC062720	C14orf125
C14orf126_BC010618	C14orf126	BC010618	1	C14orf126_BC010618	C14orf126
C14orf128_BC007251	C14orf128	BC007251	1	C14orf128_BC007251	C14orf128
C14orf129_BC004818	C14orf129	BC004818	1	C14orf129_BC004818	C14orf129
C14orf130_BC015046	C14orf130	BC015046	1	C14orf130_BC015046	C14orf130
C14orf131_BC006222	C14orf131	BC006222	1	C14orf131_BC006222	C14orf131
C14orf132_BC042922	C14orf132	BC042922	1	C14orf132_BC042922	C14orf132
C14orf133_BC015054	C14orf133	BC015054	1	C14orf133_BC015054	C14orf133
C14orf135_BC033843	C14orf135	BC033843	1	C14orf135_BC033843	C14orf135
C14orf139_BC008299	C14orf139	BC008299	1	C14orf139_BC008299	C14orf139
C14orf140_BC004259	C14orf140	BC004259	1	C14orf140_BC004259	C14orf140
C14orf147_BC016805	C14orf147	BC016805	2	C14orf147_BC016805,C14orf147_BC021701	C14orf147
C14orf147_BC021701	C14orf147	BC021701	2	C14orf147_BC016805,C14orf147_BC021701	C14orf147
C14orf148_BC066965	C14orf148	BC066965	1	C14orf148_BC066965	C14orf148
C14orf149_BC012131	C14orf149	BC012131	1	C14orf149_BC012131	C14orf149
C14orf150_BC010698	C14orf150	BC010698	1	C14orf150_BC010698	C14orf150
C14orf151_BC006173	C14orf151	BC006173	1	C14orf151_BC006173	C14orf151
C14orf152_BC009073	C14orf152	BC009073	1	C14orf152_BC009073	C14orf152
C14orf154_BC009054	C14orf154	BC009054	1	C14orf154_BC009054	C14orf154
C14orf154_BC066931	C14orf154	BC066931	1	C14orf154_BC066931	C14orf154
C14orf155_BC039878	C14orf155	BC039878	1	C14orf155_BC039878	C14orf155
C14orf156_BC017895	C14orf156	BC017895	1	C14orf156_BC017895	C14orf156
C14orf159_BC009182	C14orf159	BC009182	2	C14orf159_BC009182,C14orf159_BC010614	C14orf159
C14orf159_BC010614	C14orf159	BC010614	2	C14orf159_BC009182,C14orf159_BC010614	C14orf159
C14orf166_BC001722	C14orf166	BC001722	1	C14orf166_BC001722	C14orf166
C14orf168_BC005343	C14orf168	BC005343	1	C14orf168_BC005343	C14orf168
C14orf172_BC010167	C14orf172	BC010167	1	C14orf172_BC010167	C14orf172
C14orf1_BC002444	C14orf1	BC002444	1	C14orf1_BC002444	C14orf1
C14orf24_BC029559	C14orf24	BC029559	1	C14orf24_BC029559	C14orf24
C14orf29_BC034603	C14orf29	BC034603	1	C14orf29_BC034603	C14orf29
C14orf32_BC015621	C14orf32	BC015621	1	C14orf32_BC015621	C14orf32
C14orf48_BC021728	C14orf48	BC021728	1	C14orf48_BC021728	C14orf48
c14orf49_BC061899	c14orf49	BC061899	1	c14orf49_BC061899	c14orf49
C14orf54_BC050401	C14orf54	BC050401	1	C14orf54_BC050401	C14orf54
C14orf58_BC019087	C14orf58	BC019087	1	C14orf58_BC019087	C14orf58
C14orf65_BC031990	C14orf65	BC031990	1	C14orf65_BC031990	C14orf65
C14orf78_BC049216	C14orf78	BC049216	1	C14orf78_BC049216	C14orf78
C14orf79_BC011537	C14orf79	BC011537	1	C14orf79_BC011537	C14orf79
C14orf80_BC016028	C14orf80	BC016028	1	C14orf80_BC016028	C14orf80
C14orf8_BC038970	C14orf8	BC038970	1	C14orf8_BC038970	C14orf8
C14orf92_BC013689	C14orf92	BC013689	1	C14orf92_BC013689	C14orf92
C14orf93_BC014299	C14orf93	BC014299	1	C14orf93_BC014299	C14orf93
C14orf94_BC001916	C14orf94	BC001916	1	C14orf94_BC001916	C14orf94
C15orf15_BC005344	C15orf15	BC005344	7	C15orf15_BC005344,C15orf15_BC008409,C15orf15_BC008499,C15orf15_BC009604,C15orf15_BC014576,C15orf15_BC016312,C15orf15_BC028672	C15orf15
C15orf15_BC008409	C15orf15	BC008409	7	C15orf15_BC005344,C15orf15_BC008409,C15orf15_BC008499,C15orf15_BC009604,C15orf15_BC014576,C15orf15_BC016312,C15orf15_BC028672	C15orf15
C15orf15_BC008499	C15orf15	BC008499	7	C15orf15_BC005344,C15orf15_BC008409,C15orf15_BC008499,C15orf15_BC009604,C15orf15_BC014576,C15orf15_BC016312,C15orf15_BC028672	C15orf15
C15orf15_BC009604	C15orf15	BC009604	7	C15orf15_BC005344,C15orf15_BC008409,C15orf15_BC008499,C15orf15_BC009604,C15orf15_BC014576,C15orf15_BC016312,C15orf15_BC028672	C15orf15
C15orf15_BC012913	C15orf15	BC012913	1	C15orf15_BC012913	C15orf15
C15orf15_BC014576	C15orf15	BC014576	7	C15orf15_BC005344,C15orf15_BC008409,C15orf15_BC008499,C15orf15_BC009604,C15orf15_BC014576,C15orf15_BC016312,C15orf15_BC028672	C15orf15
C15orf15_BC016312	C15orf15	BC016312	7	C15orf15_BC005344,C15orf15_BC008409,C15orf15_BC008499,C15orf15_BC009604,C15orf15_BC014576,C15orf15_BC016312,C15orf15_BC028672	C15orf15
C15orf15_BC028672	C15orf15	BC028672	7	C15orf15_BC005344,C15orf15_BC008409,C15orf15_BC008499,C15orf15_BC009604,C15orf15_BC014576,C15orf15_BC016312,C15orf15_BC028672	C15orf15
C15orf29_BC026234	C15orf29	BC026234	1	C15orf29_BC026234	C15orf29
C16orf30_BC004932	C16orf30	BC004932	1	C16orf30_BC004932	C16orf30
C16orf33_BC009179	C16orf33	BC009179	1	C16orf33_BC009179	C16orf33
C16orf34_BC014438	C16orf34	BC014438	1	C16orf34_BC014438	C16orf34
C16orf35_BC004185	C16orf35	BC004185	1	C16orf35_BC004185	C16orf35
C16orf44_BC032400	C16orf44	BC032400	2	C16orf44_BC032400,C16orf44_BC033821	C16orf44
C16orf44_BC033821	C16orf44	BC033821	2	C16orf44_BC032400,C16orf44_BC033821	C16orf44
C16orf45_BC008967	C16orf45	BC008967	1	C16orf45_BC008967	C16orf45
C16orf48_BC008284	C16orf48	BC008284	1	C16orf48_BC008284	C16orf48
C16orf49_BC064946	C16orf49	BC064946	1	C16orf49_BC064946	C16orf49
C16orf51_BC015912	C16orf51	BC015912	1	C16orf51_BC015912	C16orf51
C16orf52_BC027604	C16orf52	BC027604	1	C16orf52_BC027604	C16orf52
C16orf53_BC003640	C16orf53	BC003640	1	C16orf53_BC003640	C16orf53
C16orf5_BC002882	C16orf5	BC002882	1	C16orf5_BC002882	C16orf5
C17orf25_BC008605	C17orf25	BC008605	2	C17orf25_BC008605,C17orf25_BC015848	C17orf25
C17orf25_BC015848	C17orf25	BC015848	2	C17orf25_BC008605,C17orf25_BC015848	C17orf25
C17orf27_BC032220	C17orf27	BC032220	1	C17orf27_BC032220	C17orf27
C17orf28_BC035372	C17orf28	BC035372	1	C17orf28_BC035372	C17orf28
C17orf31_BC064916	C17orf31	BC064916	1	C17orf31_BC064916	C17orf31
C17orf32_BC033113	C17orf32	BC033113	1	C17orf32_BC033113	C17orf32
C17orf37_BC006006	C17orf37	BC006006	1	C17orf37_BC006006	C17orf37
C17orf40_BC035325	C17orf40	BC035325	1	C17orf40_BC035325	C17orf40
C17orf42_BC024328	C17orf42	BC024328	1	C17orf42_BC024328	C17orf42
C18orf10_BC015178	C18orf10	BC015178	2	C18orf10_BC015178,C18orf10_BC022199	C18orf10
C18orf10_BC022199	C18orf10	BC022199	2	C18orf10_BC015178,C18orf10_BC022199	C18orf10
C18orf14_BC056269	C18orf14	BC056269	1	C18orf14_BC056269	C18orf14
C18orf18_BC010538	C18orf18	BC010538	1	C18orf18_BC010538	C18orf18
C18orf19_BC022410	C18orf19	BC022410	1	C18orf19_BC022410	C18orf19
C18orf1_BC030199	C18orf1	BC030199	1	C18orf1_BC030199	C18orf1
C18orf1_BC066971	C18orf1	BC066971	1	C18orf1_BC066971	C18orf1
C18orf20_BC029565	C18orf20	BC029565	1	C18orf20_BC029565	C18orf20
C18orf21_BC025950	C18orf21	BC025950	1	C18orf21_BC025950	C18orf21
C18orf22_BC014195	C18orf22	BC014195	1	C18orf22_BC014195	C18orf22
C18orf24_BC015706	C18orf24	BC015706	1	C18orf24_BC015706	C18orf24
C18orf25_BC016149	C18orf25	BC016149	1	C18orf25_BC016149	C18orf25
C18orf37_BC048989	C18orf37	BC048989	1	C18orf37_BC048989	C18orf37
C18orf43_BC007528	C18orf43	BC007528	1	C18orf43_BC007528	C18orf43
C18orf45_BC006280	C18orf45	BC006280	1	C18orf45_BC006280	C18orf45
C18orf54_BC036054	C18orf54	BC036054	1	C18orf54_BC036054	C18orf54
C18orf55_BC000892	C18orf55	BC000892	1	C18orf55_BC000892	C18orf55
C18orf56_BC028301	C18orf56	BC028301	1	C18orf56_BC028301	C18orf56
C18orf8_BC002950	C18orf8	BC002950	1	C18orf8_BC002950	C18orf8
C18orf9_BC026307	C18orf9	BC026307	1	C18orf9_BC026307	C18orf9
C19orf10_BC010129	C19orf10	BC010129	1	C19orf10_BC010129	C19orf10
C19orf12_BC063518	C19orf12	BC063518	1	C19orf12_BC063518	C19orf12
C19orf16_BC031875	C19orf16	BC031875	1	C19orf16_BC031875	C19orf16
C19orf23_BC026041	C19orf23	BC026041	1	C19orf23_BC026041	C19orf23
C19orf25_BC018441	C19orf25	BC018441	1	C19orf25_BC018441	C19orf25
C19orf27_BC000158	C19orf27	BC000158	3	C19orf27_BC000158,C19orf27_BC009256,C19orf27_BC020512	C19orf27
C19orf27_BC009256	C19orf27	BC009256	3	C19orf27_BC000158,C19orf27_BC009256,C19orf27_BC020512	C19orf27
C19orf27_BC020512	C19orf27	BC020512	3	C19orf27_BC000158,C19orf27_BC009256,C19orf27_BC020512	C19orf27
C19orf28_BC036706	C19orf28	BC036706	1	C19orf28_BC036706	C19orf28
C19orf32_BC008201	C19orf32	BC008201	1	C19orf32_BC008201	C19orf32
C19orf33_BC060319	C19orf33	BC060319	1	C19orf33_BC060319	C19orf33
C19orf34_BC029585	C19orf34	BC029585	1	C19orf34_BC029585	C19orf34
C19orf36_BC014609	C19orf36	BC014609	1	C19orf36_BC014609	C19orf36
C19orf4_BC010446	C19orf4	BC010446	1	C19orf4_BC010446	C19orf4
C19orf6_BC008957	C19orf6	BC008957	1	C19orf6_BC008957	C19orf6
C19orf9_BC021822	C19orf9	BC021822	1	C19orf9_BC021822	C19orf9
C1D_BC005235	C1D	BC005235	2	C1D_BC005235,C1D_BC016284	C1D
C1D_BC016284	C1D	BC016284	2	C1D_BC005235,C1D_BC016284	C1D
C1GALT1C1_BC011930	C1GALT1C1	BC011930	1	C1GALT1C1_BC011930	C1GALT1C1
C1orf101_BC032859	C1orf101	BC032859	1	C1orf101_BC032859	C1orf101
C1orf102_BC018069	C1orf102	BC018069	1	C1orf102_BC018069	C1orf102
C1orf103_BC008115	C1orf103	BC008115	1	C1orf103_BC008115	C1orf103
C1orf105_BC038410	C1orf105	BC038410	1	C1orf105_BC038410	C1orf105
C1orf107_BC022964	C1orf107	BC022964	1	C1orf107_BC022964	C1orf107
C1orf109_BC018109	C1orf109	BC018109	2	C1orf109_BC018109,C1orf109_BC063843	C1orf109
C1orf109_BC063843	C1orf109	BC063843	2	C1orf109_BC018109,C1orf109_BC063843	C1orf109
C1orf110_BC040018	C1orf110	BC040018	1	C1orf110_BC040018	C1orf110
C1orf111_BC032957	C1orf111	BC032957	1	C1orf111_BC032957	C1orf111
C1orf114_BC026073	C1orf114	BC026073	1	C1orf114_BC026073	C1orf114
C1orf116_BC000765	C1orf116	BC000765	1	C1orf116_BC000765	C1orf116
C1orf116_BC001943	C1orf116	BC001943	1	C1orf116_BC001943	C1orf116
C1orf117_BC016848	C1orf117	BC016848	2	C1orf117_BC016848,C1orf117_BC037394	C1orf117
C1orf117_BC037394	C1orf117	BC037394	2	C1orf117_BC016848,C1orf117_BC037394	C1orf117
C1orf123_BC010908	C1orf123	BC010908	1	C1orf123_BC010908	C1orf123
C1orf124_BC015740	C1orf124	BC015740	2	C1orf124_BC015740,C1orf124_BC068478	C1orf124
C1orf124_BC068478	C1orf124	BC068478	2	C1orf124_BC015740,C1orf124_BC068478	C1orf124
C1orf128_BC017208	C1orf128	BC017208	1	C1orf128_BC017208	C1orf128
C1orf131_BC036800	C1orf131	BC036800	1	C1orf131_BC036800	C1orf131
C1orf135_BC000209	C1orf135	BC000209	1	C1orf135_BC000209	C1orf135
C1orf139_BC007211	C1orf139	BC007211	1	C1orf139_BC007211	C1orf139
C1orf142_BC018760	C1orf142	BC018760	1	C1orf142_BC018760	C1orf142
C1orf142_BC032775	C1orf142	BC032775	1	C1orf142_BC032775	C1orf142
C1orf144_BC065538	C1orf144	BC065538	1	C1orf144_BC065538	C1orf144
C1orf149_BC016328	C1orf149	BC016328	1	C1orf149_BC016328	C1orf149
C1orf150_BC024174	C1orf150	BC024174	1	C1orf150_BC024174	C1orf150
C1orf155_BC033154	C1orf155	BC033154	1	C1orf155_BC033154	C1orf155
C1orf156_BC008679	C1orf156	BC008679	1	C1orf156_BC008679	C1orf156
C1orf158_BC029894	C1orf158	BC029894	1	C1orf158_BC029894	C1orf158
C1orf159_BC008788	C1orf159	BC008788	1	C1orf159_BC008788	C1orf159
C1orf160_BC011579	C1orf160	BC011579	1	C1orf160_BC011579	C1orf160
C1orf162_BC017973	C1orf162	BC017973	1	C1orf162_BC017973	C1orf162
C1orf163_BC015313	C1orf163	BC015313	1	C1orf163_BC015313	C1orf163
C1orf164_BC000279	C1orf164	BC000279	1	C1orf164_BC000279	C1orf164
C1orf165_BC007932	C1orf165	BC007932	1	C1orf165_BC007932	C1orf165
C1orf165_BC011804	C1orf165	BC011804	1	C1orf165_BC011804	C1orf165
C1orf166_BC010101	C1orf166	BC010101	1	C1orf166_BC010101	C1orf166
C1orf169_BC021711	C1orf169	BC021711	1	C1orf169_BC021711	C1orf169
C1orf16_BC036381	C1orf16	BC036381	1	C1orf16_BC036381	C1orf16
C1orf170_BC006300	C1orf170	BC006300	1	C1orf170_BC006300	C1orf170
C1orf173_BC073916	C1orf173	BC073916	1	C1orf173_BC073916	C1orf173
C1orf176_BC021969	C1orf176	BC021969	1	C1orf176_BC021969	C1orf176
C1orf179_BC015993	C1orf179	BC015993	2	C1orf179_BC015993,C1orf179_BC020874	C1orf179
C1orf179_BC020874	C1orf179	BC020874	2	C1orf179_BC015993,C1orf179_BC020874	C1orf179
C1orf182_BC014605	C1orf182	BC014605	1	C1orf182_BC014605	C1orf182
C1orf183_BC031558	C1orf183	BC031558	1	C1orf183_BC031558	C1orf183
C1orf19_BC022030	C1orf19	BC022030	1	C1orf19_BC022030	C1orf19
C1orf21_BC028567	C1orf21	BC028567	1	C1orf21_BC028567	C1orf21
C1orf22_BC016464	C1orf22	BC016464	1	C1orf22_BC016464	C1orf22
C1orf24_BC030531	C1orf24	BC030531	1	C1orf24_BC030531	C1orf24
C1orf25_BC045535	C1orf25	BC045535	1	C1orf25_BC045535	C1orf25
C1orf27_BC003397	C1orf27	BC003397	1	C1orf27_BC003397	C1orf27
C1orf2_BC008854	C1orf2	BC008854	4	C1orf2_BC008854,C1orf2_BC010471,C1orf2_BC017262,C1orf2_BC040136	C1orf2
C1orf2_BC010471	C1orf2	BC010471	4	C1orf2_BC008854,C1orf2_BC010471,C1orf2_BC017262,C1orf2_BC040136	C1orf2
C1orf2_BC017262	C1orf2	BC017262	4	C1orf2_BC008854,C1orf2_BC010471,C1orf2_BC017262,C1orf2_BC040136	C1orf2
C1orf2_BC040136	C1orf2	BC040136	4	C1orf2_BC008854,C1orf2_BC010471,C1orf2_BC017262,C1orf2_BC040136	C1orf2
C1orf33_BC003013	C1orf33	BC003013	1	C1orf33_BC003013	C1orf33
C1orf35_BC002843	C1orf35	BC002843	1	C1orf35_BC002843	C1orf35
C1orf36_BC065541	C1orf36	BC065541	1	C1orf36_BC065541	C1orf36
C1orf37_BC013073	C1orf37	BC013073	2	C1orf37_BC013073,C1orf37_BC067775	C1orf37
C1orf37_BC067775	C1orf37	BC067775	2	C1orf37_BC013073,C1orf37_BC067775	C1orf37
C1orf41_BC005245	C1orf41	BC005245	1	C1orf41_BC005245	C1orf41
C1orf43_BC000152	C1orf43	BC000152	2	C1orf43_BC000152,C1orf43_BC008306	C1orf43
C1orf43_BC008306	C1orf43	BC008306	2	C1orf43_BC000152,C1orf43_BC008306	C1orf43
C1orf48_BC007067	C1orf48	BC007067	1	C1orf48_BC007067	C1orf48
C1orf49_BC034972	C1orf49	BC034972	1	C1orf49_BC034972	C1orf49
C1orf50_BC001711	C1orf50	BC001711	1	C1orf50_BC001711	C1orf50
C1orf51_BC027999	C1orf51	BC027999	1	C1orf51_BC027999	C1orf51
C1orf52_BC029538	C1orf52	BC029538	1	C1orf52_BC029538	C1orf52
C1orf54_BC017761	C1orf54	BC017761	1	C1orf54_BC017761	C1orf54
C1orf56_BC002469	C1orf56	BC002469	1	C1orf56_BC002469	C1orf56
C1orf59_BC012198	C1orf59	BC012198	1	C1orf59_BC012198	C1orf59
C1orf60_BC025254	C1orf60	BC025254	1	C1orf60_BC025254	C1orf60
C1orf62_BC030647	C1orf62	BC030647	1	C1orf62_BC030647	C1orf62
C1orf63_BC001892	C1orf63	BC001892	1	C1orf63_BC001892	C1orf63
C1orf64_BC017946	C1orf64	BC017946	1	C1orf64_BC017946	C1orf64
C1orf65_BC030026	C1orf65	BC030026	1	C1orf65_BC030026	C1orf65
C1orf66_BC011382	C1orf66	BC011382	1	C1orf66_BC011382	C1orf66
C1orf71_BC010228	C1orf71	BC010228	2	C1orf71_BC010228,C1orf71_BC036200	C1orf71
C1orf71_BC036200	C1orf71	BC036200	2	C1orf71_BC010228,C1orf71_BC036200	C1orf71
C1orf73_BC020523	C1orf73	BC020523	2	C1orf73_BC020523,C1orf73_BC033918	C1orf73
C1orf73_BC033918	C1orf73	BC033918	2	C1orf73_BC020523,C1orf73_BC033918	C1orf73
C1orf75_BC006320	C1orf75	BC006320	1	C1orf75_BC006320	C1orf75
C1orf76_BC009382	C1orf76	BC009382	1	C1orf76_BC009382	C1orf76
C1orf78_BC006241	C1orf78	BC006241	1	C1orf78_BC006241	C1orf78
C1orf80_BC015535	C1orf80	BC015535	1	C1orf80_BC015535	C1orf80
C1orf82_BC039014	C1orf82	BC039014	1	C1orf82_BC039014	C1orf82
C1orf83_BC035374	C1orf83	BC035374	1	C1orf83_BC035374	C1orf83
C1orf87_BC042203	C1orf87	BC042203	1	C1orf87_BC042203	C1orf87
C1orf89_BC002946	C1orf89	BC002946	1	C1orf89_BC002946	C1orf89
C1orf90_BC004269	C1orf90	BC004269	1	C1orf90_BC004269	C1orf90
C1orf91_BC001256	C1orf91	BC001256	1	C1orf91_BC001256	C1orf91
C1orf91_BC004885	C1orf91	BC004885	2	C1orf91_BC004885,C1orf91_BC038842	C1orf91
C1orf91_BC038842	C1orf91	BC038842	2	C1orf91_BC004885,C1orf91_BC038842	C1orf91
C1orf92_BC033790	C1orf92	BC033790	1	C1orf92_BC033790	C1orf92
C1orf93_BC022547	C1orf93	BC022547	1	C1orf93_BC022547	C1orf93
C1orf94_BC007637	C1orf94	BC007637	2	C1orf94_BC007637,C1orf94_BC064845	C1orf94
C1orf94_BC064845	C1orf94	BC064845	2	C1orf94_BC007637,C1orf94_BC064845	C1orf94
C1orf97_BC005997	C1orf97	BC005997	1	C1orf97_BC005997	C1orf97
C1QA_BC030153	C1QA	BC030153	1	C1QA_BC030153	C1QA
C1QB_BC008983	C1QB	BC008983	1	C1QB_BC008983	C1QB
C1QBP_BC013731	C1QBP	BC013731	1	C1QBP_BC013731	C1QBP
C1QG_BC009016	C1QG	BC009016	1	C1QG_BC009016	C1QG
C1QTNF1_BC021553	C1QTNF1	BC021553	1	C1QTNF1_BC021553	C1QTNF1
C1QTNF2_BC054506	C1QTNF2	BC054506	1	C1QTNF2_BC054506	C1QTNF2
C1QTNF3_BC016021	C1QTNF3	BC016021	1	C1QTNF3_BC016021	C1QTNF3
C1QTNF4_BC035628	C1QTNF4	BC035628	1	C1QTNF4_BC035628	C1QTNF4
C1QTNF6_BC020551	C1QTNF6	BC020551	1	C1QTNF6_BC020551	C1QTNF6
C1R_BC035220	C1R	BC035220	1	C1R_BC035220	C1R
C20orf100_BC007636	C20orf100	BC007636	1	C20orf100_BC007636	C20orf100
C20orf102_BC033818	C20orf102	BC033818	1	C20orf102_BC033818	C20orf102
C20orf103_BC050727	C20orf103	BC050727	1	C20orf103_BC050727	C20orf103
C20orf107_BC014951	C20orf107	BC014951	1	C20orf107_BC014951	C20orf107
C20orf10_BC036785	C20orf10	BC036785	1	C20orf10_BC036785	C20orf10
C20orf111_BC064973	C20orf111	BC064973	1	C20orf111_BC064973	C20orf111
C20orf112_BC065370	C20orf112	BC065370	1	C20orf112_BC065370	C20orf112
C20orf114_BC008429	C20orf114	BC008429	1	C20orf114_BC008429	C20orf114
C20orf116_BC000643	C20orf116	BC000643	2	C20orf116_BC000643,C20orf116_BC007957	C20orf116
C20orf116_BC007957	C20orf116	BC007957	2	C20orf116_BC000643,C20orf116_BC007957	C20orf116
C20orf11_BC032120	C20orf11	BC032120	1	C20orf11_BC032120	C20orf11
C20orf12_BC036231	C20orf12	BC036231	1	C20orf12_BC036231	C20orf12
C20orf132_BC057767	C20orf132	BC057767	1	C20orf132_BC057767	C20orf132
C20orf13_BC025266	C20orf13	BC025266	1	C20orf13_BC025266	C20orf13
C20orf141_BC014591	C20orf141	BC014591	1	C20orf141_BC014591	C20orf141
C20orf141_BC021178	C20orf141	BC021178	1	C20orf141_BC021178	C20orf141
C20orf144_BC032818	C20orf144	BC032818	1	C20orf144_BC032818	C20orf144
C20orf149_BC002531	C20orf149	BC002531	1	C20orf149_BC002531	C20orf149
C20orf155_BC069010	C20orf155	BC069010	1	C20orf155_BC069010	C20orf155
C20orf160_BC032455	C20orf160	BC032455	1	C20orf160_BC032455	C20orf160
C20orf161_BC019823	C20orf161	BC019823	1	C20orf161_BC019823	C20orf161
C20orf172_BC058899	C20orf172	BC058899	1	C20orf172_BC058899	C20orf172
C20orf177_BC054002	C20orf177	BC054002	1	C20orf177_BC054002	C20orf177
C20orf18_BC000983	C20orf18	BC000983	1	C20orf18_BC000983	C20orf18
C20orf18_BC015219	C20orf18	BC015219	1	C20orf18_BC015219	C20orf18
C20orf20_BC018841	C20orf20	BC018841	1	C20orf20_BC018841	C20orf20
C20orf22_BC014049	C20orf22	BC014049	1	C20orf22_BC014049	C20orf22
C20orf23_BC034984	C20orf23	BC034984	1	C20orf23_BC034984	C20orf23
C20orf23_BC050577	C20orf23	BC050577	1	C20orf23_BC050577	C20orf23
C20orf24_BC001871	C20orf24	BC001871	2	C20orf24_BC001871,C20orf24_BC004446	C20orf24
C20orf24_BC004446	C20orf24	BC004446	2	C20orf24_BC001871,C20orf24_BC004446	C20orf24
C20orf26_BC028708	C20orf26	BC028708	1	C20orf26_BC028708	C20orf26
C20orf26_BC031674	C20orf26	BC031674	1	C20orf26_BC031674	C20orf26
C20orf27_BC012196	C20orf27	BC012196	1	C20orf27_BC012196	C20orf27
C20orf28_BC022476	C20orf28	BC022476	1	C20orf28_BC022476	C20orf28
C20orf30_BC009768	C20orf30	BC009768	3	C20orf30_BC009768,C20orf30_BC009769,C20orf30_BC011990	C20orf30
C20orf30_BC009769	C20orf30	BC009769	3	C20orf30_BC009768,C20orf30_BC009769,C20orf30_BC011990	C20orf30
C20orf30_BC011990	C20orf30	BC011990	3	C20orf30_BC009768,C20orf30_BC009769,C20orf30_BC011990	C20orf30
C20orf31_BC001371	C20orf31	BC001371	1	C20orf31_BC001371	C20orf31
C20orf35_BC001105	C20orf35	BC001105	1	C20orf35_BC001105	C20orf35
C20orf35_BC048286	C20orf35	BC048286	1	C20orf35_BC048286	C20orf35
C20orf38_BC020656	C20orf38	BC020656	1	C20orf38_BC020656	C20orf38
C20orf39_BC030637	C20orf39	BC030637	1	C20orf39_BC030637	C20orf39
C20orf3_BC003501	C20orf3	BC003501	1	C20orf3_BC003501	C20orf3
C20orf43_BC002769	C20orf43	BC002769	2	C20orf43_BC002769,C20orf43_BC003359	C20orf43
C20orf43_BC003359	C20orf43	BC003359	2	C20orf43_BC002769,C20orf43_BC003359	C20orf43
C20orf44_BC008871	C20orf44	BC008871	1	C20orf44_BC008871	C20orf44
C20orf45_BC010649	C20orf45	BC010649	1	C20orf45_BC010649	C20orf45
C20orf47_BC009765	C20orf47	BC009765	2	C20orf47_BC009765,C20orf47_BC014014	C20orf47
C20orf47_BC014014	C20orf47	BC014014	2	C20orf47_BC009765,C20orf47_BC014014	C20orf47
C20orf4_BC001751	C20orf4	BC001751	1	C20orf4_BC001751	C20orf4
C20orf52_BC008488	C20orf52	BC008488	1	C20orf52_BC008488	C20orf52
C20orf54_BC009750	C20orf54	BC009750	1	C20orf54_BC009750	C20orf54
C20orf55_BC022238	C20orf55	BC022238	1	C20orf55_BC022238	C20orf55
C20orf58_BC041812	C20orf58	BC041812	1	C20orf58_BC041812	C20orf58
C20orf67_BC013365	C20orf67	BC013365	1	C20orf67_BC013365	C20orf67
C20orf70_BC065726	C20orf70	BC065726	1	C20orf70_BC065726	C20orf70
C20orf71_BC066354	C20orf71	BC066354	1	C20orf71_BC066354	C20orf71
C20orf72_BC016869	C20orf72	BC016869	1	C20orf72_BC016869	C20orf72
C20orf74_BC013749	C20orf74	BC013749	1	C20orf74_BC013749	C20orf74
C20orf75_BC019612	C20orf75	BC019612	1	C20orf75_BC019612	C20orf75
C20orf77_BC033629	C20orf77	BC033629	1	C20orf77_BC033629	C20orf77
C20orf7_BC005984	C20orf7	BC005984	1	C20orf7_BC005984	C20orf7
C20orf7_BC073158	C20orf7	BC073158	1	C20orf7_BC073158	C20orf7
C20orf81_BC014247	C20orf81	BC014247	2	C20orf81_BC014247,C20orf81_BC051816	C20orf81
C20orf81_BC051816	C20orf81	BC051816	2	C20orf81_BC014247,C20orf81_BC051816	C20orf81
C20orf96_BC051762	C20orf96	BC051762	1	C20orf96_BC051762	C20orf96
C20orf98_BC001963	C20orf98	BC001963	1	C20orf98_BC001963	C20orf98
C20orf9_BC039831	C20orf9	BC039831	1	C20orf9_BC039831	C20orf9
C21orf106_BC033718	C21orf106	BC033718	2	C21orf106_BC033718,C21orf106_BC038443	C21orf106
C21orf106_BC038443	C21orf106	BC038443	2	C21orf106_BC033718,C21orf106_BC038443	C21orf106
C21orf106_BC046176	C21orf106	BC046176	1	C21orf106_BC046176	C21orf106
C21orf121_BC029588	C21orf121	BC029588	1	C21orf121_BC029588	C21orf121
C21orf122_BC004343	C21orf122	BC004343	1	C21orf122_BC004343	C21orf122
C21orf127_BC011554	C21orf127	BC011554	1	C21orf127_BC011554	C21orf127
C21orf128_BC063412	C21orf128	BC063412	1	C21orf128_BC063412	C21orf128
C21orf13_BC031059	C21orf13	BC031059	1	C21orf13_BC031059	C21orf13
C21orf18_BC002898	C21orf18	BC002898	1	C21orf18_BC002898	C21orf18
C21orf25_BC062323	C21orf25	BC062323	1	C21orf25_BC062323	C21orf25
C21orf29_BC021197	C21orf29	BC021197	1	C21orf29_BC021197	C21orf29
C21orf2_BC031300	C21orf2	BC031300	1	C21orf2_BC031300	C21orf2
C21orf33_BC003587	C21orf33	BC003587	1	C21orf33_BC003587	C21orf33
C21orf45_BC042917	C21orf45	BC042917	1	C21orf45_BC042917	C21orf45
C21orf51_BC015596	C21orf51	BC015596	1	C21orf51_BC015596	C21orf51
C21orf55_BC029509	C21orf55	BC029509	1	C21orf55_BC029509	C21orf55
C21orf56_BC009497	C21orf56	BC009497	1	C21orf56_BC009497	C21orf56
C21orf59_BC000709	C21orf59	BC000709	1	C21orf59_BC000709	C21orf59
C21orf63_BC038710	C21orf63	BC038710	1	C21orf63_BC038710	C21orf63
C21orf6_BC012546	C21orf6	BC012546	2	C21orf6_BC012546,C21orf6_BC017912	C21orf6
C21orf6_BC017912	C21orf6	BC017912	2	C21orf6_BC012546,C21orf6_BC017912	C21orf6
C21orf70_BC009341	C21orf70	BC009341	1	C21orf70_BC009341	C21orf70
C21orf77_BC027970	C21orf77	BC027970	1	C21orf77_BC027970	C21orf77
C21orf7_BC008567	C21orf7	BC008567	1	C21orf7_BC008567	C21orf7
C21orf88_BC080530	C21orf88	BC080530	1	C21orf88_BC080530	C21orf88
C21orf91_BC015468	C21orf91	BC015468	1	C21orf91_BC015468	C21orf91
C22orf13_BC070109	C22orf13	BC070109	1	C22orf13_BC070109	C22orf13
C22orf18_BC000705	C22orf18	BC000705	1	C22orf18_BC000705	C22orf18
C22orf19_BC003615	C22orf19	BC003615	1	C22orf19_BC003615	C22orf19
C22orf23_BC031998	C22orf23	BC031998	1	C22orf23_BC031998	C22orf23
C22orf3_BC002705	C22orf3	BC002705	1	C22orf3_BC002705	C22orf3
C22orf5_BC015489	C22orf5	BC015489	1	C22orf5_BC015489	C22orf5
C22orf8_BC013696	C22orf8	BC013696	1	C22orf8_BC013696	C22orf8
C22orf9_BC053595	C22orf9	BC053595	1	C22orf9_BC053595	C22orf9
C2F_BC055314	C2F	BC055314	1	C2F_BC055314	C2F
C2orf13_BC041144	C2orf13	BC041144	1	C2orf13_BC041144	C2orf13
C2orf15_BC021264	C2orf15	BC021264	1	C2orf15_BC021264	C2orf15
C2orf18_BC028081	C2orf18	BC028081	1	C2orf18_BC028081	C2orf18
C2orf19_BC031945	C2orf19	BC031945	1	C2orf19_BC031945	C2orf19
C2orf23_BC064846	C2orf23	BC064846	1	C2orf23_BC064846	C2orf23
C2orf24_BC001393	C2orf24	BC001393	2	C2orf24_BC001393,C2orf24_BC012821	C2orf24
C2orf24_BC012821	C2orf24	BC012821	2	C2orf24_BC001393,C2orf24_BC012821	C2orf24
C2orf25_BC000932	C2orf25	BC000932	1	C2orf25_BC000932	C2orf25
C2orf28_BC011006	C2orf28	BC011006	1	C2orf28_BC011006	C2orf28
C2orf30_BC013129	C2orf30	BC013129	2	C2orf30_BC013129,C2orf30_BC022228	C2orf30
C2orf30_BC022228	C2orf30	BC022228	2	C2orf30_BC013129,C2orf30_BC022228	C2orf30
C2orf34_BC029359	C2orf34	BC029359	2	C2orf34_BC029359,C2orf34_BC053733	C2orf34
C2orf34_BC053733	C2orf34	BC053733	2	C2orf34_BC029359,C2orf34_BC053733	C2orf34
C2orf4_BC018733	C2orf4	BC018733	2	C2orf4_BC018733,C2orf4_BC070046	C2orf4
C2orf4_BC070046	C2orf4	BC070046	2	C2orf4_BC018733,C2orf4_BC070046	C2orf4
C2orf7_BC005069	C2orf7	BC005069	1	C2orf7_BC005069	C2orf7
C3AR1_BC020742	C3AR1	BC020742	1	C3AR1_BC020742	C3AR1
C3orf10_BC001067	C3orf10	BC001067	1	C3orf10_BC001067	C3orf10
C3orf14_BC017772	C3orf14	BC017772	1	C3orf14_BC017772	C3orf14
C3orf17_BC067743	C3orf17	BC067743	1	C3orf17_BC067743	C3orf17
C3orf18_BC034766	C3orf18	BC034766	1	C3orf18_BC034766	C3orf18
C3orf19_BC013999	C3orf19	BC013999	1	C3orf19_BC013999	C3orf19
C3orf1_BC012341	C3orf1	BC012341	1	C3orf1_BC012341	C3orf1
C3orf20_BC038406	C3orf20	BC038406	1	C3orf20_BC038406	C3orf20
C3orf22_BC032025	C3orf22	BC032025	1	C3orf22_BC032025	C3orf22
C3orf4_BC013610	C3orf4	BC013610	1	C3orf4_BC013610	C3orf4
C3orf6_BC065004	C3orf6	BC065004	1	C3orf6_BC065004	C3orf6
C4BPB_BC005378	C4BPB	BC005378	1	C4BPB_BC005378	C4BPB
C4orf13_BC023288	C4orf13	BC023288	2	C4orf13_BC023288,C4orf13_BC063471	C4orf13
C4orf13_BC063471	C4orf13	BC063471	2	C4orf13_BC023288,C4orf13_BC063471	C4orf13
C4orf14_BC004894	C4orf14	BC004894	1	C4orf14_BC004894	C4orf14
C4orf15_BC003648	C4orf15	BC003648	1	C4orf15_BC003648	C4orf15
C4orf16_BC009485	C4orf16	BC009485	1	C4orf16_BC009485	C4orf16
C4orf7_BC062213	C4orf7	BC062213	1	C4orf7_BC062213	C4orf7
C4orf9_BC026035	C4orf9	BC026035	1	C4orf9_BC026035	C4orf9
C5orf13_BC019068	C5orf13	BC019068	1	C5orf13_BC019068	C5orf13
C5orf14_BC001615	C5orf14	BC001615	1	C5orf14_BC001615	C5orf14
C5orf15_BC020875	C5orf15	BC020875	1	C5orf15_BC020875	C5orf15
C5orf16_BC063469	C5orf16	BC063469	1	C5orf16_BC063469	C5orf16
C5orf18_BC065926	C5orf18	BC065926	1	C5orf18_BC065926	C5orf18
C5orf19_BC006218	C5orf19	BC006218	1	C5orf19_BC006218	C5orf19
C5orf20_BC069608	C5orf20	BC069608	1	C5orf20_BC069608	C5orf20
C5orf3_BC011414	C5orf3	BC011414	1	C5orf3_BC011414	C5orf3
C5orf4_BC007216	C5orf4	BC007216	1	C5orf4_BC007216	C5orf4
C5R1_BC008982	C5R1	BC008982	1	C5R1_BC008982	C5R1
C6_BC035723	C6	BC035723	1	C6_BC035723	C6
C6orf102_BC022074	C6orf102	BC022074	1	C6orf102_BC022074	C6orf102
C6orf105_BC007011	C6orf105	BC007011	1	C6orf105_BC007011	C6orf105
C6orf106_BC002328	C6orf106	BC002328	1	C6orf106_BC002328	C6orf106
C6orf108_BC011683	C6orf108	BC011683	1	C6orf108_BC011683	C6orf108
C6orf10_BC034774	C6orf10	BC034774	1	C6orf10_BC034774	C6orf10
C6orf113_BC016879	C6orf113	BC016879	1	C6orf113_BC016879	C6orf113
C6orf115_BC014953	C6orf115	BC014953	1	C6orf115_BC014953	C6orf115
C6orf117_BC010003	C6orf117	BC010003	1	C6orf117_BC010003	C6orf117
C6orf118_BC026278	C6orf118	BC026278	1	C6orf118_BC026278	C6orf118
C6orf123_BC027853	C6orf123	BC027853	1	C6orf123_BC027853	C6orf123
C6orf125_BC006007	C6orf125	BC006007	1	C6orf125_BC006007	C6orf125
C6orf128_BC026012	C6orf128	BC026012	1	C6orf128_BC026012	C6orf128
C6orf128_BC029657	C6orf128	BC029657	1	C6orf128_BC029657	C6orf128
C6orf134_BC025755	C6orf134	BC025755	1	C6orf134_BC025755	C6orf134
C6orf134_BC047303	C6orf134	BC047303	1	C6orf134_BC047303	C6orf134
C6orf136_BC016167	C6orf136	BC016167	1	C6orf136_BC016167	C6orf136
C6orf139_BC016279	C6orf139	BC016279	1	C6orf139_BC016279	C6orf139
C6orf141_BC036917	C6orf141	BC036917	1	C6orf141_BC036917	C6orf141
C6orf142_BC009010	C6orf142	BC009010	1	C6orf142_BC009010	C6orf142
C6orf146_BC039349	C6orf146	BC039349	1	C6orf146_BC039349	C6orf146
C6orf148_BC022080	C6orf148	BC022080	1	C6orf148_BC022080	C6orf148
C6orf152_BC050327	C6orf152	BC050327	1	C6orf152_BC050327	C6orf152
C6orf162_BC070260	C6orf162	BC070260	1	C6orf162_BC070260	C6orf162
C6orf165_BC035083	C6orf165	BC035083	1	C6orf165_BC035083	C6orf165
C6orf166_BC000764	C6orf166	BC000764	1	C6orf166_BC000764	C6orf166
C6orf168_BC006515	C6orf168	BC006515	1	C6orf168_BC006515	C6orf168
C6orf168_BC011583	C6orf168	BC011583	1	C6orf168_BC011583	C6orf168
C6orf182_BC033448	C6orf182	BC033448	2	C6orf182_BC033448,C6orf182_BC064365	C6orf182
C6orf182_BC064365	C6orf182	BC064365	2	C6orf182_BC033448,C6orf182_BC064365	C6orf182
C6orf188_BC032556	C6orf188	BC032556	1	C6orf188_BC032556	C6orf188
C6orf194_BC038240	C6orf194	BC038240	1	C6orf194_BC038240	C6orf194
C6orf199_BC022031	C6orf199	BC022031	1	C6orf199_BC022031	C6orf199
C6orf201_BC066986	C6orf201	BC066986	1	C6orf201_BC066986	C6orf201
C6orf203_BC010899	C6orf203	BC010899	1	C6orf203_BC010899	C6orf203
C6orf206_BC029519	C6orf206	BC029519	1	C6orf206_BC029519	C6orf206
C6orf211_BC011348	C6orf211	BC011348	1	C6orf211_BC011348	C6orf211
C6orf32_BC001232	C6orf32	BC001232	1	C6orf32_BC001232	C6orf32
C6orf35_BC029130	C6orf35	BC029130	1	C6orf35_BC029130	C6orf35
C6orf48_BC000706	C6orf48	BC000706	1	C6orf48_BC000706	C6orf48
C6orf48_BC017660	C6orf48	BC017660	1	C6orf48_BC017660	C6orf48
C6orf49_BC015975	C6orf49	BC015975	1	C6orf49_BC015975	C6orf49
C6orf51_BC011593	C6orf51	BC011593	1	C6orf51_BC011593	C6orf51
C6orf55_BC022536	C6orf55	BC022536	1	C6orf55_BC022536	C6orf55
C6orf57_BC018085	C6orf57	BC018085	1	C6orf57_BC018085	C6orf57
C6orf60_BC060769	C6orf60	BC060769	1	C6orf60_BC060769	C6orf60
C6orf64_BC022007	C6orf64	BC022007	1	C6orf64_BC022007	C6orf64
C6orf66_BC039464	C6orf66	BC039464	1	C6orf66_BC039464	C6orf66
C6orf68_BC013026	C6orf68	BC013026	1	C6orf68_BC013026	C6orf68
C6orf71_BC056253	C6orf71	BC056253	1	C6orf71_BC056253	C6orf71
C6orf72_BC014320	C6orf72	BC014320	1	C6orf72_BC014320	C6orf72
C6orf78_BC057769	C6orf78	BC057769	1	C6orf78_BC057769	C6orf78
C6orf82_BC005890	C6orf82	BC005890	1	C6orf82_BC005890	C6orf82
C6orf84_BC063632	C6orf84	BC063632	1	C6orf84_BC063632	C6orf84
C6orf85_BC022217	C6orf85	BC022217	1	C6orf85_BC022217	C6orf85
C6orf93_BC009855	C6orf93	BC009855	1	C6orf93_BC009855	C6orf93
C6orf96_BC012081	C6orf96	BC012081	1	C6orf96_BC012081	C6orf96
C6orf97_BC060803	C6orf97	BC060803	1	C6orf97_BC060803	C6orf97
C7_BC063851	C7	BC063851	1	C7_BC063851	C7
C7orf11_BC026265	C7orf11	BC026265	1	C7orf11_BC026265	C7orf11
C7orf16_BC028094	C7orf16	BC028094	1	C7orf16_BC028094	C7orf16
C7orf20_BC003550	C7orf20	BC003550	1	C7orf20_BC003550	C7orf20
C7orf21_BC000936	C7orf21	BC000936	1	C7orf21_BC000936	C7orf21
C7orf23_BC002837	C7orf23	BC002837	1	C7orf23_BC002837	C7orf23
C7orf24_BC000625	C7orf24	BC000625	2	C7orf24_BC000625,C7orf24_BC005356	C7orf24
C7orf24_BC005356	C7orf24	BC005356	2	C7orf24_BC000625,C7orf24_BC005356	C7orf24
C7orf25_BC000769	C7orf25	BC000769	1	C7orf25_BC000769	C7orf25
C7orf27_BC015632	C7orf27	BC015632	1	C7orf27_BC015632	C7orf27
C7orf28B_BC010130	C7orf28B	BC010130	1	C7orf28B_BC010130	C7orf28B
C7orf29_BC011406	C7orf29	BC011406	1	C7orf29_BC011406	C7orf29
C7orf30_BC012331	C7orf30	BC012331	1	C7orf30_BC012331	C7orf30
C7orf31_BC015397	C7orf31	BC015397	1	C7orf31_BC015397	C7orf31
C7orf31_BC043269	C7orf31	BC043269	2	C7orf31_BC043269,C7orf31_BC060879	C7orf31
C7orf31_BC060879	C7orf31	BC060879	2	C7orf31_BC043269,C7orf31_BC060879	C7orf31
C7orf33_BC021251	C7orf33	BC021251	1	C7orf33_BC021251	C7orf33
C7orf34_BC014596	C7orf34	BC014596	1	C7orf34_BC014596	C7orf34
C7orf36_BC022043	C7orf36	BC022043	1	C7orf36_BC022043	C7orf36
C8orf1_BC031054	C8orf1	BC031054	1	C8orf1_BC031054	C8orf1
C8orf20_BC013048	C8orf20	BC013048	1	C8orf20_BC013048	C8orf20
C8orf22_BC017981	C8orf22	BC017981	1	C8orf22_BC017981	C8orf22
C8orf31_BC073830	C8orf31	BC073830	1	C8orf31_BC073830	C8orf31
C8orf32_BC008781	C8orf32	BC008781	1	C8orf32_BC008781	C8orf32
C8orf33_BC010001	C8orf33	BC010001	1	C8orf33_BC010001	C8orf33
C8orf35_BC001915	C8orf35	BC001915	1	C8orf35_BC001915	C8orf35
C8orf36_BC032797	C8orf36	BC032797	1	C8orf36_BC032797	C8orf36
C8orf38_BC028166	C8orf38	BC028166	1	C8orf38_BC028166	C8orf38
C8orf40_BC013035	C8orf40	BC013035	1	C8orf40_BC013035	C8orf40
C8orf41_BC007387	C8orf41	BC007387	2	C8orf41_BC007387,C8orf41_BC066935	C8orf41
C8orf41_BC066935	C8orf41	BC066935	2	C8orf41_BC007387,C8orf41_BC066935	C8orf41
C8orf43_BC008253	C8orf43	BC008253	1	C8orf43_BC008253	C8orf43
C8orf44_BC014448	C8orf44	BC014448	1	C8orf44_BC014448	C8orf44
C8orf45_BC063108	C8orf45	BC063108	1	C8orf45_BC063108	C8orf45
C8orf48_BC031245	C8orf48	BC031245	1	C8orf48_BC031245	C8orf48
C8orf4_BC021672	C8orf4	BC021672	1	C8orf4_BC021672	C8orf4
C8orf51_BC000203	C8orf51	BC000203	1	C8orf51_BC000203	C8orf51
C8orf53_BC005955	C8orf53	BC005955	1	C8orf53_BC005955	C8orf53
C8orf56_BC029562	C8orf56	BC029562	1	C8orf56_BC029562	C8orf56
C8orf58_BC012750	C8orf58	BC012750	1	C8orf58_BC012750	C8orf58
C8orf59_BC032347	C8orf59	BC032347	1	C8orf59_BC032347	C8orf59
C8orf68_BC022082	C8orf68	BC022082	1	C8orf68_BC022082	C8orf68
C8orf70_BC009074	C8orf70	BC009074	1	C8orf70_BC009074	C8orf70
C8orf72_BC024294	C8orf72	BC024294	1	C8orf72_BC024294	C8orf72
C8orf76_BC012379	C8orf76	BC012379	1	C8orf76_BC012379	C8orf76
C9_BC020721	C9	BC020721	1	C9_BC020721	C9
C9orf100_BC033666	C9orf100	BC033666	1	C9orf100_BC033666	C9orf100
C9orf102_BC022957	C9orf102	BC022957	1	C9orf102_BC022957	C9orf102
C9orf105_BC034247	C9orf105	BC034247	1	C9orf105_BC034247	C9orf105
C9orf112_BC017335	C9orf112	BC017335	1	C9orf112_BC017335	C9orf112
C9orf112_BC040173	C9orf112	BC040173	1	C9orf112_BC040173	C9orf112
C9orf114_BC063644	C9orf114	BC063644	1	C9orf114_BC063644	C9orf114
C9orf115_BC047012	C9orf115	BC047012	1	C9orf115_BC047012	C9orf115
C9orf116_BC021261	C9orf116	BC021261	1	C9orf116_BC021261	C9orf116
C9orf11_BC014307	C9orf11	BC014307	1	C9orf11_BC014307	C9orf11
C9orf121_BC022521	C9orf121	BC022521	1	C9orf121_BC022521	C9orf121
C9orf123_BC009510	C9orf123	BC009510	1	C9orf123_BC009510	C9orf123
C9orf125_BC006115	C9orf125	BC006115	1	C9orf125_BC006115	C9orf125
C9orf132_BC047949	C9orf132	BC047949	1	C9orf132_BC047949	C9orf132
C9orf138_BC033489	C9orf138	BC033489	1	C9orf138_BC033489	C9orf138
C9orf150_BC036923	C9orf150	BC036923	1	C9orf150_BC036923	C9orf150
C9orf156_BC002863	C9orf156	BC002863	1	C9orf156_BC002863	C9orf156
C9orf16_BC001857	C9orf16	BC001857	1	C9orf16_BC001857	C9orf16
C9orf19_BC017918	C9orf19	BC017918	1	C9orf19_BC017918	C9orf19
C9orf23_BC032136	C9orf23	BC032136	1	C9orf23_BC032136	C9orf23
C9orf24_BC022084	C9orf24	BC022084	2	C9orf24_BC022084,C9orf24_BC029484	C9orf24
C9orf24_BC029484	C9orf24	BC029484	2	C9orf24_BC022084,C9orf24_BC029484	C9orf24
C9orf26_BC047085	C9orf26	BC047085	1	C9orf26_BC047085	C9orf26
C9orf28_BC028675	C9orf28	BC028675	1	C9orf28_BC028675	C9orf28
C9orf41_BC034033	C9orf41	BC034033	1	C9orf41_BC034033	C9orf41
C9orf42_BC013062	C9orf42	BC013062	1	C9orf42_BC013062	C9orf42
C9orf43_BC033037	C9orf43	BC033037	1	C9orf43_BC033037	C9orf43
C9orf46_BC008212	C9orf46	BC008212	1	C9orf46_BC008212	C9orf46
C9orf52_BC038592	C9orf52	BC038592	1	C9orf52_BC038592	C9orf52
C9orf58_BC021253	C9orf58	BC021253	1	C9orf58_BC021253	C9orf58
C9orf61_BC021685	C9orf61	BC021685	1	C9orf61_BC021685	C9orf61
C9orf62_BC034752	C9orf62	BC034752	1	C9orf62_BC034752	C9orf62
C9orf64_BC004407	C9orf64	BC004407	1	C9orf64_BC004407	C9orf64
C9orf65_BC019095	C9orf65	BC019095	1	C9orf65_BC019095	C9orf65
C9orf68_BC034293	C9orf68	BC034293	2	C9orf68_BC034293,C9orf68_BC036349	C9orf68
C9orf68_BC036349	C9orf68	BC036349	2	C9orf68_BC034293,C9orf68_BC036349	C9orf68
C9orf6_BC015795	C9orf6	BC015795	1	C9orf6_BC015795	C9orf6
C9orf70_BC007366	C9orf70	BC007366	1	C9orf70_BC007366	C9orf70
C9orf71_BC029780	C9orf71	BC029780	1	C9orf71_BC029780	C9orf71
C9orf72_BC068445	C9orf72	BC068445	1	C9orf72_BC068445	C9orf72
C9orf74_BC003581	C9orf74	BC003581	2	C9orf74_BC003581,C9orf74_BC011620	C9orf74
C9orf74_BC011620	C9orf74	BC011620	2	C9orf74_BC003581,C9orf74_BC011620	C9orf74
C9orf76_BC064937	C9orf76	BC064937	1	C9orf76_BC064937	C9orf76
C9orf78_BC007664	C9orf78	BC007664	2	C9orf78_BC007664,C9orf78_BC017570	C9orf78
C9orf78_BC017570	C9orf78	BC017570	2	C9orf78_BC007664,C9orf78_BC017570	C9orf78
C9orf7_BC030558	C9orf7	BC030558	1	C9orf7_BC030558	C9orf7
C9orf80_BC014881	C9orf80	BC014881	1	C9orf80_BC014881	C9orf80
C9orf82_BC014658	C9orf82	BC014658	2	C9orf82_BC014658,C9orf82_BC071953	C9orf82
C9orf82_BC071953	C9orf82	BC071953	2	C9orf82_BC014658,C9orf82_BC071953	C9orf82
C9orf85_BC010179	C9orf85	BC010179	2	C9orf85_BC010179,C9orf85_BC052375	C9orf85
C9orf85_BC052375	C9orf85	BC052375	2	C9orf85_BC010179,C9orf85_BC052375	C9orf85
C9orf86_BC002945	C9orf86	BC002945	1	C9orf86_BC002945	C9orf86
C9orf86_BC021095	C9orf86	BC021095	1	C9orf86_BC021095	C9orf86
C9orf89_BC004500	C9orf89	BC004500	1	C9orf89_BC004500	C9orf89
C9orf90_BC021580	C9orf90	BC021580	1	C9orf90_BC021580	C9orf90
C9orf95_BC001366	C9orf95	BC001366	2	C9orf95_BC001366,C9orf95_BC036804	C9orf95
C9orf95_BC036804	C9orf95	BC036804	2	C9orf95_BC001366,C9orf95_BC036804	C9orf95
C9orf96_BC036504	C9orf96	BC036504	1	C9orf96_BC036504	C9orf96
C9orf97_BC022958	C9orf97	BC022958	1	C9orf97_BC022958	C9orf97
C9orf97_BC035604	C9orf97	BC035604	1	C9orf97_BC035604	C9orf97
C9orf98_BC034776	C9orf98	BC034776	1	C9orf98_BC034776	C9orf98
C9orf9_BC012940	C9orf9	BC012940	1	C9orf9_BC012940	C9orf9
CA10_BC020577	CA10	BC020577	1	CA10_BC020577	CA10
CA11_BC002662	CA11	BC002662	1	CA11_BC002662	CA11
CA12_BC001012	CA12	BC001012	1	CA12_BC001012	CA12
CA13_BC052602	CA13	BC052602	1	CA13_BC052602	CA13
CA14_BC034412	CA14	BC034412	1	CA14_BC034412	CA14
CA1_BC027890	CA1	BC027890	1	CA1_BC027890	CA1
CA2_BC011949	CA2	BC011949	1	CA2_BC011949	CA2
CA3_BC004897	CA3	BC004897	1	CA3_BC004897	CA3
CA4_BC057792	CA4	BC057792	1	CA4_BC057792	CA4
CA5B_BC028142	CA5B	BC028142	1	CA5B_BC028142	CA5B
CA6_BC034350	CA6	BC034350	1	CA6_BC034350	CA6
CA7_BC033865	CA7	BC033865	1	CA7_BC033865	CA7
CA8_BC015531	CA8	BC015531	3	CA8_BC015531,CA8_BC069744,CA8_BC069794	CA8
CA8_BC069744	CA8	BC069744	3	CA8_BC015531,CA8_BC069744,CA8_BC069794	CA8
CA8_BC069794	CA8	BC069794	3	CA8_BC015531,CA8_BC069744,CA8_BC069794	CA8
CA9_BC014950	CA9	BC014950	1	CA9_BC014950	CA9
CAB39L_BC010993	CAB39L	BC010993	1	CAB39L_BC010993	CAB39L
CABC1_BC005171	CABC1	BC005171	1	CABC1_BC005171	CABC1
CABLES1_BC037218	CABLES1	BC037218	1	CABLES1_BC037218	CABLES1
CABP7_BC051805	CABP7	BC051805	1	CABP7_BC051805	CABP7
CABYR_BC011996	CABYR	BC011996	1	CABYR_BC011996	CABYR
CACNA2D4_BC048288	CACNA2D4	BC048288	1	CACNA2D4_BC048288	CACNA2D4
CACNB1_BC037311	CACNB1	BC037311	1	CACNB1_BC037311	CACNB1
CACNG2_BC069612	CACNG2	BC069612	1	CACNG2_BC069612	CACNG2
CACNG3_BC040005	CACNG3	BC040005	1	CACNG3_BC040005	CACNG3
CACNG4_BC034532	CACNG4	BC034532	1	CACNG4_BC034532	CACNG4
CACYBP_BC005975	CACYBP	BC005975	1	CACYBP_BC005975	CACYBP
CADM1_BC047021	CADM1	BC047021	1	CADM1_BC047021	CADM1
CAGE1_BC026194	CAGE1	BC026194	1	CAGE1_BC026194	CAGE1
CALB2_BC015484	CALB2	BC015484	1	CALB2_BC015484	CALB2
CALCA_BC069760	CALCA	BC069760	1	CALCA_BC069760	CALCA
CALCB_BC008428	CALCB	BC008428	1	CALCB_BC008428	CALCB
CALCOCO1_BC003177	CALCOCO1	BC003177	1	CALCOCO1_BC003177	CALCOCO1
CALCR_BC069611	CALCR	BC069611	1	CALCR_BC069611	CALCR
CALD1_BC040354	CALD1	BC040354	1	CALD1_BC040354	CALD1
CALM1_BC007965	CALM1	BC007965	1	CALM1_BC007965	CALM1
CALM1_BC008597	CALM1	BC008597	1	CALM1_BC008597	CALM1
CALM2_BC003354	CALM2	BC003354	2	CALM2_BC003354,CALM2_BC008437	CALM2
CALM2_BC008437	CALM2	BC008437	2	CALM2_BC003354,CALM2_BC008437	CALM2
CALM3_BC005137	CALM3	BC005137	2	CALM3_BC005137,CALM3_BC006182	CALM3
CALM3_BC006182	CALM3	BC006182	2	CALM3_BC005137,CALM3_BC006182	CALM3
CALML3_BC031889	CALML3	BC031889	1	CALML3_BC031889	CALML3
CALML4_BC009516	CALML4	BC009516	1	CALML4_BC009516	CALML4
CALML5_BC039172	CALML5	BC039172	1	CALML5_BC039172	CALML5
CALN1_BC020200	CALN1	BC020200	1	CALN1_BC020200	CALN1
CALR3_BC014595	CALR3	BC014595	1	CALR3_BC014595	CALR3
CALR_BC020493	CALR	BC020493	1	CALR_BC020493	CALR
CALU_BC013383	CALU	BC013383	1	CALU_BC013383	CALU
CAMK1D_BC035745	CAMK1D	BC035745	1	CAMK1D_BC035745	CAMK1D
CAMK1G_BC032787	CAMK1G	BC032787	1	CAMK1G_BC032787	CAMK1G
CAMK2B_BC019070	CAMK2B	BC019070	1	CAMK2B_BC019070	CAMK2B
CAMK2D_BC032784	CAMK2D	BC032784	1	CAMK2D_BC032784	CAMK2D
CAMK4_BC016695	CAMK4	BC016695	1	CAMK4_BC016695	CAMK4
CAMKK1_BC031647	CAMKK1	BC031647	1	CAMKK1_BC031647	CAMKK1
CAMKV_BC000497	CAMKV	BC000497	2	CAMKV_BC000497,CAMKV_BC019256	CAMKV
CAMKV_BC019256	CAMKV	BC019256	2	CAMKV_BC000497,CAMKV_BC019256	CAMKV
CAMP_BC055089	CAMP	BC055089	1	CAMP_BC055089	CAMP
CAMTA2_BC032381	CAMTA2	BC032381	1	CAMTA2_BC032381	CAMTA2
CANT1_BC017655	CANT1	BC017655	1	CANT1_BC017655	CANT1
CANX_BC003552	CANX	BC003552	1	CANX_BC003552	CANX
CAP1_BC013963	CAP1	BC013963	1	CAP1_BC013963	CAP1
CAP2_BC008481	CAP2	BC008481	1	CAP2_BC008481	CAP2
CAPG_BC000728	CAPG	BC000728	2	CAPG_BC000728,CAPG_BC014549	CAPG
CAPG_BC014549	CAPG	BC014549	2	CAPG_BC000728,CAPG_BC014549	CAPG
CAPN11_BC033733	CAPN11	BC033733	1	CAPN11_BC033733	CAPN11
CAPN1_BC008751	CAPN1	BC008751	2	CAPN1_BC008751,CAPN1_BC017200	CAPN1
CAPN1_BC017200	CAPN1	BC017200	2	CAPN1_BC008751,CAPN1_BC017200	CAPN1
CAPN2_BC021303	CAPN2	BC021303	1	CAPN2_BC021303	CAPN2
CAPN3_BC003169	CAPN3	BC003169	1	CAPN3_BC003169	CAPN3
CAPN3_BC003521	CAPN3	BC003521	1	CAPN3_BC003521	CAPN3
CAPN5_BC018123	CAPN5	BC018123	1	CAPN5_BC018123	CAPN5
CAPN6_BC000730	CAPN6	BC000730	1	CAPN6_BC000730	CAPN6
CAPN7_BC056202	CAPN7	BC056202	1	CAPN7_BC056202	CAPN7
CAPNS2_BC005397	CAPNS2	BC005397	1	CAPNS2_BC005397	CAPNS2
CAPS2_BC056672	CAPS2	BC056672	1	CAPS2_BC056672	CAPS2
CAPSL_BC017586	CAPSL	BC017586	1	CAPSL_BC017586	CAPSL
CAPZA2_BC005338	CAPZA2	BC005338	1	CAPZA2_BC005338	CAPZA2
CAPZA3_BC016745	CAPZA3	BC016745	1	CAPZA3_BC016745	CAPZA3
CAPZB_BC012305	CAPZB	BC012305	1	CAPZB_BC012305	CAPZB
CARD12_BC031555	CARD12	BC031555	1	CARD12_BC031555	CARD12
CARD14_BC018142	CARD14	BC018142	1	CARD14_BC018142	CARD14
CARD4_BC040339	CARD4	BC040339	1	CARD4_BC040339	CARD4
CARD8_BC056891	CARD8	BC056891	1	CARD8_BC056891	CARD8
CARD9_BC008877	CARD9	BC008877	2	CARD9_BC008877,CARD9_BC070091	CARD9
CARD9_BC070091	CARD9	BC070091	2	CARD9_BC008877,CARD9_BC070091	CARD9
CARF_BC022270	CARF	BC022270	1	CARF_BC022270	CARF
CARKL_BC020543	CARKL	BC020543	1	CARKL_BC020543	CARKL
CARS_BC002880	CARS	BC002880	1	CARS_BC002880	CARS
CART1_BC010923	CART1	BC010923	1	CART1_BC010923	CART1
CART_BC029882	CART	BC029882	1	CART_BC029882	CART
CASC3_BC050526	CASC3	BC050526	1	CASC3_BC050526	CASC3
CASC4_BC012124	CASC4	BC012124	2	CASC4_BC012124,CASC4_BC063480	CASC4
CASC4_BC063480	CASC4	BC063480	2	CASC4_BC012124,CASC4_BC063480	CASC4
CASP10_BC042844	CASP10	BC042844	1	CASP10_BC042844	CASP10
CASP14_BC069541	CASP14	BC069541	1	CASP14_BC069541	CASP14
CASP1_BC062327	CASP1	BC062327	1	CASP1_BC062327	CASP1
CASP2_BC002427	CASP2	BC002427	1	CASP2_BC002427	CASP2
CASP3_BC016926	CASP3	BC016926	1	CASP3_BC016926	CASP3
CASP6_BC000305	CASP6	BC000305	1	CASP6_BC000305	CASP6
CASP7_BC015799	CASP7	BC015799	1	CASP7_BC015799	CASP7
CASP9_BC006463	CASP9	BC006463	1	CASP9_BC006463	CASP9
CASQ1_BC022289	CASQ1	BC022289	1	CASQ1_BC022289	CASQ1
CASQ2_BC022288	CASQ2	BC022288	1	CASQ2_BC022288	CASQ2
CAST_BC013579	CAST	BC013579	1	CAST_BC013579	CAST
CATSPER1_BC032950	CATSPER1	BC032950	1	CATSPER1_BC032950	CATSPER1
CATSPER2_BC028728	CATSPER2	BC028728	1	CATSPER2_BC028728	CATSPER2
CAV1_BC009685	CAV1	BC009685	1	CAV1_BC009685	CAV1
CAV2_BC005256	CAV2	BC005256	1	CAV2_BC005256	CAV2
CAV3_BC069368	CAV3	BC069368	1	CAV3_BC069368	CAV3
CBARA1_BC016641	CBARA1	BC016641	1	CBARA1_BC016641	CBARA1
CBFA2T2_BC015066	CBFA2T2	BC015066	1	CBFA2T2_BC015066	CBFA2T2
CBFA2T2_BC040344	CBFA2T2	BC040344	1	CBFA2T2_BC040344	CBFA2T2
CBFB_BC018509	CBFB	BC018509	1	CBFB_BC018509	CBFB
CBLB_BC032851	CBLB	BC032851	1	CBLB_BC032851	CBLB
CBLC_BC028915	CBLC	BC028915	1	CBLC_BC028915	CBLC
CBLN4_BC069516	CBLN4	BC069516	1	CBLN4_BC069516	CBLN4
CBR1_BC002511	CBR1	BC002511	1	CBR1_BC002511	CBR1
CBR3_BC002812	CBR3	BC002812	1	CBR3_BC002812	CBR3
CBR4_BC021973	CBR4	BC021973	2	CBR4_BC021973,CBR4_BC033650	CBR4
CBR4_BC033650	CBR4	BC033650	2	CBR4_BC021973,CBR4_BC033650	CBR4
CBS_BC000440	CBS	BC000440	3	CBS_BC000440,CBS_BC007257,CBS_BC010242	CBS
CBS_BC007257	CBS	BC007257	3	CBS_BC000440,CBS_BC007257,CBS_BC010242	CBS
CBS_BC010242	CBS	BC010242	3	CBS_BC000440,CBS_BC007257,CBS_BC010242	CBS
CBWD1_BC005996	CBWD1	BC005996	1	CBWD1_BC005996	CBWD1
CBWD1_BC009573	CBWD1	BC009573	1	CBWD1_BC009573	CBWD1
CBWD5_BC067803	CBWD5	BC067803	1	CBWD5_BC067803	CBWD5
CBX2_BC004252	CBX2	BC004252	1	CBX2_BC004252	CBX2
CBX4_BC014967	CBX4	BC014967	1	CBX4_BC014967	CBX4
CBX5_BC006821	CBX5	BC006821	1	CBX5_BC006821	CBX5
CBX6_BC012111	CBX6	BC012111	2	CBX6_BC012111,CBX6_BC064900	CBX6
CBX6_BC064900	CBX6	BC064900	2	CBX6_BC012111,CBX6_BC064900	CBX6
CBX7_BC051773	CBX7	BC051773	1	CBX7_BC051773	CBX7
CBX8_BC009376	CBX8	BC009376	1	CBX8_BC009376	CBX8
CC2D1B_BC007912	CC2D1B	BC007912	1	CC2D1B_BC007912	CC2D1B
CC2D1B_BC016880	CC2D1B	BC016880	1	CC2D1B_BC016880	CC2D1B
CCBE1_BC046645	CCBE1	BC046645	1	CCBE1_BC046645	CCBE1
CCBL1_BC021262	CCBL1	BC021262	2	CCBL1_BC021262,CCBL1_BC033685	CCBL1
CCBL1_BC033685	CCBL1	BC033685	2	CCBL1_BC021262,CCBL1_BC033685	CCBL1
CCBP2_BC020558	CCBP2	BC020558	1	CCBP2_BC020558	CCBP2
CCDC11_BC030606	CCDC11	BC030606	1	CCDC11_BC030606	CCDC11
CCDC12_BC020830	CCDC12	BC020830	1	CCDC12_BC020830	CCDC12
CCDC14_BC040285	CCDC14	BC040285	1	CCDC14_BC040285	CCDC14
CCDC16_BC011584	CCDC16	BC011584	1	CCDC16_BC011584	CCDC16
CCDC21_BC019902	CCDC21	BC019902	1	CCDC21_BC019902	CCDC21
CCDC22_BC000972	CCDC22	BC000972	1	CCDC22_BC000972	CCDC22
CCDC23_BC029427	CCDC23	BC029427	1	CCDC23_BC029427	CCDC23
CCDC24_BC033868	CCDC24	BC033868	1	CCDC24_BC033868	CCDC24
CCDC25_BC065295	CCDC25	BC065295	1	CCDC25_BC065295	CCDC25
CCDC26_BC026098	CCDC26	BC026098	2	CCDC26_BC026098,CCDC26_BC070152	CCDC26
CCDC26_BC070152	CCDC26	BC070152	2	CCDC26_BC026098,CCDC26_BC070152	CCDC26
CCDC28A_BC000758	CCDC28A	BC000758	1	CCDC28A_BC000758	CCDC28A
CCDC28A_BC013019	CCDC28A	BC013019	1	CCDC28A_BC013019	CCDC28A
CCDC28B_BC002462	CCDC28B	BC002462	2	CCDC28B_BC002462,CCDC28B_BC022848	CCDC28B
CCDC28B_BC022848	CCDC28B	BC022848	2	CCDC28B_BC002462,CCDC28B_BC022848	CCDC28B
CCDC5_BC005958	CCDC5	BC005958	1	CCDC5_BC005958	CCDC5
CCDC5_BC014003	CCDC5	BC014003	1	CCDC5_BC014003	CCDC5
CCDC7_BC022020	CCDC7	BC022020	1	CCDC7_BC022020	CCDC7
CCDC9_BC002787	CCDC9	BC002787	1	CCDC9_BC002787	CCDC9
CCK_BC008283	CCK	BC008283	1	CCK_BC008283	CCK
CCKBR_BC000740	CCKBR	BC000740	1	CCKBR_BC000740	CCKBR
CCL11_BC017850	CCL11	BC017850	1	CCL11_BC017850	CCL11
CCL13_BC008621	CCL13	BC008621	1	CCL13_BC008621	CCL13
CCL14_BC045165	CCL14	BC045165	1	CCL14_BC045165	CCL14
CCL18_BC069700	CCL18	BC069700	1	CCL18_BC069700	CCL18
CCL19_BC027968	CCL19	BC027968	1	CCL19_BC027968	CCL19
CCL20_BC020698	CCL20	BC020698	1	CCL20_BC020698	CCL20
CCL21_BC027918	CCL21	BC027918	1	CCL21_BC027918	CCL21
CCL22_BC027952	CCL22	BC027952	1	CCL22_BC027952	CCL22
CCL24_BC069391	CCL24	BC069391	1	CCL24_BC069391	CCL24
CCL28_BC069532	CCL28	BC069532	1	CCL28_BC069532	CCL28
CCL2_BC009716	CCL2	BC009716	1	CCL2_BC009716	CCL2
CCL3L3_BC007783	CCL3L3	BC007783	1	CCL3L3_BC007783	CCL3L3
CCL5_BC008600	CCL5	BC008600	1	CCL5_BC008600	CCL5
CCM2_BC016832	CCM2	BC016832	2	CCM2_BC016832,CCM2_BC063663	CCM2
CCM2_BC063663	CCM2	BC063663	2	CCM2_BC016832,CCM2_BC063663	CCM2
CCNA1_BC036346	CCNA1	BC036346	1	CCNA1_BC036346	CCNA1
CCNB1IP1_BC000369	CCNB1IP1	BC000369	1	CCNB1IP1_BC000369	CCNB1IP1
CCNC_BC010135	CCNC	BC010135	2	CCNC_BC010135,CCNC_BC056153	CCNC
CCNC_BC056153	CCNC	BC056153	2	CCNC_BC010135,CCNC_BC056153	CCNC
CCND1_BC000076	CCND1	BC000076	2	CCND1_BC000076,CCND1_BC023620	CCND1
CCND1_BC023620	CCND1	BC023620	2	CCND1_BC000076,CCND1_BC023620	CCND1
CCND2_BC010958	CCND2	BC010958	1	CCND2_BC010958	CCND2
CCND3_BC011616	CCND3	BC011616	1	CCND3_BC011616	CCND3
CCNDBP1_BC009689	CCNDBP1	BC009689	1	CCNDBP1_BC009689	CCNDBP1
CCNE1_BC035498	CCNE1	BC035498	1	CCNE1_BC035498	CCNE1
CCNE2_BC007015	CCNE2	BC007015	1	CCNE2_BC007015	CCNE2
CCNE2_BC020729	CCNE2	BC020729	1	CCNE2_BC020729	CCNE2
CCNF_BC012349	CCNF	BC012349	1	CCNF_BC012349	CCNF
CCNG1_BC000196	CCNG1	BC000196	2	CCNG1_BC000196,CCNG1_BC007093	CCNG1
CCNG1_BC007093	CCNG1	BC007093	2	CCNG1_BC000196,CCNG1_BC007093	CCNG1
CCNG2_BC032518	CCNG2	BC032518	1	CCNG2_BC032518	CCNG2
CCNH_BC005280	CCNH	BC005280	3	CCNH_BC005280,CCNH_BC016705,CCNH_BC022351	CCNH
CCNH_BC016705	CCNH	BC016705	3	CCNH_BC005280,CCNH_BC016705,CCNH_BC022351	CCNH
CCNH_BC022351	CCNH	BC022351	3	CCNH_BC005280,CCNH_BC016705,CCNH_BC022351	CCNH
CCNI_BC004975	CCNI	BC004975	1	CCNI_BC004975	CCNI
CCNJ_BC043175	CCNJ	BC043175	1	CCNJ_BC043175	CCNJ
CCNK_BC015935	CCNK	BC015935	1	CCNK_BC015935	CCNK
CCNL1_BC038394	CCNL1	BC038394	1	CCNL1_BC038394	CCNL1
CCPG1_BC034914	CCPG1	BC034914	1	CCPG1_BC034914	CCPG1
CCR1_BC051306	CCR1	BC051306	1	CCR1_BC051306	CCR1
CCR3_BC033514	CCR3	BC033514	1	CCR3_BC033514	CCR3
CCR4_BC071751	CCR4	BC071751	1	CCR4_BC071751	CCR4
CCR6_BC037960	CCR6	BC037960	1	CCR6_BC037960	CCR6
CCR9_BC069678	CCR9	BC069678	1	CCR9_BC069678	CCR9
CCRK_BC002655	CCRK	BC002655	1	CCRK_BC002655	CCRK
CCRL1_BC069438	CCRL1	BC069438	1	CCRL1_BC069438	CCRL1
CCRL2_BC025717	CCRL2	BC025717	2	CCRL2_BC025717,CCRL2_BC071682	CCRL2
CCRL2_BC071682	CCRL2	BC071682	2	CCRL2_BC025717,CCRL2_BC071682	CCRL2
CCT3_BC008019	CCT3	BC008019	1	CCT3_BC008019	CCT3
CCT5_BC006543	CCT5	BC006543	1	CCT5_BC006543	CCT5
CCT6B_BC027591	CCT6B	BC027591	1	CCT6B_BC027591	CCT6B
CCT7_BC019296	CCT7	BC019296	1	CCT7_BC019296	CCT7
CCT8_BC072001	CCT8	BC072001	1	CCT8_BC072001	CCT8
CD14_BC010507	CD14	BC010507	1	CD14_BC010507	CD14
CD151_BC013302	CD151	BC013302	1	CD151_BC013302	CD151
CD160_BC014465	CD160	BC014465	1	CD160_BC014465	CD160
CD164_BC011522	CD164	BC011522	1	CD164_BC011522	CD164
CD177_BC029167	CD177	BC029167	1	CD177_BC029167	CD177
CD1A_BC031645	CD1A	BC031645	1	CD1A_BC031645	CD1A
CD1B_BC069481	CD1B	BC069481	1	CD1B_BC069481	CD1B
CD1D_BC027926	CD1D	BC027926	1	CD1D_BC027926	CD1D
CD200_BC022522	CD200	BC022522	1	CD200_BC022522	CD200
CD200R1_BC069661	CD200R1	BC069661	1	CD200R1_BC069661	CD200R1
CD207_BC022278	CD207	BC022278	1	CD207_BC022278	CD207
CD244_BC053985	CD244	BC053985	1	CD244_BC053985	CD244
CD24_BC007674	CD24	BC007674	1	CD24_BC007674	CD24
CD2_BC033583	CD2	BC033583	1	CD2_BC033583	CD2
CD2BP2_BC000495	CD2BP2	BC000495	1	CD2BP2_BC000495	CD2BP2
CD300A_BC032352	CD300A	BC032352	1	CD300A_BC032352	CD300A
CD300C_BC022279	CD300C	BC022279	1	CD300C_BC022279	CD300C
CD300LB_BC028091	CD300LB	BC028091	1	CD300LB_BC028091	CD300LB
CD300LG_BC025395	CD300LG	BC025395	1	CD300LG_BC025395	CD300LG
CD302_BC020646	CD302	BC020646	1	CD302_BC020646	CD302
CD320_BC000668	CD320	BC000668	1	CD320_BC000668	CD320
CD33_BC028152	CD33	BC028152	1	CD33_BC028152	CD33
CD34_BC039146	CD34	BC039146	1	CD34_BC039146	CD34
CD36_BC008406	CD36	BC008406	1	CD36_BC008406	CD36
CD38_BC007964	CD38	BC007964	1	CD38_BC007964	CD38
CD3D_BC070321	CD3D	BC070321	1	CD3D_BC070321	CD3D
CD3E_BC049847	CD3E	BC049847	1	CD3E_BC049847	CD3E
CD3Z_BC025703	CD3Z	BC025703	1	CD3Z_BC025703	CD3Z
CD40_BC012419	CD40	BC012419	1	CD40_BC012419	CD40
CD40LG_BC071754	CD40LG	BC071754	1	CD40LG_BC071754	CD40LG
CD44_BC004372	CD44	BC004372	1	CD44_BC004372	CD44
CD47_BC012884	CD47	BC012884	1	CD47_BC012884	CD47
CD48_BC016182	CD48	BC016182	2	CD48_BC016182,CD48_BC030224	CD48
CD48_BC030224	CD48	BC030224	2	CD48_BC016182,CD48_BC030224	CD48
CD4_BC025782	CD4	BC025782	1	CD4_BC025782	CD4
CD52_BC000644	CD52	BC000644	1	CD52_BC000644	CD52
CD58_BC005930	CD58	BC005930	1	CD58_BC005930	CD58
CD59_BC001506	CD59	BC001506	1	CD59_BC001506	CD59
CD5L_BC033586	CD5L	BC033586	1	CD5L_BC033586	CD5L
CD68_BC015557	CD68	BC015557	1	CD68_BC015557	CD68
CD69_BC007037	CD69	BC007037	1	CD69_BC007037	CD69
CD6_BC078669	CD6	BC078669	1	CD6_BC078669	CD6
CD72_BC030227	CD72	BC030227	1	CD72_BC030227	CD72
CD74_BC018726	CD74	BC018726	1	CD74_BC018726	CD74
CD79B_BC030210	CD79B	BC030210	2	CD79B_BC030210,CD79B_BC032651	CD79B
CD79B_BC032651	CD79B	BC032651	2	CD79B_BC030210,CD79B_BC032651	CD79B
CD7_BC013297	CD7	BC013297	1	CD7_BC013297	CD7
CD81_BC002978	CD81	BC002978	1	CD81_BC002978	CD81
CD82_BC000726	CD82	BC000726	1	CD82_BC000726	CD82
CD83_BC030830	CD83	BC030830	1	CD83_BC030830	CD83
CD84_BC020063	CD84	BC020063	1	CD84_BC020063	CD84
CD86_BC040261	CD86	BC040261	1	CD86_BC040261	CD86
CD96_BC020749	CD96	BC020749	1	CD96_BC020749	CD96
CD99_BC002584	CD99	BC002584	2	CD99_BC002584,CD99_BC003147	CD99
CD99_BC003147	CD99	BC003147	2	CD99_BC002584,CD99_BC003147	CD99
CD99L2_BC025729	CD99L2	BC025729	2	CD99L2_BC025729,CD99L2_BC030536	CD99L2
CD99L2_BC030536	CD99L2	BC030536	2	CD99L2_BC025729,CD99L2_BC030536	CD99L2
CD9_BC011988	CD9	BC011988	1	CD9_BC011988	CD9
CDA08_BC006321	CDA08	BC006321	1	CDA08_BC006321	CDA08
CDA_BC054036	CDA	BC054036	1	CDA_BC054036	CDA
CDADC1_BC009562	CDADC1	BC009562	1	CDADC1_BC009562	CDADC1
CDC16_BC010875	CDC16	BC010875	1	CDC16_BC010875	CDC16
CDC16_BC017244	CDC16	BC017244	1	CDC16_BC017244	CDC16
CDC20_BC000624	CDC20	BC000624	3	CDC20_BC000624,CDC20_BC006272,CDC20_BC010044	CDC20
CDC20_BC006272	CDC20	BC006272	3	CDC20_BC000624,CDC20_BC006272,CDC20_BC010044	CDC20
CDC20_BC010044	CDC20	BC010044	3	CDC20_BC000624,CDC20_BC006272,CDC20_BC010044	CDC20
CDC23_BC017713	CDC23	BC017713	1	CDC23_BC017713	CDC23
CDC25A_BC007401	CDC25A	BC007401	1	CDC25A_BC007401	CDC25A
CDC25C_BC019089	CDC25C	BC019089	1	CDC25C_BC019089	CDC25C
CDC26_BC066300	CDC26	BC066300	1	CDC26_BC066300	CDC26
CDC27_BC011656	CDC27	BC011656	1	CDC27_BC011656	CDC27
CDC2_BC014563	CDC2	BC014563	1	CDC2_BC014563	CDC2
CDC2L5_BC001274	CDC2L5	BC001274	1	CDC2L5_BC001274	CDC2L5
CDC34_BC018143	CDC34	BC018143	1	CDC34_BC018143	CDC34
CDC37L1_BC014133	CDC37L1	BC014133	1	CDC37L1_BC014133	CDC37L1
CDC42_BC018266	CDC42	BC018266	1	CDC42_BC018266	CDC42
CDC42EP1_BC009356	CDC42EP1	BC009356	1	CDC42EP1_BC009356	CDC42EP1
CDC42EP2_BC022337	CDC42EP2	BC022337	1	CDC42EP2_BC022337	CDC42EP2
CDC42EP3_BC019270	CDC42EP3	BC019270	1	CDC42EP3_BC019270	CDC42EP3
CDC42EP4_BC002774	CDC42EP4	BC002774	2	CDC42EP4_BC002774,CDC42EP4_BC010451	CDC42EP4
CDC42EP4_BC010451	CDC42EP4	BC010451	2	CDC42EP4_BC002774,CDC42EP4_BC010451	CDC42EP4
CDC42SE1_BC012796	CDC42SE1	BC012796	1	CDC42SE1_BC012796	CDC42SE1
CDC45L_BC010022	CDC45L	BC010022	1	CDC45L_BC010022	CDC45L
CDC5L_BC001568	CDC5L	BC001568	1	CDC5L_BC001568	CDC5L
CDC73_BC014351	CDC73	BC014351	1	CDC73_BC014351	CDC73
CDC73_BC065037	CDC73	BC065037	1	CDC73_BC065037	CDC73
CDCA1_BC008489	CDCA1	BC008489	1	CDCA1_BC008489	CDCA1
CDCA3_BC002551	CDCA3	BC002551	1	CDCA3_BC002551	CDCA3
CDCA4_BC011736	CDCA4	BC011736	2	CDCA4_BC011736,CDCA4_BC025263	CDCA4
CDCA4_BC025263	CDCA4	BC025263	2	CDCA4_BC011736,CDCA4_BC025263	CDCA4
CDCA5_BC011000	CDCA5	BC011000	1	CDCA5_BC011000	CDCA5
CDCA7_BC027966	CDCA7	BC027966	1	CDCA7_BC027966	CDCA7
CDCA7L_BC025242	CDCA7L	BC025242	2	CDCA7L_BC025242,CDCA7L_BC039823	CDCA7L
CDCA7L_BC039823	CDCA7L	BC039823	2	CDCA7L_BC025242,CDCA7L_BC039823	CDCA7L
CDCA8_BC000703	CDCA8	BC000703	2	CDCA8_BC000703,CDCA8_BC016944	CDCA8
CDCA8_BC016944	CDCA8	BC016944	2	CDCA8_BC000703,CDCA8_BC016944	CDCA8
CDCP1_BC021099	CDCP1	BC021099	1	CDCP1_BC021099	CDCP1
CDH11_BC013609	CDH11	BC013609	1	CDH11_BC013609	CDH11
CDH13_BC030653	CDH13	BC030653	1	CDH13_BC030653	CDH13
CDH15_BC008951	CDH15	BC008951	1	CDH15_BC008951	CDH15
CDH16_BC027912	CDH16	BC027912	1	CDH16_BC027912	CDH16
CDH18_BC031051	CDH18	BC031051	1	CDH18_BC031051	CDH18
CDH19_BC015877	CDH19	BC015877	1	CDH19_BC015877	CDH19
CDH23_BC032581	CDH23	BC032581	1	CDH23_BC032581	CDH23
CDH26_BC062570	CDH26	BC062570	1	CDH26_BC062570	CDH26
CDH2_BC036470	CDH2	BC036470	1	CDH2_BC036470	CDH2
CDH3_BC041846	CDH3	BC041846	1	CDH3_BC041846	CDH3
CDH6_BC000019	CDH6	BC000019	1	CDH6_BC000019	CDH6
CDIPT_BC001444	CDIPT	BC001444	1	CDIPT_BC001444	CDIPT
CDK10_BC017342	CDK10	BC017342	1	CDK10_BC017342	CDK10
CDK2AP1_BC034717	CDK2AP1	BC034717	1	CDK2AP1_BC034717	CDK2AP1
CDK2AP2_BC002850	CDK2AP2	BC002850	1	CDK2AP2_BC002850	CDK2AP2
CDK2_BC003065	CDK2	BC003065	1	CDK2_BC003065	CDK2
CDK4_BC005864	CDK4	BC005864	1	CDK4_BC005864	CDK4
CDK5_BC005115	CDK5	BC005115	1	CDK5_BC005115	CDK5
CDK5R1_BC020580	CDK5R1	BC020580	3	CDK5R1_BC020580,CDK5R1_BC026347,CDK5R1_BC030792	CDK5R1
CDK5R1_BC026347	CDK5R1	BC026347	3	CDK5R1_BC020580,CDK5R1_BC026347,CDK5R1_BC030792	CDK5R1
CDK5R1_BC030792	CDK5R1	BC030792	3	CDK5R1_BC020580,CDK5R1_BC026347,CDK5R1_BC030792	CDK5R1
CDK5RAP1_BC001215	CDK5RAP1	BC001215	2	CDK5RAP1_BC001215,CDK5RAP1_BC050706	CDK5RAP1
CDK5RAP1_BC050706	CDK5RAP1	BC050706	2	CDK5RAP1_BC001215,CDK5RAP1_BC050706	CDK5RAP1
CDK5RAP3_BC009957	CDK5RAP3	BC009957	1	CDK5RAP3_BC009957	CDK5RAP3
CDK6_BC027989	CDK6	BC027989	1	CDK6_BC027989	CDK6
CDK6_BC052264	CDK6	BC052264	1	CDK6_BC052264	CDK6
CDK7_BC000834	CDK7	BC000834	2	CDK7_BC000834,CDK7_BC005298	CDK7
CDK7_BC005298	CDK7	BC005298	2	CDK7_BC000834,CDK7_BC005298	CDK7
CDK8_BC069634	CDK8	BC069634	1	CDK8_BC069634	CDK8
CDK9_BC001968	CDK9	BC001968	1	CDK9_BC001968	CDK9
CDKAL1_BC064145	CDKAL1	BC064145	1	CDKAL1_BC064145	CDKAL1
CDKL3_BC041799	CDKL3	BC041799	1	CDKL3_BC041799	CDKL3
CDKN1A_BC000312	CDKN1A	BC000312	2	CDKN1A_BC000312,CDKN1A_BC001935	CDKN1A
CDKN1A_BC001935	CDKN1A	BC001935	2	CDKN1A_BC000312,CDKN1A_BC001935	CDKN1A
CDKN1B_BC001971	CDKN1B	BC001971	1	CDKN1B_BC001971	CDKN1B
CDKN2B_BC014469	CDKN2B	BC014469	1	CDKN2B_BC014469	CDKN2B
CDKN2C_BC000598	CDKN2C	BC000598	1	CDKN2C_BC000598	CDKN2C
CDKN2D_BC001822	CDKN2D	BC001822	1	CDKN2D_BC001822	CDKN2D
CDKN3_BC064965	CDKN3	BC064965	1	CDKN3_BC064965	CDKN3
CDO1_BC024241	CDO1	BC024241	1	CDO1_BC024241	CDO1
CDR2_BC017503	CDR2	BC017503	1	CDR2_BC017503	CDR2
CDS2_BC025751	CDS2	BC025751	1	CDS2_BC025751	CDS2
CDSN_BC031993	CDSN	BC031993	1	CDSN_BC031993	CDSN
CDV1_BC004536	CDV1	BC004536	1	CDV1_BC004536	CDV1
CDV1_BC029349	CDV1	BC029349	1	CDV1_BC029349	CDV1
CDX2_BC014461	CDX2	BC014461	1	CDX2_BC014461	CDX2
CDYL2_BC069440	CDYL2	BC069440	1	CDYL2_BC069440	CDYL2
CEACAM1_BC014473	CEACAM1	BC014473	1	CEACAM1_BC014473	CEACAM1
CEACAM21_BC012001	CEACAM21	BC012001	1	CEACAM21_BC012001	CEACAM21
CEACAM5_BC034671	CEACAM5	BC034671	1	CEACAM5_BC034671	CEACAM5
CEACAM8_BC026263	CEACAM8	BC026263	1	CEACAM8_BC026263	CEACAM8
CEBPE_BC035797	CEBPE	BC035797	1	CEBPE_BC035797	CEBPE
CEBPG_BC013128	CEBPG	BC013128	1	CEBPG_BC013128	CEBPG
CECR1_BC051755	CECR1	BC051755	1	CECR1_BC051755	CECR1
CEECAM1_BC011811	CEECAM1	BC011811	1	CEECAM1_BC011811	CEECAM1
CENPA_BC000881	CENPA	BC000881	2	CENPA_BC000881,CENPA_BC002703	CENPA
CENPA_BC002703	CENPA	BC002703	2	CENPA_BC000881,CENPA_BC002703	CENPA
CENPC1_BC030695	CENPC1	BC030695	1	CENPC1_BC030695	CENPC1
CENPH_BC012024	CENPH	BC012024	1	CENPH_BC012024	CENPH
CENTA1_BC033747	CENTA1	BC033747	1	CENTA1_BC033747	CENTA1
CENTA2_BC033758	CENTA2	BC033758	1	CENTA2_BC033758	CENTA2
CENTB1_BC018543	CENTB1	BC018543	1	CENTB1_BC018543	CENTB1
CENTD3_BC009968	CENTD3	BC009968	1	CENTD3_BC009968	CENTD3
Cep290_BC008641	Cep290	BC008641	1	Cep290_BC008641	Cep290
Cep63_BC014050	Cep63	BC014050	1	Cep63_BC014050	Cep63
Cep70_BC016050	Cep70	BC016050	2	Cep70_BC016050,Cep70_BC030598	Cep70
Cep70_BC030598	Cep70	BC030598	2	Cep70_BC016050,Cep70_BC030598	Cep70
Cep72_BC000132	Cep72	BC000132	1	Cep72_BC000132	Cep72
Cep72_BC001750	Cep72	BC001750	1	Cep72_BC001750	Cep72
[truncated: 10,125 more rows]
